# Supplementary material for: Inflammatory stress signaling via NF-kB alters accessible cholesterol to upregulate SREBP2 transcriptional activity in endothelial cells
Source: eLife journal article supplement (doi:10.7554/elife.79529), 2022-08-12

**a.**

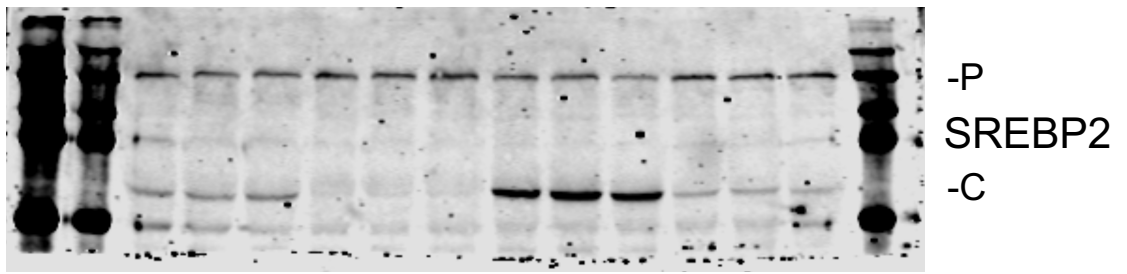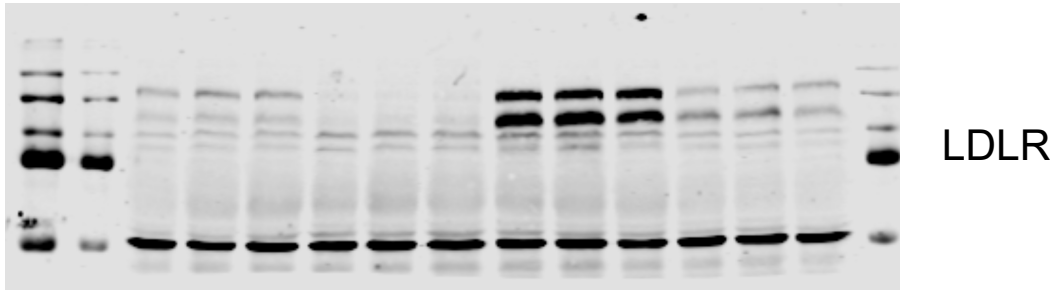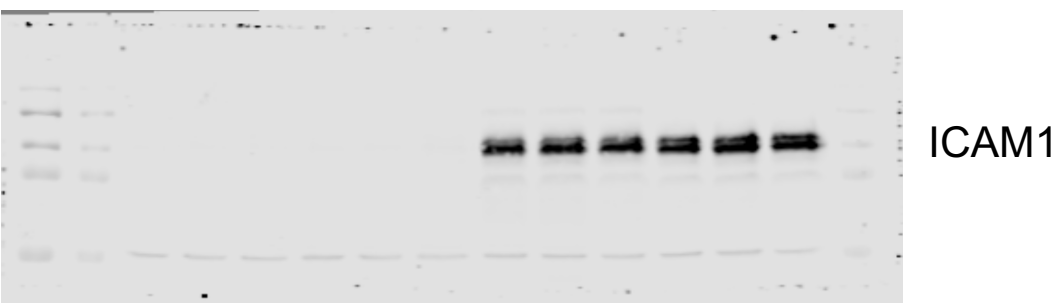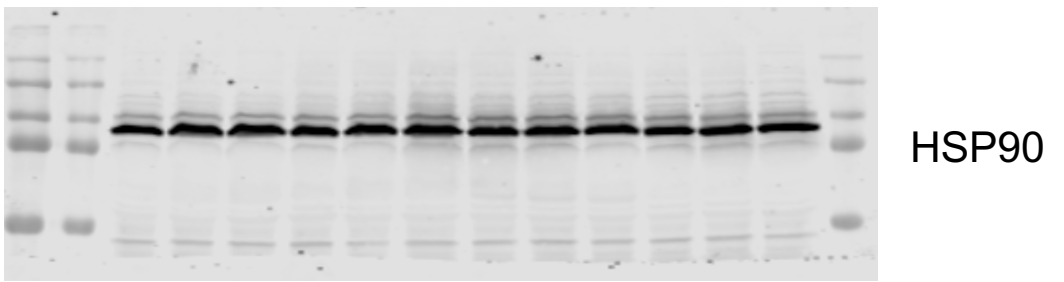

**b.**

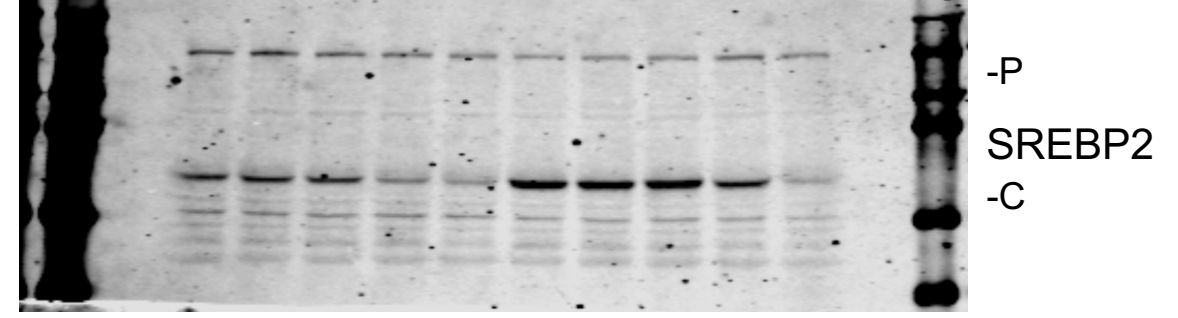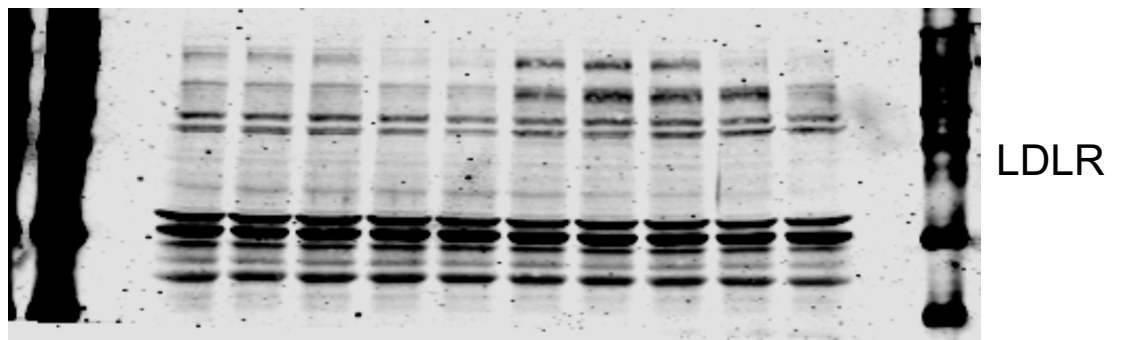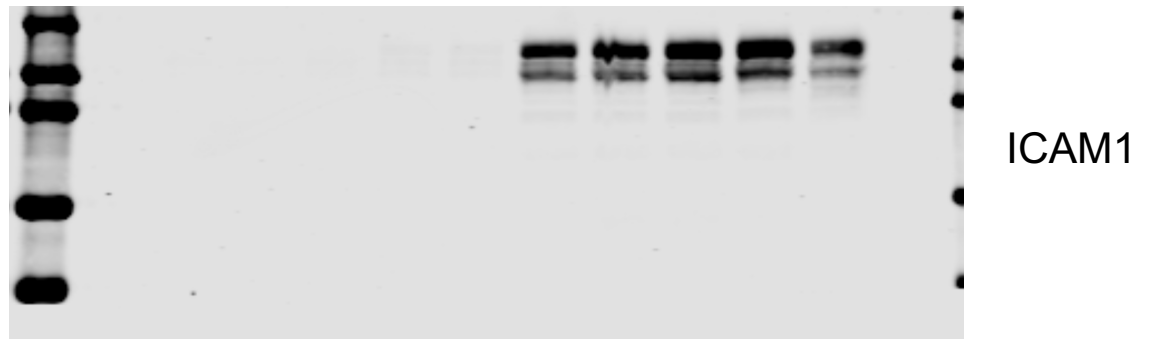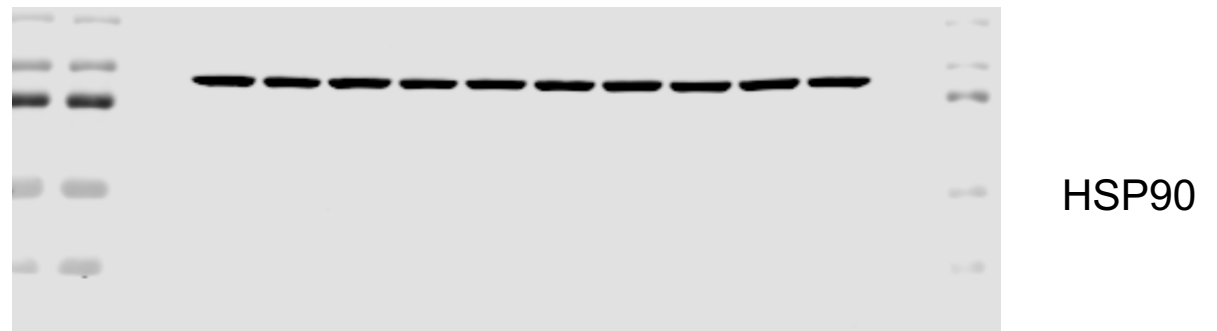

**c.**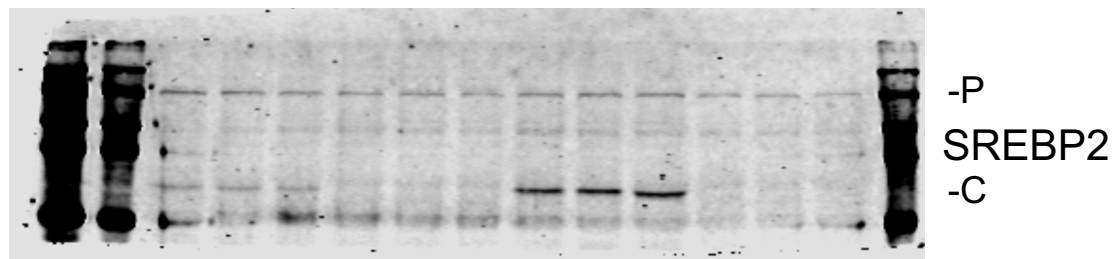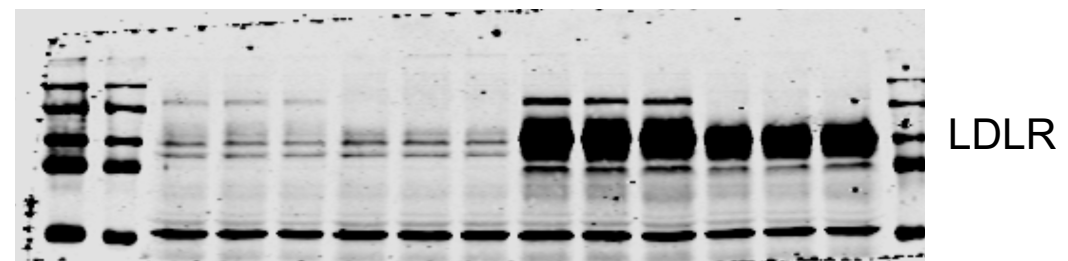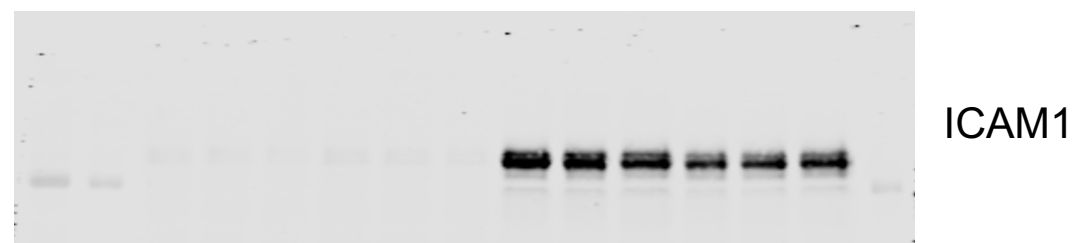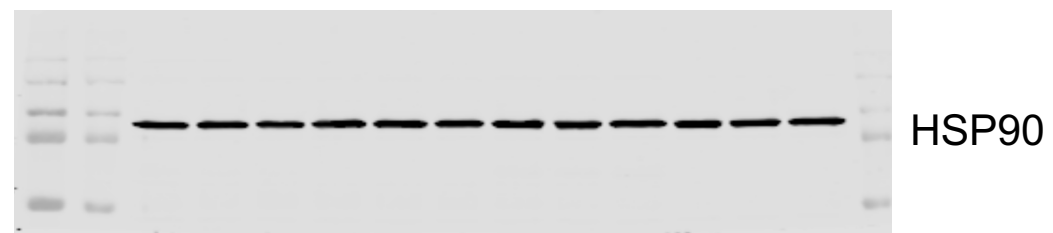**d.**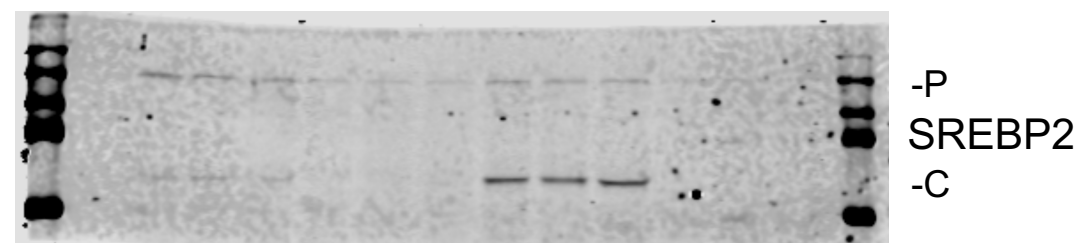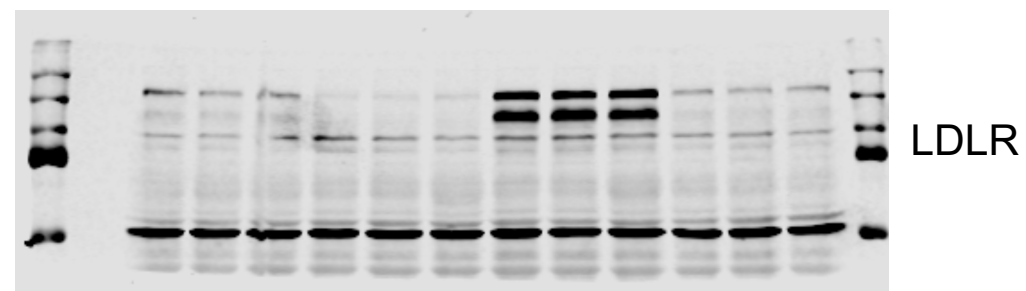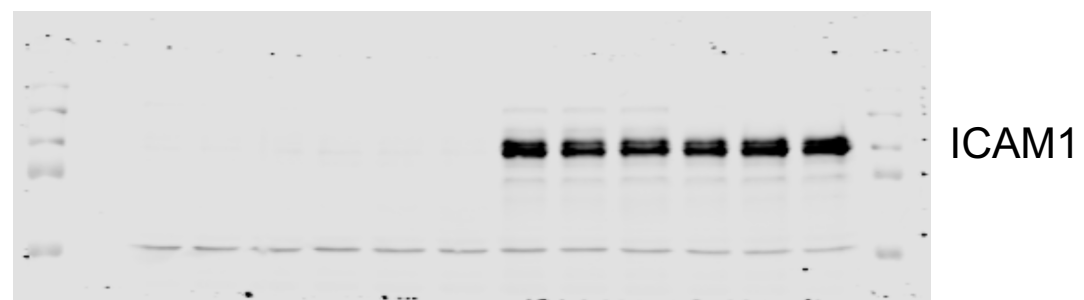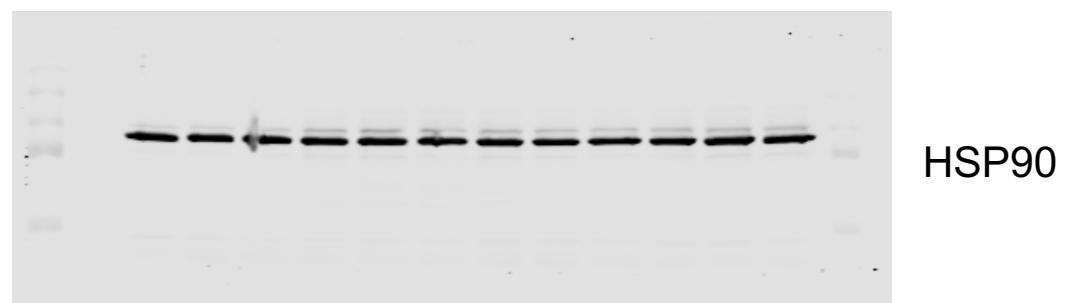

Supplement: fig4-figsupp1-data1 [file elife-79529-fig4-figsupp1-data1-v2.pdf]
