# Supplementary material for: Inflammatory stress signaling via NF-kB alters accessible cholesterol to upregulate SREBP2 transcriptional activity in endothelial cells
Source: eLife journal article supplement (doi:10.7554/elife.79529), 2022-08-12
Supplement: fig2-data1 [file elife-79529-fig2-data1-v2.pdf]

a.

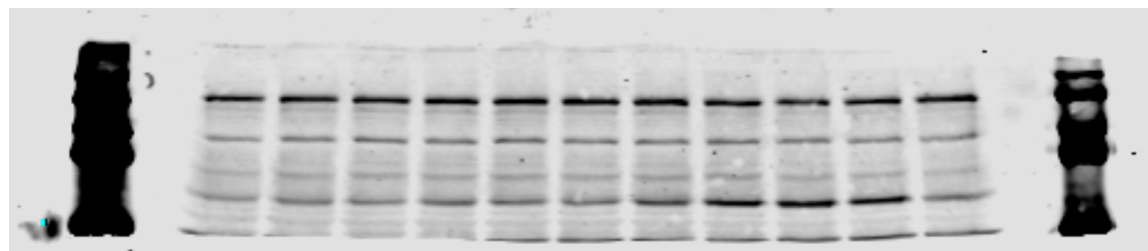

-P  
SREBP2  
-C

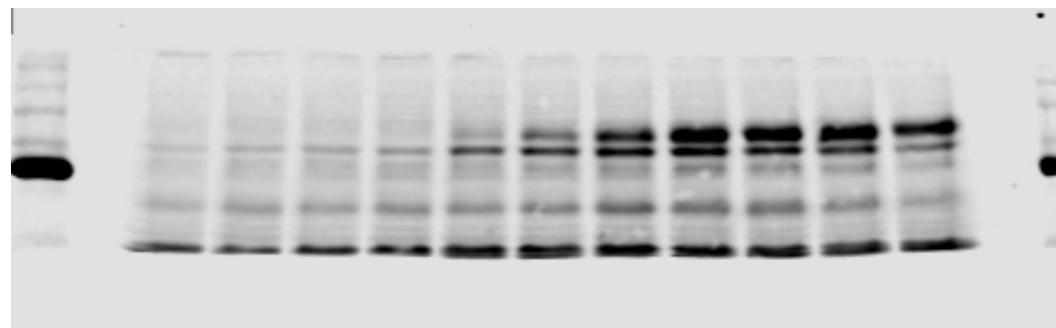

ICAM1

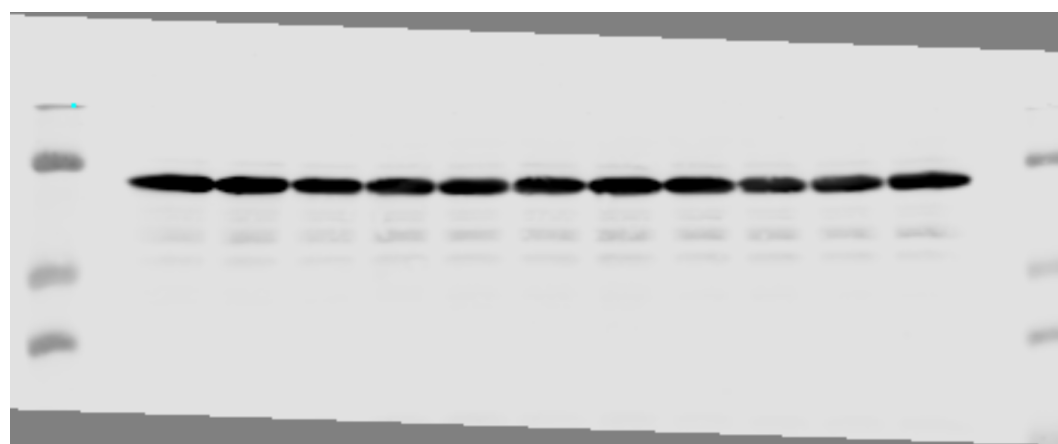

GAPDH

c.

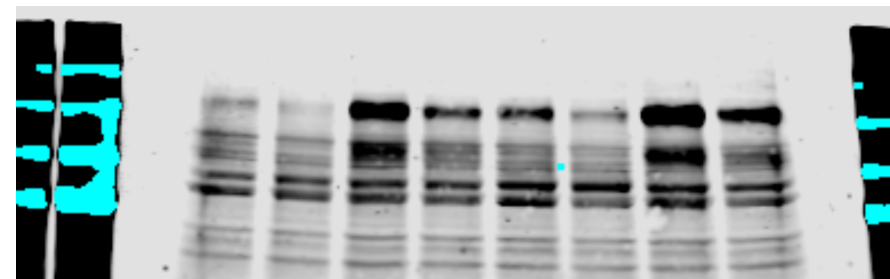

LDLR

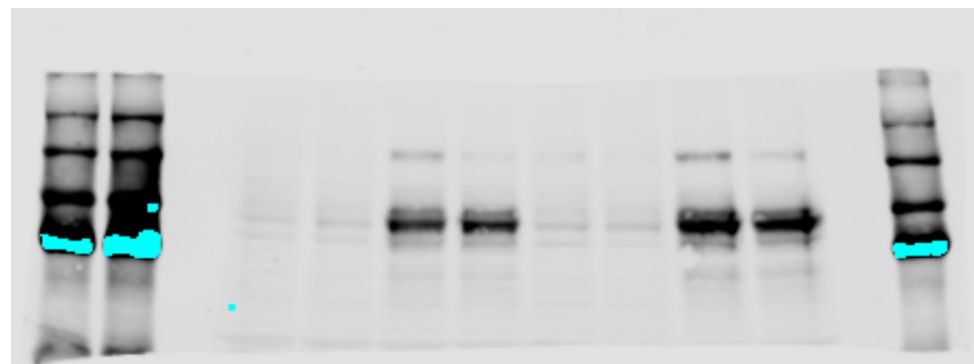

ICAM1

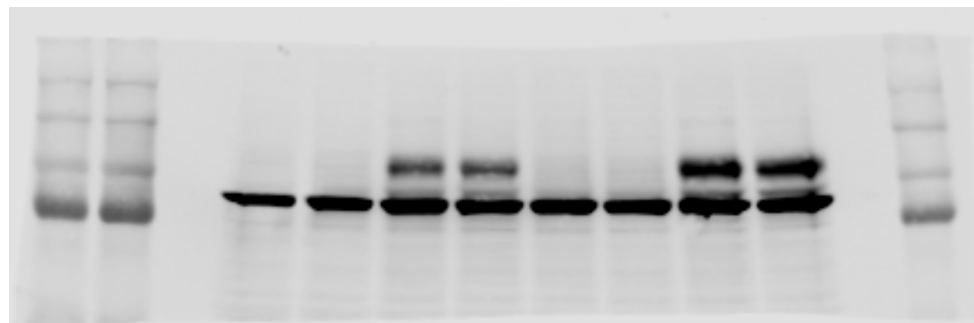

VCAM1

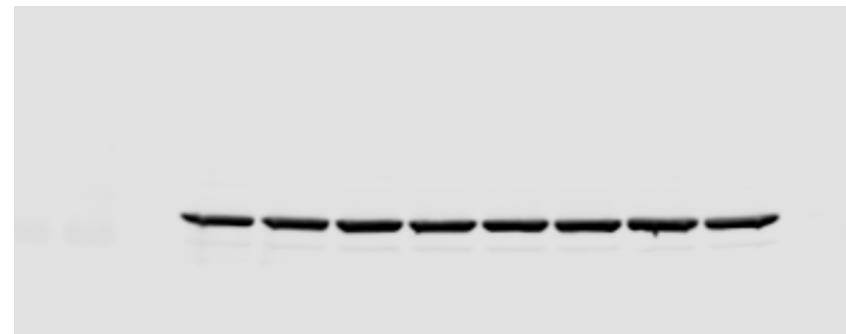

HSP90
