# Supplementary material for: Inflammatory stress signaling via NF-kB alters accessible cholesterol to upregulate SREBP2 transcriptional activity in endothelial cells
Source: eLife journal article supplement (doi:10.7554/elife.79529), 2022-08-12
Supplement: fig2-figsupp1-data1 [file elife-79529-fig2-figsupp1-data1-v2.pdf]

**a.**

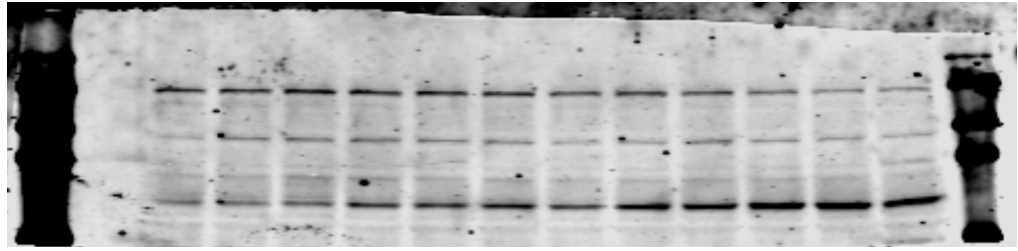

-P  
SREBP2  
-C

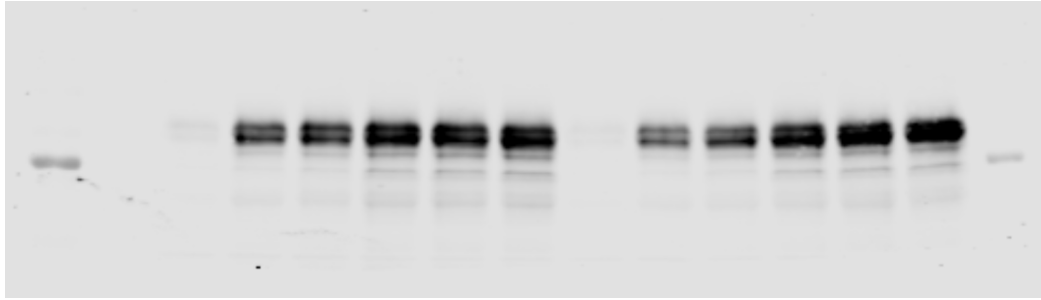

VCAM1

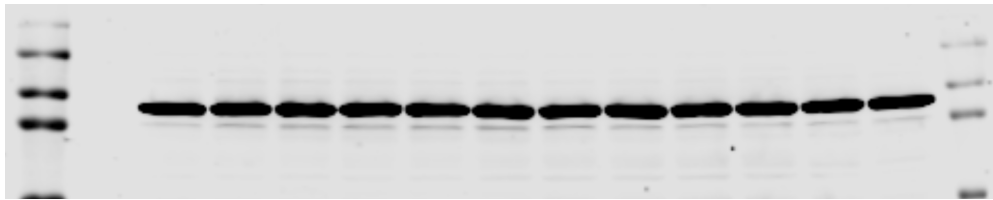

HSP90

**c.**

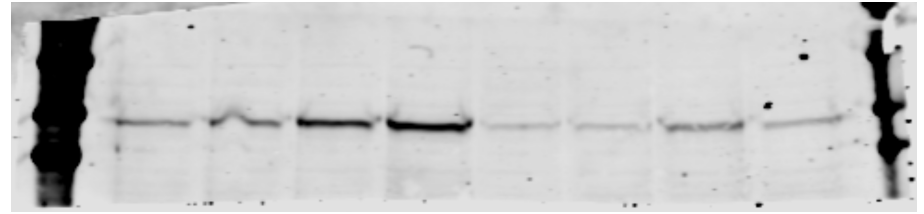

HMGCR

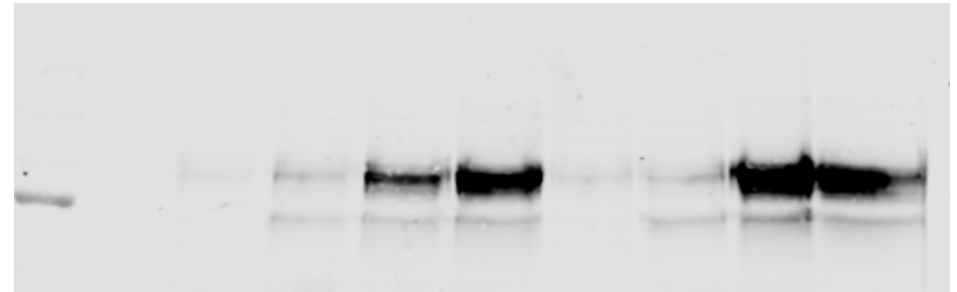

ICAM1

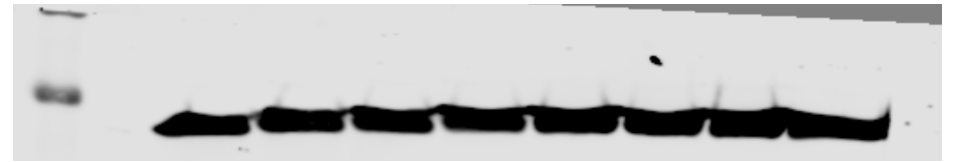

GAPDH
