# Supplementary material for: Inflammatory stress signaling via NF-kB alters accessible cholesterol to upregulate SREBP2 transcriptional activity in endothelial cells
Source: eLife journal article supplement (doi:10.7554/elife.79529), 2022-08-12
Supplement: fig4-data1 [file elife-79529-fig4-data1-v2.pdf]

**b.**

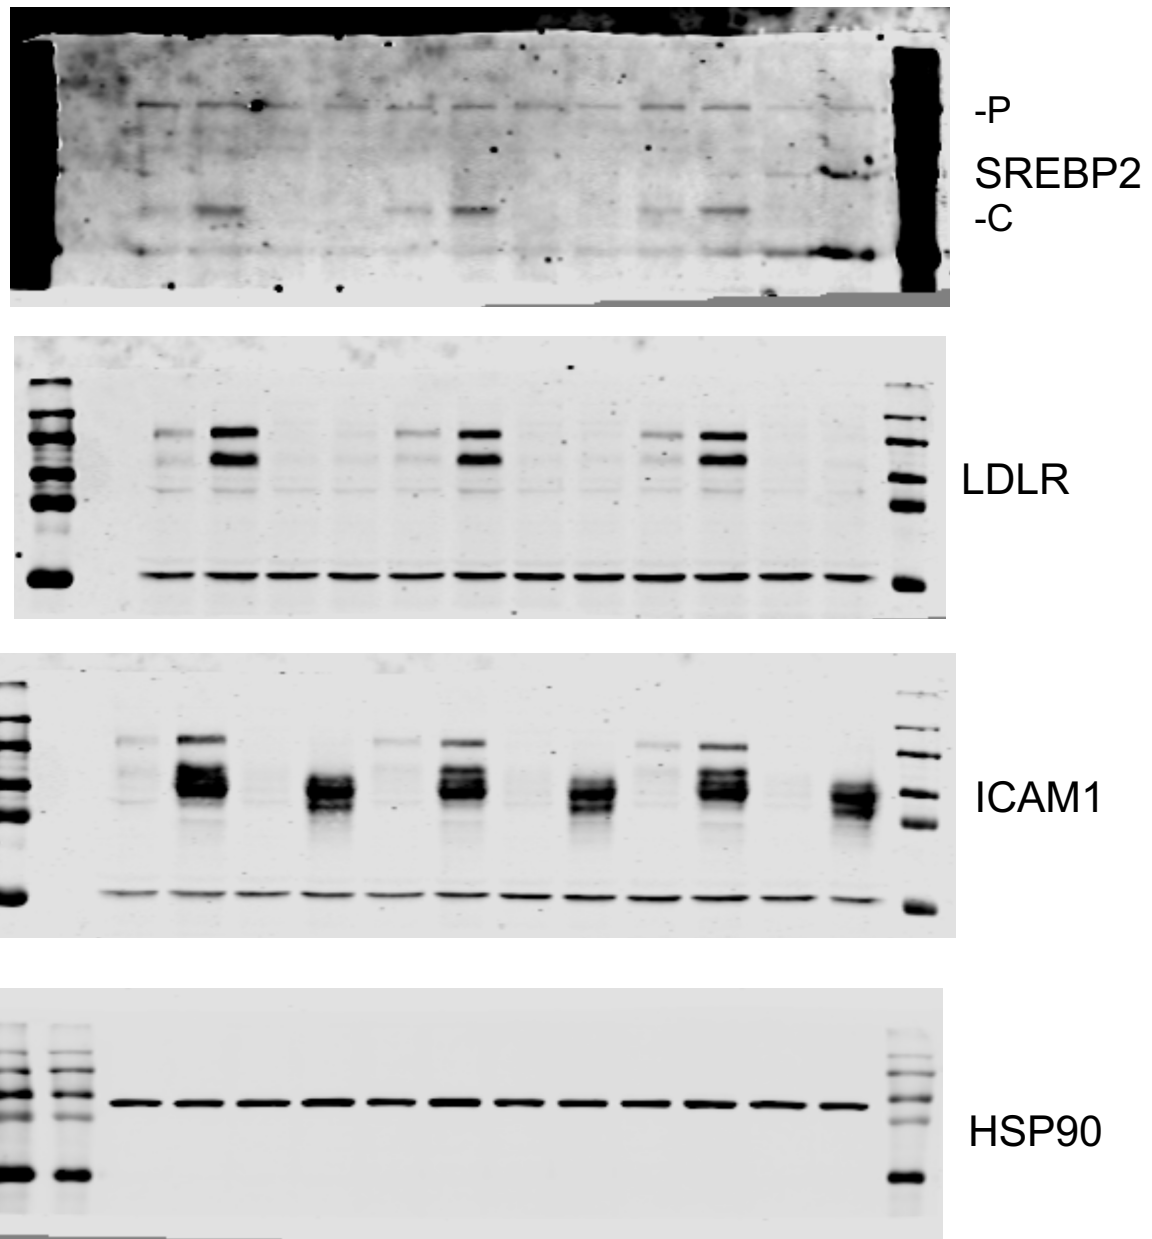

**c.**

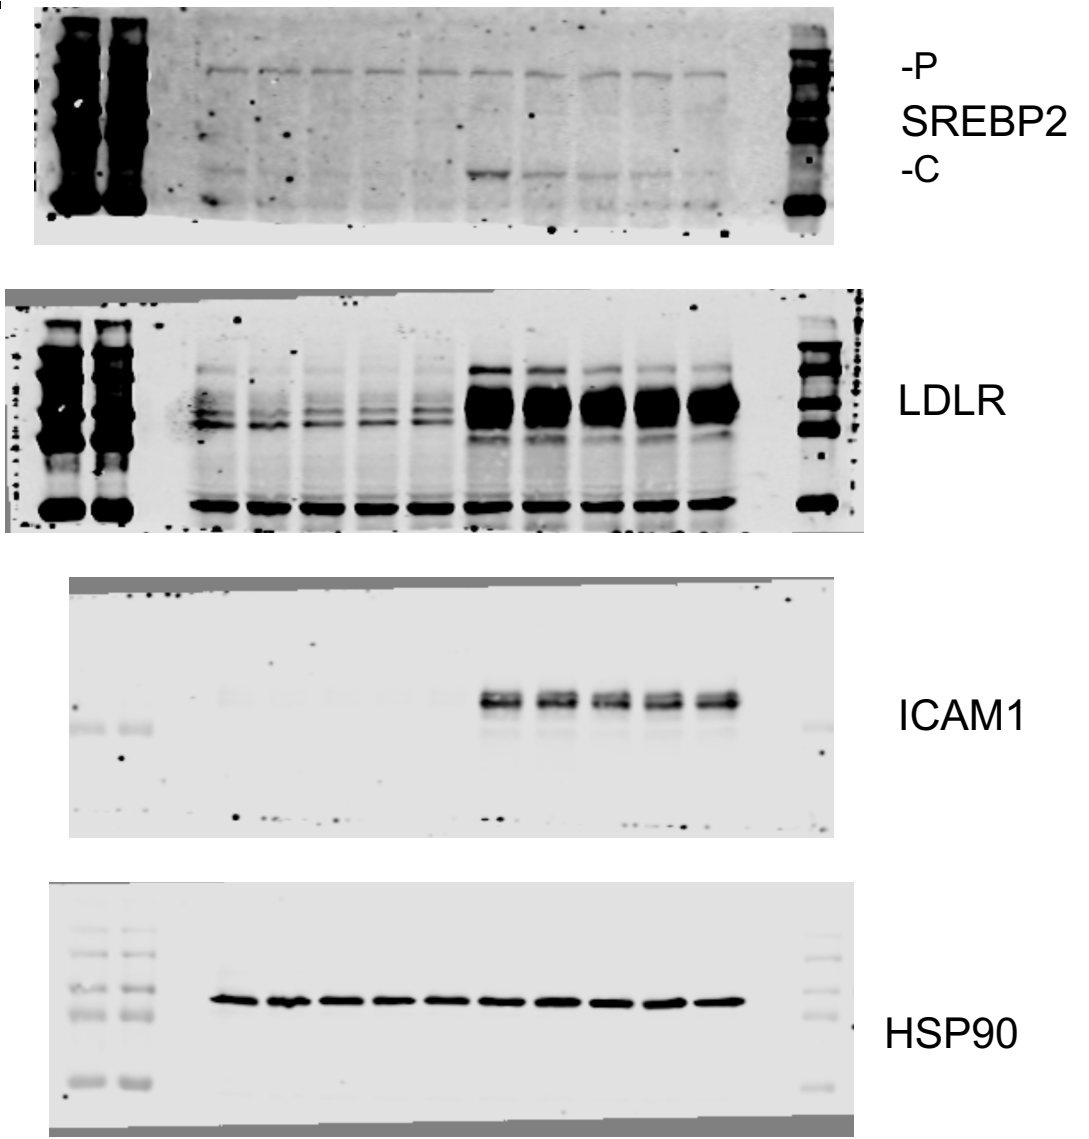

d.

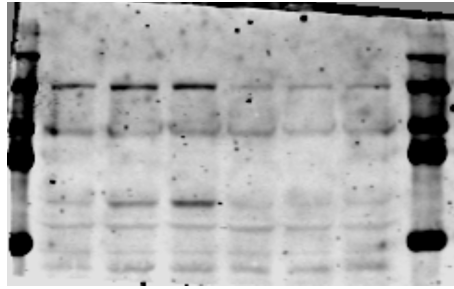

-P  
SREBP2  
-C

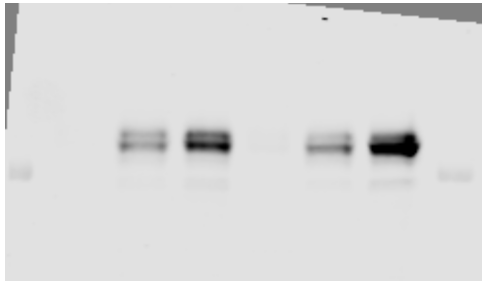

ICAM1

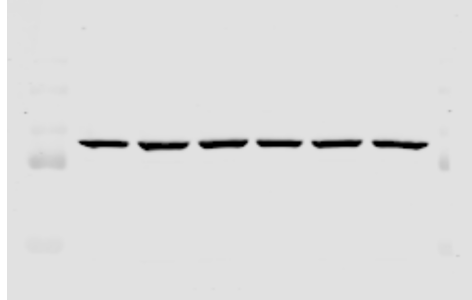

HSP90

e.

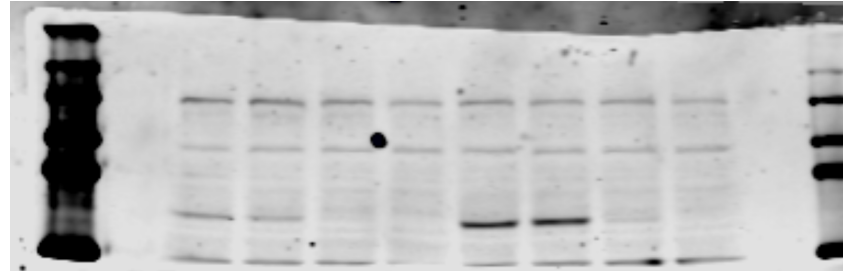

-P  
SREBP2  
-C

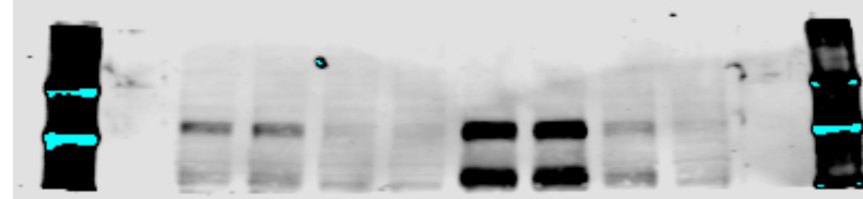

LDLR

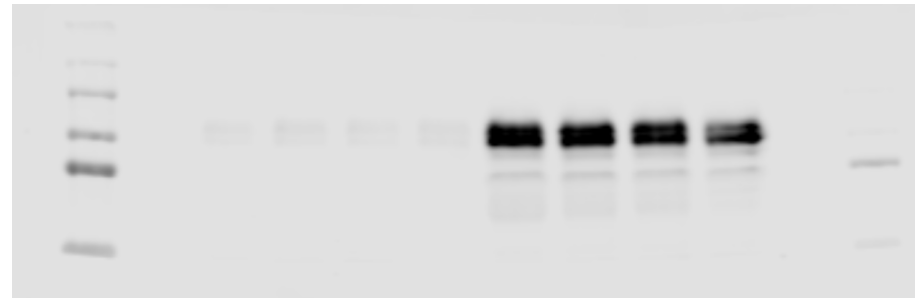

ICAM1

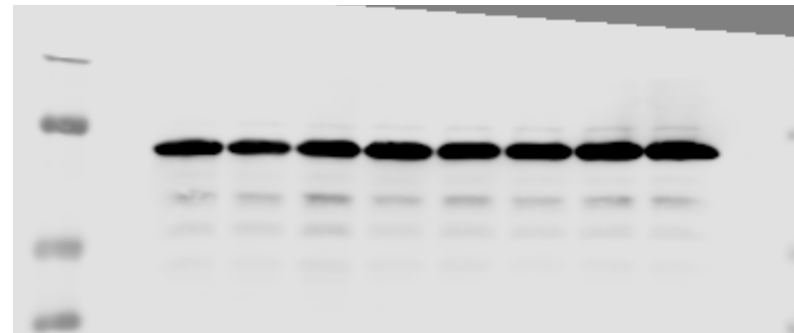

GAPDH

f.

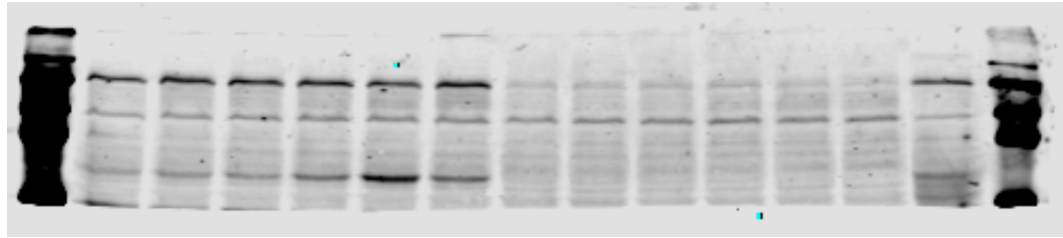

-P  
SREBP2  
-C

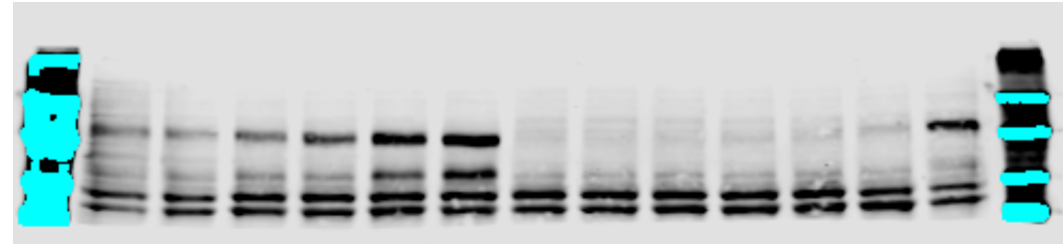

LDLR

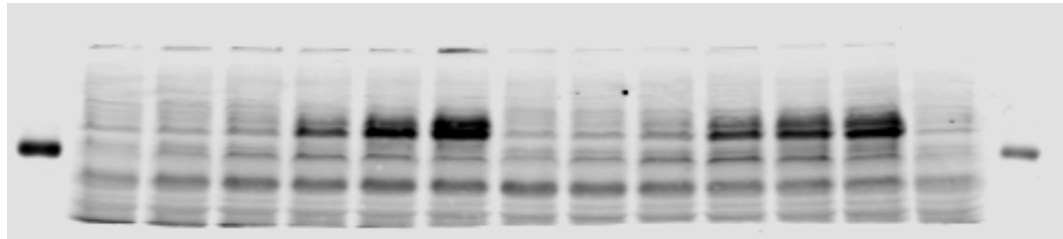

ICAM1

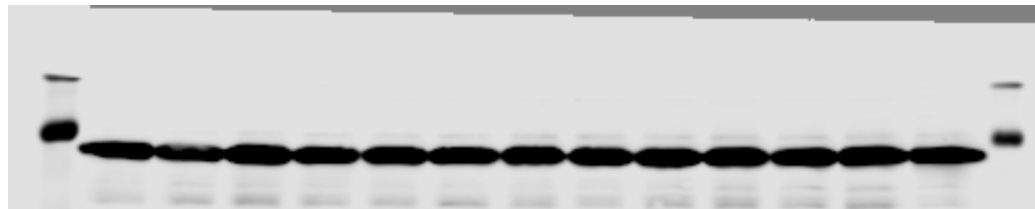

GAPDH
