# Supplementary material for: Inflammatory stress signaling via NF-kB alters accessible cholesterol to upregulate SREBP2 transcriptional activity in endothelial cells
Source: eLife journal article supplement (doi:10.7554/elife.79529), 2022-08-12
Supplement: fig5-data1 [file elife-79529-fig5-data1-v2.pdf]

**c.**

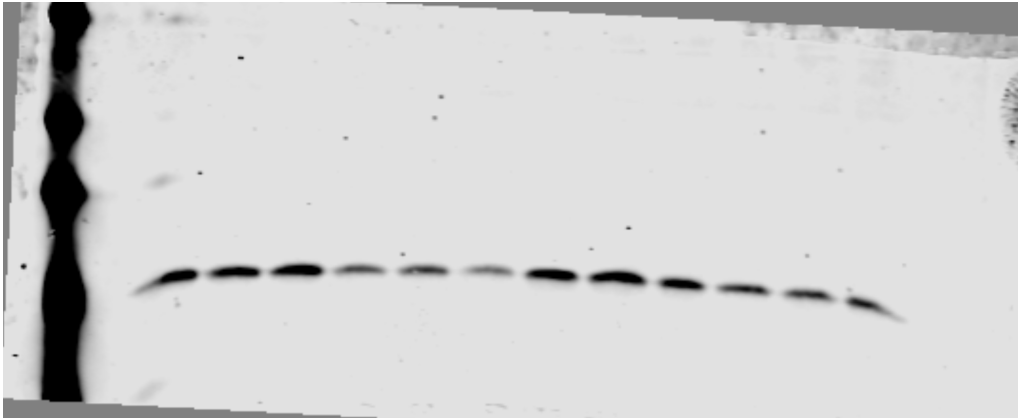

HIS (ALOD4)

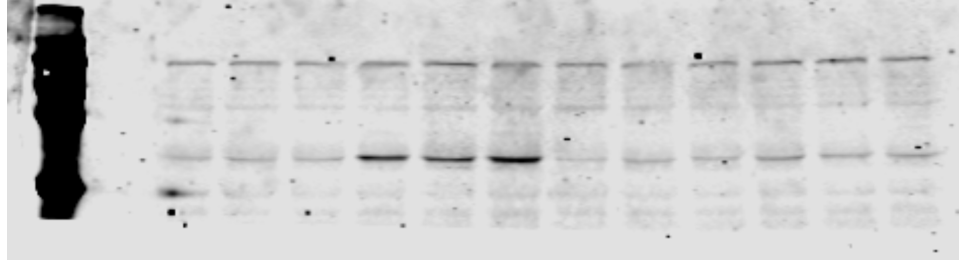

-P  
SREBP2  
-C

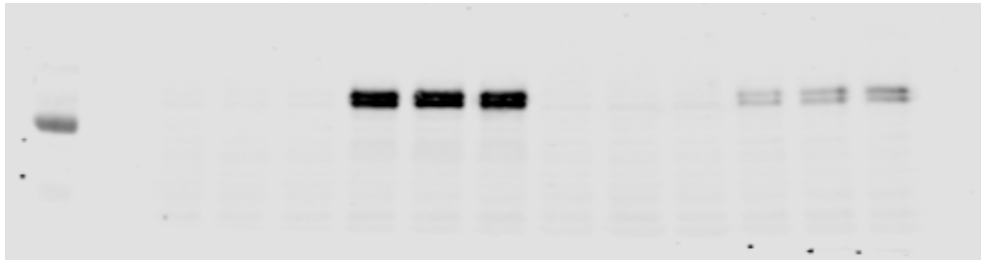

ICAM1

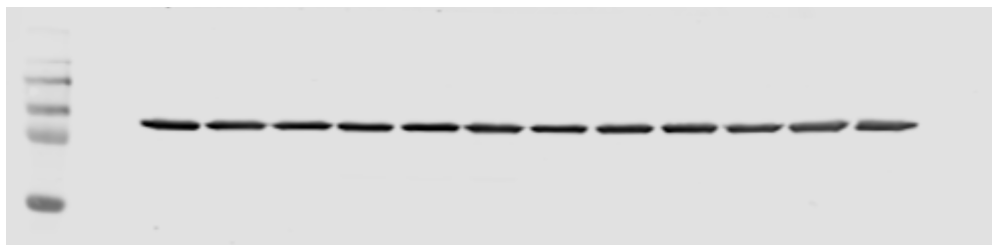

HSP90

**f.**

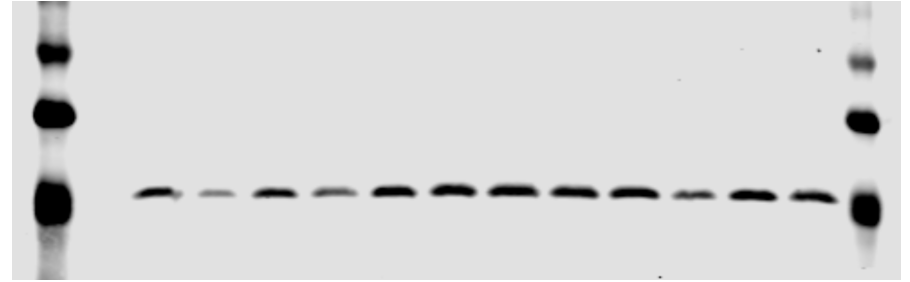

HIS  
(ALOD4)

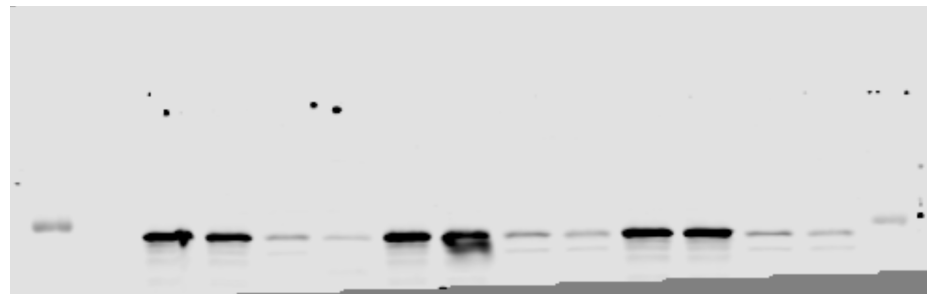

RELA

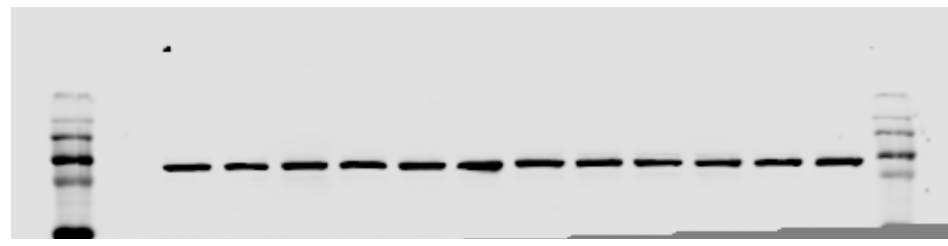

HSP90
