# Supplementary material for: Inflammatory stress signaling via NF-kB alters accessible cholesterol to upregulate SREBP2 transcriptional activity in endothelial cells
Source: eLife journal article supplement (doi:10.7554/elife.79529), 2022-08-12
Supplement: fig5-figsupp1-data1 [file elife-79529-fig5-figsupp1-data1-v2.pdf]

a.

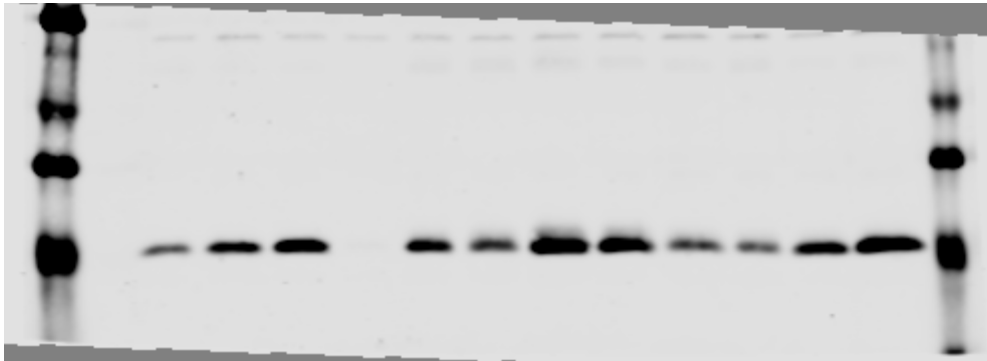

HIS  
(ALOD4)

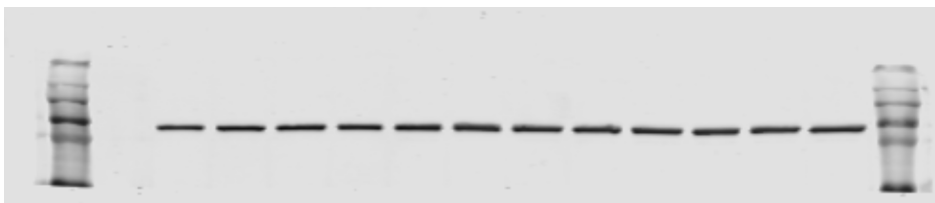

HSP90

c.

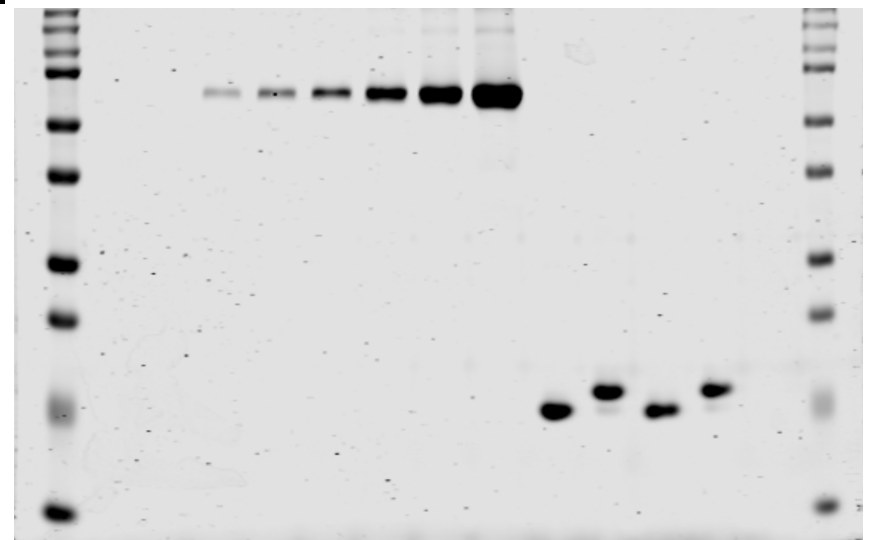

Coomassie

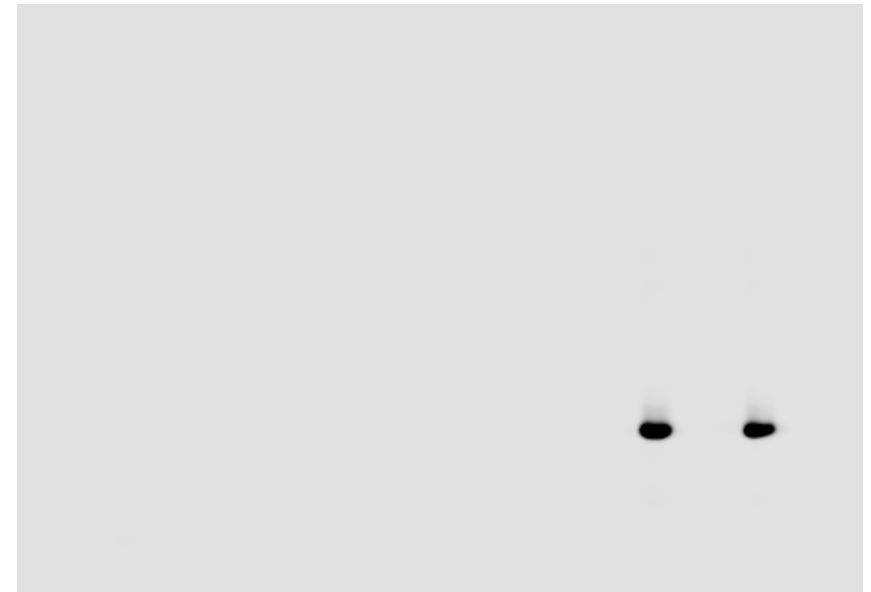

700
