# Supplementary material for: Inflammatory stress signaling via NF-kB alters accessible cholesterol to upregulate SREBP2 transcriptional activity in endothelial cells
Source: eLife journal article supplement (doi:10.7554/elife.79529), 2022-08-12
Supplement: fig6-figsupp1-data1 [file elife-79529-fig6-figsupp1-data1-v2.pdf]

c.

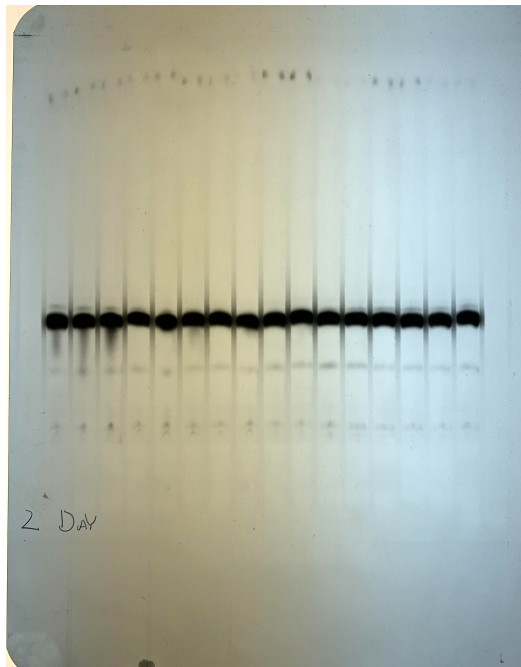

d.

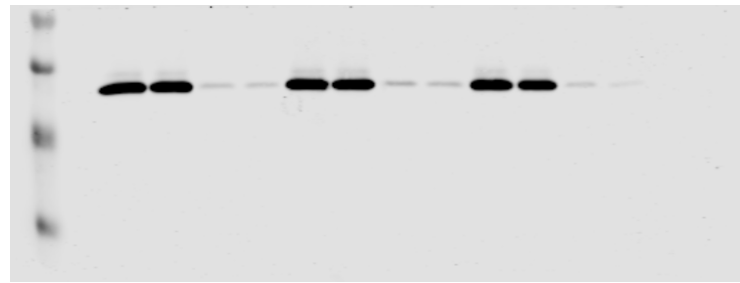

HIS  
(OlyA)

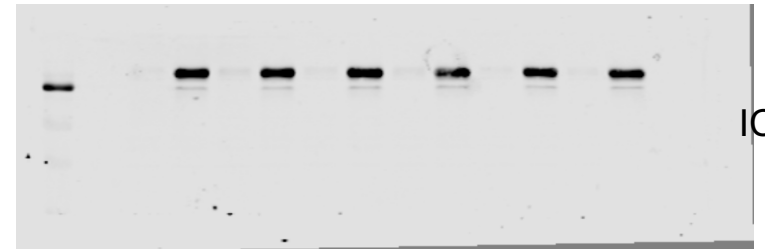

ICAM1

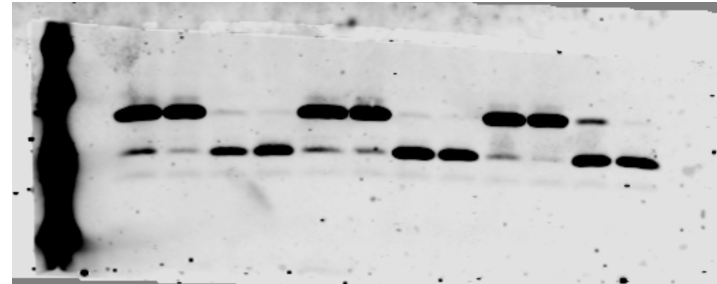

HIS  
(ALOD4)

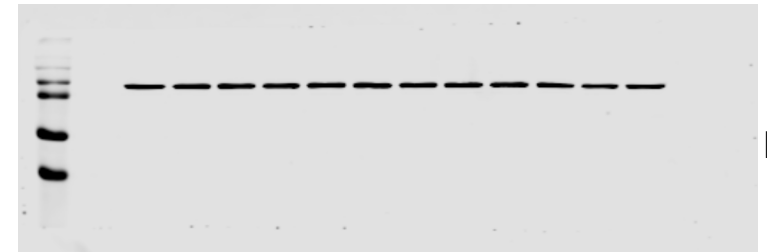

HSP90

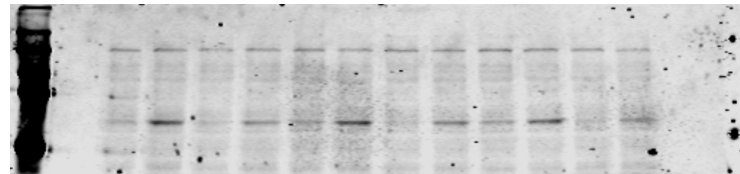

-P  
SREBP2  
-C

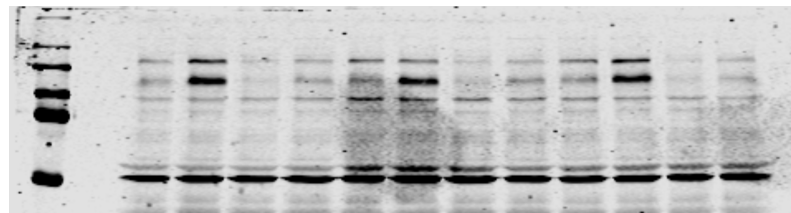

LDLR

f.

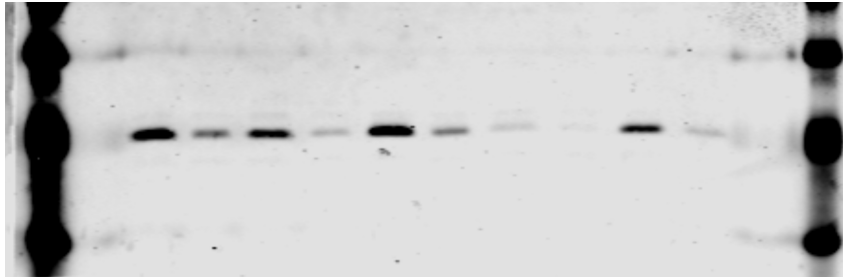

HIS (ALOD4)

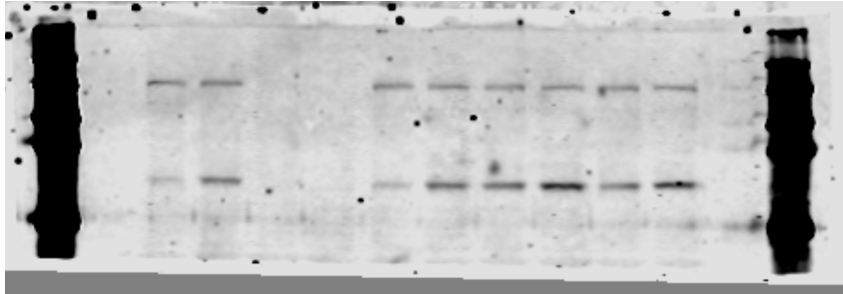

-P  
SREBP2  
-C

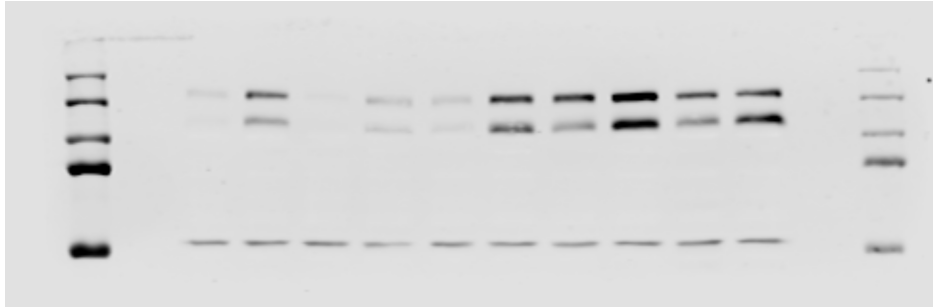

LDLR

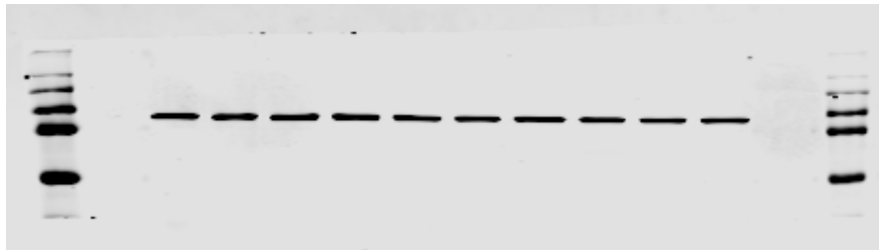

HSP90

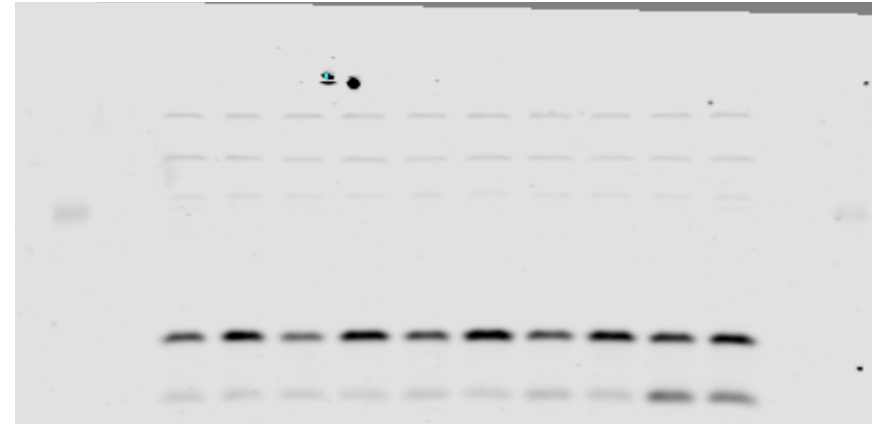

LC3b
