# Supplementary material for: Inflammatory stress signaling via NF-kB alters accessible cholesterol to upregulate SREBP2 transcriptional activity in endothelial cells
Source: eLife journal article supplement (doi:10.7554/elife.79529), 2022-08-12

**Figure 6 – Figure Supplement 3.**

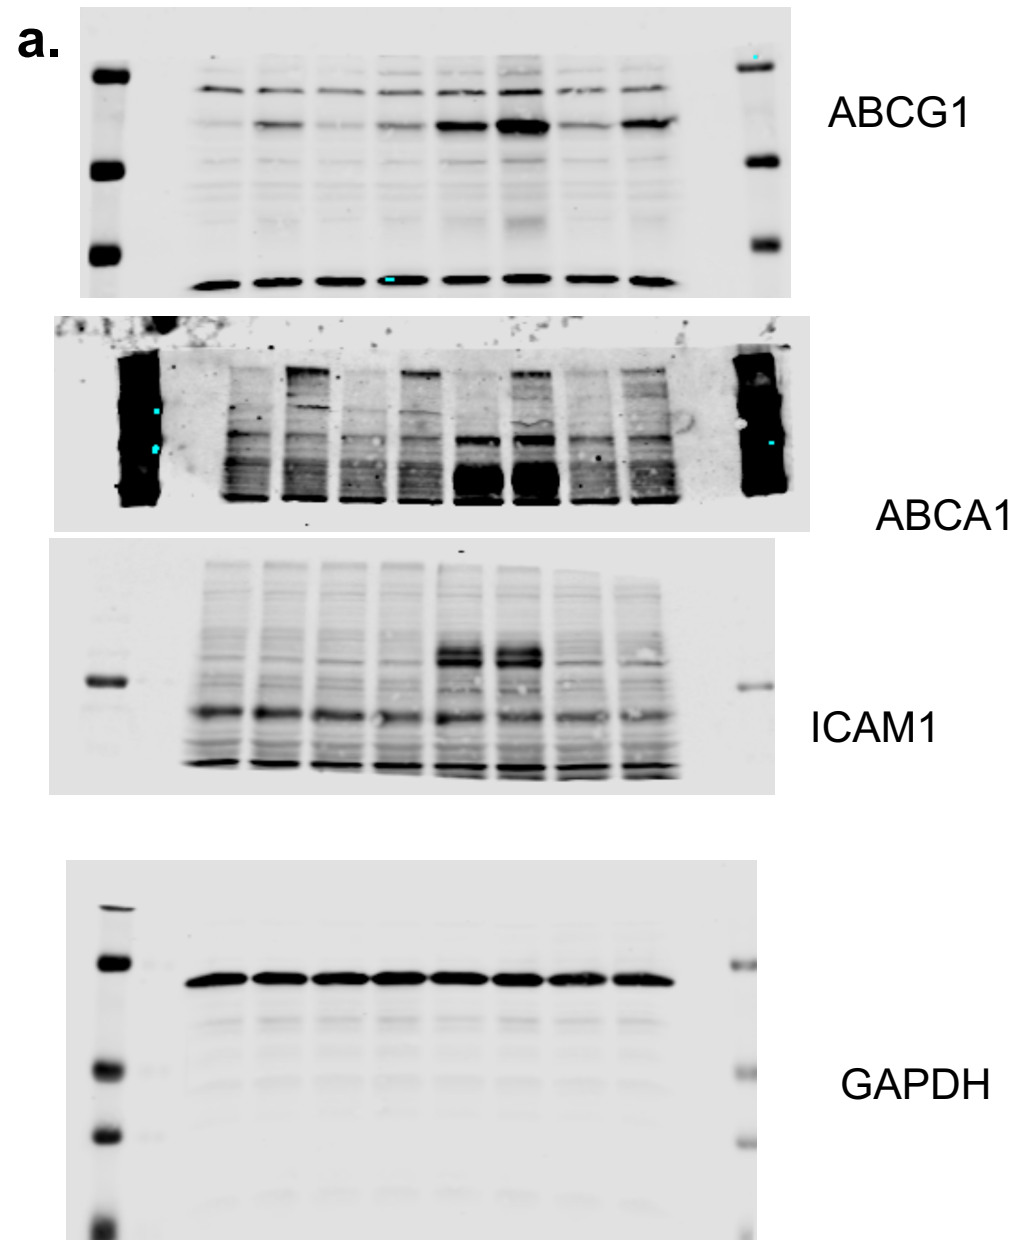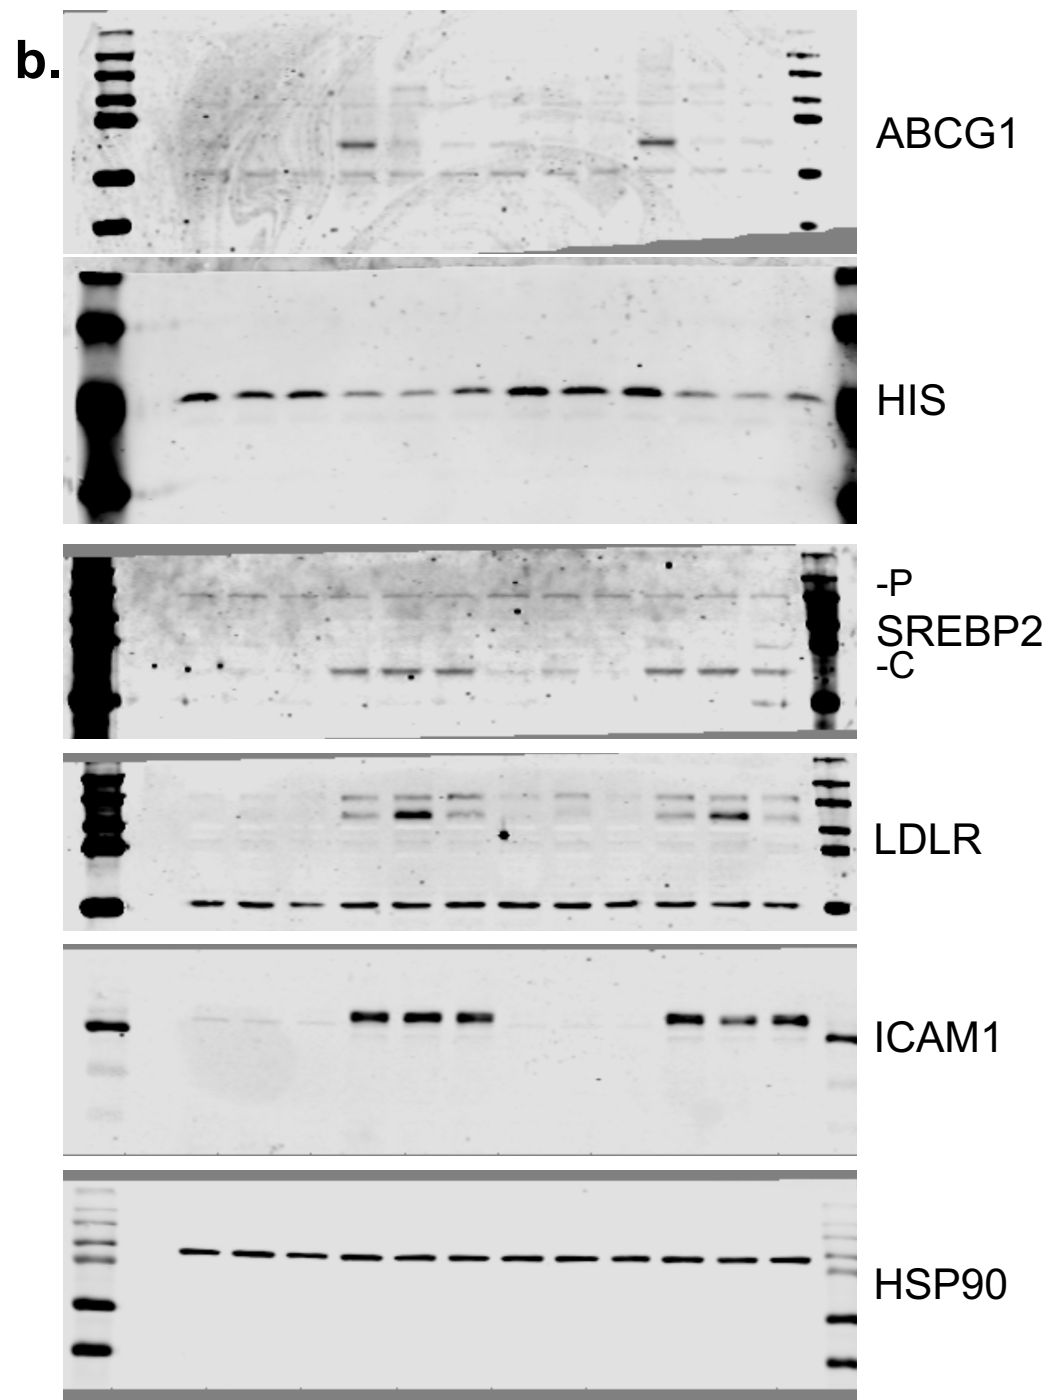

Supplement: fig6-figsupp3-data1 [file elife-79529-fig6-figsupp3-data1-v2.pdf]
