# Supplementary material for: Inflammatory stress signaling via NF-kB alters accessible cholesterol to upregulate SREBP2 transcriptional activity in endothelial cells
Source: eLife. 2022 Aug 12;11:e79529. doi: 10.7554/eLife.79529 (PMC9395194; doi:10.7554/eLife.79529)
Supplement: Figure 2—source data 2. [file elife-79529-fig2-data2.xlsx]

## Sheet: Fig. 2a
Time (hr)	Fold Change (SREBP2C/HSP90, norm to time 0)
0	1	1	1
0.16	1.14381	0.819546	1.03632
0.5	0.964194	0.974282	1.0795
1	1.1675	1.20453	1.25296
2	1.22757	0.869232	1.15097
3	0.987519	0.868643	1.12196
4	1.73855	0.972852	1.0908
6	2.11565	1.46627	1.88999
8	2.40354	2.08838	2.03753
10	2.13963	2.47414	2.24824
16	1.3001	1.03197	1.36663

## Sheet: Fig. 2b
ICAM1
Time (hr)	Fold Change (ICAM1/GAPDH, norm to time 0)
0	0.892022	1.10798	1.03893	0.96107	1.12685	0.873151
0.16	1.12843	1.25219	0.814953	1.0179	1.41608	1.251
0.5	10.2704	13.4295	13.3293	15.0894	20.9105	17.7919
1	60.122	66.0135	55.3809	46.9721	77.3934	69.7813
2	98.9429	102.868	132.076	146.209	124.608	117.183
3	133.989	141.95	119.228	116.57	167.577	164.745
4	184.327	189.654	169.792	138.084	237.175	210.969
6	145.73	149.633	146.742	152.775	154.468	145.201
8	133.314	144.719	222.133	186.607	186.702	153.529
10	128.538	141.268	134.266	142.366	133.478	166.522
16	93.3565	112.764	133.074	124.261	132.539	127.983
SELE
Time (hr)	Fold Change (ICAM1/GAPDH, norm to time 0)
0	0.92572	1.07428	1.19054	0.809455	1.07293	0.927066
0.16	2.14458	2.90186	1.89986	1.42464	1.24433	1.13397
0.5	76.0575	91.633	206.381	188.099	135.059	116.389
1	263.85	292.639	608.808	519.544	659.996	417.6
2	347.192	357.912	1219.15	1282.65	617.394	639.126
3	432.908	478.422	580.67	481.94	614.75	517.023
4	246.76	273.985	507.298	453.197	502.377	434.89
6	285.547	300.51	459.244	236.688	318.303	236.993
8	314.704	324.852	700.338	643.864	343.431	318.784
10	200.567	246.292	357.148	369.727	346.919	248.132
16	116.275	123.603	140.512	125.374	64.4394	73.3512
CXCL1
Time (hr)	Fold Change (ICAM1/GAPDH, norm to time 0)
0	1.09364	0.906365	1.13117	0.868826
0.16	2.00339	1.90584	1.54784	1.34118
0.5	68.8357	61.9471	41.5152	33.864
1	99.447	85.2769	122.036	85.6209
2	58.3353	54.5811	41.0549	30.4542
3	42.0342	39.5359	33.2332	12.919
4	35.0548	31.1264	29.5221	22.5228
6	41.5477	42.8246	26.4691	25.1932
8	30.3737	24.0112	29.2972	29.0274
10	30.5556	25.6887	33.1229	31.6208
16	58.94	55.0691	26.3423	24.0682
LDLR
Time (hr)	Fold Change (ICAM1/GAPDH, norm to time 0)
0	0.933738	1.06626	1.13175	0.868253	1.12877	0.871226
0.16	1.17969	1.15274	1.03278	0.921024	1.06132	1.062
0.5	1.17816	1.46468	1.49487	1.40568	1.2565	1.20601
1	1.90461	1.9851	2.10973	1.50125	3.88547	2.40821
2	2.31821	2.01687	2.3879	1.75553	2.18885	1.75302
3	1.31935	1.603	0.920154	0.902443	1.76776	1.29539
4	1.34394	1.41422	1.54456	1.28461	2.35356	2.02972
6	2.36543	2.30485	2.12782	1.84392	2.23707	1.97664
8	3.46123	3.24781	6.27644	5.33616	4.37273	3.62341
10	3.39407	3.46383	3.89422	3.30396	4.11701	3.8001
16	2.84394	2.8739	3.17089	2.69418	2.62494	2.31713
HMGCR
Time (hr)	Fold Change (ICAM1/GAPDH, norm to time 0)
0	0.916426	1.08357	1.10989	0.890108	1.08509	0.914913
0.16	0.846034	1.01151	0.937293	0.931366	0.874408	1.01524
0.5	0.858586	0.962613	1.10982	1.12081	1.21881	0.995917
1	0.952947	1.11634	0.881851	0.89575	1.41625	1.28355
2	0.91582	0.971334	1.05907	0.897743	0.947185	0.847402
3	0.880495	1.16335	0.626455	0.660921	0.862913	0.894204
4	1.42885	1.46734	1.06077	0.940067	1.77874	1.59854
6	2.76748	2.70786	1.8345	1.5456	1.6475	1.80953
8	2.99854	3.48114	3.48891	3.11561	2.28025	2.36999
10	2.5713	2.79231	2.35947	2.40781	2.46279	1.94573
16	1.86567	1.85158	1.35225	1.27421	1.3368	1.16169
HMGCS1
Time (hr)	Fold Change (ICAM1/GAPDH, norm to time 0)
0	0.94317	1.05683	1.0684	0.931601	1.11951	0.880494
0.16	1.05484	1.17093	1.04131	0.844858	1.4189	1.0737
0.5	1.10823	1.17792	1.44213	1.41258	1.27203	1.10878
1	1.68935	1.89213	1.36242	1.25273	1.94221	1.70778
2	1.76439	1.74031	2.84469	1.57791	1.68883	1.32632
3	1.67463	2.04607	1.55164	1.28199	1.68862	1.37681
4	3.13538	3.071	2.07639	2.12327	2.86617	2.42277
6	3.68389	4.2393	3.2317	2.91109	2.94061	2.51914
8	4.73284	5.36586	3.80011	3.31457	3.97735	3.58415
10	6.109	6.55724	3.7628	2.91293	4.96837	3.83172
16	3.93544	4.11198	2.47706	2.09212	1.44443	1.26791

## Sheet: Fig. 2c
Fold Change (LDLR/HSP90, to untreated cells)
Veh.		TNF
-LDL	+LDL	-LDL	+LDL
1	0.61968	5.85534	1.8757
1	0.456789	9.53244	3.24503
1	0.624547	7.47041	2.05557
1	0.27752	8.82106	1.54128

## Sheet: Fig. 2d
Fold Change (MFI norm to untreated cells)
-LDL		+LDL
-TNF	+TNF	-TNF	+TNF
1	3.55767	0.83651	1.61585
0.988755	2.13632	0.736181	1.06267
1.01124	2.08658	0.718653	1.08453
1	3.72589	0.724873	1.87817
