# Supplementary material for: Inflammatory stress signaling via NF-kB alters accessible cholesterol to upregulate SREBP2 transcriptional activity in endothelial cells
Source: eLife. 2022 Aug 12;11:e79529. doi: 10.7554/eLife.79529 (PMC9395194; doi:10.7554/eLife.79529)
Supplement: Figure 3—source data 2. [file elife-79529-fig3-data2.xlsx]

## Sheet: Fig. 3c
SREBP2 (P)
Fold Change (SREBP2P/HSP90, to untreated cells)
Veh.		ACTD
Ctrl	TNFa	Ctrl	TNFa
1	1.35153	0.854849	1.03963
1	1.1068	0.766687	0.910196
1	1.03424	1.11589	1.26387
SREBP ©
Fold Change (SREBPC/HSP90, to untreated cells)
Veh.		ACTD
Ctrl	TNFa	Ctrl	TNFa
1	1.75509	0.927214	1.03706
1	2.0544	1.22708	1.11677
1	1.83257	0.981219	1.09348

## Sheet: Fig. 3d
SREBP2
Fold Change (SREBP2C/HSP90, to untreated cells)
Veh.			BAY117082
Ctrl	Il1b	TNFa	Ctrl	Il1b	TNFa
1	1.77457	1.91111	0.818375	0.818539	0.831273
1	2.51309	3.4871	0.90896	1.15613	0.678988
1	1.75085	2.00478	0.868155	1.00395	0.813395
LDLR
Fold Change (LDLR/HSP90, to untreated cells)
Veh.			BAY117082
Ctrl	Il1b	TNFa	Ctrl	Il1b	TNFa
1	3.48339	5.18283	1.25566	1.59617	2.36875
1	5.77635	8.30952	0.399587	0.436023	1.26012
1	6.83636	7.73896	0.554623	1.8182	0.385528

## Sheet: Fig. 3e
	Fold Change (Gene/GAPDH, norm untreated cells)
	CTRL						CTRL+BAY11-7082						TNFα						TNFα+BAY11-7082
SREBF2	0.854091	1.14591	1.2129	0.98332	0.787095	1.01668	0.56059	0.887397	1.71325	0.723689	1.12467	0.761906	1.48584	2.02076	2.98518	1.57876	2.57334	2.05628	0.619804	0.641582	2.14222	1.01883	1.05749	0.990544
LDLR	0.809276	1.19072	1.00064	0.856828	0.999363	1.14317	0.783452	0.909764	1.83299	0.94912	1.87878	0.898236	3.11286	3.44919	3.08296	1.9671	3.91941	2.30104	0.950894	1.1136	2.81579	1.09287	2.85783	1.10657
HMGCS1	0.952859	1.04714	0.986337	1.04545	1.01366	0.954551	0.958439	0.918487	0.579413	0.344418	0.547897	0.369096	4.45042	4.82764	6.38175	3.44942	6.56486	3.26816	0.742682	0.788755	0.777396	0.333598	0.887133	0.399257
HMGCR	1.00488	0.995119	1.02119	1.12642	0.978812	0.873579	0.855358	0.994005	1.74323	0.75096	1.4746	0.683888	1.93654	2.01746	4.05508	2.42527	3.22719	1.96886	0.852399	0.835755	1.52093	0.81871	1.69872	0.796233
INSIG1	0.875848	1.12415	1.02902	1.09505	0.970979	0.904946	0.800267	0.844697	0.486303	0.38368	0.424332	0.395861	4.29157	5.13625	4.15365	2.49231	4.26604	2.18533	1.1854	1.37011	0.72256	0.737502	0.884061	0.565226

## Sheet: Fig. 3f
SREBP2
Fold Change (SREBP2C/HSP90, to untreated cells)
siCTRL		siRELA
-TNF	+TNF	-TNF	+TNF
1	3.22914	1.15765	1.45231
1.03621	2.40988	0.647324	1.37855
0.920374	1.88232	1.09846	1.48679
1.04341	3.24497	1.33384	1.34494
RELA
Fold Change (RELA/HSP90, to untreated cells)
siCTRL		siRELA
-TNF	+TNF	-TNF	+TNF
1	1.24388	0.226164	0.139465
0.95377	1.47256	0.244306	0.184544
1.0072	1.32225	0.307244	0.140066
1.03903	1.49945	0.2696	0.127351
