# Supplementary material for: Inflammatory stress signaling via NF-kB alters accessible cholesterol to upregulate SREBP2 transcriptional activity in endothelial cells
Source: eLife. 2022 Aug 12;11:e79529. doi: 10.7554/eLife.79529 (PMC9395194; doi:10.7554/eLife.79529)
Supplement: Figure 4—source data 2. [file elife-79529-fig4-data2.xlsx]

## Sheet: Fig. 4g
LDL
Gene	Fold Change (Gene/GAPDH, norm untreated cells)
	CTRL						CTRL+LDL						TNFα						TNFα+LDL
SREBF2	1.01686	0.983145	1.2129	0.98332	0.787095	1.01668	0.667771	0.595983	0.523111	0.554498	0.52547	0.521212	2.52006	2.75368	2.98518	1.57876	2.05628	2.57334	1.67299	1.16242	1.20016	0.709983	1.03864	0.955977
HMGCS1	0.991654	1.00835	0.986337	1.04545	1.01366	0.954551	0.221942	0.248235	0.170501	0.115856	0.191472	0.124799	4.72483	5.47922	6.38175	3.44942	6.56486	3.26816	0.636402	0.640372	0.34538	0.263119	0.388244	0.24462
siSCAP
Gene	Fold Change (Gene/GAPDH, norm untreated cells)
	CTRL								CTRL+siSCAP								TNFα								TNFα+siSCAP
SCAP	0.75305	1.24695	1.24745	0.783044	0.879298	1.11112	1.09688	0.882205	0.0848775	0.088652	0.101197	0.0487222	0.0279431	0.0863017	0.0719636	0.0524697	0.483222	0.530136	1.06014	0.683434	0.69448	1.34084	0.679692	0.840428	0.0691788	0.0610124	0.0389154	0.047382	0.0447394	0.0128107	0.0451246	0.0227228
SREBF2	1.02068	0.979315	0.863124	1.34522	0.868465	0.959275	1.39382	0.570106	0.766914	0.41091	0.56653	0.458726	0.589812	0.629917	0.698911	0.563515	1.82326	1.67931	3.08725	2.28799	2.39095	1.96689	2.41035	1.38923	0.485225	1.36467	0.996217	1.2032	0.890628	0.801455	0.894407	0.814042
HMGCS1	1.20719	0.792806	0.982617	1.59302	0.632044	0.87872	1.42657	0.487034	0.479912	0.371475	0.475731	0.494816	0.54376	0.380904	0.486594	0.45577	5.51021	4.33985	7.67658	6.07011	8.02366	4.74256	4.78883	6.14728	0.995662	1.08327	0.997717	0.814352	0.976591	0.913276	0.728515	0.757317
25HC
Gene	Fold Change (Gene/GAPDH, norm untreated cells)
	CTRL						CTRL+LDL						TNFα						TNFα+LDL
SREBF2	0.83032	0.836494	1.72666	0.85676	0.633927	1.11583	0.294622	0.33351	0.484447	0.200504	0.358177	0.990651	1.63266	1.64911	1.6687	2.09162	2.27741	1.84817	0.222709	0.457155	0.471015	0.686432	0.463942	0.252912
HMGCS1	0.953469	0.856965	1.30835	0.894209	0.870395	1.11661	0.13636	0.129964	0.266861	0.133977	0.14682	0.210825	7.06008	7.28731	9.03278	6.01771	7.97499	7.42169	0.420453	0.366003	0.388838	0.705897	0.359416	0.40187
PF-429242
Gene	Fold Change (Gene/GAPDH, norm untreated cells)
	CTRL				CTRL+PF-429242				TNFα				TNFα+PF-429242
SREBF2	1.01686	0.983145	0.854091	1.14591	0.419763	0.636972	0.284425	0.528501	2.52006	2.75368	1.48584	2.02076	0.594211	0.671278	0.633814	0.454773
HMGCS1	0.991654	1.00835	0.952859	1.04714	0.214847	0.220269	0.330234	0.420063	4.72483	5.47922	4.45042	4.82764	0.230501	0.241567	0.603683	0.712474

## Sheet: Fig. S4a
SREBP2
Fold Change (SREBP2C/HSP90, to untreated cells)
CTRL		TNF
-LDL	+LDL	-LDL	+LDL
1	0.674553	2.31497	0.721271
0.627511	0.626066	2.59176	1.26534
1.06673	0.805417	2.5124	1.05328
1.30576	0.876506	2.73943	0.551391
LDLR
Fold Change (LDLR/HSP90, to untreated cells)
CTRL		TNF
-LDL	+LDL	-LDL	+LDL
1	0.790736	3.90123	1.34256
0.841596	0.452319	2.55041	1.04383
1.10557	0.463085	2.80872	1.09556
1.05284	0.457426	2.68469	0.898394

## Sheet: Fig. S4c
SREBP2
Fold Change (SREBP2C/HSP90, to untreated cells)
CTRL		TNF
-25HC	+25HC	-25HC	+25HC
1	0.495009	2.66221	0.54299
0.913654	0.637395	1.80081	0.459877
0.93634	0.596898	1.92848	0.476655
1.15001	0.617317	2.01668	0.531631
LDLR
Fold Change (LDLR/HSP90, to untreated cells)
CTRL		TNF
-25HC	+25HC	-25HC	+25HC
1	0.289411	3.05707	0.33783
1.08369	0.38147	4.46583	0.537698
1.07656	0.41242	3.79102	0.502647
0.839752	0.571421	4.02224	0.267543

## Sheet: Fig. S4d
SREBP2
Fold Change (SREBP2C/HSP90, to untreated cells)
CTRL		TNF
-PF429242	+PF429242	-PF429242	+PF429242
1	0.812701	1.6203	0.823807
0.770522	0.527621	4.20713	0.487124
1.17564	0.685365	4.26596	0.564195
1.05383	0.988721	5.05085	0.411804
LDLR
Fold Change (LDLR/HSP90, to untreated cells)
CTRL		TNF
-PF429242	+PF429242	-PF429242	+PF429242
1	0.296267	1.81684	0.372597
1.36959	0.248849	3.80526	0.812402
0.744665	0.254002	4.07805	0.641386
0.885742	0.33951	4.45811	0.76536

## Sheet: Fig. S4e
SREBP2
Fold Change (SREBP2C/HSP90, to untreated cells)
CTRL		TNF
-Chol	+Chol	-Chol	+Chol
0.665972	0.319066	2.97733	0.319066
0.874543	0.623888	3.14629	0.623888
1.45949	0.398542	1.79713	0.398542
LDLR
Fold Change (LDLR/HSP90, to untreated cells)
CTRL		TNF
-Chol	+Chol	-Chol	+Chol
1.06688	0.24749	3.64747	0.289588
0.865174	0.278752	2.97578	0.205169
1.06795	0.229069	2.53598	0.201009

## Sheet: Fig. S4f
SREBP2
Fold Change (SREBP2C/HSP90, to untreated cells)
CTRL		TNF
siCTRL	siSCAP	siCTRL	siSCAP
1	0.637924	1.91483	0.474179
0.93436	1.03117	2.24616	0.544613
0.970681	0.38031	3.09953	0.572389
1.09496	0.513703	3.83336	0.307143
