# Supplementary material for: Inflammatory stress signaling via NF-kB alters accessible cholesterol to upregulate SREBP2 transcriptional activity in endothelial cells
Source: eLife. 2022 Aug 12;11:e79529. doi: 10.7554/eLife.79529 (PMC9395194; doi:10.7554/eLife.79529)
Supplement: Figure 5—source data 2. [file elife-79529-fig5-data2.xlsx]

## Sheet: Fig. 5a
LPDS		FBS		Cholesterol
-TNF	+TNF	-TNF	+TNF
25.1325	26.7053	29.6553	30.0852	65.9659
22.0295	20.9727	29.6551	29.0002	75.06
21.179	21.0669	25.3125	30.4448	65.1422

## Sheet: Fig. 5c
HIS/HSP90 (norm to CTRL)
CTRL	TNFα
1	0.465
0.923496	0.465392
0.927295	0.508648
1.14921	0.35532
0.865146	0.557096
1.20308	1.07558
0.931771	0.378572

## Sheet: Fig. 5d
	CTRL						TNF
VEH	0.882414	0.823131	1.13366	1.03489	1.10641	1.01949	0.548754	0.663942	0.576174	0.744831	0.520756	0.492984
PF-429242	0.87917	0.637323	0.736338		0.841153	0.936049	0.332764	0.282776	0.257578	0.351251	0.292786	0.302174

## Sheet: Fig. 5e
	VEH						PF-429242
0	1.06547	1.16634	1.0822	0.789921	0.914286	0.981777	0.646839	0.583577	0.546952	0.580337	0.573228	0.576828
0.5	1.05485	1.0948	1.14205	0.993116	1.04657	0.825197	0.795951	0.762475	0.604274	0.657998	0.63892	0.526434
1	1.00175	1.01219	0.841665	0.887379	0.905287	0.842295	0.620922	0.71766	0.539753	0.613003	0.438245	0.584927
2	1.15213	1.06898	0.794331	0.779843	0.745107	0.867492	0.749876	0.55991	0.506997	0.484229	0.464342	0.531834
3	1.14844	0.927874	0.745377	0.669606	0.678515	0.598425	0.594916	0.506457	0.510506	0.549921	0.373453	0.439145
4	0.934443	0.775613	0.657998	0.667537	0.764904	0.756805	0.540472	0.473431	0.428706	0.369044	0.387852	0.418448
6	0.702182	0.841575	0.612373	0.47739	0.791001	0.574128	0.521845	0.391451	0.311361	0.367784	0.278065	0.309561
8	0.812778	1.03226	0.56036	0.576918	0.547132	0.487739	0.488369	0.47685	0.295073	0.263757	0.267267	0.485939

## Sheet: Fig. 5f
HIS/HSP90 (Norm to untreated)
siCTRL		siRELA
-TNF	+TNF	-TNF	+TNF
1	0.465	0.7419	0.761671
0.923496	0.465392	1.19736	0.69621
0.927295	0.508648	1.20657	0.595174
1.14921	0.35532	0.80905	0.582364
0.865146	0.557096	0.823459	1.75032
1.20308	0.378572	0.842479	0.645443
0.931771	0.410307	1.16914	1.10221
1	0.537332	0.957258	0.768998

## Sheet: Fig. 5i
MFI (Norm to untreated)
-LPS	+LPS
94.7368	83.1163
105.263	73.6733
107.719	79.4126
100.096	67.3137
106.246	93.2603
85.939	77.6472

## Sheet: Fig. S5e
MFI
BACK	LPDS	FBS	LDL	CHOL	MβCD
1.28	1523	2214	3286	4352	28.2
	1394	2341	3312	4228	43.6
	1741	2382	3413	4893	28.2

## Sheet: Fig. S5f
MFI
CTRL	+TNFα
918	529
1099	516
1121	524

## Sheet: Fig. S5g
TNF (hr)	0	2	6
	1.3	160.8	1.55
	0	360.81	5.1
	0	200.52	8.08
	0.39	80.03	3.61
	0.31	10	4.74
	0	10	12.75

## Sheet: Fig. S5h
	-LPS	+LPS
	178.134	172.626
	156.102	161.61
	171.937	192.592
	176.757	187.773
	175.38	179.511
	132.004	140.266
