# Supplementary material for: Inflammatory stress signaling via NF-kB alters accessible cholesterol to upregulate SREBP2 transcriptional activity in endothelial cells
Source: eLife. 2022 Aug 12;11:e79529. doi: 10.7554/eLife.79529 (PMC9395194; doi:10.7554/eLife.79529)
Supplement: Figure 6—source data 2. [file elife-79529-fig6-data2.xlsx]

## Sheet: Fig. 6c
Fold Change (Protein/HSP90 norm to untreated)
STARD10
siCTRL		siRELA		siSTARD10
CTRL	TNF	CTRL	TNF	CTRL	TNF
1	2.48827	1.54895	1.50936	0.494003	0.682996
1	1.65159	1.19375	0.990644	0.259591	0.214086
1	1.89277	1.04503	1.20429	0.332393	0.382733
1	1.97117	1.08834	1.14952	0.292832	0.101362

## Sheet: Fig. 6d
Fold Change (Gene/GAPDH norm to untreated)
STARD10
Veh.			TNF
CTRL	#1	#2	CTRL	#1	#2
1.20529	0.387071	1.13624	6.71467	0.777512	0.515604
0.794714	0.320701	1.13223	5.21087	0.957991	0.686297
1.03147	0.176168	0.0792334	3.66539	0.336327	0.0941473
1.045	0.145064	0.0928433	4.47542	0.370942	0.237224
0.923526	0.100556	0.0899675	4.08431	0.295923	0.0994549
HMGCS1
Veh.			TNF
CTRL	#1	#2	CTRL	#1	#2
0.835446	0.339119	0.54637	4.78268	1.03918	1.51751
1.16455	0.369346	0.53102	5.30172	1.37972	1.80537
0.942508	0.548759	0.640212	3.60266	1.39444	1.49534
0.532244	0.45602	0.728242	3.17003	1.53628	1.75647
1.52525	0.319276	0.782372	3.39858	1.25638	1.46693
HMGCR
Veh.			TNF
CTRL	#1	#2	CTRL	#1	#2
1.12687	0.647428	0.62648	2.66768	0.932946	1.27923
0.873134	0.706453	0.555312	2.55581	0.90137	1.41403
1.0023	0.690905	0.971949	1.69269	1.52705	1.18091
0.937669	0.717379	0.834166	2.81761	1.3252	1.73282
1.06003	0.554099	0.789424	1.8962	0.937671	0.894938
LDLR
Veh.			TNF
CTRL	#1	#2	CTRL	#1	#2
1.0381	1.34829	1.70323	6.72074	4.12021	4.98277
0.9619	1.32976	1.21888	4.55572	3.73129	4.31168
0.710207	1.55039	0.649245	6.76472	1.76269	0.463811
0.985604	1.8282	1.11459	5.86137	0.831222	0.639694
1.30419	0.352044	0.801454	2.17337	0.848008	0.730505

## Sheet: Fig. 6e
Fold Change (Protein/HSP90 norm to untreated)
HIS
siCTRL		siSTARD10
-TNF	+TNF	-TNF	+TNF
0.888002	0.460204	1.83706	1.16529
0.840416	0.725256	1.84103	1.45726
1.27158	0.655853	1.91448	1.45659
SREBP2C
siCTRL		siSTARD10
-TNF	+TNF	-TNF	+TNF
1.3094	2.82558	0.933918	1.71904
0.951987	2.01906	0.980609	1.37913
0.738613	2.09158	1.01116	1.76317
LDLR
siCTRL		siSTARD10
-TNF	+TNF	-TNF	+TNF
1.13578	5.30301	0.833553	1.8892
0.857934	4.18735	1.00254	1.85745
1.00629	4.19386	1.09955	2.77136

## Sheet: Fig. S6c
CE/FC
OA	ACATi	CTRL	TNFα
3.00686	0.294958	1.55141	0.493358
2.38448	0.585208	1.1776	0.598122
2.67051	0.247996	0.738435	0.642146
1.85836	0.0624823	1.01854	0.710861

## Sheet: Fig. S6e
3H Sup/Lysate
	Veh.			TNFα			TO90
BSA	2.31873	2.61612	3.70727	3.41071	3.1504	2.75061	4.18772	4.22838	3.27201
HDL	11.7414	12.2578	13.0015	12.4594	12.4838	11.5234	18.0704	16.7095	15.1447
LPDS	7.17651	9.00999	7.70928	8.52979	7.10308	7.49703	10.2338	9.58616	9.50873
FBS	18.4704	18.2439	17.7819	16.9833	16.2175	16.3136	22.5036	21.4521	21.3514

## Sheet: Fig. S36c
Fold Change (Gene/GAPDH norm to untreated)
ABCG1
Veh.			TNF
CTRL	#1	#2	CTRL	#1	#2
0.98192	0.16383	0.0515867	10.4815	1.59998	2.69368
1.01808	0.187902	0.529066	11.194	1.48341	2.95869
HMGCS1
Veh.			TNF
CTRL	#1	#2	CTRL	#1	#2
1.16541	1.12599	0.886439	4.69332	3.53916	3.42452
0.834595	0.866505	0.630363	4.48617	3.09076	4.49096
HMGCR
Veh.			TNF
CTRL	#1	#2	CTRL	#1	#2
0.812017	0.743501	0.653663	2.99648	1.83711	2.89661
1.18798	0.93653	1.03856	3.22895	2.24058	2.98333
LDLR
Veh.			TNF
CTRL	#1	#2	CTRL	#1	#2
0.812017	0.743501	0.653663	2.99648	1.83711	2.89661
1.18798	0.93653	1.03856	3.22895	2.24058	2.98333
