# Supplementary material for: Inflammatory stress signaling via NF-kB alters accessible cholesterol to upregulate SREBP2 transcriptional activity in endothelial cells
Source: eLife journal article supplement (doi:10.7554/elife.79529), 2022-08-12
Supplement: supp [file elife_poa_e79529_Figure_3_source_data_1.pdf › elife_poa_e79529_Figure_3_source_data_1.pdf]

a.

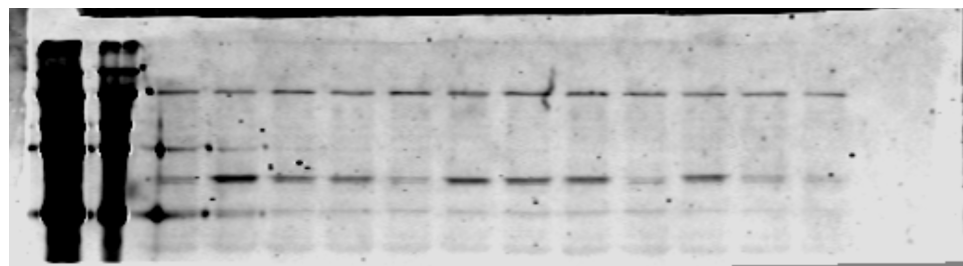

-P  
SREBP2  
-C

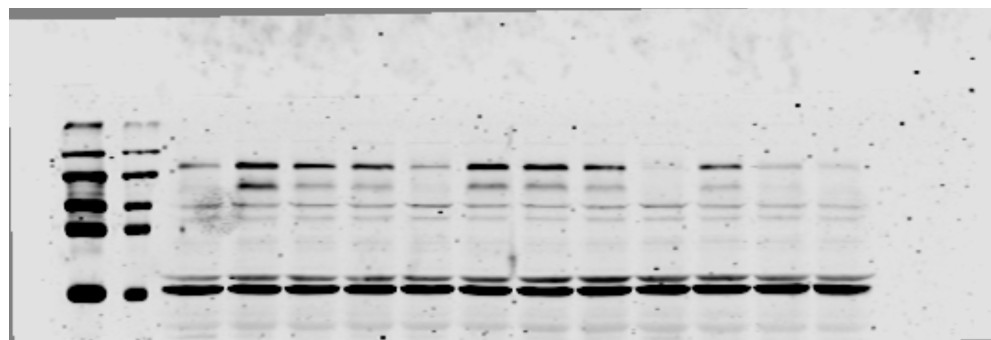

LDLR

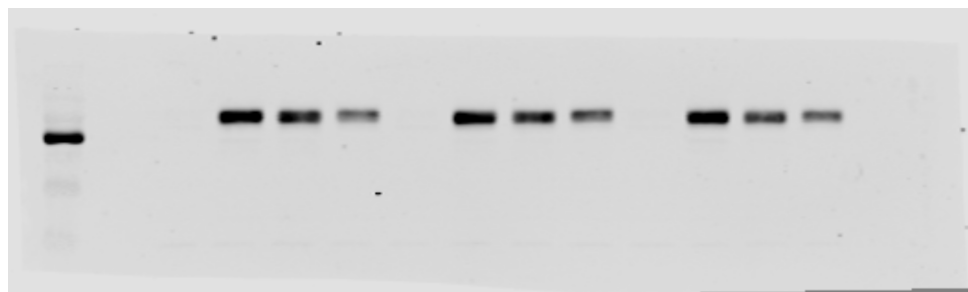

ICAM1

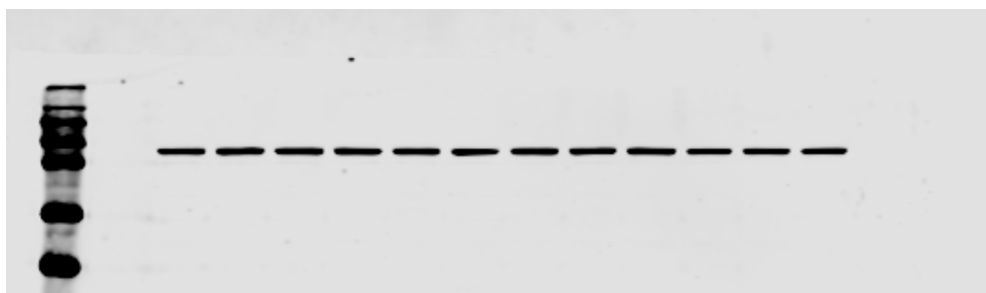

HSP90

b.

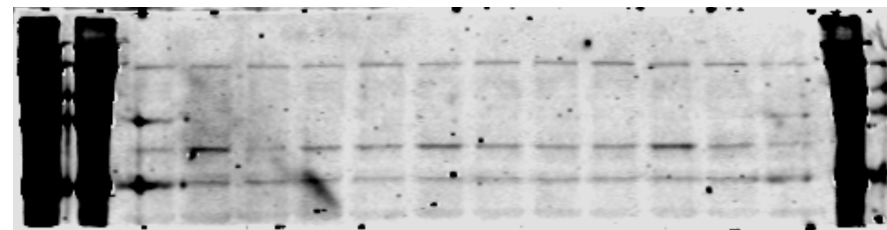

-P  
SREBP2  
-C

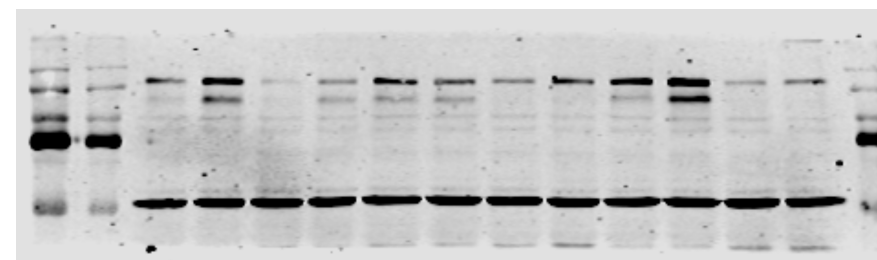

LDLR

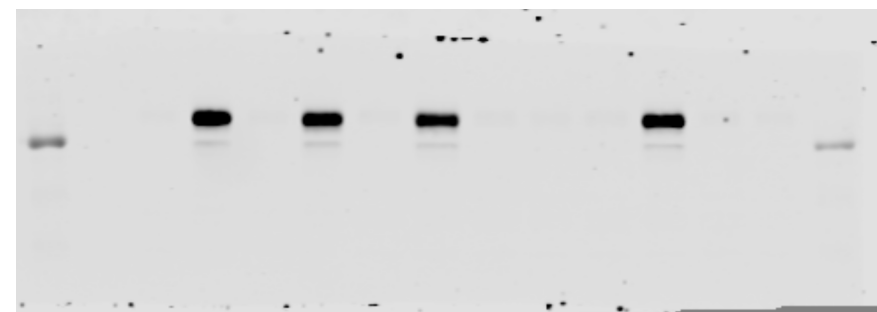

ICAM1

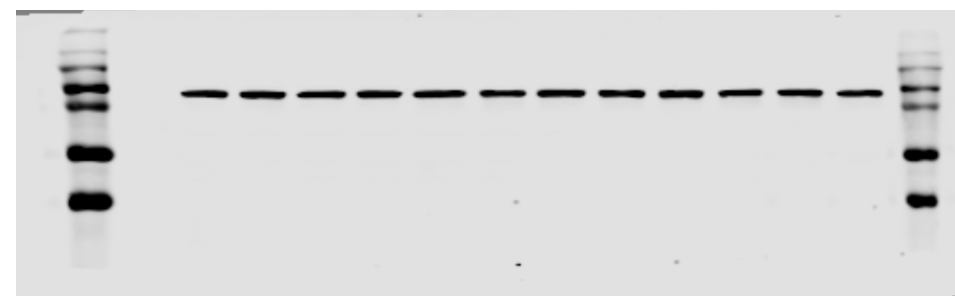

HSP90

C.

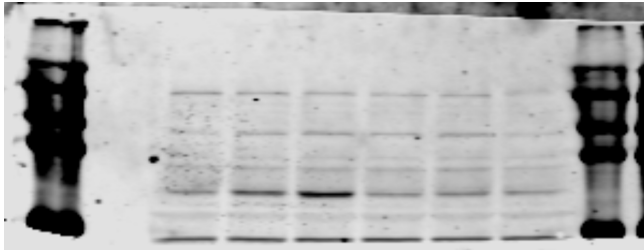

-P  
SREBP2  
-C

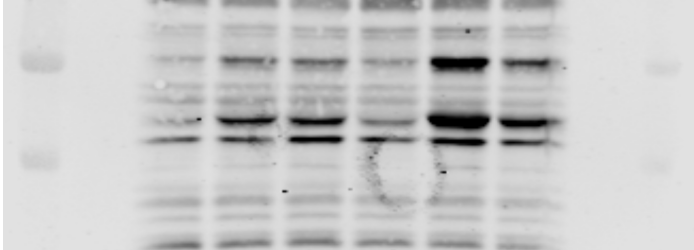

p-JNK1

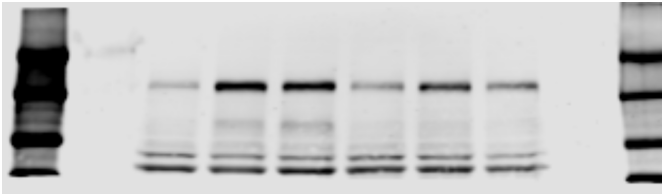

LDLR

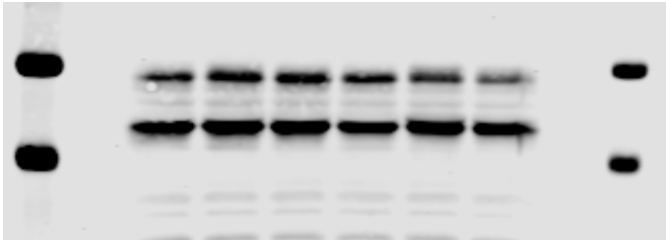

t-JNK1

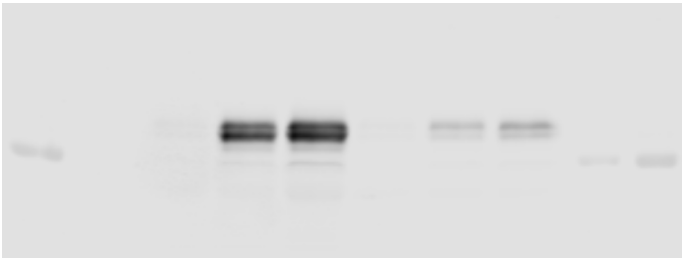

ICAM1

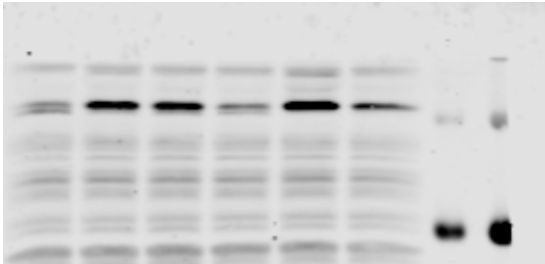

p-p38

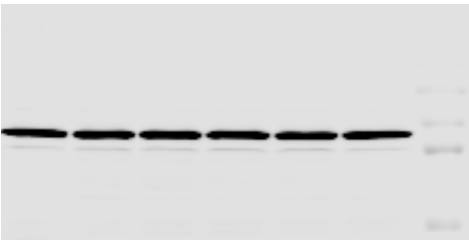

HSP90

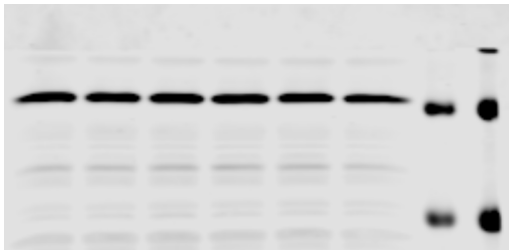

t-p38

e.

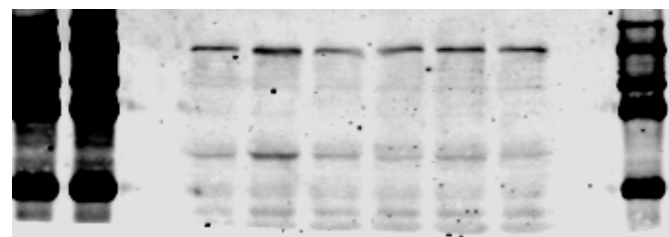

-P

-C

SREBP2

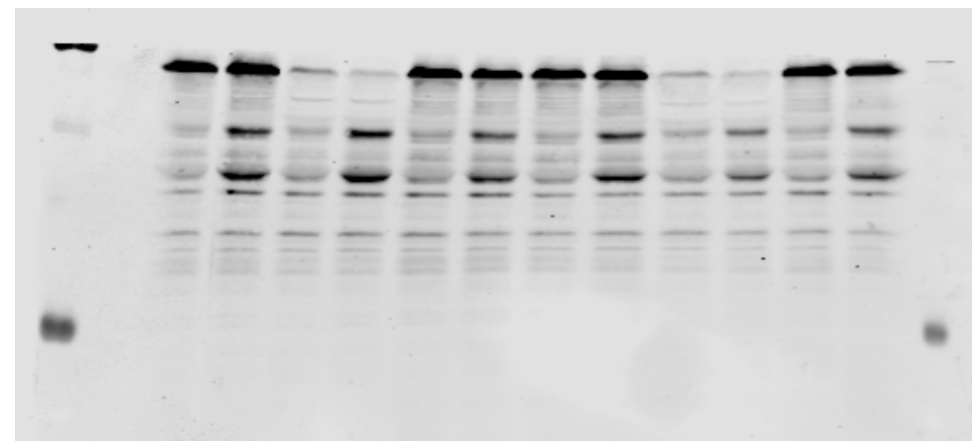

p-JNK1

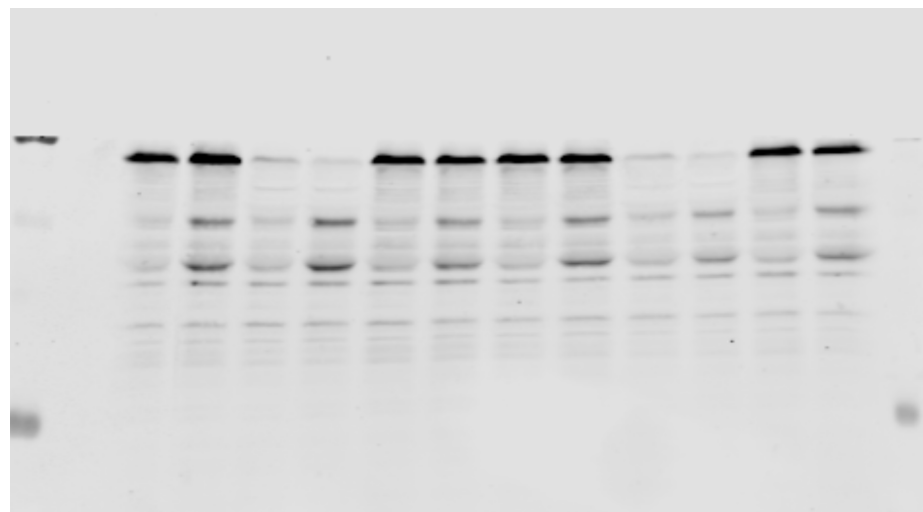

RELA

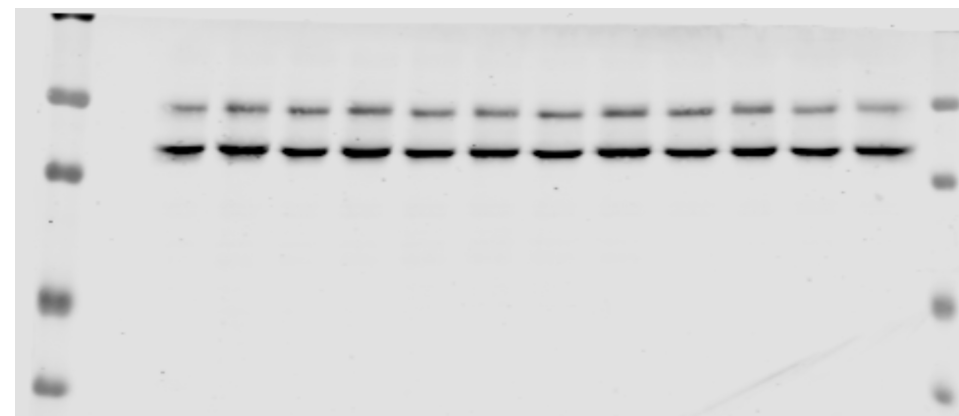

t-JNK1

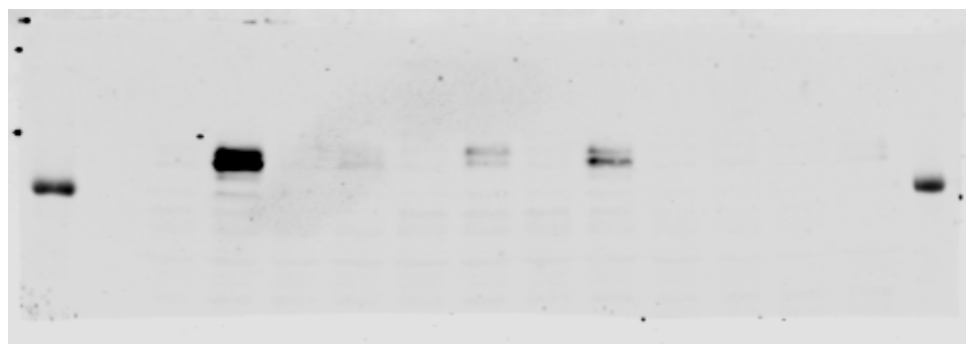

ICAM1

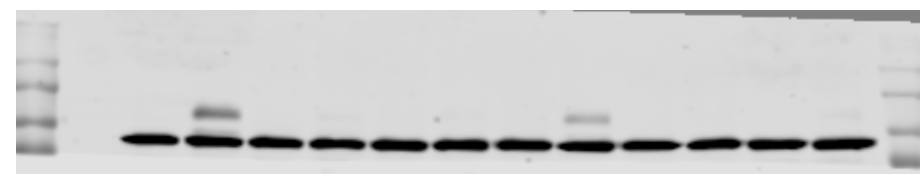

HSP90
