# Supplementary material for: Inflammatory stress signaling via NF-kB alters accessible cholesterol to upregulate SREBP2 transcriptional activity in endothelial cells
Source: eLife. 2022 Aug 12;11:e79529. doi: 10.7554/eLife.79529 (PMC9395194; doi:10.7554/eLife.79529)
Supplement: Supplementary file 1. — (RNA-seq) HUVEC were treated with TNFα for 0, 4, and 10 hr and with or without siRNA targeting RELA. (Lipidomics). HUVEC were treated with TNFα for 0, 4, and 10 hr. Data represented as molar percentage of lipid [file elife-79529-supp1.xlsx]

## Sheet: RNAseq
siRNA	siCTRL									siRELA
TNF	0			4			10			0			4			10
Rep	A	B	C	A	B	C	A	B	C	A	B	C	A	B	C	A	B	C
7SK	0.773585	1.17948	0.497847	0.199893	0.298577	0.191777	0.431184	0.312208	0.241105	0.856345	1.04459	0.614117	0.508453	0.0001	0.343653	0.829716	0.400729	0.328289
7SK	0.773585	1.17948	0.497847	0.199893	0.298577	0.191777	0.431184	0.312208	0.241105	0.856345	1.04459	0.614117	0.508453	0.0001	0.343653	0.829716	0.400729	0.328289
7SK	0.773585	1.17948	0.497847	0.199893	0.298577	0.191777	0.431184	0.312208	0.241105	0.856345	1.04459	0.614117	0.508453	0.0001	0.343653	0.829716	0.400729	0.328289
7SK	0.773585	1.17948	0.497847	0.199893	0.298577	0.191777	0.431184	0.312208	0.241105	0.856345	1.04459	0.614117	0.508453	0.0001	0.343653	0.829716	0.400729	0.328289
7SK	0.773585	1.17948	0.497847	0.199893	0.298577	0.191777	0.431184	0.312208	0.241105	0.856345	1.04459	0.614117	0.508453	0.0001	0.343653	0.829716	0.400729	0.328289
7SK	0.773585	1.17948	0.497847	0.199893	0.298577	0.191777	0.431184	0.312208	0.241105	0.856345	1.04459	0.614117	0.508453	0.0001	0.343653	0.829716	0.400729	0.328289
7SK	0.773585	1.17948	0.497847	0.199893	0.298577	0.191777	0.431184	0.312208	0.241105	0.856345	1.04459	0.614117	0.508453	0.0001	0.343653	0.829716	0.400729	0.328289
7SK	0.773585	1.17948	0.497847	0.199893	0.298577	0.191777	0.431184	0.312208	0.241105	0.856345	1.04459	0.614117	0.508453	0.0001	0.343653	0.829716	0.400729	0.328289
7SK	0.773585	1.17948	0.497847	0.199893	0.298577	0.191777	0.431184	0.312208	0.241105	0.856345	1.04459	0.614117	0.508453	0.0001	0.343653	0.829716	0.400729	0.328289
7SK	0.773585	1.17948	0.497847	0.199893	0.298577	0.191777	0.431184	0.312208	0.241105	0.856345	1.04459	0.614117	0.508453	0.0001	0.343653	0.829716	0.400729	0.328289
7SK	0.773585	1.17948	0.497847	0.199893	0.298577	0.191777	0.431184	0.312208	0.241105	0.856345	1.04459	0.614117	0.508453	0.0001	0.343653	0.829716	0.400729	0.328289
7SK	0.773585	1.17948	0.497847	0.199893	0.298577	0.191777	0.431184	0.312208	0.241105	0.856345	1.04459	0.614117	0.508453	0.0001	0.343653	0.829716	0.400729	0.328289
A1BG	0.773585	0.58979	0.248973	0.110407	0.298577	0.159827	0.0995808	0.26018	0.218152	0.0390202	0.61356	0.122903	0.0392041	0.0001	0.0001	0.0001	0.100257	0.109496
A1BG-AS1	1.48603	1.17948	1.44321	0.176027	1.04477	0.684471	0.473167	0.395917	0.799658	0.492233	1.50935	0.73692	0.390823	0.247717	0.639604	0.225474	0.248576	1.38092
A2M	2.65205	0.982916	1.30669	1.65471	1.19401	0.766788	1.16167	0.624293	0.688686	24.2141	31.6056	31.2886	17.6751	16.5905	18.3802	11.0221	10.0158	12.2525
A2M-AS1	0.718336	0.58979	0.871157	0.147176	0.149338	0.223717	0.0986243	0.156148	0.252581	1.2767	2.03074	0.517635	0.352037	0.247717	0.687206	0.177875	0.200414	0.437685
A4GALT	9.33717	16.708	16.6124	51.3672	76.5592	64.8169	29.0484	46.4507	41.4197	11.1312	16.3377	19.6486	20.0605	32.9332	29.8892	15.1702	22.7358	27.8961
AAAS	25.4146	23.9808	24.0786	17.2448	12.2376	14.5033	16.8124	14.4086	15.1605	16.6969	15.102	12.7716	10.1672	11.3905	9.27603	10.6666	12.5198	9.84575
AACS	22.155	20.4427	22.0876	12.0971	17.6102	16.7394	20.9574	21.3527	23.0448	14.2838	13.3173	16.0873	10.5973	6.68577	11.8527	14.1628	14.6231	18.1599
AADAC	0.0001	0.196663	0.248973	0.0001	0.0001	0.0320453	0.0001	0.0001	0.0574821	0.0001	0.549261	0.0001	0.117412	0.0001	0.171876	0.0001	0.601043	0.0001
AADAT	0.442091	0.786353	1.86665	0.514867	1.49248	0.798734	0.298542	0.962397	1.04445	1.05095	1.92216	1.47374	0.664869	0.742952	0.343653	1.36304	1.70277	0.765873
AAED1	12.2101	16.3149	12.9415	7.31714	7.90973	7.57114	8.02489	7.90654	8.43524	13.739	13.0427	13.7541	10.2063	5.44768	9.27602	10.1925	6.51032	9.84576
AAGAB	38.1219	38.723	38.8866	38.7913	40.2944	39.7721	43.3077	47.6726	46.9161	21.8344	24.8496	24.6836	26.9428	31.4475	28.3432	33.8365	38.8611	34.0223
AAK1	31.3775	18.9219	23.4369	27.411	16.5879	18.8826	19.4565	19.6719	17.3031	26.5616	21.9119	22.4558	30.7755	31.1347	29.1441	30.6509	22.7253	22.8354
AAMDC	10.7736	8.25576	9.45729	11.7791	8.9544	8.30588	8.68808	8.4007	6.71676	8.87391	7.96294	7.61391	8.83762	5.20006	6.5276	8.35552	6.10969	6.23568
AAMP	54.3651	55.4309	49.5258	41.402	47.6071	50.0265	53.2223	52.7964	50.7144	51.725	46.6788	47.6478	58.3042	49.5236	48.4411	49.8956	54.2853	45.6183
AANAT	0.0001	0.0001	0.0001	0.0736381	0.0001	0.0001	0.132741	0.0001	0.0345293	0.0001	0.0001	0.245707	0.117412	0.0001	0.0001	0.0001	0.100257	0.218892
AAR2	29.5582	26.5362	24.1409	22.3926	28.9523	25.3006	30.1428	31.3916	32.8113	15.8017	13.7291	13.9997	18.1053	15.6	16.3189	16.3554	18.6293	20.4572
AARS	107.072	97.299	88.1014	109.682	118.048	99.0304	146.171	156.334	137.166	68.9277	74.5487	71.3489	89.1182	87.409	78.6737	58.7843	57.7908	50.213
AARS2	13.0388	10.6145	10.1417	9.56005	11.9392	9.00869	12.0373	13.6803	11.7634	10.0804	9.33584	8.59634	9.97164	10.1524	11.1656	11.7332	13.8218	12.4713
AARSD1	10.9085	11.0076	11.184	8.56135	10.8945	8.43367	9.52588	10.1088	9.35881	9.12014	9.13165	8.22793	9.93253	11.3905	8.58891	8.55437	11.1176	11.9243
AASDH	9.55816	13.9561	10.1417	6.25083	6.56659	5.94193	9.45077	8.99888	7.78114	10.0804	10.2969	10.4384	5.90481	3.21912	5.32517	7.8222	7.5119	6.45447
AASDHPPT	44.1441	53.6618	50.21	23.091	36.1158	31.0512	37.073	36.9831	36.2302	44.7177	47.2278	54.2791	50.8746	44.3236	43.116	43.2587	46.6734	47.5874
AASS	23.3704	28.5018	30.6738	20.5172	21.1919	21.0202	16.4808	20.1303	18.9821	26.6215	30.204	32.0517	20.3733	20.5523	19.0673	19.7331	14.8234	14.5498
AATF	42.2103	42.0646	36.0245	45.2996	39.2498	31.3704	34.951	39.5323	37.0805	25.2204	27.4582	27.1396	34.92	45.3141	35.5578	30.3996	38.6608	34.2411
AATK	1.04983	0.982916	1.43112	0.698712	0.597053	0.798734	1.22703	1.29101	1.25103	2.49099	2.33403	1.10533	1.25143	0.247717	0.687206	1.00749	0.701201	1.53165
AB019441.29	37.1902	28.8329	24.5194	30.4841	24.9014	26.4578	26.1909	28.805	22.706	24.9963	31.1604	15.9358	19.3392	26.7155	19.1103	18.61	26.3754	17.037
AB019441.29	37.1902	28.8329	24.5194	30.4841	24.9014	26.4578	26.1909	28.805	22.706	24.9963	31.1604	15.9358	19.3392	26.7155	19.1103	18.61	26.3754	17.037
ABAT	9.50291	12.187	5.4131	2.68424	1.9402	1.62931	5.80315	6.51013	4.98088	10.781	10.0223	3.43859	2.69828	3.96198	2.23319	4.56299	4.30686	2.735
ABC7-42389800N19.1	5.395	10.1855	5.85713	4.85301	5.01049	4.229	4.77684	6.53045	6.15729	5.53349	7.19111	6.70758	3.18699	4.81101	6.04356	4.92241	5.74993	5.93453
ABC7-42389800N19.1	5.395	10.1855	5.85713	4.85301	5.01049	4.229	4.77684	6.53045	6.15729	5.53349	7.19111	6.70758	3.18699	4.81101	6.04356	4.92241	5.74993	5.93453
ABC7-42389800N19.1	5.395	10.1855	5.85713	4.85301	5.01049	4.229	4.77684	6.53045	6.15729	5.53349	7.19111	6.70758	3.18699	4.81101	6.04356	4.92241	5.74993	5.93453
ABC7-43041300I9.1	0.732075	0.000304716	0.0001	0.000196094	0.485806	0.0001	0.319452	0.592855	0.000100003	0.386223	0.23643	0.0001	0.00209891	0.344544	0.0001	0.23412	1.46647	0.136424
ABC7-43041300I9.1	0.732075	0.000304716	0.0001	0.000196094	0.485806	0.0001	0.319452	0.592855	0.000100003	0.386223	0.23643	0.0001	0.00209891	0.344544	0.0001	0.23412	1.46647	0.136424
ABCA1	34.4202	20.2461	25.6963	15.6269	12.8346	14.2797	4.57622	2.913	2.89216	58.8475	44.3449	42.2445	36.8361	20.5523	35.0425	8.05923	2.60419	2.29742
ABCA10	0.276345	0.58979	0.435629	0.514867	0.447815	1.15013	0.364863	0.364212	0.596874	0.739584	0.686551	1.22813	0.273828	0.990569	0.0001	0.414908	0.500886	0.218892
ABCA11P	3.2685	1.0191	2.33572	1.04414	3.1526	1.66614	2.58833	2.68749	2.7078	1.98059	1.99299	2.60969	2.64531	2.54487	0.998935	2.00511	2.22014	2.92862
ABCA11P	3.2685	1.0191	2.33572	1.04414	3.1526	1.66614	2.58833	2.68749	2.7078	1.98059	1.99299	2.60969	2.64531	2.54487	0.998935	2.00511	2.22014	2.92862
ABCA13	0.0001	0.0001	0.37341	0.147176	0.597053	0.47928	0.0332603	0.364212	0.596874	0.0001	0.274681	0.491314	0.156516	0.0001	0.687206	0.296391	0.100257	0.765873
ABCA17P	0.0001	0.393227	0.124537	0.147176	0.0001	0.095936	0.0332603	0.13014	0.0689586	0.0001	0.13739	0.0001	0.0392041	0.0001	0.343653	0.0001	0.0001	0.0001
ABCA2	34.144	26.9293	24.763	16.8403	21.1919	15.4616	14.7564	11.9118	12.5898	43.9021	32.8125	29.2273	27.9204	21.2952	19.0673	19.259	15.3242	17.3941
ABCA3	68.5642	58.969	44.1752	56.4402	45.9655	42.6473	103.76	85.0204	88.6546	84.535	74.6859	75.5241	87.1618	74.0377	70.4284	126.992	89.5411	101.411
ABCA4	1.27082	0.393227	1.80443	0.845788	0.298577	1.02235	0.928588	0.338204	0.573922	3.58076	1.92216	3.31579	4.92721	2.22866	2.40497	6.51851	1.60262	5.14172
ABCA5	14.4201	18.2805	16.1769	16.0682	21.0427	21.3077	20.1284	17.8936	19.487	15.8795	17.5733	13.6313	11.5358	9.65717	12.5398	11.0221	7.41174	7.32964
ABCA6	73.7575	98.8715	70.9293	70.1189	71.0376	66.9258	115.597	92.8749	75.3079	69.4727	109.42	67.2964	85.7556	85.6757	75.4101	124.206	83.5313	66.8411
ABCA7	3.64653	2.55542	2.42662	1.87532	0.447815	0.447335	0.795946	1.01441	0.918214	6.18841	3.70694	3.43859	3.48036	1.4858	1.37431	2.07414	0.801358	0.437685
ABCA8	53.6469	61.9175	18.1056	38.5341	42.3838	14.3116	21.7863	22.5751	6.381	76.5562	87.5914	31.0694	69.6838	72.3043	25.0795	44.9772	43.5685	11.9243
ABCA9	11.8786	17.2977	9.33286	10.4058	8.65592	8.24201	9.55024	9.389	7.20728	15.7239	19.7699	11.6664	13.2955	13.3714	10.6502	14.9332	10.8171	9.51757
ABCB1	0.828834	0.393227	1.74221	0.661943	1.79096	0.798734	0.331703	0.338204	0.344393	1.28447	2.19674	1.10533	1.01681	0.247717	1.71786	0.118617	0.400729	1.53165
ABCB10	23.4768	30.8605	28.5583	17.2071	25.2214	20.8252	23.3068	25.9027	24.5253	24.909	31.7142	30.5769	27.6453	21.5428	21.1286	19.4961	24.6388	24.2861
ABCB10P1	0.000326056	0.782244	0.759044	0.259783	0.117884	0.103429	0.0001	0.186075	0.317009	0.480286	0.61596	0.000100016	0.000105842	0.0001	0.000100123	0.175966	0.0001	0.0001
ABCB10P3	0.164667	1.18359	0.00135439	0.308241	0.180793	0.353543	0.538304	0.556537	0.32962	0.410296	0.00190103	0.687866	0.288027	0.0001	0.687206	0.0915488	0.563703	0.547081
ABCB10P4	0.336639	0.0001	0.422051	0.242086	0.0001	0.249417	0.163267	0.143413	0.111115	0.121644	0.618052	0.173173	0.143732	0.247717	0.0001	0.0883349	0.337912	0.0001
ABCB10P4	0.336639	0.0001	0.422051	0.242086	0.0001	0.249417	0.163267	0.143413	0.111115	0.121644	0.618052	0.173173	0.143732	0.247717	0.0001	0.0883349	0.337912	0.0001
ABCB11	0.939331	0.0001	0.560065	0.809019	0.597053	0.447335	1.02807	0.468244	0.814926	0.311462	0.411971	0.491314	0.312933	0.495334	0.515429	0.177875	0.100257	0.218892
ABCB11	0.939331	0.0001	0.560065	0.809019	0.597053	0.447335	1.02807	0.468244	0.814926	0.311462	0.411971	0.491314	0.312933	0.495334	0.515429	0.177875	0.100257	0.218892
ABCB4	0.0553489	0.196663	0.0623184	0.0001	0.0001	0.0639907	0.0001	0.0001	0.0460057	0.0001	0.0001	0.0001	0.0392041	0.0001	0.0001	0.0593583	0.0001	0.0001
ABCB6	9.37906	11.1086	9.36352	6.1575	5.71207	4.41997	7.38568	5.25181	5.75231	10.5013	9.48642	10.1683	6.67863	6.43815	5.13373	7.14672	6.85673	6.61265
ABCB7	16.9615	18.0839	18.8523	11.7294	10.4468	14.088	12.8	12.8741	13.2668	14.7898	15.2393	15.8417	9.07225	7.92385	10.3067	11.3184	12.1191	10.8303
ABCB8	13.2598	16.5114	15.0569	9.26591	7.46202	12.1074	12.8331	12.9781	14.5063	8.91283	8.23752	7.73671	6.21765	3.96198	5.15339	10.3703	6.91095	9.29877
ABCB9	7.13088	5.96793	5.73516	1.78543	0.89553	1.76742	2.90556	2.72527	2.97526	13.109	8.78704	9.46737	5.64721	4.7142	5.67177	9.78103	8.63731	6.34666
ABCC1	102.21	108.11	118.526	132.185	172.072	139.858	123.921	129.494	120.988	134.587	158.022	151.908	254.961	230.284	224.341	170.961	181.987	184.66
ABCC10	16.3538	15.5286	14.1859	7.64806	7.7605	9.04063	15.1543	14.6426	14.8162	14.7509	14.5529	12.8945	10.5582	7.42862	10.6502	15.4665	14.2224	17.7223
ABCC2	1.16033	1.57261	1.12003	0.919326	0.746292	0.926515	1.06123	1.22248	1.45761	2.52991	1.373	2.94738	1.68158	1.23819	1.88964	2.78524	2.50403	2.62561
ABCC3	0.939331	1.17948	0.746721	0.514867	0.89553	0.670952	0.497504	2.75695	1.35432	0.0001	0.411971	0.122903	0.19562	0.247717	0.343653	0.237133	0.701201	0.875269
ABCC4	39.0611	33.2192	41.2508	38.9751	41.3391	36.0025	34.6528	27.8285	29.1157	45.8483	28.5564	39.7883	60.0255	32.6856	49.2998	52.3844	41.7658	50.6504
ABCC5	20.6632	28.5018	23.3942	9.41298	13.1331	14.8227	12.402	12.3799	13.8866	34.7169	50.9348	42.6128	21.2336	14.8571	22.6746	33.0662	27.5433	29.3183
ABCC6	0.816035	1.37604	0.435629	1.29729	0.597053	0.734843	0.497504	0.702317	0.711639	0.645163	1.373	1.22813	0.899494	0.990569	0.687206	0.237133	1.4023	0.984666
ABCC6P1	0.123397	1.17948	0.311192	0.13687	0.0001	0.0320453	0.0332603	0.13014	0.0230529	0.417519	0.34353	0.122903	0.0001	0.0001	0.0001	0.0001	0.0001	0.0001
ABCD1	12.4311	15.7252	9.8306	4.81685	3.13411	3.48214	6.83112	4.8636	5.81865	11.9875	8.5121	7.85952	5.12273	6.19053	3.09208	8.35552	6.20985	5.25112
ABCD1	12.4311	15.7252	9.8306	4.81685	3.13411	3.48214	6.83112	4.8636	5.81865	11.9875	8.5121	7.85952	5.12273	6.19053	3.09208	8.35552	6.20985	5.25112
ABCD3	40.4976	41.0818	45.0463	24.8192	26.1168	24.6938	26.1967	24.6818	25.8566	40.6327	45.8551	45.1918	35.7411	35.1618	38.4781	35.9106	38.16	37.1948
ABCD4	31.9115	34.0055	29.485	20.3195	19.5653	20.7744	26.8676	23.7412	25.298	34.7889	36.6549	35.0374	17.7813	18.819	21.9642	28.2978	26.7606	22.5357
ABCE1	123.314	130.667	152.51	128.212	165.188	140.261	156.111	166.578	160.484	126.467	131.759	159.167	177.71	178.955	204.267	174.925	216.926	212.658
ABCF1	74.0888	68.9937	62.7164	139.758	123.569	117.016	105.982	114.304	110.271	59.5871	57.113	61.2789	91.8933	114.399	96.3668	93.4512	114.279	101.739
ABCF1	74.0888	68.9937	62.7164	139.758	123.569	117.016	105.982	114.304	110.271	59.5871	57.113	61.2789	91.8933	114.399	96.3668	93.4512	114.279	101.739
ABCF1	74.0888	68.9937	62.7164	139.758	123.569	117.016	105.982	114.304	110.271	59.5871	57.113	61.2789	91.8933	114.399	96.3668	93.4512	114.279	101.739
ABCF1	74.0888	68.9937	62.7164	139.758	123.569	117.016	105.982	114.304	110.271	59.5871	57.113	61.2789	91.8933	114.399	96.3668	93.4512	114.279	101.739
ABCF1	74.0888	68.9937	62.7164	139.758	123.569	117.016	105.982	114.304	110.271	59.5871	57.113	61.2789	91.8933	114.399	96.3668	93.4512	114.279	101.739
ABCF1	74.0888	68.9937	62.7164	139.758	123.569	117.016	105.982	114.304	110.271	59.5871	57.113	61.2789	91.8933	114.399	96.3668	93.4512	114.279	101.739
ABCF1	74.0888	68.9937	62.7164	139.758	123.569	117.016	105.982	114.304	110.271	59.5871	57.113	61.2789	91.8933	114.399	96.3668	93.4512	114.279	101.739
ABCF2	79.3928	73.3182	75.7206	78.6863	89.2448	78.7121	77.6271	80.4427	79.5341	65.8143	66.4485	69.3802	88.6872	104.742	88.6367	83.1393	96.7501	98.238
ABCF2P1	0.442091	0.393227	0.248973	0.882557	0.447815	0.415389	0.63061	0.364212	0.528016	0.506063	0.274681	0.618049	0.547983	0.0001	0.343653	1.00749	0.802715	0.765873
ABCF3	35.9119	27.7155	34.158	35.3351	29.997	30.6357	28.0537	26.9443	27.4288	30.6303	35.6956	28.9817	28.3114	30.457	25.9383	31.2885	33.052	31.9438
ABCG1	8.95042	8.25576	7.4663	28.5328	27.46	42.8708	46.7895	50.5338	53.043	9.76908	6.72732	5.64905	26.0434	17.0857	19.2391	27.2589	19.03	20.129
ABCG2	27.1273	27.9121	28.185	7.501	7.61125	8.21004	2.32132	1.53457	2.57082	41.1777	33.3616	56.2439	22.6805	11.1429	28.3432	11.3777	2.90466	6.23568
ABCG4	1.60232	0.786353	2.3644	0.220714	0.447815	0.319553	0.464344	0.156148	0.355869	0.506063	1.09842	1.59654	0.156516	0.0001	0.515429	0.414908	0.400729	0.328289
ABHD1	0.221096	0.0001	0.186755	0.147176	0.149338	0.191772	0.0001	0.026108	0.0574821	0.194701	0.0001	0.0001	0.117412	0.0001	0.0001	0.0001	0.0001	0.0001
ABHD10	26.2433	32.2365	33.7847	18.8626	19.8488	20.3173	17.1771	15.5009	18.6493	25.4928	26.0853	26.7713	14.7032	17.3333	15.8035	16.2369	16.4259	15.7532
ABHD11	3.31503	3.53824	4.16873	2.1327	0.89553	1.85293	2.28816	1.79465	2.24948	2.17963	0.823842	1.84215	0.508453	0.742952	1.71786	1.4223	1.80293	1.53165
ABHD11	3.31503	3.53824	4.16873	2.1327	0.89553	1.85293	2.28816	1.79465	2.24948	2.17963	0.823842	1.84215	0.508453	0.742952	1.71786	1.4223	1.80293	1.53165
ABHD12	17.7902	14.7423	16.9857	11.6926	10.596	13.8325	14.1596	12.8741	14.667	13.9336	10.5715	14.8593	11.7313	9.65717	8.93247	10.9629	9.11441	13.1276
ABHD13	24.3096	24.1774	27.1273	24.8192	28.0569	25.6522	25.633	25.462	24.5023	32.6542	33.2243	36.1043	38.1657	32.6856	36.4167	33.1255	41.8658	35.4445
ABHD14A	4.14373	3.34167	2.30214	1.76501	0.298577	1.05127	1.32651	1.19613	1.13218	4.19101	1.92216	1.8425	1.60326	0.990569	0.685838	1.83854	1.09926	0.264546
ABHD14A-ACY1	0.000350476	0.000147613	0.0003941	0.000100366	0.000226644	0.12661	0.0338417	0.00208429	0.0348784	0.0946546	0.000186307	0.000100126	0.00197187	0.247722	0.00558597	0.000100005	0.0214526	0.33579
ABHD14B	22.4864	21.4255	18.7278	12.9796	14.4762	11.756	11.1751	10.7674	12.5782	18.098	12.3562	10.3152	9.03315	7.181	6.87116	6.3393	6.00954	6.56387
ABHD15	8.17694	10.418	7.65296	2.1327	2.83563	1.98071	4.57622	3.66723	4.06276	7.58954	3.84423	6.63148	3.12843	1.4858	5.15339	5.62964	4.50718	6.01689
ABHD16A	17.5107	15.7239	17.9179	16.8401	27.3095	23.4791	23.2434	21.0393	20.3473	22.1836	16.6115	15.3505	22.6801	13.6185	15.4599	19.3774	15.4239	18.4832
ABHD16A	17.5107	15.7239	17.9179	16.8401	27.3095	23.4791	23.2434	21.0393	20.3473	22.1836	16.6115	15.3505	22.6801	13.6185	15.4599	19.3774	15.4239	18.4832
ABHD16A	17.5107	15.7239	17.9179	16.8401	27.3095	23.4791	23.2434	21.0393	20.3473	22.1836	16.6115	15.3505	22.6801	13.6185	15.4599	19.3774	15.4239	18.4832
ABHD16A	17.5107	15.7239	17.9179	16.8401	27.3095	23.4791	23.2434	21.0393	20.3473	22.1836	16.6115	15.3505	22.6801	13.6185	15.4599	19.3774	15.4239	18.4832
ABHD16A	17.5107	15.7239	17.9179	16.8401	27.3095	23.4791	23.2434	21.0393	20.3473	22.1836	16.6115	15.3505	22.6801	13.6185	15.4599	19.3774	15.4239	18.4832
ABHD16A	17.5107	15.7239	17.9179	16.8401	27.3095	23.4791	23.2434	21.0393	20.3473	22.1836	16.6115	15.3505	22.6801	13.6185	15.4599	19.3774	15.4239	18.4832
ABHD16A	17.5107	15.7239	17.9179	16.8401	27.3095	23.4791	23.2434	21.0393	20.3473	22.1836	16.6115	15.3505	22.6801	13.6185	15.4599	19.3774	15.4239	18.4832
ABHD16B	0.939331	0.982916	1.18225	0.588405	0.447815	0.89457	0.895427	1.19647	0.872309	1.01203	1.51029	0.60651	1.09501	0.247717	1.20253	1.12601	1.80293	0.656477
ABHD17A	36.6922	40.2258	35.5956	23.1908	28.0654	30.0614	32.1759	30.4831	34.144	65.459	46.2244	53.8658	42.5198	30.0382	33.2448	64.9611	51.2506	56.1444
ABHD17AP1	1.3595	1.45855	0.992371	1.84676	0.940584	1.00481	1.0379	0.667915	0.752504	1.41501	0.883785	0.795128	0.695732	1.04793	0.540797	1.28942	0.978075	0.943758
ABHD17AP1	1.3595	1.45855	0.992371	1.84676	0.940584	1.00481	1.0379	0.667915	0.752504	1.41501	0.883785	0.795128	0.695732	1.04793	0.540797	1.28942	0.978075	0.943758
ABHD17AP2	1.43274	1.53715	1.04586	1.94619	0.99127	1.05894	1.09382	0.703897	0.792945	1.49128	0.93141	0.837975	0.733224	1.1044	0.569935	1.3589	1.03078	0.994614
ABHD17AP3	0.346461	0.413219	0.0655132	0.225703	0.0001	0.168853	0.34186	0.108435	0.259415	0.545657	0.13739	0.131503	0.355461	0.0001	0.0001	0.299163	0.421177	0.116342
ABHD17AP5	0.0001	0.199413	0.0670597	0.0001	0.0001	0.0973865	0.167246	0.131135	0.133085	0.211952	0.0001	0.122903	0.118594	0.0001	0.0001	0.0001	0.0001	0.0001
ABHD17B	18.619	22.998	24.3275	14.7812	18.9534	17.1548	16.746	17.7896	16.8475	21.0949	24.0259	22.9643	21.8202	19.5619	24.3924	21.2738	24.2382	19.8008
ABHD17C	15.4698	25.5533	19.8478	27.6136	65.8141	34.4372	40.3229	80.5472	51.4615	20.0051	17.436	23.0872	32.7691	57.1996	32.294	47.2885	66.4043	45.0712
ABHD2	88.7631	73.8764	86.5396	89.5451	93.5412	93.4366	120.576	121.689	121.461	58.1928	45.5092	62.2048	49.5272	37.4766	45.6367	64.3715	59.4883	63.3333
ABHD3	4.25427	4.52106	3.79542	1.32379	2.38791	2.49184	3.05084	4.55151	3.54632	3.0748	6.04087	6.14027	1.64247	2.72389	3.43563	4.08892	6.91095	5.36051
ABHD4	38.1219	38.9196	31.4204	16.9874	14.6255	16.4519	16.8124	12.614	15.7458	33.8607	22.1038	26.7712	16.5411	12.6286	15.6318	19.7331	11.3179	12.5807
ABHD5	14.3096	14.5458	14.8703	12.7222	12.0884	10.4143	12.4684	14.1485	13.3587	12.3378	12.7681	13.9997	13.882	15.1048	12.1962	11.674	14.7232	11.4867
ABHD6	6.18798	12.3836	5.22644	1.28702	1.79096	2.23627	3.01768	2.78296	3.51188	9.22419	9.47312	6.63149	1.9162	2.22866	2.06142	3.61486	4.70749	3.39138
ABHD8	6.17204	6.48669	4.60426	2.1327	1.64172	2.10849	3.74246	3.47713	3.7972	5.05552	2.8832	3.07018	1.13412	2.47627	0.171876	2.78451	3.60537	2.29742
ABI1	63.4811	62.9003	58.4757	65.6327	59.2478	62.6033	65.9517	68.8144	66.0585	58.8419	60.2484	58.9279	61.741	61.5955	59.4123	58.6659	61.1963	60.387
ABI2	90.4532	102.768	109.177	69.7099	59.8957	71.0869	69.1758	67.8836	69.305	58.2676	58.4168	61.0062	60.7834	50.882	68.4672	60.1957	58.9752	60.7913
ABI3	20.6632	21.8186	19.6611	9.41298	7.46202	10.8615	11.142	10.0392	13.9665	21.0559	15.9258	13.0173	6.29586	5.6953	6.18405	13.2147	12.4196	18.9256
ABI3BP	118.343	114.793	107.824	184.103	100.437	98.2639	130.884	144.449	105.618	107.226	108.734	107.822	129.63	130.99	99.1151	92.0283	66.4044	64.6531
ABL1	138.675	124.621	139.556	123.176	135.808	120.053	132.843	131.443	139.284	135.052	130.289	146.996	129.824	133.218	142.918	129.894	125.196	140.792
ABL2	257.567	200.887	267.789	169.91	115.212	161.773	230.831	200.152	200.386	156.808	156.237	175.362	136.238	106.723	141.715	216.65	196.109	185.864
ABLIM1	785.199	678.352	622.783	379.646	309.073	317.835	288.869	237.184	196.052	818.759	704.586	659.957	559.07	429.121	435.622	481.953	367.272	293.725
ABLIM2	1.04983	0.58979	0.124537	0.257483	0.89553	0.255663	0.596985	0.572277	0.378822	1.28447	1.09842	0.614117	0.782181	1.4858	0.0001	0.474166	0.701201	0.656477
ABLIM3	61.6029	73.1218	49.5882	56.9188	56.7107	41.8803	42.2132	42.731	44.7015	58.1076	44.2076	44.8234	56.5836	52.4949	45.6927	40.592	30.9487	33.1471
ABR	116.068	107.214	86.2736	135.143	111.182	111.706	173.312	158.885	162.624	112.962	83.61	82.0329	102.362	93.8471	84.6858	114.743	104.526	105.349
ABRACL	24.1991	25.3568	31.9181	18.2743	16.1178	27.8564	26.8268	25.2019	34.7737	35.6121	35.0091	44.0865	28.4288	21.5428	41.7418	39.4661	32.8517	46.9311
ABT1	21.6577	21.8186	22.5232	18.4214	29.2508	22.4257	20.7584	22.315	23.4809	16.9304	16.3376	15.9645	19.3957	19.8095	24.9077	19.0813	21.0331	22.2075
ABT1	21.6577	21.8186	22.5232	18.4214	29.2508	22.4257	20.7584	22.315	23.4809	16.9304	16.3376	15.9645	19.3957	19.8095	24.9077	19.0813	21.0331	22.2075
ABTB1	7.07196	10.418	6.84412	0.992864	1.34325	1.91682	3.38245	2.31481	2.12324	10.275	9.47313	7.85952	2.46366	0.495334	0.858982	4.02967	1.70277	1.64104
ABTB2	0.49734	0.393227	0.311192	5.29484	7.16354	3.4502	13.5958	11.8077	7.70075	0.467142	0.411971	0.122903	2.62007	2.22866	1.20253	7.40739	3.00482	1.42225
AC000036.4	0.0553489	0.393227	0.0623184	0.0001	0.0001	0.0001	0.0001	0.104132	0.0230529	0.0390202	0.13739	0.122903	0.0001	0.0001	0.0001	0.0001	0.0001	0.0001
AC000068.5	0.276345	0.196663	0.124537	0.0372846	0.149338	0.096321	0.0664205	0.13014	0.126483	0.313553	0.0001	0.36851	0.0783081	0.0001	0.343653	0.0601483	0.0001	0.437685
AC000078.5	0.0553489	0.393227	0.186755	0.0736381	0.0001	0.191772	0.132741	0.0001	0.126341	0.428222	0.274681	0.0001	0.352037	0.247717	1.71786	0.237133	0.400729	0.328289
AC000089.3	15.4233	15.806	13.5345	10.9581	14.5027	10.8299	13.3448	12.8645	12.4646	11.3562	11.8766	11.3332	9.61343	9.60568	10.6358	10.337	12.7238	8.09934
AC000110.1	0.110598	0.0001	0.0001	0.0075223	0.0001	0.0320453	0.132741	0.0262938	0.0231849	0.0392498	0.0001	0.0001	0.0783081	0.247717	0.173692	0.0596065	0.0001	0.111592
AC000120.7	0.0001	0.0001	0.0942659	0.52487	0.0001	0.0515686	0.0001	0.0403987	0.0826187	0.0001	0.0001	0.0001	0.0001	0.0001	0.0001	0.0001	0.0001	0.169207
AC000123.4	0.0001	0.196663	0.124537	0.0001	0.0001	0.319553	0.0995808	0.234172	0.218152	0.0390202	0.0001	0.122903	0.156516	0.247717	0.343653	0.0593583	0.500886	0.218892
AC002056.3	2.66897	0.700557	1.90171	5.721	2.75577	2.92619	3.17456	3.22845	3.50089	1.91092	0.605437	0.633705	2.885	3.495	2.9482	3.46848	3.5673	1.95598
AC002059.10	0.0553489	0.0001	0.0001	0.0001	0.0001	0.0320453	0.0001	0.0521161	0.0001	0.0779404	0.274681	0.0001	0.0392041	0.495334	0.0001	0.0001	0.0001	0.109496
AC002066.1	0.0553489	0.0001	0.0001	0.0439078	0.0001	0.095936	0.138706	0.026108	0.0230529	0.0001	0.0001	0.0001	0.117412	0.0001	0.475923	0.0593583	0.0001	0.218892
AC002069.5	0.828834	0.196663	0.0001	0.147176	0.0001	0.255663	0.165901	0.0781241	0.080435	0.155781	0.274681	0.0001	0.117412	0.0001	0.0001	0.177875	0.400729	0.218892
AC002075.4	1.72653	0.900329	0.395767	1.44174	1.01719	0.635531	0.371419	0.754015	0.439964	0.555503	1.10386	0.246141	0.16001	1.25025	0.858982	0.263351	0.81677	0.165746
AC002116.8	0.000104713	0.354349	0.0458645	0.0001	0.314681	0.105869	0.000132913	0.000490337	0.286877	0.629859	0.0868144	0.000100114	0.0001	0.0001	0.500668	0.24142	0.0001	0.000100329
AC002310.10	0.168215	0.196663	0.186755	0.036869	0.0001	0.0001	0.0001	0.0265668	0.0347436	0.117979	0.274681	0.122903	0.0796172	0.0001	0.0001	0.178263	0.0001	0.0001
AC002310.12	0.710635	0.875618	0.483182	0.474983	0.0001	0.119128	0.29455	0.44549	0.332471	0.76179	0.761107	0.985474	0.312848	0.0001	0.171876	0.701359	0.339465	0.610151
AC002310.7	0.557873	0.5444	0.44649	0.114637	0.261939	0.254916	0.0926099	0.282998	0.247522	0.169454	0.0001	0.544106	0.360232	0.0001	0.49418	0.324958	0.176306	0.0001
AC002398.11	0.483385	0.642261	0.763323	0.597869	0.765151	0.506078	0.825398	0.955967	0.612267	0.411764	0.773466	0.766822	0.368383	0.247717	1.1238	1.10941	0.681019	1.14721
AC002398.13	0.302529	0.196663	0.0623184	0.412983	0.0001	0.0122759	0.479912	0.161087	0.167657	0.0779404	0.13739	0.245707	0.0001	0.0001	0.0001	0.101434	0.400729	0.0001
AC002398.9	0.446292	0.299916	0.000135207	0.000101889	0.00895197	0.346829	0.330343	0.236909	0.00181133	0.699701	0.000260815	0.00645076	0.000105084	0.000175749	0.0681054	0.707096	0.00116048	0.000310568
AC002454.1	0.0001	0.393227	0.0001	0.036869	0.0001	0.0320453	0.0001	0.104132	0.0230529	0.0001	0.0001	0.0001	0.0001	0.495334	0.343653	0.118617	0.0001	0.109496
AC002467.7	0.442091	0.982916	0.74672	1.32379	0.149338	0.543171	0.928588	0.598285	0.677209	0.428222	0.961132	0.73692	0.703973	0.247717	1.03076	0.7112	0.901515	0.984666
AC002480.2	0.110598	0.0001	0.0623184	0.0736381	0.0001	0.0639907	0.0001	0.0521161	0.0345293	0.0390202	0.411971	0.0001	0.0001	0.0001	0.0001	0.0001	0.0001	0.0001
AC002480.3	4.00087	2.79925	3.1487	0.982292	0.945561	0.512641	0.933948	1.53019	1.29387	2.86167	1.04809	2.53492	0.974743	0.883514	0.343653	1.21792	0.555297	1.12421
AC002480.4	0.552589	0.786353	0.497847	0.036869	0.0001	0.127881	0.0995808	0.182156	0.137817	0.0001	0.0001	0.122903	0.234724	0.0001	0.171876	0.118617	0.100257	0.218892
AC002480.5	0.142999	0.345964	0.709039	0.562208	0.994737	0.158412	0.226862	0.420609	0.255652	0.213225	0.462302	0.412566	0.0421633	0.354772	0.343653	0.204476	0.246161	0.188748
AC002519.6	0.663087	0.196663	0.0772058	0.588405	0.0001	0.447335	0.615334	0.806349	0.255452	0.524005	0.549261	0.687139	0.469349	0.495334	0.172639	0.592683	0.701201	0.765873
AC002550.5	0.000100016	0.000584275	0.000100056	0.538011	0.372076	0.317849	0.495422	0.0826777	0.338003	0.291227	0.000101741	0.44226	0.174803	0.0023199	2.62046	0.229073	0.320667	0.606337
AC003002.6	0.0001	0.0001	0.139003	0.0001	0.0001	0.0001	0.0755109	0.0273757	0.0724916	0.0854589	0.13739	0.0001	0.136073	0.0001	0.0001	0.0001	0.0001	0.109496
AC003006.7	0.0001	0.0001	0.0001	0.000120827	0.597053	0.0001	0.0001	0.0292404	0.0001	0.15066	0.0001	0.0001	0.0001	0.0001	0.0001	0.0001	0.134112	0.244648
AC003051.1	0.110598	0.0001	0.0001	0.036869	0.0001	0.0001	0.0001	0.0001	0.0460057	0.0001	0.0001	0.0001	0.117412	0.0001	0.0001	0.118617	0.0001	0.0001
AC003075.4	0.0585743	0.0001	0.0001	0.0736381	0.0001	0.0673953	0.203273	0.0789323	0.0239476	0.116861	0.145254	0.0001	0.156516	0.0001	0.0001	0.0001	0.0001	0.218892
AC003092.1	0.0001	0.0001	0.0001	0.0001	0.0001	0.0001	0.0664205	0.0781241	0.0919114	0.0001	0.0001	0.0001	0.0001	0.0001	0.0001	0.0001	0.100257	0.109496
AC003102.3	0.0001	0.0001	0.0001	0.0001	0.0001	0.0001	0.0332603	0.13014	0.0115764	0.155781	0.0001	0.122903	0.117412	0.0001	0.171876	0.0593583	0.0001	0.0001
AC003665.1	0.331593	0.982916	0.622284	0.220714	0.298577	0.319553	0.398023	0.962397	0.769021	0.233621	0.411971	0.122903	0.19562	0.495334	0.515429	0.474166	0.200414	0.0001
AC003682.16	0.0553489	0.0001	0.0001	0.0001	0.0001	0.0639907	0.0001	0.026108	0.0115764	0.0390202	0.13739	0.0001	0.0392041	0.0001	0.0001	0.0001	0.0001	0.218892
AC004014.4	0.221096	0.0001	0.0623184	0.036869	0.0001	0.223717	0.0664205	0.156148	0.0345293	0.116861	0.0001	0.122903	0.0392041	0.247717	0.0001	0.0001	0.601043	0.218892
AC004017.1	0.110598	0.196663	0.0001	0.036869	0.0001	0.0001	0.165901	0.026108	0.0115764	0.0001	0.0001	0.0001	0.0001	0.0001	0.0001	0.0001	0.100257	0.0001
AC004041.2	0.0001	0.0001	0.0001	0.110407	0.0001	0.0320453	0.0336397	0.0560075	0.034654	0.0805055	0.137477	0.0001	0.0001	0.0001	0.0001	0.0001	0.52085	0.0001
AC004057.1	270.939	267.147	143.133	260.954	210.821	128.451	191.461	215.752	137.544	205.519	216.936	116.26	175.827	240.905	129.168	189.546	235.004	154.459
AC004067.5	0.221096	0.393227	0.186755	0.147176	0.149338	0.095936	0.0332603	0.286188	0.183723	0.272541	0.961132	0.36851	0.0392041	0.0001	0.0001	0.237133	0.0001	0.218892
AC004069.2	0.23326	0.0001	0.0684675	0.0850297	0.0001	0.106795	0.03924	0.0913654	0.0376674	0.130811	0.300301	0.26273	0.0435334	0.0001	0.0001	0.0629941	0.0001	0.0001
AC004074.3	8.33771	6.92294	7.35636	4.84102	5.43212	5.82999	5.47846	5.85136	5.34127	7.89294	5.90358	3.48821	6.36585	6.19053	6.39489	6.20873	6.95779	6.68691
AC004158.2	0.49734	0.196663	0.248973	0.294252	0.0001	0.255663	0.132741	0.26018	0.0919114	0.233621	0.0001	0.0001	0.273828	0.0001	0.687206	0.237133	0.200414	0.0001
AC004166.6	0.235532	0.359998	0.311192	0.150576	0.042557	0.202152	0.282897	0.3486	0.311557	0.445583	0.0001	0.0001	0.219483	0.970294	0.171876	0.0001	0.100257	0.469358
AC004257.3	0.165847	0.786353	0.37341	0.331021	0.597053	0.89457	0.398023	1.24849	0.516539	0.194701	0.411971	0.245707	0.352037	0.247717	1.03076	0.533425	0.801358	0.875269
AC004381.6	6.85096	6.29012	3.29767	2.68424	1.79096	2.49184	3.31613	2.90996	2.01995	5.76029	8.23752	3.807	4.20123	5.94291	3.26385	3.91115	4.80765	1.75044
AC004447.2	5.59735	9.75146	8.17455	3.64712	5.90509	7.57168	6.63179	7.8012	7.84102	9.21523	14.3299	10.3322	5.7258	4.55835	7.3373	6.1808	7.81651	7.83583
AC004453.8	84.4277	65.9368	50.9872	79.4986	45.2925	48.0641	56.6392	58.0082	50.2237	55.3532	56.6729	45.1444	44.8515	64.1301	47.39	45.6097	52.0232	48.851
AC004463.6	0.552589	0.196663	0.186755	0.183945	0.447815	0.287608	0.331703	0.364212	0.459157	0.622823	0.274681	0.491314	0.352037	0.0001	0.515429	0.35565	0.701201	1.09406
AC004463.6	0.552589	0.196663	0.186755	0.183945	0.447815	0.287608	0.331703	0.364212	0.459157	0.622823	0.274681	0.491314	0.352037	0.0001	0.515429	0.35565	0.701201	1.09406
AC004466.1	1.569	0.98816	2.53781	1.08973	2.15289	0.79105	1.06158	1.37127	1.22941	1.96595	1.20909	2.49446	0.522007	0.447694	0.54677	0.999665	1.53909	0.743936
AC004490.1	0.0001	0.393227	0.0001	0.0001	0.0001	0.0641723	0.0334473	0.104132	0.0231618	0.0779404	0.0001	0.0001	0.0783081	0.0001	0.0001	0.119871	0.101817	0.0001
AC004538.3	0.116262	0.0001	0.0001	0.036869	0.154288	0.0320453	0.0378726	0.0521161	0.011722	0.155781	0.13739	0.122903	0.0790065	0.247717	0.343653	0.237133	0.20222	0.0001
AC004540.4	4.36476	4.52106	2.05331	1.25025	0.89553	0.287608	0.464344	0.286188	0.126341	5.76029	5.76629	4.29822	1.05591	1.4858	1.54609	2.07414	1.10183	0.765873
AC004540.5	2.09956	1.96573	1.49334	1.02963	0.746292	0.734843	0.464344	0.39022	0.528016	2.80236	1.78487	2.94738	1.09501	0.0001	0.515429	0.770458	0.500886	0.218892
AC004706.1	0.579952	2.35776	0.0165808	0.182426	1.79013	0.0202683	1.03949	0.0510786	0.255167	0.872885	0.0001	0.347607	0.389164	1.23761	2.57555	0.0525103	0.0018099	0.775801
AC004771.1	0.0001	0.0001	0.0733645	0.34	0.0001	0.12109	0.111711	0.275833	0.402717	0.270992	0.549261	0.0001	0.0001	0.865971	0.542795	0.0001	0.18153	0.218892
AC004797.1	40.9292	50.0245	45.2669	34.7987	38.9719	38.8826	42.1291	39.3096	42.366	40.5842	48.7589	43.8099	49.9077	50.7196	51.5823	48.3192	57.0396	58.2352
AC004837.3	0.254753	0.196663	0.0021544	0.00013774	0.0633564	0.00831273	0.303703	0.0208862	0.17021	0.238249	0.989515	0.0552898	0.0717487	0.560997	0.00120231	3.56205	0.0238494	0.00242168
AC004837.4	0.0001	0.0001	0.0001	0.0001	0.0001	0.232674	0.0611683	0.0444995	0.10642	0.25089	0.470716	0.0001	0.078897	0.0001	0.265887	0.363749	0.850306	0.376745
AC004837.5	0.0553489	0.393227	0.0623184	0.036869	0.0001	0.319553	0.232222	0.468244	0.298487	0.155781	0.13739	0.0001	0.156516	0.0001	0.171876	0.592683	0.500886	0.218892
AC004840.9	1.38132	1.37604	1.30669	0.441329	0.298577	0.255663	0.364863	0.416228	0.550969	1.79043	1.373	1.59654	0.586661	0.495334	0.343653	1.30378	1.60262	1.09406
AC004870.5	0.110598	0.0001	0.0001	0.036869	0.0001	0.0639907	0.0664205	0.0001	0.0345293	0.0390202	0.0001	0.0001	0.0392041	0.0001	0.0001	0.118617	0.0001	0.109496
AC004878.3	0.298377	0.0001	0.0664119	0.079239	0.0001	0.0001	0.0592154	0.0381905	0.0512072	0.137012	0.0001	0.0001	0.0001	0.0001	0.0001	0.062962	0.000100317	0.0001
AC004878.5	0.00995922	0.0001	0.000100001	0.0507563	0.242274	0.0001	0.000121718	0.0185402	0.0248971	0.00413341	0.0001	0.0001	0.246693	0.637005	0.171876	0.0001	0.225125	0.0001
AC004889.1	0.0838597	0.103311	0.0901484	0.0021605	0.0164995	0.0548396	0.000100062	0.0896901	0.000152427	0.000433272	0.0001	0.0001	0.0188465	0.0001	0.687206	0.0565496	0.0138904	0.0001
AC004893.10	0.110598	0.0001	0.0623184	0.0736381	0.0001	0.095936	0.0664205	0.0781241	0.137817	0.0001	0.0001	0.0001	0.0001	0.0001	0.0001	0.0001	0.0001	0.0001
AC004893.11	1.00412	0.196663	1.46268	0.373652	0.4552	0.937784	0.646715	0.742237	0.739732	0.634809	1.23571	1.24244	0.790337	0.247717	1.54973	0.662931	1.31576	1.87954
AC004906.3	0.130671	0.0001	0.0001	0.0396851	0.0001	0.0001	0.0001	0.0571769	0.0001	0.0846237	0.0001	0.0001	0.166517	0.0001	0.0001	0.072467	0.116728	0.0001
AC004941.5	0.0553489	0.196663	0.124537	0.0001	0.447815	0.127881	0.364863	0.156148	0.0345293	0.0390202	0.0001	0.0001	0.0001	0.0001	0.0001	0.0001	0.0001	0.109496
AC004951.5	0.0663901	0.0001	0.069438	0.0001	0.0001	0.0320453	0.103867	0.141046	0.0376285	0.252876	0.0001	0.0001	0.0392041	0.0001	0.0001	0.0001	0.101068	0.0001
AC004951.6	0.607838	0.58979	0.684502	0.625174	0.149338	0.319553	0.563825	0.858365	0.528016	0.895265	1.92216	0.614117	0.547557	0.0001	0.171876	0.592683	0.200414	0.765873
AC004967.7	0.0553489	0.0001	0.0623184	0.036869	0.0001	0.0001	0.0332603	0.0001	0.0345293	0.0001	0.0001	0.245707	0.0001	0.0001	0.0001	0.0593583	0.0001	0.109496
AC004980.10	0.0629154	0.196663	0.271403	0.0383128	0.0001	0.0330273	0.0685277	0.106959	0.0238301	0.124203	0.43874	0.0001	0.117412	0.0001	0.0001	0.0607	0.0001	0.0001
AC004980.7	1.80162	7.81037	2.27296	1.28676	5.04318	0.980608	1.74471	3.27953	1.11987	2.11122	8.6618	2.71846	1.30667	4.63701	1.24827	1.15723	3.17615	1.51749
AC004985.12	0.0553489	0.0001	0.0001	0.0736381	0.0001	0.0320453	0.0001	0.0263213	0.0001	0.0392205	0.274681	0.0001	0.039585	0.0001	0.171876	0.0593583	0.300572	0.0001
AC004987.9	15.6109	18.068	16.9958	19.4581	11.4021	13.3619	13.8198	14.4805	16.1394	14.5234	12.6088	12.5276	9.52281	8.83955	10.5951	17.2791	14.0977	15.7826
AC005003.1	0.99458	0.982916	0.933376	0.147176	0.447815	0.127881	0.464344	0.520261	0.48211	0.661744	0.686551	0.245707	0.234724	0.247717	0.0001	0.35565	0.500886	0.547081
AC005013.1	1.58197	3.01716	0.332706	0.0001	0.0001	0.0189472	0.000100016	0.00777215	0.0068709	0.27493	0.567093	0.0134654	0.0577768	0.14619	0.0001	0.0875034	0.0591911	0.0323709
AC005014.5	0.276713	0.196663	0.498228	0.625174	0.0001	0.383672	0.497829	0.520531	0.355907	0.155852	0.411971	0.122903	0.273946	0.0001	0.172145	0.592683	0.200414	0.218892
AC005034.3	0.0001	0.196663	0.0623184	0.0001	0.0001	0.0001	0.0664205	0.0978556	0.0460057	0.0779404	0.0001	0.0001	0.0001	0.0001	0.0001	0.0593583	0.0001	0.0001
AC005037.3	0.0001	0.0001	0.127018	0.036869	0.0001	0.129666	0.165901	0.0263734	0.0426637	0.0390202	0.0001	0.0001	0.0797837	0.0001	0.0001	0.0001	0.0001	0.109496
AC005042.4	0.114422	0.196663	0.124537	0.0001	0.0001	0.159827	0.0664205	0.079852	0.222584	0.160354	0.13739	0.263688	0.273828	0.247717	0.0001	0.296528	0.0001	0.0001
AC005076.5	0.0553489	0.0001	0.0623184	0.0001	0.149338	0.0320453	0.0001	0.0521161	0.0689586	0.0779404	0.13739	0.122903	0.0783081	0.0001	0.171876	0.0001	0.0001	0.0001
AC005082.12	0.663087	0.786353	0.124537	0.661943	0.298577	0.127881	0.530664	0.338204	0.103388	1.16771	0.13739	0.859724	0.86039	0.0001	0.0001	0.651941	0.200414	0.218892
AC005104.3	0.0553489	0.393227	0.0001	0.036869	0.0001	0.159827	0.0664205	0.26018	0.0574821	0.0001	0.0001	0.0001	0.0392041	0.0001	0.0001	0.0593583	0.200414	0.109496
AC005154.6	6.29847	9.23857	7.73393	3.27254	2.98487	4.82385	4.57622	5.61783	6.08056	7.076	8.92397	7.73672	3.28484	5.20006	6.61367	4.91854	5.40859	6.01365
AC005154.7	0.0553489	0.0001	0.10579	0.0001	0.0001	0.0001	0.165901	0.026108	0.114864	0.124436	0.274681	0.614109	0.0783081	0.0001	0.0001	0.0001	0.100257	0.109496
AC005224.2	0.276345	0.393227	0.248973	0.0736381	0.298577	0.223717	0.265382	0.0781241	0.080435	0.116861	0.549261	0.491314	0.0783081	0.0001	0.0001	0.0593583	0.100257	0.0001
AC005229.7	0.0001	0.196663	0.0001	0.220714	0.0001	0.0001	0.0995808	0.026108	0.0230529	0.0001	0.0001	0.0001	0.0001	0.0001	0.343653	0.0001	0.100257	0.328289
AC005253.2	1.95881	3.42392	2.32713	0.867873	3.4558	2.74098	2.88392	3.61384	3.28537	3.7573	3.28684	2.66021	2.43556	1.24686	4.11017	2.54436	2.06589	4.40105
AC005255.3	4.71583	4.97198	5.84277	1.99936	4.62649	4.95138	3.46623	5.51366	5.00583	3.38612	3.43236	4.05261	3.54273	1.98104	3.26385	4.16814	4.90781	6.24069
AC005264.2	0.110598	0.0001	0.0001	0.0001	0.0001	0.0001	0.0332603	0.0521161	0.0115764	0.194701	0.0001	0.0001	0.0001	0.247717	0.0001	0.118617	0.0001	0.218892
AC005280.1	1.23073	0.209109	0.177609	2.86977	0.740431	1.21034	1.0725	2.1474	1.0943	0.495428	2.2247	3.9822	1.02948	0.806852	0.266428	2.56266	0.854097	0.299024
AC005306.3	0.119259	0.410338	0.556362	0.189553	0.149338	0.289036	0.285607	0.674691	0.31629	0.595994	1.07558	0.388012	0.211646	0.0001	0.555064	0.179044	0.354129	0.445405
AC005329.7	0.690542	0.00357249	0.555685	0.0001	0.149338	0.0851969	0.000102167	0.0621491	0.0001	0.741357	0.000106642	1.239	0.0001	0.0001	0.00170684	0.0001	0.428863	0.34638
AC005330.2	0.276345	0.0001	0.124537	0.0001	0.149338	0.0001	0.0995808	0.0001	0.0230529	0.155781	0.13739	0.0001	0.0001	0.0001	0.0001	0.0001	0.0001	0.0001
AC005336.4	0.331593	0.393227	0.0001	0.257483	0.298577	0.351499	0.0664205	0.0781241	0.137817	0.155781	0.0001	0.0001	0.19562	0.247717	0.0001	0.0593583	0.500886	1.20346
AC005351.1	0.0553489	0.0001	0.124537	0.0001	0.149338	0.127881	0.0664205	0.0001	0.0460057	0.0001	0.0001	0.122903	0.0783081	0.0001	0.0001	0.0001	0.0001	0.0001
AC005484.5	0.0452857	0.0001	0.0001	0.0001	0.0001	0.0001	0.047976	0.0600818	0.0592754	0.0302924	0.0001	0.148918	0.0001	0.0001	0.0859882	0.0001	0.0001	0.0001
AC005517.3	0.165847	0.196663	0.0001	0.0919991	0.149338	0.223717	0.165901	0.13014	0.126341	0.0390202	0.411971	0.0001	0.0392041	0.247717	0.0001	0.0593583	0.100257	0.0001
AC005519.4	1.56955	1.37604	2.12209	0.712557	1.17907	0.980592	1.11989	1.74682	1.68325	2.84714	4.53238	3.0319	1.10614	1.23819	1.39758	2.39819	1.38377	2.735
AC005523.2	8.26636	4.81175	10.7236	13.2331	6.80656	6.64464	7.03767	8.56976	8.33314	4.76333	4.82913	9.49577	10.5475	5.89544	8.50134	4.51142	6.18882	6.51486
AC005534.6	0.221096	0.58979	0.0001	0.0001	0.0001	0.127881	0.132741	0.026108	0.0574821	0.194701	0.274681	0.0001	0.0783081	0.0001	0.0001	0.0593583	0.0001	0.0001
AC005550.4	0.331593	0.196663	0.124537	0.036869	0.0001	0.0639907	0.0995808	0.0001	0.103388	0.661744	0.411971	0.245707	0.117412	0.0001	0.171876	0.118617	0.400729	0.218892
AC005562.1	5.71585	3.72234	6.71281	3.3103	5.18929	4.53741	3.02694	4.11857	3.35832	4.63942	4.75949	3.32463	3.50836	1.10288	2.5481	2.93171	1.56197	2.36602
AC005592.2	0.165847	0.196663	0.0001	0.0001	0.0001	0.0001	0.132741	0.0001	0.080435	0.0001	0.0001	0.0001	0.0001	0.0001	0.0001	0.0593583	0.0001	0.0001
AC005594.3	0.264051	0.0001	0.0737721	0.330736	0.192564	0.16406	0.249884	0.363565	0.247293	0.465887	0.369404	0.0001	0.191216	0.0001	0.0001	0.625598	0.377894	0.56038
AC005609.1	0.000100517	0.0001	0.186736	0.0001	0.000100698	0.000100149	0.00010031	0.000100486	0.0574821	0.000100182	0.000100642	0.0001	0.0392041	0.742952	0.0001	0.177875	0.000100937	0.109496
AC005618.1	2.13044	0.577112	0.990046	1.32208	1.27511	1.1111	1.41766	1.11927	1.2883	1.70869	1.37816	0.525493	1.06383	1.81869	1.56706	1.46995	2.76997	1.04829
AC005618.6	0.110598	0.0001	0.248973	0.036869	0.0001	0.223717	0.331703	0.234172	0.367346	0.311462	0.411971	0.491314	0.469349	0.0001	0.343653	0.35565	0.901515	0.437685
AC005624.2	0.0553489	0.0001	0.0001	0.0001	0.149338	0.0001	0.0332603	0.0781241	0.080435	0.0390202	0.13739	0.0001	0.0001	0.0001	0.0001	0.0593583	0.0001	0.0001
AC005682.5	0.99458	2.55542	0.933376	1.61794	0.597053	0.95846	1.35967	1.14445	0.929691	0.233621	0.274681	0.491314	0.352037	0.495334	0.0001	0.414908	0.500886	0.765873
AC005682.6	0.0001	0.0001	0.186755	0.036869	0.149338	0.0001	0.0332603	0.026108	0.0574821	0.0001	0.0001	0.0001	0.0001	0.0001	0.0001	0.0001	0.0001	0.109496
AC005682.7	0.13558	0.393227	0.0001	0.125493	0.149338	0.0338927	0.0995808	0.110972	0.078215	0.0390202	0.0001	0.0001	0.0001	0.0001	0.0001	0.0001	0.0001	0.0001
AC005740.3	0.0553489	0.0001	0.0623184	0.0736381	0.149338	0.0639907	0.165901	0.104132	0.080435	0.0390202	0.13739	0.0001	0.0392041	0.0001	0.0001	0.0001	0.0001	0.0001
AC005740.6	0.0001	0.0001	0.124537	0.036869	0.0001	0.0320453	0.0332603	0.026108	0.0689586	0.0779404	0.549261	0.0001	0.234724	0.0001	0.171876	0.296391	0.0001	0.547081
AC005776.1	0.0001	0.0001	0.0001	0.147176	0.0001	0.0320453	0.0001	0.026108	0.0345293	0.0390202	0.0001	0.0001	0.0392041	0.0001	0.0001	0.0001	0.0001	0.0001
AC005785.2	0.0619484	0.0001	0.202446	0.328258	0.0001	0.106566	0.180498	0.343279	0.215284	0.388896	0.320652	0.26493	0.43597	0.526172	0.184804	0.42785	0.865795	0.373759
AC005786.7	0.000130538	0.0001	0.000100059	0.550089	0.000100058	0.000100001	0.000100021	0.000407462	0.00010058	0.003656	0.163767	0.520797	0.0001	0.995838	1.08284	0.000256428	0.000100599	0.000101863
AC005789.11	2.26531	2.94855	3.0488	1.13994	2.53715	2.0446	2.4208	2.88699	3.4086	1.98503	2.47132	2.57897	3.59767	5.44768	4.46629	4.32596	6.41016	5.03232
AC005795.1	23.4705	11.0825	15.5171	22.9739	16.8555	15.2089	20.7742	19.7049	17.7651	14.2097	13.3062	11.596	15.7073	22.4711	18.5131	20.1831	19.5936	24.6064
AC005795.1	23.4705	11.0825	15.5171	22.9739	16.8555	15.2089	20.7742	19.7049	17.7651	14.2097	13.3062	11.596	15.7073	22.4711	18.5131	20.1831	19.5936	24.6064
AC005822.1	5.60493	7.69989	5.25638	6.60121	4.94272	5.01787	4.31745	3.14494	4.04435	7.41448	8.24601	6.00244	9.9244	12.5493	7.56088	4.63946	4.32804	5.29966
AC005884.1	0.631352	0.000100228	0.182141	0.380353	0.223763	0.00728062	0.210531	0.417571	0.374515	0.125426	0.908779	0.339447	0.410409	0.331772	0.423683	0.163901	0.348161	0.169825
AC005932.1	0.274818	0.267376	0.378952	0.0597668	0.0001	0.0890725	0.0001	0.139061	0.107042	0.379947	0.171192	0.154717	0.28649	0.990569	0.392077	0.0768725	0.223111	0.0001
AC005943.4	0.221096	0.393227	0.0001	0.110407	0.447815	0.287608	0.199062	0.182156	0.206676	0.194701	0.0001	0.0001	0.117412	1.23819	0.343653	0.118617	0.300572	0.218892
AC005943.5	1.32607	1.37604	2.61327	1.69148	1.9402	1.62931	1.45915	1.40453	2.30686	1.55691	2.19674	2.33336	1.64247	2.97151	0.171876	2.78524	3.30529	3.50078
AC006014.10	0.0152113	0.0001	0.0001	0.423067	0.00237468	0.066629	0.0367801	0.0135861	0.0192223	0.000420807	0.0001	0.0849518	0.0963333	0.00621354	0.0001	0.0001	0.000102516	0.0001
AC006014.7	0.0602867	0.0001	0.0001	0.0951809	0.0001	0.080319	0.228831	0.0859359	0.0877277	0.0400857	0.0001	0.133875	0.0983012	0.0001	0.0001	0.0001	0.0001	0.0001
AC006014.7	0.0602867	0.0001	0.0001	0.0951809	0.0001	0.080319	0.228831	0.0859359	0.0877277	0.0400857	0.0001	0.133875	0.0983012	0.0001	0.0001	0.0001	0.0001	0.0001
AC006014.8	0.0553489	0.196663	0.38495	0.101391	0.0001	0.1176	0.0332603	0.0001	0.0345293	0.0398918	0.0001	0.36851	0.019652	0.0001	0.0859882	0.200121	0.0001	0.109496
AC006014.8	0.0553489	0.196663	0.38495	0.101391	0.0001	0.1176	0.0332603	0.0001	0.0345293	0.0398918	0.0001	0.36851	0.019652	0.0001	0.0859882	0.200121	0.0001	0.109496
AC006026.10	2.26085	1.26456	2.04637	1.86764	0.795966	1.77861	1.1188	1.74952	1.35209	1.84876	3.03678	0.886056	1.19058	1.98104	2.06142	0.894926	1.71843	1.22452
AC006026.9	1.16789	0.7953	0.747989	0.775167	0.449576	1.08487	0.89665	1.25147	0.761477	0.702016	0.551685	0.859724	1.10113	1.4858	1.03455	1.01197	2.9186	1.31955
AC006028.11	0.0001	0.0001	0.124537	0.257483	0.298577	0.095936	0.132741	0.182156	0.0919114	0.116861	0.549261	0.0001	0.0392041	0.0001	0.343653	0.0001	0.100257	0.109496
AC006042.6	0.165847	0.393227	0.311192	0.0001	0.149338	0.095936	0.0001	0.156148	0.103388	0.0001	0.0001	0.122903	0.0392041	0.0001	0.0001	0.118617	0.200414	0.0001
AC006042.8	0.276345	0.0001	0.0001	0.0001	0.0001	0.0320453	0.0664205	0.0001	0.0115764	0.0001	0.0001	0.0001	0.0392041	0.0001	0.0001	0.0001	0.0001	0.0001
AC006111.1	0.176883	0.304187	0.0001	0.0561889	0.0001	0.340571	0.166078	0.32877	0.127156	0.327953	0.549261	0.93674	0.36417	0.990569	0.513487	0.545851	0.0001	0.0001
AC006116.20	0.0001	0.0001	0.0001	0.036869	0.149338	0.0001	0.0995808	0.0521161	0.0919114	0.0390202	0.0001	0.0001	0.0001	0.0001	0.0001	0.0001	0.100257	0.0001
AC006116.22	0.276345	0.196663	0.124537	0.147176	0.298577	0.0320453	0.166994	0.156438	0.115701	0.235573	0.0001	0.245707	0.162896	0.0001	0.171876	0.237133	0.0001	0.0001
AC006116.24	0.505756	0.570753	0.115675	0.726411	0.0001	0.208072	0.319923	0.335758	0.461903	0.470613	0.509289	0.458502	0.294316	0.0001	0.508665	0.216211	0.427131	0.429067
AC006116.27	0.165136	0.000675288	0.0148974	0.00240497	1.99018	0.34389	0.0120413	0.170359	0.0280553	0.215757	0.0102258	0.00071031	0.0685705	0.281468	0.500917	0.0016838	1.17615	1.03392
AC006126.4	0.221096	1.17948	0.124537	0.0001	0.0001	0.0001	0.0001	0.0001	0.0115764	0.0001	0.274681	0.0001	0.0001	0.0001	0.0001	0.0001	0.0001	0.0001
AC006129.1	0.0001	0.0001	0.0001	0.0001	0.0001	0.0001	0.0001	0.0001	0.0574821	0.0390202	0.0001	0.0001	0.234724	0.0001	0.0001	0.177875	0.601043	0.218892
AC006129.1	0.0001	0.0001	0.0001	0.0001	0.0001	0.0001	0.0001	0.0001	0.0574821	0.0390202	0.0001	0.0001	0.234724	0.0001	0.0001	0.177875	0.601043	0.218892
AC006129.2	0.165847	0.393227	0.248973	0.0736381	0.0001	0.0001	0.0332603	0.026108	0.114864	0.506063	0.411971	0.614117	0.156516	0.495334	0.343653	0.651941	0.500886	0.437685
AC006129.2	0.165847	0.393227	0.248973	0.0736381	0.0001	0.0001	0.0332603	0.026108	0.114864	0.506063	0.411971	0.614117	0.156516	0.495334	0.343653	0.651941	0.500886	0.437685
AC006129.4	0.0553489	0.0001	0.0001	0.036869	0.0001	0.0320453	0.0001	0.026108	0.114864	0.0390202	0.0001	0.0001	0.19562	0.0001	0.171876	0.0001	0.100257	0.437685
AC006129.4	0.0553489	0.0001	0.0001	0.036869	0.0001	0.0320453	0.0001	0.026108	0.114864	0.0390202	0.0001	0.0001	0.19562	0.0001	0.171876	0.0001	0.100257	0.437685
AC006159.5	0.0001	0.0001	0.0001	0.110407	0.149338	0.127881	0.0001	0.0001	0.0115764	0.0390202	0.0001	0.0001	0.0001	0.0001	0.0001	0.0001	0.0001	0.0001
AC006273.4	0.165847	0.0001	0.0623184	0.0001	0.0001	0.0639907	0.165901	0.0001	0.0001	0.0390202	0.0001	0.0001	0.0001	0.0001	0.0001	0.0001	0.0001	0.0001
AC006273.5	0.386842	0.0001	0.248973	0.0001	0.0001	0.0001	0.0001	0.026108	0.080435	0.428222	0.274681	0.36851	0.0001	0.0001	0.0001	0.177875	0.100257	0.0001
AC006277.2	0.104705	0.196663	0.0623184	0.0001	0.0001	0.0001	0.0664205	0.0521161	0.0141695	0.220679	0.13739	0.0001	0.0001	0.0001	0.0001	0.0001	0.0001	0.0001
AC006449.1	0.0258924	0.0154913	0.000100579	0.257677	0.00011216	0.00010121	0.000487549	0.0346341	0.000458266	0.969043	0.00620883	0.000100001	0.0843085	0.0453585	0.0285596	0.000106431	0.00010334	0.627603
AC006460.2	0.0564646	0.982916	0.0001	0.0001	0.0001	0.0656065	0.200191	0.0791128	0.0817948	0.0789857	0.0001	0.371847	0.0001	0.0001	0.173343	0.242772	0.100257	0.222548
AC006465.4	0.221096	0.196663	0.0001	0.0736381	0.298577	0.095936	0.0001	0.0001	0.0460057	0.0779404	0.274681	0.122903	0.0001	0.0001	0.0001	0.0593583	0.0001	0.0001
AC006483.5	0.331593	0.0001	0.186755	0.36779	0.0001	0.0639907	0.165901	0.182156	0.103388	0.0001	0.0001	0.0001	0.0001	0.247717	0.0001	0.177875	0.400729	0.328289
AC006486.1	0.331593	0.393227	0.124537	0.0736381	0.0001	0.0320453	0.398023	0.208164	0.264058	0.389302	0.411971	0.245707	0.19562	0.0001	0.515429	0.177875	0.100257	0.109496
AC006538.1	0.165847	0.0001	0.124537	0.0001	0.447815	0.0320453	0.0995808	0.0781241	0.0574821	0.0390202	0.0001	0.491314	0.0001	0.0001	0.171876	0.237133	0.100257	0.0001
AC006547.13	0.828834	1.37604	0.37341	0.36779	0.149338	0.543171	0.232222	0.446644	0.32144	0.506063	0.274681	0.245707	0.273828	0.247717	0.515429	0.0001	0.400729	0.218892
AC006547.14	1.32607	1.37604	0.684502	0.809019	0.597053	0.543171	1.09439	1.22248	1.27398	3.0748	1.373	0.614117	1.17322	3.46674	1.37431	1.95562	0.801358	2.07863
AC006942.4	0.331593	0.0001	0.0623184	0.0783341	0.0001	0.0704632	0.0664205	0.0537288	0.0122329	0.0390202	0.0001	0.0001	0.0001	0.0001	0.0001	0.237133	0.0001	0.244215
AC006978.6	0.607838	0.786353	0.933376	0.331021	0.0001	0.319553	0.364863	0.806349	0.700162	0.661744	1.23571	0.73692	0.586661	0.495334	0.343653	0.296391	0.400729	0.984666
AC006995.8	0.392759	0.0001	0.155646	0.221593	0.000310012	0.163066	0.239321	0.165258	0.205111	0.257348	0.0687451	0.122903	0.249119	0.247717	0.0859882	0.119362	0.389471	0.148358
AC007000.12	0.276345	0.0001	0.186755	0.0001	0.0001	0.0001	0.0001	0.0767672	0.0469282	0.202659	0.274681	0.491311	0.0001	0.0001	0.0001	0.0298785	0.400729	0.0001
AC007009.1	0.276345	0.0001	0.37341	0.147176	0.149338	0.0320453	0.0995808	0.104132	0.0460057	0.467143	0.686551	0.0001	0.312933	0.0001	0.0001	0.296391	0.200414	0.0001
AC007038.7	0.165847	0.393227	0.0001	0.0736381	0.149338	0.095936	0.232222	0.104132	0.195199	0.155781	0.13739	0.122903	0.0392041	0.0001	0.0001	0.0593583	0.200414	0.109496
AC007040.11	0.373676	0.0001	0.205076	0.116829	0.311317	0.131069	0.0741745	0.137076	0.105686	0.334046	0.287816	0.0001	0.0001	0.0001	0.0001	0.0001	0.105438	0.0439514
AC007040.11	0.373676	0.0001	0.205076	0.116829	0.311317	0.131069	0.0741745	0.137076	0.105686	0.334046	0.287816	0.0001	0.0001	0.0001	0.0001	0.0001	0.105438	0.0439514
AC007040.6	0.0001	0.0001	0.124537	0.0001	0.149338	0.0320453	0.0995808	0.0261579	0.0806028	0.0001	0.0001	0.0001	0.0392041	0.0001	0.0001	0.0001	0.0001	0.0001
AC007040.6	0.0001	0.0001	0.124537	0.0001	0.149338	0.0320453	0.0995808	0.0261579	0.0806028	0.0001	0.0001	0.0001	0.0392041	0.0001	0.0001	0.0001	0.0001	0.0001
AC007040.7	0.422652	0.393227	0.301518	0.036869	0.447815	0.130208	0.128925	0.0781241	0.255002	0.228866	0.0001	0.0001	0.0783081	0.0001	0.0001	0.0001	0.0001	0.175041
AC007040.7	0.422652	0.393227	0.301518	0.036869	0.447815	0.130208	0.128925	0.0781241	0.255002	0.228866	0.0001	0.0001	0.0783081	0.0001	0.0001	0.0001	0.0001	0.175041
AC007041.2	1.12402	0.982916	1.13639	0.634327	0.750499	0.977989	0.70357	0.89467	0.833992	0.826308	1.53716	0.614117	0.669908	1.23819	0.865437	0.421089	1.74468	1.31285
AC007161.5	1.16033	0.0001	0.0001	0.661943	0.0001	0.0001	0.0332603	0.0781241	0.0460057	0.116861	0.13739	0.245707	0.0392041	0.247717	0.0001	0.118617	0.801241	0.0001
AC007163.6	0.22127	0.393227	0.124537	0.220817	0.447815	0.255663	0.0664205	0.0781241	0.0345382	0.194918	0.13739	0.123034	0.273983	0.0001	0.0001	0.118617	0.100257	0.0001
AC007228.11	0.276345	0.786353	0.0623184	0.0001	0.0001	0.191772	0.232222	0.13014	0.0919114	0.272541	0.549261	0.122903	0.117412	0.247717	0.171876	0.237133	0.0001	0.109496
AC007228.9	0.621368	1.02519	0.719049	0.335253	0.91829	0.769614	0.100727	0.722918	0.453073	0.157895	0.871784	0.374892	0.236604	0.758104	0.350801	0.181353	1.1383	1.46552
AC007229.3	2.10046	1.44619	1.43529	0.304655	0.746292	1.3897	1.29114	1.37748	1.1855	1.47225	0.581763	1.34316	0.891037	0.247717	0.763327	0.719611	1.03772	1.45847
AC007238.1	29.948	27.2888	23.8931	32.543	18.8389	18.902	22.5094	20.2274	19.2951	26.1736	21.7929	23.3455	21.094	25.8132	22.7181	21.3065	22.8039	19.3771
AC007246.3	1.54707	2.94855	1.30668	0.77225	0.447815	0.766788	0.431183	0.598285	0.539492	2.37423	2.19674	1.35094	1.17322	0.990569	0.515429	0.770458	1.4023	0.875269
AC007255.8	0.442091	0.196663	0.0623184	0.0001	0.0001	0.0320453	0.0001	0.0001	0.0230529	0.0390202	0.0001	0.122903	0.0001	0.0001	0.0001	0.0001	0.0001	0.0001
AC007256.5	1.43833	1.37604	0.671537	1.23279	1.64537	1.87931	0.436416	1.28685	1.21133	0.740234	1.78487	1.22813	1.08098	1.06445	1.89375	1.12601	1.80559	1.31495
AC007283.5	0.871424	0.000100529	0.0407502	0.000100009	0.000108009	2.44247	1.52224	0.91071	0.598642	0.000366561	0.039775	0.44409	0.0146834	0.00010009	1.39393	0.887025	0.00381139	2.35079
AC007292.3	0.50159	0.196663	0.497847	0.410469	0.298577	0.224968	0.232222	0.23132	0.320197	0.428222	0.549261	0.36851	0.156516	0.247717	0.515429	0.474166	0.100257	0.109496
AC007292.6	0.442091	0.196663	0.124801	0.147981	0.0001	0.0639907	0.0332603	0.156148	0.0689586	0.233621	0.0001	0.122903	0.0001	0.247717	0.0001	0.118617	0.301638	0.218892
AC007308.6	0.165847	0.196663	0.0623184	0.0736381	0.0001	0.0001	0.0995808	0.0781241	0.0115764	0.0390202	0.0001	0.122903	0.0783081	0.0001	0.0001	0.0001	0.100257	0.0001
AC007318.5	110.792	91.6494	98.1281	70.2258	83.9425	90.2573	90.3904	79.7474	87.6805	79.7209	64.3981	70.375	95.1873	76.8104	80.2121	86.6116	89.9572	100.344
AC007319.1	0.49734	0.196663	0.248973	0.625174	0.0001	0.095936	0.0995808	0.338247	0.126361	0.31149	0.686591	0.491314	0.19562	0.495334	0.0001	0.118617	0.100301	0.0001
AC007347.1	0.110728	0.000136956	0.000184334	0.276189	0.000104086	0.000184515	0.000108635	0.000103586	0.000857349	0.00756906	0.000990565	0.000491816	0.00222545	0.000100005	0.00222423	0.000259902	0.0433251	0.00966738
AC007362.1	16.2985	28.1087	24.5141	4.70654	6.11887	5.55859	10.4124	19.246	16.1933	31.2919	41.3245	46.5426	8.6421	6.93338	10.6502	11.674	18.0284	15.3156
AC007362.3	0.0001	0.196663	0.124537	0.0373738	0.0001	0.0001	0.0335624	0.0522513	0.069258	0.0001	0.0001	0.0001	0.0001	0.0001	0.0001	0.0600426	0.0001	0.110177
AC007382.1	0.0001	0.0001	0.0001	0.0001	0.0001	0.0639907	0.0001	0.0521161	0.0574821	0.0001	0.13739	0.245707	0.0783081	0.0001	0.0001	0.0001	0.100257	0.0001
AC007383.3	1.46787	1.07871	1.24447	0.671957	1.19401	0.415389	0.839352	0.565643	0.367346	2.07284	1.51029	1.10533	0.925694	0.990569	1.20253	0.829716	0.400729	0.0616314
AC007387.2	1.38132	0.393227	0.248973	0.331021	0.149338	0.575116	0.298542	0.728325	0.195199	0.389302	0.686551	0.491314	0.508453	0.247717	0.343653	0.296391	0.300572	0.218892
AC007395.4	0.0553489	0.0001	0.0623184	0.0001	0.149338	0.0320453	0.0332603	0.0781241	0.080435	0.155781	0.13739	0.122903	0.0783081	0.247717	0.0001	0.0593583	0.0001	0.109496
AC007395.4	0.0553489	0.0001	0.0623184	0.0001	0.149338	0.0320453	0.0332603	0.0781241	0.080435	0.155781	0.13739	0.122903	0.0783081	0.247717	0.0001	0.0593583	0.0001	0.109496
AC007401.2	0.110598	0.0001	0.0001	0.036869	0.0001	0.0639907	0.0001	0.0001	0.0689586	0.0779404	0.0001	0.0001	0.0001	0.0001	0.0001	0.0593583	0.0001	0.0001
AC007551.3	0.110598	0.58979	0.311192	0.0001	0.149338	0.0639907	0.0995808	0.182156	0.0919114	0.350382	0.13739	0.122903	0.0001	0.0001	0.171876	0.0001	0.100257	0.109496
AC007560.1	2.53995	0.196663	0.451263	1.0758	0.89553	0.354648	1.22703	0.702317	0.536386	1.08987	0.549261	0.614117	0.354161	0.0001	0.359849	0.716457	0.601043	1.10691
AC007566.10	0.193931	0.218851	0.0001	0.0001	0.0001	0.0686719	0.0001	0.0864159	0.15297	0.222086	0.515022	0.122903	0.287663	0.0001	0.171876	0.184167	0.0001	0.437685
AC007620.3	17.704	21.8085	22.241	19.6403	23.3424	21.9289	22.873	25.0276	23.0875	43.5979	47.79	40.2844	45.3796	44.1531	53.8265	51.9487	54.5833	56.5272
AC007690.1	0.442091	0.196663	0.435629	0.183945	0.0001	0.319553	0.364863	0.468244	0.401775	0.311462	0.411971	0.245707	0.0392041	0.0001	0.343653	0.296391	0.400729	0.218892
AC007743.1	15.9647	22.353	14.3486	4.81628	5.96963	7.4614	8.67651	11.6069	11.5404	16.2496	16.1364	13.1941	9.94923	6.19053	9.59618	10.1602	18.8866	11.5859
AC007879.2	0.0553489	0.0001	0.0001	0.294252	0.0001	0.0639907	0.0995808	0.0001	0.0001	0.0001	0.0001	0.0001	0.0001	0.247717	0.0001	0.0001	0.0001	0.0001
AC007879.5	0.0553489	0.0001	0.0001	0.0001	0.149338	0.0001	0.0001	0.104132	0.0749837	0.0001	0.0001	0.0001	0.0392041	0.0001	0.0001	0.0001	0.0001	0.0001
AC007879.7	0.0001	0.0001	0.0001	0.404559	0.0001	0.223717	0.132741	0.156148	0.108839	0.0001	0.0001	0.0001	0.0783081	0.0001	0.0001	0.0593583	0.0001	0.0001
AC007899.3	0.129548	0.0001	0.0709078	0.410892	0.0001	0.451854	0.220678	0.0549005	0.238979	0.0001	0.25144	0.248484	0.0787441	0.0001	0.171876	0.199494	0.620075	0.109496
AC007952.5	1.21558	2.1623	2.73771	0.478098	0.0716078	1.11819	1.72443	1.78858	1.87076	3.89163	3.32386	4.91224	1.25143	0.742952	1.88964	3.08153	2.26742	3.93836
AC007952.6	0.375797	0.602099	0.435221	0.0819546	0.0397766	0.18828	0.434738	0.177252	0.410467	0.18086	0.607308	0.632766	0.304509	0.000112281	0.344532	0.467968	0.0157686	0.589831
AC007969.5	77.9326	62.7722	57.4342	70.7149	59.0251	48.0205	57.1276	57.7385	52.4358	54.5365	50.1871	44.7467	43.923	58.2072	49.028	45.7502	53.7121	46.0915
AC008132.12	3.61249	4.35875	2.3219	2.10702	3.26233	3.22393	3.53899	3.06312	2.96621	2.74513	2.70075	3.26289	4.2667	5.34181	4.24772	3.95055	4.89604	3.94683
AC008155.1	0.0553489	0.0001	0.0001	0.294252	0.0001	0.0320453	0.0001	0.0521161	0.0230529	0.116861	0.13739	0.0001	0.0001	0.247717	0.0001	0.0001	0.0001	0.0001
AC008268.2	0.0415717	0.000100035	0.00010005	0.0001	0.149338	0.151379	0.0432325	0.158644	0.0913207	0.11235	0.274643	0.0515984	0.0001	0.0001	0.000429719	0.00112153	0.100257	0.403744
AC008427.2	0.99458	0.196663	0.871157	0.331021	0.149338	0.575116	0.563825	0.520261	0.96412	0.389302	0.549261	0.491314	0.391141	0.247717	0.687206	1.12601	0.200414	1.09406
AC008443.1	0.00028073	0.0511333	0.218402	0.00121871	0.0568162	0.368626	0.475274	0.895513	0.819598	0.653891	4.14528	0.244912	0.819543	3.30309	1.35124	0.858052	0.281161	2.80555
AC008738.1	0.0798131	0.393208	0.0001	0.0001	0.298563	0.0001	0.0332587	0.0376244	0.0001	0.112308	0.0001	0.0001	0.0783045	0.319384	0.0001	0.0001	0.0001	0.0001
AC008753.3	0.0553489	0.0001	0.0001	0.0736381	0.0001	0.0001	0.0001	0.104132	0.0345293	0.0779404	0.13739	0.245707	0.0783081	0.0001	0.0001	0.0001	0.100257	0.0001
AC008937.2	0.0001	0.0001	0.0001	0.0390378	0.153066	0.0001	0.0001	0.0566347	0.0720165	0.0001	0.0001	0.0001	0.0411352	0.0001	0.0001	0.0600826	0.0001	0.122053
AC008937.3	0.0001	0.0001	0.0001	0.0001	0.0001	0.0320453	0.0995808	0.0521161	0.0345293	0.116861	0.0001	0.0001	0.0001	0.0001	0.0001	0.0001	0.300572	0.0001
AC008982.2	0.165847	0.196663	0.0623184	0.0736381	0.0001	0.0639907	0.0332603	0.0521161	0.0689586	0.0779404	0.549261	0.122903	0.0001	0.0001	0.343653	0.237133	0.100257	0.0001
AC009005.2	0.939331	0.786353	0.0001	0.036869	0.149338	0.191772	0.298542	0.13014	0.126341	0.467143	0.0001	0.0001	0.19562	0.0001	0.0001	0.177875	0.200414	0.0001
AC009065.1	0.985514	0.000100093	0.0031696	1.91186	1.00124	0.529855	0.326981	0.265772	0.303998	0.559603	0.289847	0.443829	0.53772	3.34229	1.42718	0.001213	0.806953	0.652016
AC009095.4	0.0001	0.0001	0.0001	0.036869	0.0001	0.0001	0.0001	0.0781241	0.0345293	0.0001	0.13739	0.122903	0.0783081	0.0001	0.0001	0.0001	0.0001	0.0001
AC009120.3	0.276345	0.0001	0.0623184	0.220714	0.149338	0.0320453	0.0664205	0.0781241	0.0460057	0.194701	0.549261	0.36851	0.0783081	0.0001	0.0001	0.0001	0.0001	0.0001
AC009120.5	0.0001	0.0001	0.0623184	0.147176	0.0001	0.095936	0.0332603	0.156148	0.080435	0.0390202	0.13739	0.122903	0.156516	0.0001	0.0001	0.0001	0.0001	0.0001
AC009120.6	0.777371	0.0001	0.297071	0.712173	1.32913	0.719167	0.498649	0.445126	0.798613	0.820886	0.634107	0.552917	0.67251	0.766567	0.989429	0.931237	0.824675	1.35
AC009133.12	0.663087	0.58979	0.622284	0.183945	0.447815	0.287608	0.497504	0.598285	0.401775	0.506063	0.686551	0.36851	0.117412	0.247717	0.171876	0.35565	0.100257	0.109496
AC009133.14	1.68166	3.75987	3.07579	1.58623	1.73575	2.87756	2.32081	1.92823	1.89001	3.90694	2.83728	2.24408	2.99128	3.91417	2.27202	2.49035	2.9158	1.30483
AC009237.8	0.552589	0.982916	0.560065	0.0736381	0.0001	0.447335	0.548257	0.806349	0.806636	0.661744	0.549261	0.245707	0.239347	0.0001	0.687206	0.33761	0.801358	1.20346
AC009245.3	14.768	12.8107	11.0757	16.2761	7.50343	7.0197	8.93048	8.40481	8.94861	9.8029	9.96961	6.44787	6.97112	12.3923	9.95828	6.74	8.81288	6.44577
AC009299.3	0.0001	0.196663	0.0001	0.0001	0.0001	0.0001	0.0332603	0.0781241	0.0115764	0.0779404	0.13739	0.0001	0.0392041	0.0001	0.0001	0.0001	0.0001	0.0001
AC009299.5	3.08312	2.30276	2.66456	4.57617	1.09159	2.33947	2.71529	1.42632	1.85255	2.7942	0.998873	1.13296	2.37839	1.91842	2.53073	1.28052	2.17014	1.87897
AC009302.2	4.08604	4.67435	3.00385	6.69945	1.06171	3.38168	3.70398	2.8636	2.94839	2.77036	2.37077	4.18737	3.93621	5.20006	3.44561	4.20722	3.28186	2.93498
AC009336.24	1.63005	0.982916	0.808939	0.4082	0.149338	0.427819	0.407907	0.338204	0.590773	1.67666	0.60537	2.73751	0.995703	0.495334	1.6486	1.89229	0.416963	1.77046
AC009362.2	0.221096	0.196663	0.124537	0.220714	0.149338	0.095936	0.0664205	0.338204	0.114864	0.233621	0.0001	0.122903	0.0392041	0.0001	0.0001	0.0001	0.400729	0.109496
AC009403.2	2.04431	2.55542	1.30669	1.36055	0.447815	1.0543	1.55863	1.19647	0.895262	1.47907	2.19674	1.59654	1.05591	0.495334	0.858982	1.36304	1.00167	0.875269
AC009404.2	0.442091	0.58979	0.808939	0.809019	1.79096	1.08624	0.0664205	0.988405	0.665733	0.739584	2.47132	1.22813	0.938598	3.21912	1.54609	0.533425	1.50246	1.20346
AC009413.2	0.165847	0.0001	0.186924	0.0384097	0.0001	0.0320453	0.132741	0.0781241	0.0487212	0.170001	0.274681	0.0001	0.0001	0.0001	0.0001	0.177875	0.100257	0.218892
AC009469.1	0.000894287	0.0167625	1.60302	0.00560284	0.00791864	0.199397	0.00317165	0.00339231	0.156202	0.209956	0.0481759	0.043424	0.332599	0.0508002	1.44999	1.3884	0.0649306	0.000130698
AC009501.4	0.356287	0.982916	0.248973	0.110407	0.298577	0.0340645	0.199062	0.026108	0.16077	0.311462	0.686551	0.36851	0.0392041	0.0001	0.515429	0.296391	0.100257	0.0001
AC009505.2	0.724037	0.196663	0.325574	0.345777	0.0001	0.273897	0.53556	0.778535	0.488432	0.414419	0.300364	0.250941	0.457973	0.811271	0.179223	0.449297	0.637569	0.226678
AC009506.1	2.32527	3.07739	2.20163	1.63179	4.14283	2.8407	0.91401	1.00722	0.640035	2.90207	5.80367	3.2298	2.9627	4.5918	2.26102	1.10811	1.58194	0.638645
AC009506.2	1.41892	2.13358	0.965427	1.38346	1.15114	1.27062	1.62486	1.56733	1.28048	1.1129	1.84258	1.49586	1.07579	0.4599	1.25201	1.58958	1.98244	1.19576
AC009945.4	0.110598	0.0001	0.0001	0.0001	0.0001	0.0639907	0.0995808	0.026108	0.0345293	0.0001	0.0001	0.122903	0.117412	0.0001	0.0001	0.0001	0.100257	0.218892
AC009948.5	8.83992	10.6145	9.95504	5.66253	3.43258	4.98357	5.63735	7.10029	6.47281	7.55062	12.6308	9.57876	6.21765	7.42862	6.5276	6.34074	5.20828	5.90749
AC009948.7	0.812325	0.197932	0.311192	0.886216	0.345963	0.546385	0.579887	0.731606	0.615609	0.433487	0.691155	0.370289	0.573379	0.0001	0.459809	0.29805	0.461043	1.39431
AC009950.2	0.110598	0.196663	0.0623187	0.110407	0.239099	0.0320453	0.17119	0.172643	0.344325	0.283646	1.35072	0.122903	0.0392041	0.0001	0.172982	0.133155	0.332512	0.61495
AC009951.1	0.0001	0.0001	0.0001	0.0001	0.149338	0.0001	0.0332603	0.0619653	0.103388	0.0390202	0.13739	0.0001	0.0001	0.0001	0.0001	0.0593583	0.0001	0.109496
AC009961.3	0.0553489	0.393227	0.124537	0.183945	0.298577	0.159827	0.165901	0.104132	0.229629	0.583903	0.274681	0.245707	0.469349	0.495334	0.171876	0.474166	0.200414	0.0001
AC009963.5	0.182541	0.395583	0.0001	0.0371403	0.0001	0.0322408	0.0336355	0.202635	0.15011	0.156679	0.137606	0.0001	0.0786954	0.252339	0.0001	0.0914578	0.100642	0.110359
AC010084.1	1.43657	0.0001	1.24447	0.882557	0.0001	0.639007	0.596985	0.0001	0.746068	2.33531	0.0001	1.35094	1.09501	0.0001	1.71786	1.30378	0.0001	1.20346
AC010136.2	0.276345	0.0001	0.0001	0.0001	0.0001	0.0639907	0.0001	0.0001	0.0115764	0.116861	0.0001	0.122903	0.0001	0.0001	0.0001	0.118617	0.0001	0.0001
AC010226.4	0.350869	0.219295	0.263354	1.05706	0.666195	0.531908	0.458357	0.324013	0.395995	0.131642	0.1504	0.0001	0.7897	0.0001	0.171884	0.264979	0.437787	0.125026
AC010240.3	0.165847	0.0001	0.0001	0.478098	0.149338	0.0639907	0.165901	0.0001	0.0230529	0.233621	0.411971	0.0001	0.0001	0.0001	0.0001	0.0001	0.200414	0.0001
AC010327.2	0.94602	0.535259	0.467004	0.485555	1.04999	0.459657	0.475696	0.802121	0.834666	1.17066	0.982534	0.854403	0.741606	0.534915	0.19443	0.463106	1.16741	0.954661
AC010336.1	0.686762	0.000101297	0.000100008	0.199392	0.000100985	0.671904	0.316825	0.432404	0.307132	0.34385	0.568909	1.3629	0.562404	0.000100981	0.687202	0.000100046	0.000100001	0.000101155
AC010441.1	1.43616	1.96517	1.67952	0.0368586	0.149296	0.0639725	0.165854	0.0261006	0.0230463	2.56811	1.23536	2.08716	0.860145	0.247647	0.0001	0.829481	0.200358	0.656291
AC010468.1	33.0813	24.9761	16.6897	18.6534	12.7998	17.6386	15.849	21.5134	15.9169	19.8411	16.3327	14.3672	11.9963	9.71457	13.5454	11.9443	15.5804	11.2001
AC010492.2	0.663087	0.786353	0.124537	0.442373	0.0001	0.191955	0.165901	0.182156	0.206751	0.399566	0.823842	0.122903	0.312933	0.0001	0.343653	0.177875	0.400729	0.218892
AC010492.2	0.663087	0.786353	0.124537	0.442373	0.0001	0.191955	0.165901	0.182156	0.206751	0.399566	0.823842	0.122903	0.312933	0.0001	0.343653	0.177875	0.400729	0.218892
AC010492.2	0.663087	0.786353	0.124537	0.442373	0.0001	0.191955	0.165901	0.182156	0.206751	0.399566	0.823842	0.122903	0.312933	0.0001	0.343653	0.177875	0.400729	0.218892
AC010492.2	0.663087	0.786353	0.124537	0.442373	0.0001	0.191955	0.165901	0.182156	0.206751	0.399566	0.823842	0.122903	0.312933	0.0001	0.343653	0.177875	0.400729	0.218892
AC010522.1	0.442263	0.0001	0.0623184	0.257483	0.298577	0.127881	0.0664205	0.156148	0.0919114	0.116904	0.274681	0.0001	0.117412	0.0001	0.0001	0.0001	0.200414	0.0001
AC010524.2	0.0001	0.0001	0.0623184	0.036869	0.0001	0.191772	0.0332603	0.104132	0.0689586	0.0779404	0.0001	0.0001	0.0783081	0.0001	0.0001	0.0593583	0.0001	0.0001
AC010525.4	0.0001	0.0001	0.0001	0.0001	0.0001	0.0639907	0.0995808	0.0001	0.0919114	0.155781	0.0001	0.0001	0.0001	0.0001	0.0001	0.0001	0.100257	0.0001
AC010525.7	0.0001	0.0001	0.0623184	0.294252	0.0001	0.095936	0.132741	0.0521161	0.0919114	0.0390202	0.0001	0.0001	0.0001	0.0001	0.0001	0.177875	0.0001	0.0001
AC010536.1	0.110598	0.0001	0.560065	0.331021	0.0001	0.255663	0.431184	0.286188	0.516539	0.350382	0.274681	0.859724	0.508453	1.23819	0.343653	0.177875	0.400729	0.656477
AC010547.9	1.87507	1.31278	0.294995	0.303596	0.000100423	0.000164481	0.32604	0.412646	0.579351	0.799945	0.48142	1.90845	0.429694	0.000100001	0.958631	0.000171082	0.386273	0.747539
AC010642.1	1.56435	1.44972	1.152	0.762143	0.000100005	0.853376	1.36101	1.7478	1.0612	0.786581	0.759074	0.000101111	1.75282	3.62567	1.6175	1.47529	1.40088	0.841018
AC010642.2	0.110598	0.0001	0.124537	0.110407	0.149338	0.287608	0.0664205	0.156148	0.126341	0.0001	0.411971	0.245707	0.0001	0.0001	0.0001	0.0001	0.100257	0.0001
AC010677.5	0.221096	0.0001	0.124537	0.036869	0.0001	0.0639907	0.0332603	0.104132	0.0345293	0.0779404	0.0001	0.0001	0.0001	0.0001	0.171876	0.0001	0.0001	0.0001
AC010733.5	0.386842	0.393227	0.124537	0.699153	0.298577	0.127881	0.199139	0.364212	0.195199	0.194701	0.274681	0.122903	0.312933	0.742952	0.171876	0.0001	0.300572	0.218892
AC010761.13	0.0553489	0.196663	0.248973	0.036869	0.0001	0.0639907	0.0664205	0.104132	0.0345293	0.0390202	0.0001	0.122903	0.156516	0.0001	0.171876	0.118617	0.300572	0.0001
AC010761.8	0.688289	3.23989	1.52364	2.1045	1.98685	1.80232	1.80355	1.88707	1.59962	1.20365	1.57612	2.266	1.39419	1.491	1.40442	1.33797	2.17904	2.12356
AC010761.9	0.165846	0.0001	0.0623168	0.000100009	0.149338	0.0282118	0.000101095	0.121159	0.158193	0.375717	0.823842	0.0001	0.0001	0.0001	0.687205	0.000104346	0.801358	0.547081
AC010878.3	0.663087	0.982916	0.809491	0.845788	0.298577	0.447335	0.530874	0.598447	0.53963	0.666464	0.274681	0.122903	0.430245	0.495334	0.858982	0.237133	0.300824	0.656477
AC010894.3	0.0553489	0.0001	0.0001	0.036869	0.0001	0.0001	0.0332603	0.0781241	0.0689586	0.0001	0.0001	0.0001	0.117412	0.0001	0.0001	0.0001	0.0001	0.0001
AC010970.2	46.6854	75.0873	240.785	9.81743	204.307	280.64	182.249	155.008	271.429	196.353	205.798	139.136	218.514	27.7332	21.4722	209.715	104.264	50.4317
AC010976.2	0.0567228	0.0001	0.188473	0.0741538	0.0001	0.0323403	0.0333306	0.0792147	0.023235	0.157668	0.0001	0.0001	0.0001	0.495334	0.0001	0.0598174	0.100257	0.0001
AC010980.2	0.110598	0.0001	0.0623184	0.279437	1.55463	0.710857	0.265382	0.361333	0.183723	0.0390202	0.0001	0.0001	0.252823	0.0001	1.03076	0.0001	0.0001	0.0001
AC011242.6	1.27082	0.393227	0.684502	0.0736381	0.298577	0.127881	0.497504	0.182156	0.206676	0.661744	0.549261	0.122903	0.312933	0.0001	0.0001	0.296391	0.300572	0.218892
AC011290.5	0.276345	0.196663	0.311192	0.147176	0.597053	0.0639907	0.265382	0.208164	0.229629	0.272541	0.411971	0.245707	0.312933	0.247717	0.687206	0.35565	0.801358	0.437685
AC011306.2	4.19902	2.1623	4.97757	3.75054	1.34325	3.13074	1.65811	1.11845	2.7774	1.67367	0.13739	2.33336	1.72068	2.22866	1.88964	1.30378	0.601043	2.18802
AC011330.5	1.42377	0.00261559	0.694374	0.232894	0.000100309	0.999414	0.296344	0.000108442	1.38497	1.96683	0.000645266	1.13143	1.61528	0.966879	2.65301	0.753755	0.000100003	1.83335
AC011385.1	0.0001	0.393227	0.0001	0.0001	0.149338	0.0639907	0.0664205	0.156148	0.080435	0.0390202	0.0001	0.0001	0.156516	0.247717	0.0001	0.0001	0.200414	0.328289
AC011484.1	0.0151313	0.0786779	0.0871907	0.0001	0.0001	0.0001	0.358095	0.000100003	0.0345293	0.000234323	0.13739	0.0001	0.0106852	0.0001	0.0001	0.237062	0.0401387	0.0001
AC011526.1	10.8289	21.2289	10.8883	7.97899	9.40212	7.47531	8.22384	10.3513	9.46818	26.2713	26.7717	25.1748	17.5578	19.8095	17.1777	20.1479	18.6293	17.0659
AC011526.1	10.8289	21.2289	10.8883	7.97899	9.40212	7.47531	8.22384	10.3513	9.46818	26.2713	26.7717	25.1748	17.5578	19.8095	17.1777	20.1479	18.6293	17.0659
AC011530.4	0.0774182	0.0001	0.000103712	0.0484501	0.168158	0.0768354	0.0001	0.119481	0.0123756	0.0001	0.160137	0.0001	0.0001	0.0001	0.0001	0.0001	0.0001	0.120457
AC011737.2	183.554	184.073	129.688	190.752	137.886	112.506	133.601	147.071	119.82	101.568	114.276	79.762	85.8534	120.798	78.2024	79.7305	91.5268	73.9626
AC011933.2	0.933421	0.0001	0.20463	0.339205	0.152925	0.10803	0.21541	0.0898091	0.102609	0.0789864	0.192098	0.249308	0.0553465	0.0001	0.257515	0.0001	0.582508	0.0001
AC012065.7	37.4895	8.64888	4.79088	23.5606	9.25288	10.542	40.6264	6.44305	4.39557	22.7638	8.20824	2.94694	7.939	0.247717	0.6514	12.0206	3.40544	0.982475
AC012066.1	0.57587	1.37604	0.124537	0.70805	1.19401	0.447335	0.681443	0.676309	0.68949	0.194701	0.13739	0.36851	0.28711	1.23819	0.230214	0.533425	1.04152	0.465627
AC012146.7	1.13275	0.786353	1.12003	0.293854	0.298562	0.474319	0.594278	0.312196	0.457199	0.856345	0.0001	1.10533	0.117412	0.247717	0.171876	0.948233	0.400729	0.984666
AC012309.5	0.0001	0.196663	0.0001	0.0736381	0.149338	0.0320453	0.0995808	0.0781241	0.0574821	0.116861	0.0001	0.122903	0.0001	0.0001	0.0001	0.0593583	0.0001	0.0001
AC012314.8	1.7864	1.59569	1.69161	1.44662	0.15014	0.966724	1.34594	1.67574	1.35441	1.81476	1.92723	1.11554	1.06768	1.9892	1.21087	1.67303	1.41418	1.99367
AC012314.8	1.7864	1.59569	1.69161	1.44662	0.15014	0.966724	1.34594	1.67574	1.35441	1.81476	1.92723	1.11554	1.06768	1.9892	1.21087	1.67303	1.41418	1.99367
AC012314.8	1.7864	1.59569	1.69161	1.44662	0.15014	0.966724	1.34594	1.67574	1.35441	1.81476	1.92723	1.11554	1.06768	1.9892	1.21087	1.67303	1.41418	1.99367
AC012314.8	1.7864	1.59569	1.69161	1.44662	0.15014	0.966724	1.34594	1.67574	1.35441	1.81476	1.92723	1.11554	1.06768	1.9892	1.21087	1.67303	1.41418	1.99367
AC012314.8	1.7864	1.59569	1.69161	1.44662	0.15014	0.966724	1.34594	1.67574	1.35441	1.81476	1.92723	1.11554	1.06768	1.9892	1.21087	1.67303	1.41418	1.99367
AC012314.8	1.7864	1.59569	1.69161	1.44662	0.15014	0.966724	1.34594	1.67574	1.35441	1.81476	1.92723	1.11554	1.06768	1.9892	1.21087	1.67303	1.41418	1.99367
AC012314.8	1.7864	1.59569	1.69161	1.44662	0.15014	0.966724	1.34594	1.67574	1.35441	1.81476	1.92723	1.11554	1.06768	1.9892	1.21087	1.67303	1.41418	1.99367
AC012314.8	1.7864	1.59569	1.69161	1.44662	0.15014	0.966724	1.34594	1.67574	1.35441	1.81476	1.92723	1.11554	1.06768	1.9892	1.21087	1.67303	1.41418	1.99367
AC012314.8	1.7864	1.59569	1.69161	1.44662	0.15014	0.966724	1.34594	1.67574	1.35441	1.81476	1.92723	1.11554	1.06768	1.9892	1.21087	1.67303	1.41418	1.99367
AC012314.8	1.7864	1.59569	1.69161	1.44662	0.15014	0.966724	1.34594	1.67574	1.35441	1.81476	1.92723	1.11554	1.06768	1.9892	1.21087	1.67303	1.41418	1.99367
AC012354.8	2.92829	1.37604	1.43112	2.72101	1.9402	2.26822	2.28816	2.28881	2.41015	2.8802	0.686551	1.59654	1.25143	1.4858	1.20253	1.83711	2.70435	2.29742
AC012358.4	0.276345	0.393227	0.0623184	0.0736381	0.149338	0.0639907	0.199062	0.156148	0.126341	0.0779404	0.13739	0.0001	0.0783081	0.0001	0.343653	0.0593583	0.100257	0.109496
AC012358.7	0.0553489	0.0001	0.186755	0.036869	0.0001	0.0320453	0.0332603	0.0521161	0.195199	0.0779404	0.274681	0.491314	0.0392041	0.0001	0.0001	0.0001	0.0001	0.0001
AC012358.8	0.113661	0.197692	0.12578	0.258456	0.0001	0.160273	0.0666889	0.131073	0.0926503	0.157151	0.274681	0.122903	0.0392041	0.247717	0.171876	0.178055	0.0001	0.0001
AC012360.6	0.939331	0.982916	0.684502	0.147176	1.34325	0.383444	0.398023	0.39022	0.413251	0.194701	0.961132	0.491314	0.0783081	0.247717	0.687206	0.474166	0.901515	0.0001
AC012493.1	0.0553489	0.0001	0.0001	0.0001	0.0001	0.0001	0.0508638	0.026108	0.0345293	0.0471096	0.0001	0.0001	0.117412	0.0001	0.0001	0.0001	0.0001	0.0001
AC012531.25	0.0001	0.58979	0.311192	0.0001	0.149338	0.255663	0.0332603	0.0781241	0.195199	0.116861	0.13739	0.73692	0.0001	0.0001	0.0001	0.0001	0.300572	0.875269
AC012613.2	0.110598	0.0001	0.124537	0.036869	0.149338	0.0001	0.0664205	0.026108	0.0115764	0.0779404	0.13739	0.0001	0.0001	0.0001	0.343653	0.0001	0.100257	0.0001
AC012615.1	1.16379	0.148203	0.530255	6.24621	0.00015432	0.200904	0.127112	0.00425249	0.0386812	0.318315	0.0157759	0.000539031	0.0140836	1.32583	5.24422	0.00603883	0.000225389	0.00622495
AC012668.2	0.0553489	0.0001	0.0001	0.0001	0.0001	0.0320453	0.0332603	0.0781241	0.0230529	0.0779404	0.0001	0.0001	0.117412	0.0001	0.171876	0.0001	0.0001	0.0001
AC013269.1	0.647825	0.507439	0.413378	0.555286	0.0001	0.247608	0.354097	0.493436	0.273455	0.459355	0.712179	0.0001002	0.0001	0.343521	1.65309	0.215438	1.33986	0.476706
AC013271.3	3.0271	7.56181	3.91604	2.67896	2.82408	1.81054	2.89171	3.09762	1.82392	4.97059	7.63294	4.39269	3.13723	3.09131	2.30637	4.64944	8.65388	2.81695
AC013394.2	18.4011	18.8702	21.0366	12.9062	17.7595	17.4736	16.595	16.8047	17.5547	22.9312	23.614	21.9815	22.1016	17.8285	22.6718	19.2148	19.7111	23.5203
AC013444.1	0.0001	0.0001	0.0001	0.036869	0.0001	0.0639907	0.0664205	0.182156	0.0345293	0.0001	0.0001	0.0001	0.0001	0.0001	0.0001	0.0001	0.0001	0.0001
AC013449.1	2.66086	1.96573	2.0243	1.86274	0.746292	1.98569	1.55353	1.8402	1.46597	1.5	1.78487	1.35094	1.73558	0.990569	1.20253	1.69082	2.14835	1.82919
AC013470.6	1.12335	1.97058	1.18311	1.34979	1.29912	0.994449	1.31975	1.19092	0.701109	1.32112	1.30134	0.614977	0.898681	0.744483	0.957957	1.02492	1.8788	0.687681
AC013717.3	0.0553603	0.0001	0.0624468	0.147176	0.0001	0.15986	0.0664323	0.104192	0.126389	0.116861	0.274681	0.0001	0.0001	0.0001	0.0001	0.0001	0.400729	0.0001
AC013733.5	0.110598	0.0001	0.0001	0.110407	0.0001	0.0321449	0.0001	0.0521897	0.0345686	0.0001	0.274681	0.122903	0.0392041	0.495334	0.171876	0.0593583	0.300572	0.0001
AC015688.3	2.18876	2.98671	1.73088	5.18424	2.17455	1.42455	3.81198	2.57075	2.37849	1.10369	0.0001	0.0001	0.371766	0.881333	1.6463	0.711998	0.813291	1.17109
AC015849.14	1.26198	1.6132	0.901302	3.0557	3.48598	1.71409	1.32683	1.61442	1.39418	1.06355	0.668534	0.778972	1.53035	2.03919	0.858982	1.33146	1.28826	0.828794
AC015849.14	1.26198	1.6132	0.901302	3.0557	3.48598	1.71409	1.32683	1.61442	1.39418	1.06355	0.668534	0.778972	1.53035	2.03919	0.858982	1.33146	1.28826	0.828794
AC015849.19	0.110598	0.393227	0.0623184	0.220714	0.0001	0.095936	0.0664205	0.0521161	0.080435	0.116861	0.274681	0.122903	0.234724	0.247717	0.0001	0.0001	0.200414	0.109496
AC015849.19	0.110598	0.393227	0.0623184	0.220714	0.0001	0.095936	0.0664205	0.0521161	0.080435	0.116861	0.274681	0.122903	0.234724	0.247717	0.0001	0.0001	0.200414	0.109496
AC015971.2	0.726974	0.668451	0.496723	0.418692	0.903761	0.399711	0.39504	0.554817	0.340555	0.425571	0.410654	0.0001	0.328994	0.542478	0.806493	0.732138	0.295768	0.601119
AC015987.1	0.0001	0.0001	0.0001	0.0736381	0.0001	0.0320453	0.165901	0.0001	0.0001	0.0001	0.13739	0.0001	0.117412	0.0001	0.0001	0.0001	0.0001	0.0001
AC015987.2	0.450858	1.45776	4.58997	0.0576674	1.43892	2.29818	3.30382	3.82067	3.90644	1.4392	8.51222	3.32693	6.92314	0.00279735	4.7957	6.27647	3.29309	3.37047
AC016292.3	1.05787	2.62006	1.52652	0.390317	1.70489	1.28244	1.28304	1.25656	1.13806	1.04776	1.18404	1.35094	0.674718	1.23819	1.12035	1.11368	0.500886	1.73138
AC016582.2	0.110598	0.0001	0.0001	0.036869	0.0001	0.0001	0.0001	0.0001	0.0001	0.272541	0.0001	0.0001	0.0001	0.0001	0.0001	0.0001	0.0001	0.0001
AC016586.1	0.165847	0.196663	0.0623184	0.0736381	0.0001	0.287608	0.0664205	0.286188	0.103388	0.194701	0.686551	0.36851	0.273828	0.0001	0.343653	0.0001	0.100257	0.109496
AC016629.3	0.0001	0.0001	0.134611	0.0465437	0.0001	0.0001	0.0379108	0.0592781	0.0548917	0.0001	0.0001	0.0001	0.0855056	0.0001	0.192481	0.0001	0.0001	0.0001
AC016629.8	1.43892	0.982916	0.865091	1.0427	0.700146	0.255663	0.554419	0.657664	0.439676	0.675142	1.37344	0.796139	0.368973	0.247717	0.0001	0.233498	0.313105	0.0001
AC016691.2	0.276345	0.196663	0.0001	0.0736381	0.0001	0.287608	0.165901	0.13014	0.0689586	0.0779404	0.0001	0.0001	0.0392041	0.247717	0.0001	0.0593583	0.0001	0.109496
AC016700.5	0.165847	0.0001	0.186755	0.183945	0.0001	0.0639907	0.232222	0.026108	0.0689586	0.194701	0.0001	0.0001	0.0783081	0.0001	0.343653	0.0593583	0.100257	0.328289
AC016708.2	0.372448	0.594203	0.313649	0.183178	0.0001	0.232636	0.0614114	0.551622	0.155921	0.224824	0.137719	0.247187	0.0393649	0.0001	0.346469	0.240122	0.471906	0.220773
AC016712.2	1.18268	1.07272	0.514346	0.534068	0.118339	0.363352	0.382813	0.865938	0.566037	0.424846	0.443932	0.0358564	0.13014	0.247717	0.657752	0.327535	0.482927	0.289937
AC016716.1	1.60288	1.35545	1.3506	1.57537	2.08611	1.47885	1.2586	1.7734	1.38671	0.879635	1.08511	1.42605	1.04503	2.47627	0.832812	1.08305	1.40572	1.2935
AC016722.4	0.478423	0.540169	0.271231	0.434764	0.149992	0.687858	0.108939	0.440733	0.417986	0.591209	0.795212	0.658351	0.123086	0.990569	1.6223	0.674061	0.590826	0.0001
AC016732.2	0.331593	0.58979	0.808939	0.375427	1.04477	0.862624	0.63168	0.806349	0.609356	0.547958	0.274681	0.0001	0.352037	0.742952	1.20253	1.07224	1.00167	0.656477
AC016734.2	17.4364	11.9509	13.3601	17.2995	13.6344	16.3054	25.3236	21.5462	21.184	15.596	12.0385	15.4435	17.1613	15.8342	16.0303	21.4701	21.0639	21.7686
AC016738.4	1.04947	1.97219	0.819741	0.383651	0.170683	0.213439	0.403948	1.13895	0.642671	1.29068	1.80378	0.77138	1.33605	1.79278	1.65091	1.08986	1.12245	1.05643
AC016739.2	40.4863	36.1272	28.1256	24.3102	33.4502	27.9375	32.8107	29.2861	27.3801	35.0032	31.7804	25.4017	26.3034	24.2048	27.1201	29.4405	27.4534	28.4969
AC016747.3	11.0499	8.45232	9.08398	4.66977	7.46202	5.90999	10.4787	10.2473	8.74513	9.65232	8.5121	7.1227	6.10033	6.19053	6.01228	7.17035	6.91095	6.01689
AC016757.3	0.773585	0.0001	0.311192	0.331021	0.149338	0.095936	0.729626	0.26018	0.172246	0.778504	0.411971	0.245707	0.469349	0.0001	0.171876	0.7112	0.100257	0.0001
AC016773.1	1.17814	0.239864	0.832753	0.530768	0.610062	0.614367	0.433662	0.316223	0.380867	1.30469	1.373	0.847983	0.354205	0.742952	0.200299	0.858219	0.405131	0.121899
AC016831.7	0.0001	0.0001	0.0623184	0.0736381	0.0001	0.0320453	0.0332603	0.026108	0.114864	0.0001	0.0001	0.245707	0.234724	0.0001	0.171876	0.0593583	0.100257	0.109496
AC016831.7	0.0001	0.0001	0.0623184	0.0736381	0.0001	0.0320453	0.0332603	0.026108	0.114864	0.0001	0.0001	0.245707	0.234724	0.0001	0.171876	0.0593583	0.100257	0.109496
AC017002.1	0.0553489	0.0001	0.0623184	0.0736381	0.149338	0.0001	0.0332603	0.0781241	0.0574821	0.0001	0.0001	0.0001	0.0392041	0.0001	0.0001	0.0001	0.0001	0.0001
AC017074.2	0.276345	0.393227	0.0623184	0.036869	0.0001	0.0639907	0.0664205	0.156148	0.0230529	0.0001	0.0001	0.245707	0.0392041	0.0001	0.0001	0.35565	0.0001	0.0001
AC017081.2	0.282303	0.216335	0.124537	0.0001	0.0001	0.0001	0.0001	0.0001	0.0460057	0.197064	0.143309	0.36851	0.0001	0.0001	0.0001	0.0001	0.100257	0.0001
AC017101.10	0.0597655	0.0001	0.0001	0.112084	0.0001	0.133997	0.20711	0.137797	0.239311	0.372607	0.14254	0.0001	0.246005	0.0001	0.0001	0.248024	0.314264	0.342121
AC017104.2	0.0001	0.0001	0.0001	0.036869	0.0001	0.0001	0.0664205	0.0521161	0.0001	0.0779404	0.0001	0.0001	0.0001	0.0001	0.0001	0.177875	0.0001	0.0001
AC018462.3	0.812157	0.470375	0.286478	0.101494	0.227179	0.274165	0.560211	0.473556	0.0862755	0.599902	0.0230804	0.494496	0.0939402	0.0001	0.000119171	0.37512	0.499598	0.153731
AC018463.4	3.31867	3.11022	2.7655	3.56058	2.89296	2.7383	3.02119	3.06367	2.79078	2.60646	0.776034	1.81856	1.7953	1.22842	4.09809	2.62603	2.01868	2.62308
AC018720.10	0.0553489	0.0001	0.0001	0.405239	0.447815	0.168655	0.201496	0.223727	0.293137	0.300362	0.961132	0.122903	0.318788	0.495334	0.457825	0.78497	0.0001	0.233422
AC018720.10	0.0553489	0.0001	0.0001	0.405239	0.447815	0.168655	0.201496	0.223727	0.293137	0.300362	0.961132	0.122903	0.318788	0.495334	0.457825	0.78497	0.0001	0.233422
AC018735.1	0.110598	0.0001	0.124537	0.110407	0.0001	0.0639907	0.0664205	0.0524294	0.161417	0.117098	0.411971	0.0001	0.117412	0.0001	0.515429	0.118617	0.100257	0.0001
AC018755.1	0.221096	0.393227	0.248973	0.0736381	0.0001	0.255663	0.298542	0.364212	0.378822	0.116861	0.549261	0.491314	0.0783081	0.0001	0.0001	0.237133	0.200414	0.218892
AC018755.16	0.0553489	0.58979	0.248973	0.110407	0.0001	0.0639907	0.0332603	0.13014	0.0689586	0.311462	0.0001	0.36851	0.117412	0.0001	0.0001	0.0593583	0.0001	0.437685
AC018755.2	0.00650048	0.0001	0.0001	0.670467	0.447814	0.0001	0.000121325	0.000100085	0.00235772	0.000100471	0.785877	0.01183	0.000100141	0.0001	0.288333	0.000100229	0.449449	0.0001
AC018766.4	0.249906	0.601841	0.193041	0.202611	0.150964	0.641233	0.209582	0.632946	0.446943	0.947905	0.961132	0.371445	0.08082	0.0001	0.171876	0.696964	0.799722	0.59503
AC018766.5	1.38132	2.1623	1.74221	1.02682	1.32559	1.43049	1.72106	1.76865	1.54932	3.05505	3.07923	2.00903	1.00639	0.742952	0.858982	1.39519	2.88868	2.66983
AC018766.6	0.0001	0.0001	0.0001	0.0001	0.0001	0.0321238	0.0001	0.156148	0.0575416	0.0001	0.274681	0.0001	0.0783081	0.0001	0.0001	0.0593583	0.100257	0.109496
AC018804.6	0.124426	0.000100019	0.000191112	0.0535075	0.30238	0.0001	0.143819	0.221063	0.0001	0.0557205	0.230714	0.0001	0.0001	0.00432231	0.000100061	0.0001	0.189473	0.0001
AC018804.7	1.26166	2.35886	2.39331	1.17903	0.601021	1.47044	1.3329	1.7807	1.72228	1.46125	1.80097	0.870008	1.36503	0.258033	0.858982	1.72149	3.17198	1.81974
AC018816.3	0.0001	0.0001	0.0001	0.0001	0.0001	0.0001	0.0001	0.0521161	0.0460057	0.0001	0.000101531	0.122903	0.0001	0.0001	0.0001	0.0593583	0.200414	0.0001
AC018865.5	2.10971	2.35886	1.8453	1.95419	1.55471	2.21197	1.99928	1.64255	1.62694	2.3933	1.24952	1.44042	1.1775	0.760525	0.829534	1.97577	1.26681	1.87413
AC018867.2	0.0001	0.0001	0.124537	0.0001	0.0001	0.0639907	0.0332603	0.0001	0.0574821	0.0001	0.13739	0.0001	0.117412	0.0001	0.343653	0.0593583	0.100257	0.0001
AC019097.7	4.50664	4.50513	4.09735	2.55888	2.44095	2.5586	2.45684	2.7096	2.96137	3.58415	4.33036	4.81703	2.73739	2.47627	2.25757	3.71499	2.63927	5.0937
AC019129.1	0.221096	0.0001	0.0001	0.036869	0.0001	0.095936	0.0995808	0.0781241	0.0689586	0.0779404	0.0001	0.0001	0.0001	0.0001	0.171876	0.237133	0.0001	0.109496
AC019171.1	0.0148333	0.0001	0.300475	0.404559	0.0001	0.0001	0.0664205	0.059945	0.0831861	0.0001	0.0001	0.122903	0.0001	0.0001	0.0001	0.0001	0.0001	0.218892
AC019178.2	0.110598	0.0001	0.124537	0.110407	0.0001	0.0320453	0.0995808	0.026108	0.0574821	0.0390202	0.0001	0.122903	0.0392041	0.0001	0.171876	0.118617	0.100257	0.109496
AC019221.4	0.0890228	0.28344	0.0001	0.0001	0.447815	0.0695291	0.0001	0.0330048	0.0153658	0.236439	0.0001	0.0001	0.093477	0.0001	0.0001	0.0001	0.0001	0.0001
AC020571.3	0.110598	0.0001	0.186755	0.0736381	0.298577	0.127881	0.331703	0.52026	0.172246	0.0779404	0.274681	0.245707	0.0783081	0.247717	0.343653	0.0593583	1.20199	0.328289
AC020594.5	0.110598	0.0001	0.0001	0.0736381	0.0001	0.0320453	0.132741	0.0521161	0.0345293	0.0779404	0.0001	0.0001	0.0001	0.0001	0.0001	0.0001	0.300572	0.0001
AC020910.2	0.331593	0.58979	0.435629	0.404559	0.0001	0.511225	0.431184	0.364212	0.275534	0.467143	0.549261	0.36851	0.391141	0.247717	0.0001	0.474166	0.100257	0.109496
AC020922.1	0.167806	0.0983816	0.0841871	0.0664467	0.223958	0.0320453	0.0516686	0.116014	0.0923899	0.214702	0.0001	0.0001	0.0443397	0.0001	0.0001	0.0353969	0.0001	0.0001
AC021016.7	1.01184	1.57261	0.248973	0.404559	0.89553	0.670952	0.431184	0.81851	0.386572	0.601604	0.274681	0.245707	0.19562	0.0001	0.171876	0.118617	1.10535	1.21257
AC021218.2	0.0001	0.0001	0.124537	0.0001	0.149338	0.191772	0.0995808	0.104132	0.401775	0.0390202	0.0001	0.245707	0.0001	0.0001	0.0001	0.0593583	0.200414	0.109496
AC021224.1	49.2114	23.5258	27.1293	35.2235	20.2669	26.9007	29.7205	22.9912	25.9831	31.0207	17.3068	21.9458	24.3799	23.1438	10.9843	24.8159	24.7496	22.931
AC021593.1	0.307493	0.000100004	0.258586	0.0043932	0.00397927	0.000111051	0.0102169	0.00033735	0.0115579	0.000466053	0.0136293	1.50287	0.000100808	0.000102982	0.304479	0.000346978	1.1061	0.000163656
AC021860.1	0.28981	0.393227	0.124537	0.300074	0.149338	0.095936	0.563825	0.338204	0.369323	0.447687	0.411971	0.36851	0.240409	0.247717	0.0001	0.42616	0.200414	0.109496
AC022007.5	0.884082	0.393227	0.186755	0.294252	0.298577	0.255663	0.132741	0.39022	0.378409	0.350382	0.274681	0.0001	0.19562	0.0001	0.343653	0.443115	0.200414	0.388514
AC022154.7	0.165847	0.0001	0.124537	0.252548	0.0001	0.0431253	0.132741	0.0824456	0.0230529	0.0789253	0.0001	0.514003	0.0392041	0.0001	0.0001	0.296391	0.400729	0.237182
AC022182.2	2.72894	1.37907	1.82809	3.25001	1.32116	1.4184	0.98082	1.32549	1.04774	1.84493	2.3876	1.88304	1.03327	2.47627	0.346267	0.601966	1.4023	1.31997
AC022210.2	1.07744	0.197505	0.574189	0.691037	0.498177	0.507374	0.626495	0.325013	0.289385	0.80135	0.202066	0.123034	0.442848	0.0001	0.0001	0.478705	0.50857	0.447247
AC022400.2	0.0001	0.0001	0.126172	0.0425458	0.154664	0.0341564	0.0001	0.0001	0.0955525	0.0832531	0.0001	0.128453	0.0001	0.0001	0.0001	0.0001	0.0001	0.111773
AC022431.1	148.466	101.413	92.6509	180.133	84.5602	92.5809	103.383	96.346	90.2156	89.3616	84.6285	70.8521	68.915	105.859	63.6409	72.2916	79.7041	69.1455
AC022431.2	0.110598	0.0001	0.0001	0.0736381	0.0001	0.0001	0.0995808	0.026108	0.0001	0.0779404	0.0001	0.0001	0.0001	0.0001	0.0001	0.0001	0.0001	0.0001
AC024560.3	5.29319	11.6648	6.85753	4.11734	5.00552	6.47622	4.34939	5.92166	5.77887	7.4177	12.4335	9.56688	3.90227	8.44838	7.34983	6.20234	8.3946	6.69465
AC024580.1	0.386842	0.0001	0.248973	0.478098	0.298577	0.159827	0.364863	0.286188	0.264058	0.389302	0.274681	0.614117	0.352037	0.990569	0.687206	0.474166	0.200414	0.437685
AC024592.12	1.32978	0.660284	0.600923	0.434148	0.571342	0.708301	0.753174	0.46886	0.701347	0.872211	0.302486	0.895606	0.419084	0.540941	0.678757	0.457039	0.96981	0.935645
AC024940.1	0.0553489	0.196663	0.0001	0.036869	0.0001	0.0320453	0.0995808	0.026108	0.114864	0.0001	0.13739	0.245707	0.156516	0.247717	0.171876	0.118617	0.591147	0.218892
AC025165.8	0.557045	0.196663	0.560065	0.148226	0.447815	0.197497	0.370295	0.48975	0.29107	0.883789	0.568314	0.384557	0.166385	0.495334	0.0001	0.788874	0.625818	0.0001
AC025171.1	2.26531	1.96573	2.61327	1.21348	0.89553	0.95846	1.72443	1.50857	1.22808	2.76343	3.70694	3.4386	0.664869	1.23819	0.343653	1.36304	0.701201	1.20346
AC025335.1	0.939331	0.196663	0.995594	0.183945	0.746292	0.191772	0.298542	0.624293	0.436204	0.700664	0.13739	0.73692	0.508453	0.0001	0.687206	0.651941	0.300572	0.875269
AC025750.5	0.221517	0.0001	0.124537	0.0001	0.149338	0.0320453	0.132741	0.182156	0.0734214	0.290773	0.0001	0.122903	0.0783081	0.0001	0.0001	0.118617	0.300572	0.0001
AC026150.5	0.386842	1.37604	0.248973	0.294252	0.298577	0.095936	0.364863	0.26018	0.0460057	0.817424	0.549261	0.122903	0.0783081	0.0001	0.171876	0.237133	0.400729	0.0001
AC026150.6	0.0546085	0.0001	0.245638	0.404559	0.147338	0.365794	0.165901	0.288345	0.355876	0.0384986	0.0001	0.242415	0.03868	0.732996	0.515429	0.0001	0.0001	0.21596
AC026150.8	0.110598	0.0001	0.0001	0.0001	0.149338	0.095936	0.0664205	0.026108	0.126341	0.100758	0.13739	0.245707	0.0392041	0.0001	0.0001	0.0001	0.0001	0.0001
AC026202.3	0.0001	0.196663	0.124537	0.036869	0.0001	0.0001	0.165901	0.0521161	0.0460057	0.0390202	0.0001	0.0001	0.0783081	0.0001	0.0001	0.0001	0.100257	0.0001
AC026271.5	42.3645	40.4275	41.0562	46.1848	38.9244	36.148	36.9486	39.2898	38.6598	38.9447	39.6482	34.4486	39.9437	42.4592	45.5927	42.2158	39.9253	37.3276
AC026310.1	0.110598	0.196663	0.186755	0.110407	0.149338	0.0320453	0.0664205	0.286188	0.103388	0.428222	0.823842	0.0001	0.312933	0.247717	0.343653	1.12601	0.400729	0.109496
AC026703.1	0.221096	0.196663	0.189108	0.036869	0.149338	0.0001	0.0001	0.0521161	0.0001	0.24459	1.47066	1.81828	0.0418245	0.0001	0.700212	0.0001	0.0001	0.0001
AC026740.1	0.0553489	0.0001	0.0001	0.0001	0.0001	0.0639907	0.0664205	0.026108	0.0001	0.0779404	0.0001	0.0001	0.0392041	0.0001	0.0001	0.0001	0.100257	0.0001
AC026806.2	1.43657	1.57261	0.871157	0.735481	0.447815	0.47928	0.696466	0.910381	0.734591	0.973105	1.373	2.57897	0.938598	0.495334	0.858982	1.54082	2.90466	2.29742
AC027307.3	0.331593	0.982916	0.560065	0.183945	0.149338	0.223717	0.364863	0.182156	0.367346	0.233621	0.274681	0.0001	0.156516	0.0001	0.343653	0.0593583	0.400729	0.0001
AC027601.1	0.697931	0.212688	0.763298	0.578518	0.845732	1.57888	0.501052	1.28893	1.20644	1.08131	1.91992	1.1288	0.819934	0.828358	0.9511	1.17752	0.76166	1.25564
AC027612.1	3.34641	3.08852	3.95471	4.53602	1.52719	3.24486	2.90086	3.01133	3.20754	4.19771	4.82032	5.62182	3.50822	5.56802	4.14149	4.71134	5.28228	4.69733
AC027612.6	6.85352	5.67597	7.13546	3.19348	3.25825	5.17676	3.4701	3.28441	6.31035	5.35665	3.71129	7.81085	2.96915	1.81332	6.95874	5.59807	4.2159	9.24499
AC027763.2	1.43657	1.96573	1.68	0.952444	1.64172	1.82098	1.45915	1.92469	1.51321	2.10179	1.78487	0.614117	1.48605	1.4858	1.37431	1.36304	1.90309	1.20346
AC034102.1	3.08558	2.85801	2.61716	1.07454	12.0947	4.78588	5.77636	9.11115	3.54662	2.67828	3.85113	4.97011	4.06596	2.87133	2.7041	6.45355	6.70969	5.7886
AC034220.3	0.165847	0.0001	0.0623184	0.0736381	0.0001	0.0001	0.0332603	0.0781241	0.0806209	0.116861	0.13739	0.36851	0.0392041	0.0001	0.0001	0.0593583	0.0001	0.0001
AC037459.4	0.792295	1.96386	0.325623	0.00011511	0.0611619	0.185205	0.377749	0.502423	0.523527	1.12127	0.0833544	1.50438	0.831261	2.40777	0.235211	0.281771	1.00924	0.212002
AC040977.1	7.00432	3.90482	2.68809	11.2461	3.24386	3.98754	7.23936	5.82514	5.96266	4.401	4.36103	2.1673	4.70205	4.59846	3.92658	6.45856	3.12436	5.28421
AC046143.3	1.04983	0.982916	0.435629	1.02963	0.0001	0.543171	0.829107	0.780341	0.734591	1.82935	2.05945	1.84215	2.03351	1.4858	2.06142	2.8445	2.40387	2.07863
AC060834.2	2.18969	0.393227	0.0623184	2.12139	0.97621	0.6107	5.42461	2.07198	0.663581	1.49011	0.496692	0.0001	2.32049	0.495334	0.0001	1.07396	0.200414	0.193908
AC062029.1	1.04983	1.76917	1.24447	2.24301	1.04477	1.0543	1.29335	1.22248	1.74452	1.44015	1.23571	1.96495	1.48605	1.4858	1.88964	1.06675	2.1034	1.53165
AC063976.7	0.110598	0.58979	0.186755	0.110407	0.298577	0.351499	0.165901	0.286188	0.229629	0.194701	0.411971	0.491314	0.0392041	0.0001	0.343653	0.0593583	0.200414	0.109496
AC064850.4	1.21629	0.393227	0.74672	1.76558	0.447815	0.830884	0.696647	0.728325	0.84958	0.857566	1.23571	0.369415	0.821285	0.742952	1.03076	0.829716	0.801358	1.09507
AC064852.4	0.0556741	0.0001	0.0623184	0.147176	0.0001	0.0001	0.0001	0.026108	0.0345293	0.0779404	0.13739	0.0001	0.0001	0.0001	0.0001	0.0001	0.0001	0.0001
AC067945.3	1.10839	0.0001	0.124758	1.10603	0.298577	0.127881	0.298542	0.416851	0.195261	0.389302	0.0001	0.36851	0.195817	0.990569	0.517225	0.177875	0.300572	0.0001
AC068039.4	0.0001	0.58979	0.186755	0.147176	0.0001	0.159827	0.132741	0.312196	0.218152	0.194701	0.823842	0.245707	0.234724	0.0001	0.343653	0.414908	0.601043	0.109496
AC068134.10	0.0937704	0.65573	0.27819	0.0549765	0.0001	0.083644	0.150332	0.124225	0.155328	0.346274	0.602785	0.000100001	0.0781436	0.247717	0.0001	0.172516	0.223784	0.704737
AC068137.13	0.221096	0.0001	0.0001	0.110407	0.0001	0.0320453	0.0332603	0.0521161	0.0345293	0.194701	0.13739	0.0001	0.0001	0.0001	0.171876	0.0001	0.100257	0.0001
AC068282.3	0.552589	1.17948	0.74672	0.404559	0.298577	0.511225	0.331703	0.754333	1.01003	0.700664	1.78487	1.10533	0.234724	0.990569	0.171876	0.474166	0.701201	0.328289
AC068491.2	0.0553489	0.0001	0.0001	0.0001	0.0001	0.0320453	0.0001	0.026108	0.0230529	0.194701	0.13739	0.0001	0.0001	0.0001	0.0001	0.177875	0.0001	0.0001
AC068491.3	0.403135	0.0001	0.0623184	0.110407	0.0001	0.0639907	0.232222	0.338204	0.114864	0.155781	0.0001	0.0001	0.0783081	0.0001	0.0001	0.0593583	0.601043	0.0001
AC068522.4	0.611806	0.0001	0.0001	0.41091	0.0001	0.123855	0.218215	0.279691	0.1317	0.341876	0.817507	0.246039	0.0751001	0.0001	0.0001	0.0001	0.724041	0.109496
AC068533.7	0.0149221	0.000453979	0.187449	0.245377	0.000100003	0.000143808	0.000139925	0.162072	0.257725	0.237361	0.000101996	0.000100095	0.184316	0.000100016	0.51164	0.000100555	0.687593	0.000103411
AC068538.2	0.666925	0.0001	0.0628648	0.474362	0.0001	0.0961073	0.33447	0.11515	0.169699	0.273316	0.416224	0.122903	0.117412	0.0001	0.0001	0.298426	0.403991	0.110767
AC068580.6	0.168223	0.0001	0.254101	0.0378915	0.150021	0.162331	0.137955	0.320847	0.154686	0.714107	0.866849	0.128023	0.118886	0.0001	0.0001	0.249931	0.105188	0.0001
AC068657.2	0.165847	0.0001	0.248973	0.220714	0.0001	0.0320453	0.331703	0.208164	0.080435	0.116861	0.274681	0.0001	0.0392041	0.0001	0.0001	0.237133	0.0001	0.218892
AC068831.10	0.0553489	0.0001	0.0623184	0.0001	0.149338	0.0001	0.0332603	0.0001	0.080435	0.0001	0.0001	0.0001	0.0001	0.0001	0.0001	0.118617	0.0001	0.0001
AC068831.15	0.00234164	0.00060108	0.817322	0.147614	0.524602	0.987542	0.783557	0.0252028	0.0853428	0.740851	1.74926	1.6557	0.315569	0.0665026	0.000113313	0.0455581	0.694788	0.000780306
AC068831.6	0.0556411	0.0001	0.31231	0.0001	0.298577	0.0961326	0.26589	0.235329	0.252755	0.430037	0.823842	0.122903	0.156731	0.0001	0.0001	0.356237	0.601043	0.109496
AC068987.1	0.00144604	0.30967	0.00011116	0.000351224	0.0140081	0.000162791	0.00012769	0.00385612	0.000115105	0.0018091	0.621683	0.0325026	0.000461688	0.860918	0.000100042	0.000324891	0.00136281	0.0001
AC069213.1	0.209128	0.0503146	0.0001	0.19181	0.0001	0.0320453	0.047958	0.0001	0.016565	0.170016	0.0001	0.0001	0.0001	0.0001	0.0001	0.0907075	0.0001	0.0001
AC069277.2	0.0553489	0.0001	0.124537	0.0001	0.0001	0.0001	0.0001	0.026108	0.0230529	0.0001	0.0001	0.122903	0.0001	0.742952	0.0001	0.0593583	0.0001	0.0001
AC069278.4	0.442091	0.786353	0.435629	0.478098	0.298577	0.223717	0.530664	0.312196	0.436204	0.583903	0.686551	0.245707	0.703973	1.4858	0.171876	0.533425	1.4023	0.328289
AC069282.6	0.276345	0.393227	1.18225	0.588405	0.597053	0.47928	0.596985	0.546269	0.723115	0.622823	0.686551	0.73692	0.743077	1.4858	0.687206	0.770458	0.500886	0.984666
AC069368.3	0.000100268	0.0001	0.0001	0.00106379	0.0001	0.0001	0.189525	0.0001	0.049996	0.0001	0.0001	0.0001	0.0001	0.0001	0.000100018	0.202196	0.0001	0.0001
AC069513.4	0.110598	0.0001	0.124537	0.0001	0.0001	0.0320453	0.0995808	0.0521161	0.0460057	0.0779404	0.0001	0.0001	0.0783081	0.0001	0.0001	0.0001	0.0001	0.0001
AC069547.1	0.939331	0.196663	0.37341	0.919326	0.149338	0.415389	0.464344	0.520261	0.378822	0.428222	0.961132	0.36851	0.977702	0.495334	0.687206	0.533425	0.200414	0.328289
AC072062.1	0.49734	0.0001	0.186755	0.36779	0.0001	0.0639907	0.199062	0.13014	0.0919114	0.350382	0.411971	0.0001	0.19562	0.0001	0.171876	0.0001	0.0001	0.0001
AC073046.25	0.607838	0.0001	0.311192	0.36779	0.298577	0.639007	0.232222	0.234172	0.252581	0.311462	0.549261	0.36851	0.430245	0.990569	0.687206	0.533425	0.500886	0.109496
AC073052.1	0.110598	0.0001	0.186755	0.0736381	0.0001	0.095936	0.0664205	0.0001	0.0574821	0.0001	0.0001	0.0001	0.0001	0.0001	0.171876	0.0593583	0.0001	0.0001
AC073063.10	2.10843	1.76917	1.30904	3.51543	0.866494	1.47476	1.37281	1.98725	1.55079	1.24555	1.95859	0.541747	1.29053	2.97151	1.10154	2.16572	2.61665	0.810167
AC073072.5	0.234329	0.58979	0.99537	0.147176	0.746292	0.607051	0.232222	0.791562	1.25969	0.544983	0.686551	1.22813	0.273828	0.247717	0.858982	0.118617	0.0001	0.109496
AC073072.7	1.19793	0.0001	0.0924791	0.0738166	0.000103177	0.0001	0.0001	0.000100006	0.0001	0.0001	0.0544989	0.0001	0.0001	0.0001	0.0001	0.0001	0.397046	0.0001
AC073109.2	0.276345	0.0001	0.124537	0.393384	0.746292	0.0320453	0.165901	0.0781241	0.137817	0.116861	0.13739	0.0001	0.156516	0.247717	0.171876	0.0001	0.200414	0.218892
AC073130.1	7.95594	5.897	5.16422	13.0531	4.32801	3.7377	5.3389	1.50857	2.47901	9.06851	2.47132	4.78943	10.3236	3.46674	4.29451	9.06662	2.90466	3.82897
AC073130.3	0.552589	0.393227	1.05781	1.72121	1.19401	2.45989	0.955783	0.546269	0.975596	2.41315	2.05945	3.6842	3.67588	2.97151	2.78803	2.66672	0.901515	3.28199
AC073150.6	0.0001	0.0001	0.0623184	0.110407	0.0001	0.0320453	0.0001	0.0781241	0.0230645	0.0001	0.0001	0.0001	0.0001	0.0001	0.0001	0.0001	0.300572	0.109496
AC073254.1	0.290011	0.196663	0.190389	0.222764	0.0001	0.360597	0.165901	0.343527	0.138901	0.195641	0.274681	0.497975	0.19562	0.0001	0.171876	0.239266	0.606417	0.218892
AC073264.10	0.110598	0.0001	0.0001	0.0001	0.0001	0.095936	0.0664205	0.13014	0.0001	0.0390202	0.13739	0.0001	0.0392041	0.0001	0.0001	0.0593583	0.0001	0.0001
AC073283.4	0.397379	0.393227	0.338407	0.0001	0.0001	0.164698	0.101378	0.0001	0.13443	0.443045	0.478778	0.311738	0.33805	0.55058	0.0001	0.331866	0.0001	0.125023
AC073310.4	0.165847	0.196663	0.069604	0.0001	0.0001	0.0399001	0.0001	0.0734606	0.0138211	0.0001	0.0001	0.000100077	0.0987636	0.0001	0.171876	0.0873929	0.300572	0.0001
AC073333.8	0.0001	0.0001	0.0001	0.0001	0.0001	0.0321468	0.166317	0.104401	0.0345684	0.0001	0.276679	0.0001	0.0392041	0.0001	0.0001	0.119069	0.201286	0.110115
AC073343.1	0.165847	0.0001	0.124537	0.110407	0.0001	0.095936	0.0995808	0.0001	0.0345293	0.0390202	0.0001	0.122903	0.234724	0.0001	0.0001	0.0001	0.0001	0.0001
AC073343.13	0.110598	0.0001	0.0623184	0.0736381	0.0001	0.0320453	0.0664205	0.104132	0.0689586	0.0390202	0.13739	0.0001	0.0001	0.0001	0.0001	0.0001	0.100257	0.0001
AC073410.1	0.0001	0.196663	0.248973	0.036869	0.0001	0.0639907	0.0332603	0.104132	0.0001	0.0001	0.13739	0.0001	0.0392041	0.495334	0.171876	0.0593583	0.0001	0.0001
AC073465.3	0.607838	0.196663	0.124537	0.294252	0.0001	0.127881	0.0995808	0.156148	0.16077	0.272541	0.411971	0.36851	0.0001	0.247717	0.515429	0.0001	0.0001	0.0001
AC073621.2	0.0001	0.0001	0.0623184	0.036869	0.149338	0.0001	0.0664205	0.104132	0.080435	0.155781	0.0001	0.0001	0.0392041	0.247717	0.0001	0.0001	0.100257	0.109496
AC073869.1	3.31673	1.96658	1.58227	4.39565	1.5971	1.99743	1.92013	2.51447	1.5886	2.35121	2.05994	1.37071	2.58685	4.18542	1.89436	2.4483	3.61225	3.12517
AC073869.2	0.152963	0.0001	0.0001	0.0942764	0.23635	0.237087	0.186912	0.269784	0.194219	0.416365	0.0001	0.0001	0.152977	0.0001	0.0001	0.325605	0.150081	0.227213
AC073869.20	1.43903	0.196663	0.414928	0.810981	0.300193	0.929014	0.870075	0.754625	0.63475	1.07291	0.391493	0.123404	1.07442	0.495334	1.37431	1.10387	0.639963	1.58113
AC074019.2	0.165847	0.0001	0.0001	0.110407	0.0001	0.0639907	0.0664205	0.0001	0.0230529	0.155781	0.0001	0.0001	0.0392041	0.495334	0.0001	0.0001	0.100257	0.0001
AC074117.10	5.6643	5.30731	6.0975	3.30328	4.62649	4.06882	4.21145	4.47348	5.35755	4.64679	4.39339	4.54383	5.19866	6.93338	3.77918	5.09631	6.51032	6.67327
AC074138.3	0.331593	0.393227	0.0623184	0.220714	0.149338	0.0320453	0.132741	0.234172	0.137817	0.155781	0.411971	0.614117	0.391141	0.0001	0.343653	0.0593583	0.0001	0.656477
AC074183.4	1.11224	1.39576	0.311192	0.447465	0.0001	0.543171	0.232222	0.26875	0.310616	0.239844	0.0001	0.491314	0.0392041	0.0001	0.343653	0.118617	0.500886	0.0001
AC074212.5	2.19854	0.993743	1.58034	2.61452	2.56331	2.82616	0.852634	0.982512	0.704249	2.3938	2.38887	0.962247	0.53966	2.83336	1.57308	0.523894	0.708042	2.17335
AC074212.6	0.171978	0.0001	0.0630154	0.110407	0.0001	0.127881	0.101048	0.120937	0.103684	0.47245	0.13739	0.491314	0.0797104	0.0001	0.175783	0.118617	0.100257	0.109496
AC074286.1	1.54966	1.96573	1.80443	0.741615	1.19401	1.12583	1.61378	1.6117	2.0129	3.1395	3.1326	2.76959	1.98757	1.0134	1.71786	1.77801	2.03687	1.75042
AC074289.1	0.276345	1.17948	0.186755	0.36779	0.0001	0.0320453	0.0664205	0.286188	0.172246	0.817424	0.549261	0.614117	0.469349	0.495334	0.343653	0.0593583	0.200414	0.0001
AC074389.9	0.331593	0.0001	0.0001	0.036869	0.0001	0.095936	0.0001	0.0001	0.0574821	0.0001	0.0001	0.0001	0.0392041	0.0001	0.0001	0.0001	0.0001	0.0001
AC078883.3	0.276345	0.393227	0.186755	0.110407	0.149338	0.159827	0.199062	0.0781241	0.0689586	0.0779404	0.13739	0.36851	0.0001	0.247717	0.0001	0.0593583	0.200414	0.0001
AC078899.1	10.8066	8.92571	11.8318	8.90202	10.1467	10.7179	12.5935	12.3078	11.013	10.2975	9.411	9.72448	10.98	8.55276	15.8047	12.071	11.8364	12.6261
AC078899.1	10.8066	8.92571	11.8318	8.90202	10.1467	10.7179	12.5935	12.3078	11.013	10.2975	9.411	9.72448	10.98	8.55276	15.8047	12.071	11.8364	12.6261
AC078941.1	0.0553489	0.0001	0.0001	0.0001	0.0001	0.0639907	0.0332603	0.13014	0.126341	0.0390202	0.0001	0.122903	0.0001	0.0001	0.0001	0.0001	0.200414	0.109496
AC079135.1	0.0001	0.0001	0.248502	0.0001	0.0001	0.0320453	0.0001	0.0330131	0.012329	0.0001	0.336971	0.0001	0.0001	0.0001	0.0001	0.0001	0.100257	0.161296
AC079210.1	0.0001	0.196663	0.248973	0.0736381	0.447815	0.095936	0.0664205	0.13014	0.137817	0.155781	0.0001	0.0001	0.117412	0.0001	0.858982	0.0001	0.200414	0.0001
AC079250.1	3.97815	1.10006	1.58284	2.52386	1.92561	1.88889	2.29306	2.41758	1.67797	1.99418	2.13515	1.09336	1.59686	3.65359	1.77109	1.85534	4.21405	1.45356
AC079305.10	0.110598	0.196663	0.0001	0.922923	0.0001	0.325165	0.203508	0.187524	0.0701932	0.124137	0.0001	0.491314	0.157276	0.247717	0.0001	0.0607905	0.102907	0.218892
AC079354.2	0.110598	0.0001	0.0001	0.323668	0.0001	0.0320453	0.132741	0.0781241	0.0525637	0.0779404	0.13739	0.122903	0.0001	0.0001	0.515429	0.0593583	0.100257	0.109496
AC079354.6	0.0001	0.0001	0.0623184	0.441329	0.0001	0.0639907	0.132741	0.0521161	0.0230529	0.0001	0.0001	0.0001	0.0001	0.0001	0.0001	0.0001	0.0001	0.0001
AC079776.6	0.376094	0.0001	0.00478272	1.20641	0.000100028	0.2091	0.236059	0.316618	0.260302	0.292301	0.0001	0.524628	0.0001	1.22061	1.27814	0.209764	0.587809	0.52346
AC079780.3	0.221096	0.196663	0.0001	0.257483	0.0001	0.191772	0.0332603	0.0781241	0.0230529	0.0390202	0.549261	0.122903	0.0001	0.0001	0.171876	0.0001	0.200414	0.0001
AC079807.2	0.165847	0.196663	0.0001	0.036869	0.0001	0.0639907	0.0664205	0.13014	0.0001	0.350382	0.13739	0.245707	0.0783081	0.0001	0.0001	0.0593583	0.0001	0.0001
AC079922.2	0.166921	0.787652	0.124731	0.162701	0.0001	0.159993	0.255871	0.208548	0.204792	0.234431	0.0001	0.122903	0.197563	0.248537	0.172279	0.194531	0.100841	0.109792
AC079922.3	0.442091	1.17948	0.995594	0.294252	0.149338	0.415389	0.199062	0.416228	0.596874	1.12879	0.274681	1.59654	0.469349	0.0001	1.20253	0.651941	1.00167	0.547081
AC080125.1	0.111238	0.0001	0.0623184	0.0736381	0.149338	0.0639907	0.0335816	0.0523042	0.0231832	0.118878	0.0001	0.0001	0.0001	0.0001	0.0001	0.0001	0.0001	0.0001
AC083799.1	3.97802	3.34168	2.48883	3.86085	3.28334	2.71545	4.44358	3.32913	2.90364	3.8532	5.21713	2.82458	3.71499	3.96198	2.9203	3.31856	2.20356	3.82897
AC083843.1	1.27082	1.76917	1.12003	0.735481	0.597053	0.766788	1.12755	1.40453	1.14774	1.47907	2.47132	1.59654	0.821285	0.247717	0.171876	1.12601	1.00167	0.547081
AC083862.6	0.0001	0.0001	0.0001	0.0740122	0.0001	0.0001	0.0995808	0.0521845	0.0689978	0.116861	0.0001	0.122903	0.0783081	0.0001	0.515429	0.0597096	0.0001	0.0001
AC083873.4	17.1517	14.8093	16.0383	13.0564	13.4834	10.8808	10.1768	9.75617	9.30724	12.6954	12.1815	14.0657	10.18	12.3857	10.1291	9.95666	10.8755	10.0741
AC083884.8	0.345705	0.196663	0.198097	0.0772701	0.0001	0.0683757	0.0998157	0.143626	0.176569	0.429858	0.398558	0.491847	0.0804642	0.0001	0.345438	0.0992327	0.215242	0.124434
AC083899.3	1.17982	1.51892	1.24872	0.0561958	0.549628	0.721527	0.682011	1.1565	0.832267	1.30546	2.09644	0.628872	0.5563	1.07055	0.943242	0.747372	0.912306	1.0364
AC083949.1	0.0001	0.0001	0.0001	0.0001	0.0001	0.170741	0.0001	0.0276646	0.0354951	0.0001	0.0001	0.0001	0.0001	0.0001	0.0001	0.249354	0.0001	0.0001
AC084018.1	10.8702	15.501	10.2756	2.56674	1.81567	3.77641	3.92019	3.18901	4.34873	21.0578	21.9952	19.6306	5.75119	8.60759	8.19136	10.6034	9.10201	9.48713
AC084125.4	0.165847	0.786353	0.0623184	0.036869	0.0001	0.127881	0.0995808	0.0001	0.149294	0.0779404	0.0001	0.122903	0.200899	0.0001	0.0001	0.0001	0.100257	0.0001
AC084219.3	0.330178	0.35077	0.16736	0.415206	1.08784	0.363418	0.0797822	0.554939	0.230869	1.17637	0.656997	1.04924	0.405388	0.902427	0.929376	0.274203	0.637758	0.0001
AC084219.4	5.03287	5.80206	6.7875	2.61151	0.0536753	4.06192	3.52244	3.28155	3.43739	3.23896	6.24239	1.11546	3.94419	6.93874	5.15455	3.30772	3.07354	3.06245
AC087163.2	0.0001	0.0001	0.124537	0.0001	0.149338	0.0001	0.0001	0.0001	0.0460057	0.0001	0.0001	0.0001	0.0783081	0.495334	0.0001	0.0001	0.0001	0.0001
AC087269.1	0.000425612	0.0001	0.0623184	0.0001	0.447815	0.0001	0.00662513	0.0754997	0.0001	0.000227424	0.000100001	0.0001	0.0160993	0.247717	0.0001	0.0593583	0.100257	0.0001
AC087294.2	0.386842	0.0001	0.0623184	0.0736381	0.298577	0.0639907	0.364863	0.156148	0.103388	0.0001	0.686551	0.491314	0.0783081	0.0001	0.0001	0.592683	0.400729	0.218892
AC087499.5	0.221096	0.0001	0.186755	0.36779	0.0001	0.159827	0.0664205	0.15742	0.218152	0.194701	0.411971	0.491314	0.0783081	0.247717	0.171876	0.110118	0.300572	0.109496
AC087650.1	0.110598	0.196663	0.0001	0.0001	0.0001	0.159827	0.0995808	0.026108	0.0230529	0.0001	0.0001	0.0001	0.0392041	0.0001	0.171876	0.0594629	0.100257	0.109496
AC090587.2	0.341068	0.196663	0.124537	0.036869	0.0001	0.223717	0.265382	0.39022	0.370372	0.428222	0.13739	0.36851	0.273828	0.495334	0.171876	0.474166	0.200414	0.328289
AC090587.4	0.110598	0.0001	0.0001	0.0001	0.0001	0.0639907	0.0332603	0.0781241	0.0345293	0.0390202	0.0001	0.0001	0.0392041	0.0001	0.0001	0.0001	0.100257	0.109496
AC090602.2	0.221177	0.0001	0.124537	0.036869	0.0001	0.191772	0.0995808	0.182243	0.114895	0.0779404	0.274681	0.0001	0.0392041	0.0001	0.0001	0.0001	0.301185	0.218892
AC090616.2	0.0001	0.0001	0.0001	0.0001	0.0001	0.095936	0.0670431	0.0266793	0.0234174	0.0805547	0.0001	0.0001	0.0001	0.0001	0.180657	0.0001	0.0001	0.0001
AC090804.1	0.169047	0.0001	0.248973	0.331132	0.298577	0.365141	0.184829	0.744665	0.318604	0.395313	0.64316	0.419158	0.33991	0.247717	0.0001	0.237294	0.52085	0.437685
AC090945.1	0.193671	0.0001	0.0623184	0.0736381	0.0001	0.0320453	0.0664205	0.0781241	0.0569468	0.0001	0.0001	0.0001	0.0001	0.0001	0.0001	0.237133	0.0001	0.0001
AC091171.1	0.269736	0.00021148	1.76697	0.0611653	0.71065	1.11583	0.171836	0.0975711	0.627148	0.144249	0.0183735	0.129462	0.216193	0.0600156	1.6402	0.235907	0.952527	0.179214
AC091492.2	0.607838	0.200291	0.124537	0.404559	0.149338	0.28939	0.333805	0.528212	0.173788	0.428222	0.411971	0.36851	0.157122	0.256809	0.515429	0.296391	0.506993	0.231665
AC091633.2	0.165847	0.196663	0.186755	0.220714	0.149338	0.0989341	0.199492	0.182156	0.114864	0.0779404	0.274681	0.122903	0.0392041	0.247717	0.343653	0.0001	0.400729	0.218892
AC091633.3	0.0553489	0.0001	0.0001	0.0001	0.0001	0.095936	0.0001	0.0781241	0.0230529	0.0001	0.0001	0.245707	0.0001	0.0001	0.0001	0.0001	0.0001	0.0001
AC091729.9	2.65205	1.76917	2.11552	1.10317	1.79096	1.43764	0.994908	1.56058	1.90519	2.41315	1.23571	2.45617	0.703973	0.990569	2.40497	0.888974	0.601043	1.53165
AC092106.1	0.0788034	0.196663	0.124537	0.147176	0.0001	0.159827	0.0995808	0.0781241	0.0574821	0.0390202	0.0001	0.0001	0.0001	0.0001	0.0001	0.0001	0.0476588	0.0001
AC092106.2	0.221096	0.0001	0.124537	0.000110915	0.0001	0.0669166	0.0001	0.0853185	0.0689586	0.155781	0.411971	0.122903	0.0392041	0.0001	0.171876	0.0868003	0.200414	0.109496
AC092155.1	0.303851	0.392907	0.0001	0.0001	0.0001	0.0733356	0.197175	0.100507	0.162739	0.0958162	0.0001	0.0001	0.0001	0.0001	0.0001	0.0001	0.462045	0.0001
AC092171.2	0.0001	0.196663	0.0001	0.036869	0.0001	0.191772	0.132741	0.104132	0.0574821	0.194701	0.13739	0.0001	0.234724	0.0001	0.0001	0.0593583	0.300572	0.0001
AC092171.4	10.1659	13.1698	9.64395	5.73607	11.9392	8.08227	6.96376	9.0769	9.26158	4.16456	4.80526	5.03504	3.8323	3.96198	3.77918	6.1037	8.41331	6.23568
AC092295.7	1.27082	0.196663	0.560065	0.551636	0.447815	0.48902	0.762786	0.572277	0.677209	1.47907	1.09842	0.614117	0.690406	0.247717	0.515429	1.12601	0.400729	1.64104
AC092299.7	0.180333	0.714369	0.0001	0.0435084	0.0001	0.0575629	0.128613	0.0518709	0.113355	0.410374	0.248412	0.0491386	0.16778	0.0001	0.343653	0.154792	0.911537	0.0633173
AC092299.8	0.0983443	1.467	0.56042	0.0001	1.18123	0.490318	0.410576	1.02614	0.349282	0.831105	0.893417	0.645508	0.519985	0.0001	0.0001	0.449826	1.06804	0.252401
AC092301.3	0.0001	0.0001	0.124537	0.183945	0.0001	0.0320453	0.0995808	0.182156	0.137817	0.155781	0.13739	0.122903	0.0392041	0.247717	0.0001	0.296391	0.100257	0.218892
AC092570.4	0.0001	0.0001	0.0001	0.036869	0.0001	0.0639907	0.0001	0.0001	0.0230529	0.0390202	0.13739	0.0001	0.0392041	0.0001	0.0001	0.0001	0.300572	0.0001
AC092597.3	0.181107	0.0001	0.12883	0.0409826	0.330787	0.244771	0.396313	0.207639	0.244171	0.12814	0.0001	0.150132	0.170249	0.300449	0.0001	0.189413	0.307971	0.437685
AC092610.12	2.1726	0.58979	0.437024	1.16953	0.308961	0.916951	0.395238	0.5496	0.575167	0.785574	0.282964	1.50473	0.821285	1.23819	0.687206	0.948233	0.704824	0.659221
AC092614.2	0.110598	0.196663	0.124537	0.036869	0.0001	0.095936	0.199062	0.234172	0.344393	0.0779404	0.13739	0.491314	0.19562	0.0001	0.171876	0.0001	0.100257	0.328289
AC092641.2	0.165847	0.196663	0.186755	0.0839597	0.298577	0.0001	0.0664205	0.156148	0.080435	0.155781	0.411971	0.0001	0.0001	0.0001	0.0001	0.0001	0.0001	0.109496
AC092642.1	0.0553489	0.0001	0.0001	0.036869	0.0001	0.127881	0.0332603	0.026108	0.0001	0.0390202	0.0001	0.0001	0.0783081	0.0001	0.171876	0.118617	0.0001	0.0001
AC092653.5	1.21558	0.196663	0.186755	0.0001	0.0001	0.0001	0.132741	0.0001	0.0345293	1.20663	1.373	0.122903	0.0392041	0.0001	0.0001	0.237133	0.0001	0.0001
AC092664.1	0.110598	0.0001	0.0001	0.110407	0.0001	0.127881	0.0332603	0.0001	0.0460057	0.233621	0.0001	0.36851	0.312933	0.0001	0.171876	0.118617	0.0001	0.0001
AC092798.2	0.0553489	0.196663	0.0623184	0.0001	0.0001	0.0001	0.0001	0.0001	0.0115764	0.116861	0.13739	0.0001	0.0001	0.247717	0.0001	0.0001	0.0001	0.109496
AC092811.1	0.221096	0.393227	0.435629	0.0736381	0.149338	0.447335	0.265382	0.182156	0.264058	0.194701	0.961132	0.0001	0.19562	0.0001	0.343653	0.35565	0.701201	0.109496
AC092835.2	2.5968	2.55542	2.17774	1.21348	2.08944	1.21402	1.35967	1.48256	1.51499	2.14071	3.43236	3.5614	1.8771	2.22866	1.88964	2.25192	2.00324	1.75044
AC092933.3	0.386842	0.0001	0.0001	0.0736381	0.0001	0.0639907	0.132741	0.026108	0.0001	0.0869473	0.0001	0.0001	0.0392041	0.0001	0.0001	0.0593583	0.200414	0.0001
AC093106.5	0.828834	0.393227	0.216241	0.398246	0.180183	0.139995	0.147078	0.206512	0.150561	0.130346	0.274681	0.122903	0.0783081	0.247717	0.0001	0.0673805	0.118367	0.218892
AC093106.7	20.5541	13.162	11.539	11.5791	11.2677	12.5747	14.3219	14.4339	11.4737	14.9865	12.8781	10.6399	11.4841	8.84949	10.5357	12.5117	13.8881	12.2452
AC093110.3	0.0881744	0.0001	0.227247	0.112472	0.0001	0.185932	0.189805	0.320142	0.115554	0.119062	0.574246	0.162113	0.0001	0.0001	0.920981	0.0901252	0.589663	0.0001
AC093157.1	0.385257	0.664567	0.67706	0.193991	0.0001	0.257174	0.194803	0.330545	0.31199	0.304796	0.320745	0.142845	0.314035	0.0001	0.577728	0.0693267	0.224179	0.726955
AC093162.5	0.0553489	0.0001	0.0001	0.0001	0.0001	0.0001	0.0001	0.182156	0.0460057	0.0001	0.274681	0.0001	0.0392041	0.0001	0.0001	0.0593583	0.0001	0.0001
AC093323.3	9.17143	9.43514	7.4663	3.97115	4.32801	4.40856	4.37726	4.31743	4.67102	9.69123	8.3748	6.26307	6.29585	4.70483	6.5276	4.56299	4.79624	6.12629
AC093375.1	0.0001	0.0001	0.0623184	0.0736381	0.0001	0.0001	0.0001	0.0521161	0.0115764	0.0779404	0.13739	0.122903	0.0001	0.0001	0.0001	0.0593583	0.0001	0.0001
AC093391.2	0.165847	0.0001	0.0001	0.0001	0.0001	0.0320453	0.0001	0.13014	0.0919114	0.116861	0.0001	0.122903	0.0392041	0.0001	0.171876	0.118617	0.0001	0.0001
AC093415.2	1.04983	2.27983	0.933376	0.404559	0.000100198	0.319553	0.00787966	0.213637	0.264058	1.01203	0.549261	0.836854	0.156517	0.000100101	0.0001	0.35565	0.500886	0.547081
AC093495.4	0.0001	0.254324	0.0766754	0.329943	0.0001	0.03226	0.0800754	0.0523359	0.0803619	0.130718	0.466656	0.535628	0.0001	0.0001	0.0001	0.0593583	0.109948	0.0001
AC093616.4	8.93958	4.23882	2.47529	3.03571	1.92847	0.662304	3.41603	1.08303	1.16485	3.9887	3.86614	1.20446	2.39458	1.37836	1.10021	2.90466	0.899135	0.698068
AC093620.5	0.0001	0.196663	0.0623184	0.036869	0.0001	0.0320453	0.0664205	0.0521161	0.103388	0.155781	0.274681	0.0001	0.234724	0.0001	0.171876	0.7112	0.100257	0.109496
AC093627.10	0.165847	0.393227	0.0623184	0.110407	0.0001	0.287608	0.165901	0.0781241	0.0919114	0.272541	0.411971	0.491314	0.0783081	0.247717	0.343653	0.0001	0.200414	0.109496
AC093627.9	0.442091	0.393227	0.186755	0.036869	0.149338	0.191772	0.0995808	0.0781241	0.103388	0.350382	0.274681	0.36851	0.273828	0.247717	0.0001	0.237133	0.400729	0.218892
AC093642.3	0.110598	0.0001	0.124537	0.0001	0.0001	0.095936	0.0001	0.104132	0.0460057	0.116861	0.13739	0.0001	0.156516	0.0001	0.0001	0.0001	0.0001	0.0001
AC093642.5	1.03093	1.17948	1.36881	1.97852	1.79096	0.766755	1.26019	1.45144	0.773949	2.07727	1.64758	0.491314	0.784376	1.98104	1.71786	0.989798	1.17681	0.656477
AC093668.2	0.172259	0.0001	0.0623184	0.0001	0.0001	0.159827	0.0339132	0.105407	0.137817	0.155781	0.0001	0.245707	0.0001	0.247717	0.171876	0.177875	0.0001	0.0001
AC093673.5	2.15481	2.35886	1.68	1.25025	0.447815	1.88488	2.81872	2.02873	1.72156	2.45207	1.373	2.33336	3.12843	1.98104	2.23319	4.14818	2.8045	3.28199
AC093677.1	0.341483	0.0001	0.0623184	0.0001	0.0001	0.191772	0.0351126	0.105293	0.150136	0.389302	0.0001	0.0001	0.312933	0.0001	0.171876	0.414908	0.701201	0.227042
AC093698.2	0.872455	0.0001	0.395745	0.599544	0.0001	0.0610731	0.0001	0.557555	0.263675	0.389161	0.275613	0.000100084	0.222834	0.0001	0.288404	0.0001	0.133675	0.0001
AC093724.2	5.92139	7.20854	6.04954	2.77193	3.45314	4.12088	6.53884	5.42941	6.26288	7.05136	6.04087	7.98232	7.29667	8.09059	9.99862	11.8873	10.4433	12.065
AC093818.1	0.784844	0.431093	1.10652	0.478098	0.89553	0.485927	0.54046	0.364212	0.656885	1.62683	2.38629	1.77258	1.10713	0.495334	0.687206	0.602538	0.648387	1.50463
AC093838.4	11.3316	12.8212	12.0771	9.25358	8.43125	11.5222	10.9214	10.6888	11.1523	18.6531	17.8451	20.3498	12.8806	12.1696	13.9238	16.6957	12.934	14.6889
AC093850.2	1.32607	0.0001	0.74672	0.220714	0.0001	0.095936	0.0332603	0.0781241	0.103388	0.350382	0.0001	0.122903	0.312933	0.0001	0.0001	0.118617	0.100257	0.109496
AC096574.4	0.0572563	0.0001	0.0001	0.0001	0.0001	0.0639907	0.066452	0.026108	0.0579945	0.0796619	0.0001	0.0001	0.0001	0.0001	0.0001	0.0593583	0.103631	0.0001
AC096574.5	0.0553489	0.0001	0.0001	0.036869	0.0001	0.0001	0.0664205	0.026108	0.0460057	0.0390202	0.0001	0.0001	0.0001	0.0001	0.0001	0.177875	0.200414	0.0001
AC096664.1	0.276345	0.0001	0.0623184	0.110407	0.0001	0.0639907	0.0001	0.104132	0.080435	0.0390202	0.13739	0.122903	0.0783081	0.0001	0.171876	0.0001	0.100257	0.0001
AC096677.1	3.46394	3.34168	2.81857	1.94051	1.42521	1.41005	3.55274	3.3755	3.05866	4.40646	2.22869	3.27686	4.74162	1.16119	3.84387	5.38874	5.76467	4.76938
AC096772.6	1.54707	1.76917	2.05331	0.882557	1.9402	1.3418	1.26019	0.832357	0.837879	1.82935	2.19674	2.45617	1.32964	1.73342	1.71786	1.30378	1.4023	0.875269
AC097359.1	0.0615321	0.0748813	0.089657	0.0601106	0.101606	0.0708145	0.000144207	0.000441232	0.00382351	0.000173524	0.210711	0.0652799	0.0137389	0.560666	0.210673	0.00715594	0.302726	0.0539711
AC097381.1	0.110855	0.0001	0.0001	0.294859	0.0001	0.0322134	0.0333066	0.0001	0.0116241	0.157142	0.0001	0.0001	0.0396001	0.0001	0.0001	0.119627	0.0001	0.0001
AC097523.1	0.562015	0.197881	0.563296	2.90602	0.749333	0.0969535	0.335161	0.262455	0.230864	0.314128	0.552682	0.0001	0.196724	1.25694	0.347181	0.358416	0.709143	0.11002
AC097523.3	0.0553489	0.393227	0.0001	0.036869	0.0001	0.0639907	0.0332603	0.0001	0.0689586	0.0001	0.0001	0.0001	0.0001	0.0001	0.0001	0.0593583	0.100257	0.0001
AC097533.1	0.598225	0.58979	0.435629	0.111006	0.77555	0.433345	0.333322	0.552084	0.392789	0.350382	0.274681	0.245707	0.423881	0.495334	0.353512	0.118617	0.304905	0.765873
AC097658.1	0.174332	0.0001	0.456398	0.342235	0.0001	0.457799	0.40969	0.18412	0.22514	0.380061	0.13739	0.12616	0.280411	0.247717	0.171876	0.427822	0.0001	0.456686
AC097662.2	0.331593	0.196663	0.0001	0.110407	0.298577	0.0639907	0.232222	0.468244	0.218152	0.311462	0.961132	0.122903	0.156516	0.247717	0.171876	0.177875	0.300572	0.0001
AC097711.1	0.663087	0.196663	0.124537	0.331021	0.0001	0.15694	0.26686	0.265661	0.139896	0.155781	0.0001	0.0001	0.356112	0.495334	0.171876	0.14984	0.200414	0.0001
AC097721.2	0.110598	0.196663	0.0001	0.0001	0.0001	0.0639907	0.0001	0.026108	0.0345293	0.0390202	0.13739	0.0001	0.0001	0.0001	0.0001	0.0593583	0.200414	0.109496
AC098614.2	35.7985	20.5959	25.7274	51.4769	19.1902	23.1551	29.0592	23.1185	23.9762	29.4793	25.8567	27.4009	31.6793	35.3487	36.6072	26.8423	20.0675	33.5328
AC098617.1	0.165847	0.0001	0.0623184	0.0001	0.149338	0.255663	0.338724	0.286188	0.436871	0.0390202	0.0001	0.0001	0.0783081	0.0001	0.0001	0.0593583	0.100257	0.0001
AC098789.1	0.0001	0.0001	0.0001	0.073616	0.0001	0.0959072	0.0332503	0.0261002	0.0574649	0.077917	0.0001	0.0001	0.0391923	0.0001	0.171825	0.0001	0.0001	0.0001
AC098789.1	0.0001	0.0001	0.0001	0.073616	0.0001	0.0959072	0.0332503	0.0261002	0.0574649	0.077917	0.0001	0.0001	0.0391923	0.0001	0.171825	0.0001	0.0001	0.0001
AC098789.1	0.0001	0.0001	0.0001	0.073616	0.0001	0.0959072	0.0332503	0.0261002	0.0574649	0.077917	0.0001	0.0001	0.0391923	0.0001	0.171825	0.0001	0.0001	0.0001
AC098789.1	0.0001	0.0001	0.0001	0.073616	0.0001	0.0959072	0.0332503	0.0261002	0.0574649	0.077917	0.0001	0.0001	0.0391923	0.0001	0.171825	0.0001	0.0001	0.0001
AC098789.1	0.0001	0.0001	0.0001	0.073616	0.0001	0.0959072	0.0332503	0.0261002	0.0574649	0.077917	0.0001	0.0001	0.0391923	0.0001	0.171825	0.0001	0.0001	0.0001
AC098824.6	0.355893	0.409028	0.317188	0.895845	0.0001	0.354454	0.331703	0.31591	0.212084	0.272541	0.143545	0.0001	0.238683	0.548296	0.171876	0.177875	0.104852	0.656477
AC098828.3	0.828834	0.0001	0.497847	0.257483	0.149338	0.415389	0.364863	0.858365	0.218152	0.389302	1.09842	0.245707	0.156516	0.0001	0.515429	0.237133	0.500886	0.109496
AC098831.4	0.165847	0.41284	0.124537	0.036869	0.298577	0.095936	0.0001	0.364212	0.0230529	0.116861	0.13739	0.0001	0.0001	0.0001	0.171876	0.0593583	0.601043	0.0001
AC099048.1	0.110598	0.0001	0.0001	0.0001	0.0001	0.0320453	0.132741	0.026108	0.0574821	0.155781	0.0001	0.122903	0.117412	0.0001	0.0001	0.0593583	0.100257	0.0001
AC099522.1	0.0001	0.0994426	0.0387695	0.018683	0.0755247	0.0001	0.0503774	0.0132444	0.0175005	0.0726681	0.0001	0.0621645	0.170225	0.125245	0.260546	0.294604	0.124598	0.0001
AC099522.2	3.17088	5.30731	2.8661	3.91154	4.50288	2.95839	2.93326	3.75545	2.96834	3.50052	5.53124	2.66358	3.1159	4.20959	3.559	2.99421	3.97475	4.66398
AC099535.4	0.165847	0.196663	0.0623184	0.36779	0.149338	0.0001	0.0664205	0.0781241	0.080435	0.0001	0.13739	0.245707	0.0001	0.0001	0.171876	0.118617	0.500886	0.0001
AC099668.5	0.0001	0.0001	0.000100503	0.0001	0.0153083	0.0320453	0.0001	0.0001	0.066928	0.0543692	0.0001	0.245707	0.0001	0.495334	0.0001	0.0001	0.000100364	0.0001
AC099850.1	0.297326	0.58979	0.274577	0.135997	0.485089	0.355835	0.103494	0.198693	0.30883	0.327678	0.418962	0.139406	0.134715	0.0001	0.174685	0.126615	0.0001	0.221953
AC100830.3	0.0553489	0.0001	0.0001	0.036869	0.0001	0.0639907	0.0332603	0.026108	0.0460057	0.0001	0.0001	0.0001	0.0392041	0.495334	0.0001	0.0001	0.0001	0.0001
AC104134.2	0.287145	0.0001	0.583852	0.138788	1.00521	0.869047	0.511395	0.227289	0.20402	0.0659092	0.249468	0.184794	0.596858	0.0001	0.0001	0.203866	0.837977	0.954136
AC104135.3	0.49734	3.93137	0.0001	0.0736381	2.53715	0.0001	0.265382	4.34344	0.0001	0.544983	4.11881	0.0001	0.312933	1.4858	0.0001	0.35565	2.8045	0.0001
AC104297.1	5.23562	3.8442	4.2195	5.70098	4.06819	5.07153	5.74612	5.12949	5.66406	3.5449	3.66538	4.25146	4.47213	4.02058	5.31169	3.41353	4.45555	3.58263
AC104306.1	0.0001	0.58979	0.0001	0.0526568	0.0001	0.0408927	0.22433	0.0001	0.0145506	0.0001	0.0001	0.0001	0.0001	0.0001	0.0001	0.0001	0.258495	0.0001
AC104651.2	1.13115	0.196663	0.37341	1.13994	1.19401	0.70334	0.696985	0.806349	0.637552	0.577633	1.09842	1.59654	0.500153	0.742952	0.343653	0.533425	0.603271	0.765873
AC104655.2	0.670073	0.0001	0.321604	0.262927	0.149338	0.400806	0.444225	0.400521	0.314195	0.2037	0.411971	0.251043	0.244918	0.0001	0.1786	0.0601504	0.207339	0.780275
AC104695.3	0.110598	0.196663	0.186755	0.110407	0.0001	0.0320453	0.132741	0.104132	0.0230529	0.116861	0.274681	0.0001	0.0001	0.0001	0.0001	0.0001	0.0001	0.0001
AC104843.3	0.837841	0.196663	0.124537	0.882557	0.0001	0.383444	0.198999	0.479015	0.241105	0.467143	0.320332	0.0001	0.0783081	0.742952	0.171876	0.118617	0.801358	0.218892
AC105020.1	0.0553489	0.0001	0.37341	0.0001	0.0001	0.191772	0.132741	0.286188	0.16077	0.350382	0.411971	0.491314	0.234724	0.0001	0.0001	0.0593583	0.601043	0.109496
AC105053.3	0.0553489	0.0001	0.0623184	0.036869	0.0001	0.0001	0.132741	0.0521161	0.0919114	0.0390202	0.13739	0.0001	0.0001	0.0001	0.0001	0.0001	0.100257	0.0001
AC105206.1	0.0553489	0.0001	0.0001	0.0001	0.149338	0.0639907	0.132741	0.0001	0.114864	0.0390202	0.0001	0.0001	0.0392041	0.0001	0.0001	0.0593583	0.0001	0.0001
AC105342.1	0.0553489	0.0001	0.0001	0.0001	0.0001	0.0001	0.0664205	0.026108	0.0345293	0.0001	0.0001	0.0001	0.0001	0.495334	0.0001	0.0001	0.200414	0.0001
AC105399.2	0.110598	0.0001	0.124537	0.110407	0.149338	0.095936	0.165901	0.0521161	0.0919114	0.0001	0.0001	0.122903	0.0392041	1.23819	0.171876	0.0001	0.200414	0.109496
AC105402.3	0.165847	0.0001	0.0001	0.0372784	0.0001	0.0320453	0.0332603	0.13014	0.0001	0.0779404	0.0001	0.0001	0.0392041	0.0001	0.171876	0.0593583	0.0001	0.218892
AC105760.2	0.791925	1.01416	0.89051	0.257483	0.311915	0.101493	0.453194	0.347087	0.620732	0.64012	0.854608	0.388927	0.493925	0.0001	0.515429	0.437242	0.500886	0.671293
AC106875.1	0.0001	0.786353	0.248973	0.0001	0.0001	0.0639907	0.0332603	0.0001	0.0345293	0.0001	0.0001	0.122903	0.0001	0.0001	0.0001	0.0593583	0.0001	0.0001
AC107021.1	0.221096	0.196663	0.186755	0.735481	0.746292	0.766788	0.530664	0.442236	0.562445	0.0779404	0.411971	0.491314	0.310334	0.0001	0.171876	0.414908	0.100257	0.218892
AC107081.5	0.672361	0.437871	0.555646	0.452563	1.68563	0.64423	1.0158	1.1085	0.823445	0.771091	0.9468	0.704698	1.08903	0.0001	0.752426	0.959633	1.93623	1.51676
AC107613.1	0.026409	0.786346	0.00441121	0.110406	0.0001	0.255661	0.141925	0.0001	0.0001	0.0390199	0.0001	0.491309	0.11608	0.0001	0.0818982	0.00278545	0.100256	0.109495
AC107982.4	0.000101588	0.0001	0.0001	0.214919	0.0001	0.000101199	0.000108845	0.000100001	0.000100001	0.000101498	0.0001	0.0001	0.0001	0.00108665	0.0001	0.332093	0.0001066	0.0001
AC107983.4	0.204055	1.97667	3.2196	0.36988	2.10416	2.58514	0.283425	1.4652	2.91184	0.183278	2.92532	3.09796	0.294262	2.98099	3.4634	0.248268	1.72636	3.663
AC108004.2	0.110598	0.0001	0.0001	0.183945	0.0001	0.0320453	0.0664205	0.0001	0.0345293	0.0390202	0.0001	0.245707	0.0392041	0.0001	0.0001	0.177875	0.0001	0.0001
AC108004.2	0.110598	0.0001	0.0001	0.183945	0.0001	0.0320453	0.0664205	0.0001	0.0345293	0.0390202	0.0001	0.245707	0.0392041	0.0001	0.0001	0.177875	0.0001	0.0001
AC108004.2	0.110598	0.0001	0.0001	0.183945	0.0001	0.0320453	0.0664205	0.0001	0.0345293	0.0390202	0.0001	0.245707	0.0392041	0.0001	0.0001	0.177875	0.0001	0.0001
AC108463.1	0.0553489	0.0001	0.186755	0.036869	0.0001	0.0320453	0.0664205	0.0781241	0.0460057	0.0779404	0.0001	0.122903	0.0392041	0.0001	0.343653	0.118617	0.200414	0.109496
AC108463.2	0.276345	0.0001	0.0623184	0.036869	0.0001	0.0320453	0.0001	0.0521161	0.0460057	0.194701	0.0001	0.0001	0.0392041	0.0001	0.0001	0.0593583	0.0001	0.218892
AC108479.2	0.581432	0.537558	0.207113	0.153606	0.186621	0.197925	0.10675	0.114595	0.275783	0.520266	0.0001	0.0001	0.255767	0.0001	0.0001	0.0001	0.216901	0.328289
AC108488.4	2.26256	1.37604	1.05781	0.36779	1.34325	0.447335	0.762786	0.39022	0.550969	1.3616	1.09842	1.71935	0.430245	0.0380854	0.171876	0.474166	0.811644	0.542372
AC108868.3	0.0001	0.0001	0.063345	0.0001	0.0001	0.0337117	0.0336235	0.0808158	0.0469034	0.0001	0.0001	0.126765	0.0398938	0.0001	0.0001	0.123294	0.0001	0.0001
AC109333.10	0.110598	0.0001	0.0623184	0.036869	0.298577	0.223717	0.0001	0.0521161	0.137817	0.233621	0.274681	0.0001	0.0392041	0.0001	0.343653	0.237133	0.500886	0.109496
AC109631.1	0.110598	0.0001	0.0623184	0.0001	0.0001	0.0320453	0.0332603	0.0001	0.0574821	0.0001	0.0001	0.0001	0.0001	0.0001	0.0001	0.0001	0.0001	0.0001
AC109828.1	0.71815	0.393227	0.383093	0.257781	0.0001	0.13208	0.34762	0.388605	0.301607	0.566113	0.274681	0.0001	0.336462	0.0001	0.259596	0.771466	0.36855	0.000100087
AC110615.1	0.116386	0.0001	0.0001	0.116658	0.0001	0.0342866	0.0001	0.0307931	0.0258116	0.0001	0.0001	0.135293	0.041616	0.0001	0.0001	0.0667257	0.104341	0.0001
AC111155.1	0.0553489	0.0001	0.0623184	0.220714	0.0001	0.095936	0.0001	0.104132	0.0115795	0.0390652	0.0001	0.122903	0.0001	0.0001	0.0001	0.0001	0.100257	0.328289
AC112198.1	1.21558	0.196663	1.12003	0.588405	0.597053	0.89457	0.464344	0.234172	0.413251	0.272541	0.686551	0.245707	0.430245	0.247717	0.171876	0.7112	0.601043	0.218892
AC112229.1	0.215551	0.393227	0.37341	0.0736381	0.0001	0.095936	0.143211	0.13014	0.0495417	0.155781	0.000100127	0.0001	0.273828	0.000100114	0.0001	0.222359	0.200414	0.475546
AC112229.4	2.81137	1.72648	1.7261	0.657074	0.0001	0.532614	1.9132	0.313885	1.22747	2.63293	0.636599	1.23666	1.01189	0.15283	0.853998	2.25369	0.924227	1.92395
AC113189.5	0.49734	0.393227	0.560065	0.36779	0.149338	0.47928	0.596985	0.208164	0.434121	0.622823	0.13739	0.122903	0.352037	0.0001	0.171876	0.474166	0.400729	0.109496
AC114730.11	0.134191	0.0001	0.0915313	0.0001	0.0001	0.178756	0.0001	0.115605	0.0508947	0.12655	0.0001	0.0001	0.126512	0.247717	0.0001	0.062587	0.112296	0.232465
AC114752.2	2.36122	0.982916	0.37341	3.10199	0.447815	0.543171	0.926098	1.11092	0.377827	0.760967	0.961132	0.491314	0.423651	0.742952	0.171876	0.651941	0.801358	0.109496
AC114755.3	0.110598	0.0001	0.0001	0.110407	0.149338	0.0320453	0.0001	0.0521161	0.0574821	0.0390202	0.0001	0.0001	0.0001	0.0001	0.0001	0.177875	0.0001	0.0001
AC114755.7	0.128455	0.0001	0.0001	0.0786775	0.0001	0.0001	0.0001	0.0697402	0.0513564	0.0001	0.0001	0.000100002	0.0001	0.0001	0.0001	0.0001	0.0001	0.0001
AC114776.1	0.544902	0.490854	0.0707439	0.368141	0.545823	0.597589	0.214289	0.227819	0.230463	0.115257	0.0001	0.516269	0.102667	0.28878	0.0001	0.135507	0.36143	0.109496
AC115617.2	1.43657	0.393227	1.3689	0.668581	0.775182	0.320743	0.551117	0.5233	0.518667	1.20663	0.274681	0.620253	0.877156	0.247717	0.524931	1.00749	0.300572	0.22154
AC115617.2	1.43657	0.393227	1.3689	0.668581	0.775182	0.320743	0.551117	0.5233	0.518667	1.20663	0.274681	0.620253	0.877156	0.247717	0.524931	1.00749	0.300572	0.22154
AC115618.1	0.386842	0.196663	0.248973	0.36779	0.149338	0.255831	0.336121	0.39022	0.252632	0.358341	0.13739	0.36851	0.430245	0.247717	0.687206	0.177875	0.0001	0.547081
AC116035.1	0.0553489	0.0001	0.0001	0.0001	0.0001	0.223717	0.165901	0.182156	0.126341	0.0779404	0.0001	0.245707	0.156516	0.990569	0.0001	0.118617	0.200414	0.0001
AC116366.6	0.544458	0.276772	0.602953	2.14883	3.07182	2.58961	4.33832	2.70913	2.48187	0.763098	1.93257	0.640067	0.165222	0.495334	0.858982	0.877691	0.500886	0.875269
AC116407.2	0.0553489	0.0001	0.124537	0.0001	0.0001	0.0320453	0.0001	0.0001	0.0574821	0.0001	0.0001	0.0001	0.0001	0.0001	0.0001	0.0001	0.100257	0.0001
AC117395.1	0.165847	0.0001	0.311192	0.183945	0.0001	0.095936	0.298542	0.13014	0.229629	0.467143	0.274681	0.36851	0.234724	0.495334	1.20253	0.651941	0.601043	0.0001
AC118138.2	0.000100026	0.000100005	0.000101875	0.0001	0.000100023	0.000100005	0.230158	0.176089	0.121958	0.148833	0.369541	0.000100901	0.352096	0.0001	0.000100724	0.000101207	0.000100014	0.000101715
AC122129.1	0.110598	0.0001	0.0001	0.036869	0.149338	0.0001	0.0664205	0.0001	0.103388	0.272541	0.13739	0.245707	0.0001	0.0001	0.171876	0.118617	0.100257	0.0001
AC123023.1	0.442091	0.0001	0.186755	0.331021	0.0001	0.0001	0.398023	0.026108	0.0001	0.233621	0.0001	0.0001	0.0783081	0.0001	0.0001	0.0593583	0.0001	0.0001
AC123768.4	0.0659382	0.0001	0.417104	0.0736381	0.298577	0.095936	0.17897	0.073655	0.0985947	0.324953	0.354171	0.000100154	0.0001	0.0001	0.0001	0.0001	0.200414	0.164364
AC124309.1	0.0799271	1.54779	0.0450484	0.000188355	0.00367129	0.0461576	0.928153	0.175949	0.389407	0.0658882	0.0001	0.0001	0.000126361	0.974936	1.01449	0.000100024	0.591558	0.538448
AC124789.1	0.386842	0.393227	0.808939	0.036869	0.298577	0.47928	0.298542	0.104132	0.172246	0.194701	0.0001	0.36851	0.19562	0.247717	0.171876	0.0593583	0.100257	0.109496
AC124789.1	0.386842	0.393227	0.808939	0.036869	0.298577	0.47928	0.298542	0.104132	0.172246	0.194701	0.0001	0.36851	0.19562	0.247717	0.171876	0.0593583	0.100257	0.109496
AC125232.1	4.52422	5.0385	5.69718	4.47244	1.8143	3.00261	3.07753	2.38708	2.67634	4.52878	3.69558	3.06414	2.28978	5.95043	3.12123	1.94587	3.03487	2.27398
AC125238.2	1.04983	0.393227	0.0623184	0.772599	0.0001	0.607061	0.265851	0.442649	0.310499	0.233731	0.13739	0.0001	0.19562	0.495334	0.344232	0.296391	0.300572	0.109789
AC127496.1	1.82331	2.35886	0.933376	1.94886	1.64172	1.50153	0.762786	1.17046	1.11331	1.12879	1.23571	0.982527	1.09501	1.23819	0.343653	1.48156	1.60262	1.64104
AC127904.2	0.0553489	0.0001	0.0001	0.183945	0.447815	0.095936	0.0001	0.0001	0.0689586	0.0390202	0.0001	0.36851	0.312933	0.0001	0.0001	0.0001	0.0001	0.0001
AC129778.2	0.104071	0.356597	0.124537	0.0001	0.0001	0.0743999	0.0544607	0.026108	0.0409703	0.0778757	0.0001	0.0001	0.0001	0.0001	0.0001	0.0001	0.0001	0.0001
AC131097.3	0.0001	0.0001	0.0001	0.036869	0.0001	0.0320453	0.0001	0.0781241	0.0345293	0.0390202	0.13739	0.0001	0.0001	0.0001	0.0001	0.0593583	0.0001	0.0001
AC131180.1	4.24617	1.97782	0.610538	3.17228	1.33521	1.62496	2.19425	1.18169	0.762453	1.38614	1.20421	0.298487	1.40446	0.776422	0.0454039	1.10387	0.337741	1.09237
AC131971.1	0.110598	0.0001	0.124537	0.220714	0.447815	0.127881	0.364863	0.156148	0.0919114	0.233621	0.274681	0.0001	0.391141	0.495334	0.171876	0.118617	0.300572	0.0001
AC132872.1	1.08478	2.19101	1.55185	0.501457	0.733174	1.50831	0.942163	1.52104	1.70871	1.44395	0.956995	1.64337	1.23873	1.41726	1.42326	1.97293	2.18116	2.10267
AC132872.2	0.49734	0.196663	0.248973	0.257483	0.0001	0.511225	0.398023	0.728325	0.436204	0.350382	0.549261	0.36851	0.547557	0.247717	0.343653	0.296391	0.400729	0.0001
AC133528.2	0.663087	0.196663	0.186755	0.404559	0.298577	0.415389	0.199062	0.416228	0.459157	0.428222	0.13739	0.491314	0.19562	0.0001	0.858982	0.888974	0.200414	0.328289
AC133644.3	0.204803	0.0001	0.0001	0.735481	0.149338	0.0320453	0.0001	0.13014	0.0574821	0.116861	0.13739	0.245707	0.0392041	0.0001	0.171876	0.0593583	0.0001	0.0001
AC133965.1	0.0001	0.0001	0.0001	0.0001	0.0001	0.0320453	0.0664205	0.0001	0.0460057	0.0390202	0.0001	0.0001	0.0392041	0.0001	0.0001	0.0001	0.100257	0.0001
AC135048.1	0.197457	0.0001	0.0001	0.110407	0.0001	0.0400326	0.165603	0.137147	0.0707675	0.233621	0.0001	0.0001	0.078308	0.0001	0.0001	0.0001	0.0001	0.184652
AC135048.13	0.610417	0.825907	1.12839	0.467794	0.473265	0.280258	0.0955962	0.0643285	0.103801	0.909358	0.000100048	0.611961	0.517478	0.000305747	0.463048	0.161732	0.376366	0.0001
AC135050.5	0.0001	0.0001	0.0001	0.0001	0.0001	0.0001	0.0664205	0.0521161	0.0345293	0.0390202	0.0001	0.0001	0.0783081	0.0001	0.171876	0.0001	0.200414	0.109496
AC135178.1	1.38132	1.57261	1.30669	1.25025	0.447815	1.0543	0.928588	1.63861	1.04446	2.80236	3.43236	1.96495	1.52516	1.23819	1.54609	2.07414	2.50403	2.07863
AC135178.7	0.0553489	0.0001	0.124537	0.294252	0.149338	0.127881	0.199062	0.182156	0.137817	0.272541	0.549261	0.245707	0.19562	0.247717	0.343653	0.296391	0.100257	0.218892
AC135983.2	0.0001	0.196663	0.0623184	0.0001	0.298577	0.191772	0.0332603	0.0521161	0.172246	0.0001	0.13739	0.0001	0.0001	0.0001	0.0001	0.0001	0.0001	0.218892
AC136289.1	0.0001	0.196663	0.0001	0.0001	0.0001	0.0001	0.0001	0.0001	0.0115764	0.0390202	0.13739	0.122903	0.0392041	0.0001	0.343653	0.0001	0.200414	0.328289
AC137932.1	0.237348	0.431344	0.673344	0.380284	0.985594	0.487919	0.390196	0.390651	0.324145	0.550394	1.33803	0.904586	0.423082	0.0001	0.744627	0.318175	0.757053	0.4671
AC137932.5	0.0001	0.393227	0.0001	0.036869	0.0001	0.0639907	0.0332603	0.026108	0.0001	0.0779404	0.0001	0.0001	0.156516	0.0001	0.343653	0.0593583	0.0001	0.0001
AC137932.6	0.0001	0.0001	0.124537	0.036869	0.0001	0.0001	0.0001	0.0521161	0.0230529	0.311462	0.0001	0.122903	0.0392041	0.0001	0.171876	0.35565	0.200414	0.218892
AC137934.1	0.471965	0.58979	0.124537	0.511266	0.224375	0.640311	0.152183	0.456964	0.223419	0.438335	0.616275	0.297927	0.0392041	1.11834	0.0001	0.177875	0.100257	0.328289
AC138031.1	0.00130138	0.000146221	0.0001	0.000121696	0.109764	0.0001	0.000189481	0.169811	0.000129125	0.0356418	0.23564	0.0001	0.000551319	0.0778695	0.0001	0.0320144	0.000821863	0.0001
AC138035.2	1.20272	2.71571	2.92603	1.74221	1.51266	2.90145	2.09165	2.83771	1.83255	2.64243	3.06429	3.14064	3.08944	2.30142	5.44963	2.46546	1.11435	1.76032
AC138517.4	0.331593	0.0001	0.0623184	0.246825	0.0001	0.159827	0.165901	0.182156	0.080435	0.0779404	0.0001	0.0001	0.0787564	0.0001	0.0001	0.0593583	0.100257	0.0001
AC138623.1	0.0553489	0.196663	0.0001	0.036869	0.0001	0.0320453	0.0001	0.182156	0.0230529	0.0001	0.0001	0.122903	0.0392041	0.0001	0.0001	0.0001	0.0001	0.0001
AC138783.12	0.128556	1.09209	0.13379	0.0763292	0.000506174	0.000185951	0.376026	0.211058	0.0391348	0.281184	0.398761	0.000100297	0.127844	1.20083	0.934509	0.106962	0.516223	0.23256
AC139099.3	0.0001	0.719256	1.03266	0.0001	0.478332	0.762821	0.0001	0.655136	1.25906	0.0001	0.142905	1.25518	0.041441	0.551763	0.0001	0.0619208	0.80604	1.89842
AC139099.5	0.0001	0.196663	0.0001	0.036869	0.0001	0.223704	0.0001	0.0001	0.103388	0.0390202	0.0001	0.122903	0.0001	0.0001	0.515429	0.0001	0.0001	0.0001
AC139100.2	0.110598	0.0001	0.124537	0.0736381	0.0001	0.0001	0.0001	0.182156	0.114864	0.116861	0.13739	0.122903	0.352037	0.247717	0.0001	0.296391	0.300572	0.0001
AC139100.3	0.11522	0.0001	0.0001	0.038564	0.149338	0.0333774	0.203684	0.11033	0.0117202	0.159537	0.0001	0.0001	0.0001	0.286483	0.0001	0.128187	0.0001	0.0001
AC139426.2	0.165847	0.0001	0.0001	0.0001	0.0001	0.0639907	0.0332603	0.156148	0.137817	0.233621	0.0001	0.491314	0.0392041	0.0001	0.0001	0.0593583	0.0001	0.0001
AC139452.2	0.911481	0.590064	0.186755	0.259304	0.0747192	0.227895	0.223999	0.0834383	0.214316	0.386069	0.15768	0.0001	0.156516	0.495334	0.171876	0.0001	0.150336	0.109496
AC140481.1	1.1571	0.0299838	0.193946	0.129487	0.435817	0.18595	0.227359	0.187666	0.258421	0.284929	0.0001	0.78707	0.451613	0.0001	0.38132	0.561058	0.250232	0.511227
AC141586.5	6.02223	3.34168	4.08632	13.1371	10.4468	8.63217	7.75997	7.03648	7.7011	6.17787	4.53068	6.68727	9.34597	16.0952	12.5398	5.92593	7.3843	8.75179
AC142528.1	0.058797	0.20078	0.0001	0.0001	0.0001	0.0985062	0.0001	0.0001	0.0236365	0.123814	0.142864	0.249653	0.0802709	0.0001	0.176991	0.0001	0.0001	0.110042
AC144449.1	0.391114	0.0001	0.0628673	0.036869	0.447815	0.161101	0.101469	0.0001	0.173273	0.239682	0.13739	0.245707	0.040042	0.0001	0.171876	0.237431	0.200414	0.333364
AC144450.2	0.0001	0.0001	0.0001	0.0001	0.298577	0.0001	0.0001	0.182156	0.114864	0.0001	0.0001	0.0001	0.117412	0.742952	0.0001	0.177875	0.300572	0.328289
AC144530.1	3.53069	2.03566	0.905882	3.87655	1.25163	1.65956	1.12161	1.93625	1.07607	0.802832	1.0357	0.772634	0.679625	1.4858	1.04763	0.48884	1.95802	0.905796
AC144652.1	0.386842	0.0001	0.497847	0.147176	0.447815	0.255663	0.729626	0.910381	0.470634	0.350382	0.549261	0.245707	0.352037	0.495334	0.171876	0.474166	0.200414	0.328289
AC144831.1	2.7073	5.11075	4.91535	0.735481	1.04477	1.21402	0.696466	0.858365	0.757544	1.94611	3.70694	1.47374	0.469349	0.742952	0.858982	0.237133	0.701201	0.875269
AC147651.3	0.110598	0.0001	0.0623184	0.0001	0.0001	0.095936	0.132741	0.13014	0.0689586	0.116861	0.411971	0.614117	0.0001	0.990569	0.0001	0.237133	0.100257	0.328289
AC147651.4	0.552589	0.0001	0.124537	0.77225	0.298577	0.862624	1.79075	1.53457	1.58385	0.194701	0.13739	0.122903	1.05591	0.742952	0.343653	2.01488	2.00324	1.96923
AC156455.1	0.607838	0.196663	0.684502	0.478098	0.597053	0.287608	0.596985	0.182156	0.32144	0.544983	0.823842	0.73692	0.156516	0.742952	0.687206	0.592683	0.100257	0.0001
AC159540.1	4.3881	9.6317	5.80725	6.31457	3.8803	5.92535	3.73569	3.99062	3.59392	5.31817	8.64939	5.64906	4.29419	5.6953	5.95228	4.2667	4.2067	3.71957
AC159540.2	0.197756	0.0001	0.258614	0.0001	0.0001	0.0431789	0.0779408	0.000107696	0.0649043	0.0390205	0.0001	0.0001	0.0001	0.000101365	0.000211867	0.0001	0.0001	0.109496
AC174470.1	0.29647	0.764485	0.438498	0.0229445	1.20573	0.92649	0.935981	1.60312	0.951749	1.17554	1.33373	0.855535	0.0696675	0.731278	1.54506	0.469223	0.275113	1.69364
AC226118.1	0.331593	0.0001	0.248973	0.331021	0.0001	0.159827	0.232222	0.182156	0.298487	0.428222	0.411971	0.122903	0.117412	0.0001	0.0001	0.0593583	0.200414	0.218892
AC226150.4	0.49734	0.196663	0.248973	0.0736381	0.0001	0.0320453	0.165901	0.0521161	0.0574821	0.194701	0.0001	0.0001	0.0783081	0.0001	0.171876	0.0593583	0.400729	0.109496
ACAA1	28.6729	22.2118	21.0921	18.6052	14.3268	16.8034	19.7926	12.8221	17.1918	27.8669	21.525	17.561	18.2733	14.3619	15.2882	17.5998	11.5182	14.878
ACAA2	34.4753	29.0915	31.7761	19.9591	14.1489	16.7063	22.396	17.1099	21.6485	27.7114	21.4174	22.3442	18.4795	12.6286	17.6836	20.385	13.4212	17.282
ACACA	67.6799	56.4137	71.3022	41.4386	54.7706	53.093	73.1517	85.0459	79.1891	78.5027	85.5319	104.137	61.7454	71.3138	71.8026	71.8806	75.9194	88.3923
ACACB	5.13825	3.14511	1.74221	0.882557	1.49248	0.447335	0.331703	0.806349	0.424728	6.38301	2.74591	2.94738	1.40785	0.0001	1.20253	0.770458	0.200414	0.547081
ACAD10	9.11617	11.2042	9.02177	4.41239	4.32801	4.63217	6.23423	7.23033	7.87294	8.95175	9.19855	7.2455	4.10603	4.45721	4.98162	4.68151	6.71064	7.65783
ACAD11	17.7841	19.3707	14.7931	9.61165	11.9329	9.57223	12.7102	11.9819	13.0419	24.8327	20.5332	19.5469	12.9982	9.29665	10.2834	13.2347	11.6347	9.91905
ACAD8	20.6632	24.7671	18.6656	8.08929	12.6854	12.2032	14.5243	13.9404	13.439	27.9059	27.5954	21.1223	15.4071	12.6286	16.6624	18.785	18.1286	19.8008
ACAD9	31.3263	34.3987	26.6874	26.1194	24.6244	26.7685	30.1403	25.1459	28.5517	28.4396	23.614	27.6308	26.63	19.0666	27.4577	26.6071	29.9471	32.3814
ACADM	31.2157	31.2537	29.5538	30.5551	26.5645	22.1063	27.9874	24.7337	23.6301	40.3992	38.9905	36.2271	35.2329	37.3903	30.5763	33.3033	32.8517	29.6465
ACADS	5.74599	5.70044	3.60877	1.25025	3.58182	2.65156	3.97933	3.04304	4.05128	3.77536	2.74591	3.6842	1.99441	1.98104	2.40497	2.1334	2.30372	1.96923
ACADSB	19.282	22.4083	22.4609	16.6565	21.3412	18.2728	14.3253	16.3852	16.9967	19.1488	26.909	21.7363	9.69791	8.41909	14.0858	10.1333	14.2224	14.0028
ACADVL	121.382	120.1	98.8029	101.041	100.438	104.174	157.412	143.278	134.676	168.213	161.591	140.364	143.356	154.018	141.887	192.886	178.881	172.08
ACAN	0.331593	0.196663	0.186755	0.0736381	0.0001	0.191772	0.0664205	0.468244	0.126341	0.116861	0.13739	0.245707	0.0783081	0.247717	0.0001	0.118617	0.200414	0.0001
ACAP1	0.442091	0.58979	0.808939	0.147176	0.597053	0.447335	0.663305	0.39022	0.344393	0.817424	0.961132	0.491314	0.430245	0.247717	0.171876	0.237133	0.200414	0.109496
ACAP2	57.459	82.9498	82.7506	58.5364	62.9787	68.0437	67.6139	65.5402	70.4196	64.1017	79.2166	89.401	51.9303	47.7902	58.4041	67.3768	65.7032	64.6532
ACAP2-IT1	0.110598	0.196663	0.0623184	0.036869	0.0001	0.0320453	0.0001	0.0521161	0.0689586	0.0001	0.0001	0.245707	0.117412	0.0001	0.171876	0.0593583	0.100257	0.109496
ACAP3	12.5995	12.9733	15.8658	7.0121	8.35745	12.7463	9.95296	8.37751	11.1308	18.5261	16.6122	18.4206	14.4295	11.8857	16.4906	21.5639	20.6325	21.7699
ACAT1	27.1273	31.8433	24.3275	20.6644	18.5057	17.9534	17.9398	18.7259	18.5345	23.1576	25.2615	24.8064	17.9879	20.3047	18.0366	16.8294	17.127	17.3941
ACAT2	17.7289	8.55793	13.3151	12.946	12.9423	9.30793	21.4291	14.2534	14.4505	11.6032	7.99209	9.95527	8.6779	7.24892	8.78382	7.62617	6.30715	6.42922
ACBD3	61.3131	60.1485	63.8285	128.456	127.563	111.19	81.7906	77.4156	76.072	48.0634	56.2237	63.2438	80.0678	106.971	96.3667	57.4102	79.711	78.3278
ACBD4	3.42553	3.14511	2.05331	0.514867	1.19401	0.862624	1.79075	1.69062	1.29694	3.93104	3.84423	2.94738	1.17322	0.990569	0.343653	1.48156	1.10183	0.984666
ACBD5	33.039	39.5093	33.5981	22.6866	21.9382	21.8187	33.7241	29.1291	30.3093	55.9672	57.5247	58.5773	40.9422	29.9618	35.9014	47.4659	45.4715	44.3055
ACBD6	26.4091	22.998	24.1408	15.7372	17.9087	18.4645	20.062	17.7116	20.1871	22.4181	19.2207	23.2099	17.7533	13.3714	18.0366	19.7331	21.3336	20.8948
ACBD7	0.663087	1.17948	1.24447	0.625174	0.0001	0.287608	0.795947	0.0781241	0.229629	0.583903	0.13739	0.859724	0.782181	0.495334	0.343653	0.651941	0.400729	0.109496
ACCS	5.85648	12.7767	6.71968	1.5444	1.19401	2.52378	1.98972	1.92469	2.08881	8.83499	9.885	6.63148	2.07262	1.73342	2.06142	1.65933	0.901515	0.984666
ACD	9.17142	11.0076	8.15071	10.4793	11.7899	7.69893	10.6777	10.4553	10.6158	8.48471	8.10023	9.08755	7.23435	5.6953	6.5276	8.11849	10.5166	6.89206
ACE	143.979	105.161	132.09	69.0156	63.5756	84.8148	37.604	37.2437	49.6699	166.112	135.917	192.556	121.535	101.028	131.581	84.9171	74.5172	103.051
ACER2	6.34776	5.28764	3.60877	0.882557	0.447815	0.95846	0.762786	0.520261	1.09036	8.44342	8.64347	7.85952	1.32964	1.23819	1.71786	1.06675	1.4023	0.875269
ACER3	53.4259	65.2591	50.397	49.1972	63.1279	46.449	40.5218	47.4646	40.6266	58.4194	65.0757	64.349	60.1031	61.6567	60.9806	47.3475	60.1946	54.3699
ACER3	53.4259	65.2591	50.397	49.1972	63.1279	46.449	40.5218	47.4646	40.6266	58.4194	65.0757	64.349	60.1031	61.6567	60.9806	47.3475	60.1946	54.3699
ACHE	0.331593	0.196663	0.124537	2.90485	3.73106	4.31272	12.9326	11.6517	9.67472	0.311462	0.274681	0.245707	0.664869	1.73342	0.515429	1.30378	3.30529	1.31285
ACIN1	190.787	174.768	167.791	172.478	134.912	134.419	157.173	151.63	142.273	207.798	210.065	192.526	172.143	194.262	171.711	213.17	204.45	194.395
ACKR3	87.7356	57.9863	50.2103	746.485	896.476	568.208	548.351	633.2	511.773	82.5104	38.716	36.9639	693.501	625.483	402.297	399.166	402.036	283.776
ACKR4	20.5854	26.4868	13.8126	8.01575	13.2823	5.94193	3.64773	2.36683	2.78887	26.0985	23.7043	12.526	6.10034	4.45721	5.8405	5.51112	3.00482	1.85983
ACLY	211.88	203.443	204.948	178.773	182.519	188.223	244.693	222.159	224.319	262.951	221.589	263.168	290.159	231.026	275.874	300.201	261.81	284.759
ACLY	211.88	203.443	204.948	178.773	182.519	188.223	244.693	222.159	224.319	262.951	221.589	263.168	290.159	231.026	275.874	300.201	261.81	284.759
ACN9	1.65757	3.7348	3.35989	1.32379	2.53715	1.3418	1.32651	1.63861	1.82485	2.72451	4.66797	2.94738	1.56426	1.98104	0.858982	1.54082	3.5056	2.9538
ACO1	77.9009	63.097	70.8669	93.981	107.751	109.316	96.43	86.9952	95.8599	49.3903	40.0889	50.7179	55.8401	52.7426	62.5267	46.6367	43.6687	47.9155
ACO2	72.2275	66.5428	68.6148	58.8213	58.8687	63.4561	54.9078	59.2387	63.5278	56.3792	45.2038	58.2812	55.9186	64.0448	63.1541	58.6753	75.6855	71.6632
ACOT1	2.56759	3.33709	1.6479	0.875852	2.74168	1.96823	1.82398	3.6346	2.60408	2.07643	2.18051	1.61333	1.29448	1.42427	1.45179	0.928444	2.12228	1.32281
ACOT11	1.87856	2.75199	1.74221	1.0664	0.447815	0.89457	1.39283	0.962397	1.28523	2.02395	2.19674	2.82458	1.36874	0.742952	1.03076	1.71859	0.701201	1.64104
ACOT13	13.5314	16.8224	14.8127	14.9209	12.1053	13.2701	11.3114	13.7085	13.7296	9.95967	16.0925	9.29751	9.51404	13.0882	12.3639	9.89551	9.36246	9.87776
ACOT2	11.9631	11.4054	8.55611	5.92663	6.06358	7.04055	12.601	9.29158	9.79067	14.7373	7.84188	9.19356	9.57665	5.26159	7.48079	12.8197	7.59318	7.2103
ACOT4	0.331593	0.196663	0.311192	0.147176	0.0001	0.319553	1.32651	1.27449	1.09036	0.428222	0.13739	0.0001	0.234724	0.0001	0.0001	0.651941	0.300572	0.437685
ACOT7	21.6577	15.2003	17.6079	13.6046	14.1778	13.8005	12.6341	11.0015	14.1504	13.2715	9.06126	10.9296	8.91582	8.41909	10.1349	11.5555	7.51189	12.1431
ACOT8	6.85922	9.28253	6.62615	3.92599	5.23883	4.12742	3.94607	5.43303	5.41205	8.41287	11.849	9.06175	4.16521	5.46468	4.40052	5.6985	7.16528	4.81112
ACOT9	39.9451	42.8509	37.4555	49.1604	53.8751	55.7445	59.0255	58.2323	60.6071	37.636	37.3431	42.7357	51.07	57.6949	49.1281	56.5917	66.1039	68.9198
ACOX1	51.2994	53.8585	51.8801	31.8301	42.2491	40.3703	43.4754	47.8918	43.6739	54.2687	52.8455	55.6567	46.3811	36.6475	42.0969	57.9836	45.8867	52.9598
ACOX2	5.1935	2.75199	1.61778	0.845788	0.597053	0.319553	0.663305	0.780341	0.298487	7.39494	5.07984	1.71935	0.899494	0.742952	0.171876	1.24452	0.601043	0.437685
ACOX3	18.4532	16.9045	14.3103	9.33944	10.8945	13.1935	13.3306	15.683	11.5569	15.9185	12.4935	12.4032	11.614	10.4	6.87116	13.274	17.9282	9.40817
ACP1	61.6426	62.5072	60.8375	50.0428	54.3229	58.3594	49.8069	56.9317	56.7674	47.5575	50.2483	59.5598	38.3741	40.3617	45.8644	46.4586	62.6985	57.2144
ACP2	44.3097	44.0303	29.6161	27.6136	25.2214	26.355	41.5832	34.2008	33.7979	58.2634	45.0313	34.8763	31.6744	30.7047	31.4352	41.4219	31.2491	35.7727
ACP5	2.5968	25.1602	1.99109	1.72824	17.1625	0.734843	0.563825	4.81158	0.287011	5.21541	15.5139	0.982527	2.30724	9.65717	0.171876	0.118617	2.50403	0.218892
ACP6	5.13825	4.32449	4.54204	1.02963	0.89553	1.11819	1.98972	1.14445	1.83633	5.87705	5.49171	5.03504	1.79889	0.0001	1.88964	2.37043	0.901515	1.31285
ACP6	5.13825	4.32449	4.54204	1.02963	0.89553	1.11819	1.98972	1.14445	1.83633	5.87705	5.49171	5.03504	1.79889	0.0001	1.88964	2.37043	0.901515	1.31285
ACPL2	2.81779	3.7348	2.61327	1.98563	0.746292	1.56542	2.255	2.18478	2.51344	2.84128	4.53068	3.31579	2.38545	2.72389	2.57675	3.49634	5.50875	4.04776
ACR	0.718336	1.17948	0.808939	0.882557	0.149338	0.223717	0.398023	0.468244	0.459157	0.428222	0.411971	0.36851	0.19562	0.247717	0.171876	0.0593583	0.601043	0.328289
ACRBP	1.27082	2.55542	0.684502	0.514867	0.597053	0.607061	0.497504	0.936389	0.436204	0.856345	1.51029	0.73692	0.508453	0.0001	0.515429	0.7112	0.500886	0.109496
ACRC	1.27082	1.17948	1.3689	0.809019	0.746292	0.798733	0.795947	0.936389	0.883785	2.68559	1.78487	1.96495	1.09501	3.96198	1.03076	1.18527	0.901515	0.984665
ACRV1	0.165847	0.0001	0.0001	0.0736381	0.149338	0.0001	0.0332603	0.0521161	0.0689586	0.0001	0.0001	0.122903	0.0783081	0.247717	0.0001	0.0001	0.0001	0.0001
ACSBG1	0.802196	0.581312	1.78937	0.846698	0.886917	0.855888	0.610928	1.1963	1.26549	0.3985	0.637797	0.697784	0.421142	1.3735	0.812676	0.378326	1.42854	0.872192
ACSF2	12.7074	6.48669	11.1994	5.95669	2.68639	7.85865	5.86947	2.65292	6.9663	11.754	4.39339	7.85952	4.8099	1.73342	4.98162	2.78524	2.40387	2.18802
ACSF3	15.6866	13.3605	14.4348	8.08929	10.596	10.4462	14.3253	18.0234	17.203	15.3732	16.4749	15.7189	12.748	17.3333	15.1164	14.9332	18.3289	18.8162
ACSL1	14.5306	19.0667	25.0741	13.8988	20.4457	27.0259	26.7605	39.9744	43.5187	5.76029	9.06126	12.4032	7.97733	13.8667	16.6624	13.9851	22.7358	23.4109
ACSL3	60.9396	75.2838	90.59	193.368	188.19	252.943	307.297	287.46	310.398	71.6912	107.91	115.067	60.4941	91.6185	88.9802	80.8879	109.873	106.99
ACSL4	92.0991	85.1119	106.392	113.836	117.302	112.674	143.321	121.194	130.833	60.7932	57.5246	74.6645	102.295	87.1612	108.22	96.5925	97.1535	110.928
ACSL5	6.51947	7.27294	3.23546	5.51546	5.8204	5.04747	19.6309	18.2057	13.416	8.05659	6.04087	5.15784	4.45796	7.42862	4.98162	4.62225	3.90623	3.39138
ACSM1	1.04983	0.982916	0.124537	0.698712	0.149338	0.351499	0.398023	0.598285	0.0460057	0.700664	0.823842	0.122903	0.312933	0.247717	0.0001	0.7112	0.400729	0.109496
ACSM2A	0.221096	0.786353	0.186755	0.0736381	0.149338	0.0320453	0.0001	0.026108	0.0115764	0.311462	1.29872	0.301307	0.0783081	0.0001	0.0001	0.237133	0.300572	0.0001
ACSM2B	0.221096	0.0001	0.186755	0.036869	0.447815	0.0320453	0.0332603	0.0521161	0.0345293	0.700664	1.30999	0.435714	0.19562	0.495334	0.515429	0.0001	0.0001	0.0001
ACSM3	45.8518	36.5715	15.3327	30.092	24.0203	13.4007	22.6895	18.8498	6.93732	52.9829	58.514	24.2282	54.3022	53.9109	26.0522	70.7366	53.1383	23.0486
ACSM5	0.165847	0.196663	0.0623184	0.0001	0.0001	0.0001	0.0664205	0.026108	0.0115764	0.194701	0.0001	0.245707	0.0001	0.0001	0.0001	0.0001	0.0001	0.0001
ACSS1	12.5416	14.7423	12.4438	5.07423	9.10363	9.04064	9.64973	11.1055	9.76647	14.0114	13.8664	13.5085	4.02782	4.45721	5.15339	10.9036	10.6168	6.34508
ACSS2	27.514	24.7671	19.5367	12.6119	12.6854	11.4685	20.7916	16.2031	15.3097	27.2443	22.7903	20.1399	10.6755	10.6476	8.24537	11.6147	10.4165	12.0337
ACSS3	2.32055	0.393227	0.435629	0.77225	0.0001	0.095936	0.165901	0.026108	0.137817	1.40123	0.411971	0.614117	0.391141	0.0001	0.515429	0.414908	0.100257	0.109496
ACTA1	0.607838	0.0001	0.186755	0.331021	0.0001	0.159827	0.0001	0.0781241	0.068959	0.155781	0.13739	0.0001	0.0392041	0.742952	0.0001	0.0001	0.300572	0.0001
ACTA2	3.5131	2.35886	1.74221	2.1327	1.04477	1.94876	1.85534	1.44742	1.62599	2.16967	0.823842	1.35094	1.32964	0.247717	1.37431	0.296391	0.701201	0.437685
ACTA2-AS1	0.133532	0.0001	0.0001	0.0001	0.0001	0.0001	0.0681534	0.0277878	0.0612439	0.0878982	0.0001	0.0001	0.0001	0.0001	0.0001	0.0593583	0.0001	0.0001
ACTB	4192.86	3148.54	3829.03	3837.07	2613.24	3432.19	3841	2774.09	3519.32	3825.81	2722.1	3502.94	3977.3	3245.01	3786.82	3482.58	2838	3593.71
ACTBL2	0.0001	0.196663	0.0001	0.110407	0.0001	0.0320453	0.0001	0.0001	0.0001	0.0001	0.0001	0.0001	0.312933	0.495334	0.171876	0.0001	0.0001	0.109496
ACTBP11	0.553846	0.58979	0.187036	0.551833	0.0001	0.417321	0.431724	0.156393	0.242042	0.546161	0.13739	0.122992	0.548999	0.0001	0.343653	0.189337	1.00319	0.219023
ACTBP12	0.663087	0.58979	0.248984	0.036869	0.447815	0.766906	0.298542	0.156148	0.436217	0.272541	0.274681	0.245707	0.312933	0.0001	0.0001	0.0593583	0.701201	0.547126
ACTBP2	22.4044	8.58699	7.48101	16.1796	6.32334	9.14526	11.4665	8.1504	7.86129	14.0636	8.54841	5.69303	10.5888	5.70226	9.89753	10.2477	12.4197	12.4113
ACTBP7	0.0001	0.0001	0.124537	0.036869	0.0001	0.095936	0.0001	0.0521161	0.0574821	0.0001	0.0001	0.0001	0.0392041	0.0001	0.0001	0.0001	0.300572	0.0001
ACTBP8	0.110598	0.0001	0.124537	0.331021	0.0001	0.0639907	0.0001	0.0521161	0.0230529	0.116861	0.0001	0.122903	0.0783081	0.0001	0.171876	0.177875	0.0001	0.109496
ACTBP9	0.55395	0.196663	0.0623184	0.0001	0.0001	0.127881	0.464344	0.104132	0.0919114	0.155781	0.274681	0.0001	0.156516	0.0001	0.171876	0.0001	0.300572	0.0001
ACTG1	4155.12	3347.28	3434.55	2641.68	2484.21	2905.41	2915.24	2357.68	2742.62	3415.81	2566.25	2992.38	3649.65	2551.7	3244.19	2711.25	2447.85	3107.71
ACTG1P1	0.500688	0.0001	0.0001	0.845788	0.0001	0.0320453	0.0648847	0.0001	0.0001	0.0001	0.0001	0.0001	0.0001	0.0001	0.0001	0.237133	0.100257	0.0001
ACTG1P10	0.0001	0.529935	0.33683	0.000100075	0.160703	0.0646476	0.000104132	0.0001	0.112184	0.3137	0.297792	0.614117	0.0777364	0.0001	0.184957	0.064346	0.0001	0.0001
ACTG1P10	0.0001	0.529935	0.33683	0.000100075	0.160703	0.0646476	0.000104132	0.0001	0.112184	0.3137	0.297792	0.614117	0.0777364	0.0001	0.184957	0.064346	0.0001	0.0001
ACTG1P11	0.816076	0.0001	0.0312092	0.367984	0.0747192	0.0639907	0.221168	0.0595469	0.0919114	0.0519947	0.0001	0.0001	0.277389	0.742952	0.0001	0.0988638	0.525964	0.0001
ACTG1P2	0.272071	0.0001	0.0312092	1.47138	0.0747192	0.0001	0.110634	0.148717	0.0460057	0.259573	0.0001	0.0001	0.231174	0.000100001	0.0001	0.197628	0.175388	0.0001
ACTG1P3	0.0001	0.0001	0.0001	0.0001	0.0001	0.0320453	0.0332603	0.026108	0.0460057	0.0001	0.0001	0.36851	0.0001	0.0001	0.0001	0.0001	0.0001	0.0001
ACTG1P4	0.110598	0.0001	0.0001	0.0001	0.0001	0.016781	0.0916132	0.0414994	0.0001	0.0636985	0.0626748	0.0001	0.00279367	0.0001	0.0001	0.0593583	0.0001	0.0001
ACTG1P9	0.400862	0.393227	0.0001	0.331021	0.298577	0.095936	0.167437	0.182156	0.0345294	0.233621	0.274681	0.122903	0.117412	0.0001	0.171876	0.296391	0.601043	0.109496
ACTG1	4155.12	3347.28	3434.55	2641.68	2484.21	2905.41	2915.24	2357.68	2742.62	3415.81	2566.25	2992.38	3649.65	2551.7	3244.19	2711.25	2447.85	3107.71
ACTL10	0.607838	0.786353	0.435629	0.147176	0.447815	0.287608	0.431184	0.494253	0.734591	0.934185	0.13739	0.36851	0.938598	0.990569	0.0001	0.414908	0.100257	0.765873
ACTL6A	40.7182	38.33	43.1172	31.1199	37.3938	38.2238	36.0151	37.6857	38.8137	33.2379	37.0684	41.876	35.4102	36.1522	39.6804	33.8958	44.2697	42.0648
ACTN1	546.417	471.358	485.294	501.913	372.646	431.067	416.996	368.902	415.299	435.348	354.209	401.68	370.785	310.429	361.075	382.628	329.52	405.76
ACTN2	0.276345	0.58979	0.186755	0.036869	0.298577	0.255663	0.165901	0.494252	0.401775	0.0779404	0.274681	0.122903	0.117412	0.495334	0.343653	0.237133	0.601043	0.328289
ACTN3	0.0001	0.196663	0.0623184	0.036869	0.0001	0.0001	0.0332603	0.0001	0.0345293	0.506063	0.411971	0.0001	0.312933	0.0001	0.343653	0.0593583	0.0001	0.0001
ACTN4	385.949	264.181	290.123	465.558	292.653	377.615	307.512	226.548	257.848	303.498	248.358	271.273	311.772	338.738	293.91	300.483	240.578	266.488
ACTN4P1	2.3758	0.982916	1.12164	1.47123	1.64669	2.17238	1.19428	1.58716	1.29751	1.83077	0.549261	1.10533	1.83799	1.23819	1.03076	1.24528	0.9028	1.31285
ACTR10	46.4645	46.5856	46.4149	34.3423	46.5625	44.9152	47.1541	52.0425	50.4735	55.1112	57.7992	55.8756	57.5614	38.1331	47.4104	59.1399	59.9943	56.1204
ACTR1A	174.531	155.875	157.412	160.935	158.938	174.008	168.852	162.842	172.224	155.484	121.704	138.767	160.526	134.209	146.697	186.127	170.168	177.549
ACTR1B	31.4919	30.0743	24.763	18.2743	20.1473	20.7645	34.2216	31.6778	32.4324	29.4238	23.2022	25.7888	22.876	14.6095	17.006	22.1627	24.3383	23.6297
ACTR2	432.616	538.318	531.073	469.366	534.264	512.211	597.35	601.678	583.093	513.678	584.925	632.653	553.511	539.177	612.91	616.041	644.675	668.134
ACTR3	283.421	268.504	302.625	406.764	395.779	403.105	461.035	451.566	472.674	148.831	140.997	154.487	202.952	208.989	237.052	207.467	233.567	234.982
ACTR3B	4.43834	8.0592	5.59315	3.13103	5.36832	3.73569	3.0788	3.82306	4.70949	4.7784	4.94255	5.03307	4.29521	2.43607	6.01228	4.44156	5.50355	5.79736
ACTR3C	0.755258	0.0001	0.255581	0.251916	0.153704	0.384693	0.171112	0.0523353	0.351732	0.320344	0.0001	0.247673	0.0846517	0.287916	0.0001	0.0622706	0.20561	0.110234
ACTR3P2	0.115089	0.0001	0.0001	0.183945	0.0001	0.162313	0.232222	0.234172	0.149639	0.233759	0.274681	0.0001	0.0392041	0.247717	0.0001	0.118617	0.0001	0.0001
ACTR5	5.35924	7.4695	5.97306	3.27254	3.73106	4.15299	4.21145	6.164	5.68093	6.81114	5.49171	7.61391	5.31825	3.21912	5.8405	7.28887	6.51032	6.67327
ACTR6	14.2543	15.332	16.7369	10.2954	14.327	13.1297	14.6238	13.1862	13.7374	14.167	16.4749	15.4733	14.6641	13.8667	16.8342	11.8518	16.8265	16.7377
ACTR8	37.9009	31.8433	33.8469	32.7614	36.8619	33.2872	35.9125	32.042	33.7753	30.6304	30.3412	33.157	42.4671	35.4094	36.2449	37.4513	35.4557	40.4767
ACTRT3	2.03029	1.96573	2.05331	2.24301	1.9402	2.23627	2.4208	2.72749	2.47901	2.29482	2.8832	2.94738	3.12843	2.22866	2.06142	3.08153	3.00482	3.39138
ACVR1	69.1165	64.8661	54.0678	43.6453	56.7106	46.0976	54.5163	62.0295	49.6468	62.0386	66.3113	56.981	51.265	54.7235	53.5942	64.9469	68.7083	61.2622
ACVR1B	60.1662	47.765	45.0463	49.3073	48.6518	39.7401	61.9105	76.8535	60.389	52.3478	52.5823	40.8936	51.8912	70.3234	48.441	54.6955	57.891	50.7599
ACVR1C	0.0553489	0.196663	0.186755	0.036869	0.0001	0.095936	0.0664205	0.13014	0.0574821	0.116861	0.13739	0.245707	0.0001	0.0001	0.0001	0.0593583	0.200414	0.0001
ACVR2A	13.4439	15.4224	13.1135	8.22286	7.20765	7.38732	9.13617	9.42819	10.1906	18.386	19.0633	16.1854	12.6618	11.8857	11.9735	11.1084	13.9248	13.6909
ACVR2B	10.3316	12.5801	12.0705	7.68483	12.0884	11.7879	9.31814	10.2993	8.52709	23.5857	32.4006	25.7888	29.4846	28.7237	30.061	27.3182	25.1396	21.3324
ACVR2B-AS1	0.884082	0.196663	0.248973	0.514867	0.0001	0.159827	0.265382	0.104132	0.16077	0.778504	0.549261	0.36851	0.625765	0.0001	0.171876	0.474166	0.200414	0.328289
ACVRL1	310.498	286.393	296.909	134.281	143.418	177.935	272.578	266.031	302.687	242.433	216.37	257.027	108.513	114.399	171.089	189.272	228.156	259.596
ACY1	4.47504	2.94851	3.60851	1.61794	2.98474	2.40029	3.28239	3.43151	3.32053	3.88788	1.78479	2.94738	2.65741	1.73342	2.22907	2.07414	2.18478	2.57245
ACYP1	2.3758	1.76917	4.23095	2.53716	1.64172	2.49184	2.81872	2.39284	2.90364	2.28542	2.05945	2.82458	1.72068	2.97151	3.43563	3.08153	2.8045	4.04776
ACYP2	2.54155	4.12793	3.54655	1.91209	2.83563	2.77934	1.95656	1.53457	2.3872	3.93104	3.29507	3.43859	3.20663	3.96198	1.88964	2.60746	2.70435	1.85983
AD000090.2	3.09404	6.29013	3.0488	1.98563	1.79096	1.85293	1.95656	1.97671	2.26096	3.38223	4.66797	3.43859	2.69828	1.23819	1.54609	2.24377	1.80293	2.40682
AD000092.3	1.27293	1.37604	0.808939	0.994143	0.748883	1.02382	0.696985	0.799341	0.656026	0.622823	0.276449	0.36851	0.469349	0.495334	0.690206	0.414908	0.904104	0.218892
AD000671.6	0.426129	0.0001	0.54758	0.204687	1.11611	0.000141752	0.00010005	0.219648	0.34049	0.000350284	0.0001	0.0001	0.0001	0.0001	0.0001	0.000100665	0.0001	0.0001
AD000684.2	0.0001	0.0001	0.0001	0.0001	0.0001	0.095936	0.0001	0.0521161	0.0230529	0.116861	0.0001	0.36851	0.156516	0.0001	0.171876	0.0001	0.0001	0.0001
ADA	14.4753	10.418	11.3861	9.78067	13.5808	16.0367	10.0145	8.37468	9.26159	11.8708	8.37481	7.3683	10.2845	6.19053	8.24537	6.63703	4.80765	4.48534
ADAD2	0.0553489	0.103304	0.0001	0.036869	0.447815	0.095936	0.0995808	0.0595813	0.0115764	0.311462	0.0001	0.245707	0.0392041	0.0001	0.0001	0.0001	0.0001	0.0001
ADAL	3.92277	3.7348	3.42211	1.65471	1.34324	1.62931	2.5866	2.2628	3.14464	2.06287	2.19674	3.43859	1.25143	1.4858	2.06142	1.89637	2.30372	2.29742
ADAM10	255.195	243.346	249.187	248.702	266.69	260.904	330.603	313.583	311.497	316.225	320.71	336.727	325.889	308.531	346.474	358.276	336.828	331.796
ADAM11	0.386842	2.1623	0.808939	0.220714	0.149338	0.383444	0.0995808	0.286188	0.264058	0.817424	0.823842	0.491314	0.117412	0.495334	0.0001	0.296391	0.200414	0.109496
ADAM12	0.939331	0.58979	2.05331	1.13994	1.04477	1.50153	0.829107	0.546269	2.41015	1.32339	1.51029	2.70177	1.13412	0.247717	1.54609	1.00749	1.60262	4.92293
ADAM15	138.841	129.142	83.8081	70.7805	89.8416	74.1133	114.204	85.385	80.2199	172.533	103.105	91.3659	160.133	92.1137	92.0722	191.76	117.785	114.538
ADAM17	94.2149	95.1637	87.1282	147.414	175.393	140.877	128.053	147.406	122.414	141.129	133.601	134.073	166	191.157	170.578	159.83	160.688	156.41
ADAM19	42.2106	49.7306	56.9299	33.5335	31.9371	45.7776	51.6307	57.7898	59.7135	42.4623	48.1891	49.1216	44.4615	40.6093	47.0669	96.8867	97.654	81.6095
ADAM1A	1.65757	3.34168	1.92887	1.21348	1.64172	2.0446	1.79075	3.53719	2.97249	2.99696	4.80526	5.40345	3.20663	4.20959	3.09208	3.25931	4.10655	5.14172
ADAM1B	0.0001	0.393227	0.0001	0.0001	0.0001	0.0001	0.0001	0.0521161	0.080435	0.0001	0.0001	0.0001	0.0001	0.0001	0.0001	0.0001	0.0001	0.109496
ADAM20	0.0001	0.0001	0.186755	0.036869	0.0001	0.0001	0.0332603	0.026108	0.0230529	0.0390202	0.13739	0.122903	0.0392041	0.0001	0.0001	0.0593583	0.200414	0.0001
ADAM20P1	0.0001	0.0001	0.0001	0.0001	0.149338	0.0639906	0.0332603	0.0001	0.080435	0.116861	0.0001	0.0001	0.0001	0.0001	0.0001	0.0001	0.0001	0.0001
ADAM21	0.442091	0.196663	0.435629	0.0736381	0.0001	0.0639907	0.0995808	0.0781241	0.241105	0.0001	0.000100398	0.0001	0.0001	0.0001	0.171876	0.0001	0.100257	0.0001
ADAM22	2.09956	2.55542	2.3644	0.809019	0.89553	1.66126	0.663305	0.624293	0.562445	5.09865	4.11881	4.91223	3.36305	1.4858	3.09208	1.4223	1.70277	1.31285
ADAM23	43.3152	70.1733	69.2493	44.5276	70.5899	65.967	30.574	39.6884	38.963	54.2161	86.2185	99.9617	42.3499	75.771	89.8391	23.7627	34.2538	51.3068
ADAM28	0.0001	0.0001	0.0001	0.147176	0.597053	0.0639907	0.0001	0.104132	0.0460057	0.194701	0.13739	0.0001	0.0392041	0.0001	0.171876	0.0001	0.0001	0.0001
ADAM32	0.386842	1.17948	0.808939	0.625174	0.298577	0.447335	0.298542	0.338204	0.378822	0.895265	0.549261	0.614117	0.743077	0.742952	0.343653	0.177875	0.500886	0.328289
ADAM33	0.110598	0.393227	0.124537	0.0001	0.0001	0.0320453	0.0001	0.0521161	0.0115764	0.0001	0.0001	0.0001	0.0392041	0.495334	0.0001	0.0001	0.0001	0.0001
ADAM8	0.110598	0.0001	0.0623184	0.331021	0.298577	0.0639907	0.132741	0.26018	0.172246	0.194701	0.274681	0.36851	0.0783081	0.247717	0.0001	0.0001	0.0001	0.109496
ADAM9	301.944	215.235	284.898	344.475	212.363	300.836	395.542	278.372	343.241	564.152	471.184	637.349	545.833	425.899	625.459	497.456	419.365	562.057
ADAMTS1	24.0887	23.3911	19.2256	32.835	31.7879	9.67952	19.8631	17.9457	11.4535	51.4916	24.3005	44.0865	165.882	56.4568	67.1646	97.895	58.8925	69.6854
ADAMTS10	10.2764	19.4599	12.3816	5.66253	5.52192	9.74342	6.33371	6.84021	7.81555	12.2989	12.3562	7.73671	3.98871	3.46674	2.57675	4.38521	4.50718	3.50078
ADAMTS10	10.2764	19.4599	12.3816	5.66253	5.52192	9.74342	6.33371	6.84021	7.81555	12.2989	12.3562	7.73671	3.98871	3.46674	2.57675	4.38521	4.50718	3.50078
ADAMTS12	3.37028	3.14511	0.808939	2.0224	5.22344	0.543171	0.530664	1.11845	0.126341	4.67052	5.90358	0.73692	2.58097	2.72389	1.20253	1.60007	2.1034	0.875269
ADAMTS13	1.93381	3.34168	1.49334	1.28702	1.9402	1.18208	0.530664	1.19647	0.711639	2.49099	2.19674	1.10533	1.60337	1.73342	1.88964	0.414908	0.500886	0.328289
ADAMTS13	1.93381	3.34168	1.49334	1.28702	1.9402	1.18208	0.530664	1.19647	0.711639	2.49099	2.19674	1.10533	1.60337	1.73342	1.88964	0.414908	0.500886	0.328289
ADAMTS15	1.32607	0.196663	0.435629	0.0001	0.0001	0.0001	0.0664205	0.026108	0.0115764	1.08987	0.411971	0.73692	0.312933	0.0001	0.0001	0.177875	0.0001	0.0001
ADAMTS16	0.165847	0.0001	0.0001	0.0736381	0.0001	0.0001	0.199062	0.026108	0.0001	0.0779404	0.0001	0.122903	0.0392041	0.0001	0.0001	0.0001	0.0001	0.0001
ADAMTS17	0.0609571	0.393227	0.0001	0.036869	0.149338	0.0001	0.232222	0.312196	0.103388	0.0001	0.0001	0.245707	0.0431735	0.247717	0.515429	0.296391	0.300572	0.656477
ADAMTS18	29.6135	73.7113	97.3097	52.396	138.344	101.81	19.5647	31.0537	19.9691	46.2756	61.2316	89.8921	138.193	118.361	146.524	52.0289	82.9303	84.1258
ADAMTS2	0.165847	0.196663	0.0001	0.0001	0.149338	0.0320453	0.165901	0.0781241	0.0001	0.272541	0.0001	0.0001	0.0392041	0.247717	0.0001	0.0001	0.0001	0.0001
ADAMTS3	3.14929	5.30731	2.11552	1.32379	0.89553	1.50153	3.48193	3.38114	3.27088	4.28132	5.49171	2.70177	3.32395	2.97151	4.63806	5.74815	5.10812	4.70414
ADAMTS4	7.51395	7.4695	6.84412	11.9133	13.1331	13.0977	28.7833	31.4178	28.4387	29.5794	12.2189	23.0871	74.6111	39.1236	53.4226	96.9471	48.7767	73.5144
ADAMTS5	0.0001	0.196663	0.0001	0.110407	0.746292	0.0001	0.0995808	0.104132	0.0460057	0.272541	0.0001	0.0001	1.72068	0.742952	0.171876	0.35565	0.200414	0.0001
ADAMTS6	21.3262	16.1183	18.6656	15.8476	9.99908	15.3977	28.2859	16.2811	26.8782	30.3968	19.2207	31.1922	38.0093	21.5428	38.9934	48.7698	31.149	53.3856
ADAMTS7	37.8868	40.6857	54.8069	26.0288	24.3231	41.4547	28.8823	28.1856	40.4569	40.6233	19.6326	43.7085	33.9337	19.8095	35.9014	54.2677	41.1493	57.4331
ADAMTS7P1	0.39039	0.0001	0.215276	0.0001	0.0001	0.0240216	0.199536	0.00877505	0.0172676	0.325605	0.102718	0.0001	0.134008	0.185182	0.0001	0.178115	0.435932	0.0001
ADAMTS7P3	0.117897	0.0001	0.132058	0.0774106	0.152218	0.170146	0.0001	0.115239	0.146855	0.140119	0.0001	0.255357	0.12582	0.0001	0.0001	0.190621	0.136026	0.0001
ADAMTS7P4	0.169012	0.199702	0.0623184	0.0001	0.298577	0.0320453	0.0001	0.0523592	0.0001	0.049907	0.13739	0.0001	0.101151	0.0001	0.0001	0.0001	0.398222	0.0001
ADAMTS9	19.7753	34.5952	23.0831	32.5368	83.4218	35.044	44.0369	60.026	36.6903	58.1467	73.3081	65.3314	177.729	206.76	167.997	173.388	181.081	161.797
ADAMTS9-AS1	0.998441	0.982916	0.0623184	0.224641	0.450416	0.127881	0.0332603	0.156815	0.0230529	0.739584	0.279763	0.122903	0.783066	0.495334	0.171876	0.713395	0.103673	0.109496
ADAMTS9-AS2	0.276345	0.0001	0.0623184	0.478098	0.447815	0.447335	0.530664	0.442236	0.378822	0.428222	0.13739	0.122903	0.547557	0.742952	0.515429	0.237133	0.100257	0.0001
ADAMTSL1	7.07196	6.68325	8.71068	9.70712	12.8346	12.2991	8.82073	14.6166	15.9982	7.3171	6.72732	6.75429	7.78181	7.92385	10.9938	6.16296	6.91095	9.29877
ADAMTSL4	1.95618	1.76978	1.36397	1.26508	1.61243	1.38678	1.19413	1.8209	0.984979	1.89227	1.86784	1.27786	1.04848	1.48618	0.756234	0.782547	0.461101	0.74423
ADAP1	0.183788	0.58979	0.0623184	0.316622	0.89553	0.766788	1.59175	0.826226	0.866568	0.0779381	1.23571	0.245707	0.179322	0.990569	0.476389	0.533425	0.578088	0.875269
ADAP2	0.331593	0.982916	0.37341	0.0001	0.0001	0.127881	0.165901	0.0781241	0.080435	0.467143	0.686551	0.0001	0.312933	0.0001	0.171876	0.118617	0.100257	0.0001
ADAR	321.708	294.06	308.603	425.887	459.655	460.571	499.595	450.638	456.359	210.52	201.543	204.222	248.774	235.484	243.751	267.256	269.524	241.657
ADARB1	37.7904	27.3224	37.5177	12.6487	10.596	12.6505	14.7233	10.8194	13.3472	31.4086	26.0853	30.0869	16.854	10.6476	15.9753	18.7257	15.224	21.223
ADAT1	17.8455	16.3149	15.9902	11.8765	11.7899	12.2032	16.3481	16.9573	17.6508	18.2148	15.102	17.561	15.3289	9.90479	16.6624	17.5406	16.0253	16.5189
ADAT2	7.01671	12.187	10.9505	2.5004	7.31278	4.28078	5.86947	7.82852	6.7712	7.9009	14.5529	10.3156	5.12273	6.93338	9.79136	6.16296	10.0158	8.20481
ADAT3	1.49182	0.786353	2.05331	0.84054	1.49248	1.0543	1.39283	1.11845	1.40022	1.37939	1.09842	0.73692	1.13412	0.495334	0.515429	1.57513	1.70277	2.29742
ADC	0.442091	0.58979	0.37341	0.036869	0.149338	0.127881	0.762786	0.962397	0.298487	1.01203	0.411971	0.122903	0.0392041	0.0001	0.0001	0.829716	0.400729	0.547081
ADCK1	3.42553	3.14511	2.42662	1.02963	1.49248	1.11819	1.92339	2.34082	1.69861	2.10179	1.64758	1.59654	1.13412	0.495334	0.515429	1.48156	1.30214	0.875269
ADCK2	16.7118	17.1011	13.066	4.59623	9.99907	7.25169	9.55616	9.00115	9.98453	21.9608	11.9444	14.7365	9.22866	5.44768	7.38649	8.57718	8.21299	8.09542
ADCK3	10.0554	10.2214	7.40409	3.93439	5.96963	4.47245	5.0073	4.94162	5.03825	13.8946	13.18	9.21035	5.35736	5.94291	1.71786	4.91854	4.2067	5.5793
ADCK4	8.23219	8.25576	4.91535	2.31655	2.53715	2.81129	3.81353	3.66723	4.17752	6.88898	4.66797	5.03504	2.62007	2.47627	3.09208	3.67412	3.30529	3.71957
ADCK5	2.87304	2.35886	1.99109	1.13994	1.49248	1.18208	1.75759	1.84667	2.00847	2.52991	2.05945	1.47374	1.9553	0.990569	3.26385	2.19266	1.4023	1.09406
ADCK5	2.87304	2.35886	1.99109	1.13994	1.49248	1.18208	1.75759	1.84667	2.00847	2.52991	2.05945	1.47374	1.9553	0.990569	3.26385	2.19266	1.4023	1.09406
ADCY1	0.331593	0.786353	0.248973	0.110407	0.597053	0.319553	0.199062	0.286188	0.218152	0.272541	0.823842	0.122903	0.19562	0.247717	0.171876	0.414908	0.300572	0.437685
ADCY10P1	0.49734	0.58979	0.248973	0.183945	0.298577	0.223717	0.132741	0.26018	0.16077	1.20663	1.09842	0.245707	0.234724	0.247717	0.515429	0.948233	0.100257	0.328289
ADCY2	0.0553489	0.393227	0.0001	0.183945	0.149338	0.0001	0.0332603	0.026108	0.0001	0.0001	0.13739	0.491314	0.156516	0.247717	0.0001	0.0593583	0.100257	0.0001
ADCY3	33.5149	37.1746	34.2617	22.03	30.8043	36.5208	31.1838	35.6906	40.5729	28.6058	24.9459	29.4506	22.8339	23.1444	28.1089	26.4214	27.7862	27.7001
ADCY4	57.1275	61.5244	58.1573	44.7847	32.5341	47.3431	69.7694	52.5104	65.5077	93.9922	85.3948	74.0506	39.5734	36.1522	36.0731	57.1251	49.7782	48.3532
ADCY5	0.165847	0.196663	0.0001	0.0736381	0.0001	0.101351	0.0995808	0.0521161	0.0345293	0.155781	0.0001	0.0001	0.0001	0.0001	0.343653	0.0593583	0.0001	0.0001
ADCY6	48.0667	43.244	51.5792	30.5919	43.2792	49.9308	42.3791	47.6988	48.1665	34.5224	44.894	40.4024	31.8309	26.9904	33.6683	41.3623	44.3698	43.1021
ADCY7	4.53896	5.60837	5.51996	1.68672	3.74896	3.82145	2.88612	5.44469	3.8347	3.67431	4.21938	4.21606	2.82587	2.59071	2.51642	2.10394	4.62997	3.47139
ADCY9	29.7793	24.1774	26.3185	14.7077	15.3716	14.3116	20.5595	15.917	17.2262	29.3459	22.9276	24.0696	17.7142	13.1238	17.5213	17.422	12.6199	14.878
ADD1	341.274	289.538	268.533	290.032	232.214	240.328	238.356	219.169	228.904	269.407	239.983	234.556	211.673	202.799	199.604	226.071	208.627	219.231
ADD2	0.110598	0.196663	0.124537	0.183945	0.298577	0.319553	0.199062	0.364212	0.137817	0.0390202	0.274681	0.0001	0.0392041	0.247717	0.0001	0.0593583	0.0001	0.0001
ADD2	0.110598	0.196663	0.124537	0.183945	0.298577	0.319553	0.199062	0.364212	0.137817	0.0390202	0.274681	0.0001	0.0392041	0.247717	0.0001	0.0593583	0.0001	0.0001
ADD3	61.1606	63.49	70.4936	92.8055	76.8576	106.762	215.647	193.863	196.366	135.208	129.877	138.769	164.783	110.933	148.759	263.578	209.73	215.839
ADH5	71.0257	73.118	66.7221	30.3605	36.3894	36.4506	43.0523	37.6702	42.5602	73.9908	57.3686	62.9433	41.6947	30.6327	32.2483	50.1217	39.1548	48.0818
ADH5P3	0.0553489	0.196663	0.0001	0.0001	0.0001	0.0639907	0.0332603	0.0001	0.0574821	0.0779404	0.274681	0.122903	0.0392041	0.0001	0.0001	0.0001	0.0001	0.0001
ADH5P4	4.93089	2.94855	2.58943	1.84929	0.681687	1.81987	2.20854	1.18219	2.10388	4.47115	2.20694	2.3884	2.25852	1.80535	2.27893	2.38118	1.50246	2.02193
ADHFE1	2.32055	1.96573	2.48883	1.25025	1.49248	0.607063	0.199062	0.650301	0.355869	3.89212	3.15778	1.22813	1.25143	0.247717	1.37431	0.177875	0.500886	0.765873
ADI1	91.3238	99.8499	83.9948	52.9104	76.5595	61.3647	54.8811	50.4548	48.854	105.972	103.374	97.9928	75.3132	70.5709	73.6872	58.8432	60.3951	55.6822
ADIPOQ	0.0001	0.0001	0.0001	0.0001	0.0001	0.0001	0.0001	0.026108	0.0646001	0.0001	0.411971	0.0001	0.0001	0.0001	0.0001	0.0593583	0.0001	0.0001
ADIPOQ-AS1	0.0553489	0.196663	0.0001	0.0001	0.0001	0.0001	0.132741	0.13014	0.107746	0.583903	0.0001	0.245707	0.0783081	0.0001	0.0001	0.177875	0.100257	0.0001
ADIPOR1	74.2545	68.6006	67.6314	71.7372	54.4722	64.306	65.988	60.833	62.7859	68.616	63.9774	71.1033	73.3992	86.666	80.2197	70.8136	68.6076	78.5468
ADIPOR2	67.017	68.9938	72.7334	53.6461	58.5015	52.071	72.2895	67.9591	64.8303	71.1463	69.0571	71.7173	60.1813	57.6949	57.8888	63.1694	71.8128	68.3727
ADIRF	3.70489	3.32523	3.06521	1.43409	3.70823	2.13693	1.52304	2.24758	1.97196	3.58737	3.39381	2.88376	2.91173	2.71155	2.23319	2.64376	3.65028	2.45892
ADIRF-AS1	1.72358	1.19593	0.471982	0.183945	0.321409	0.473087	0.636515	0.366347	0.575992	2.23192	1.44846	1.41456	0.883461	0.507671	0.171876	1.28826	0.854908	2.02652
ADK	14.6963	18.8702	16.3635	11.1043	16.1178	14.663	15.2538	16.3071	18.1848	13.3887	13.5918	15.8417	13.2173	14.6095	20.0979	13.8665	15.9251	18.8162
ADM	26.0776	34.5953	25.3852	21.9144	29.4001	29.4536	14.4248	10.0652	9.50259	42.7345	37.8922	39.2972	54.1591	60.6662	42.2571	41.1254	36.0567	37.523
ADM2	0.939331	0.982916	0.560065	25.6647	30.594	24.0869	43.5727	57.7902	47.1336	2.8802	6.59003	7.73671	13.4519	17.0857	12.8833	8.237	9.8155	6.89206
ADM5	0.939331	1.17948	0.622284	0.307397	0.298577	0.486259	0.431191	0.234172	0.46936	2.03359	0.924071	1.22813	1.16354	1.11214	1.03076	0.474166	1.10183	1.64104
ADNP	116.575	119.511	121.7	95.9665	84.9169	86.4453	92.8168	88.0634	84.1806	127.544	116.285	122.558	120.521	119.846	117.667	122.607	103.963	113.225
ADNP2	32.8179	26.7327	34.9046	32.3568	35.6681	33.6705	32.2982	34.3827	34.4639	24.6366	21.8293	22.5959	33.395	37.6379	33.3247	31.0514	33.2523	28.1149
ADO	22.9284	30.0743	24.203	20.8481	27.7584	22.3618	25.8651	26.2162	25.1794	33.8996	29.9294	32.7886	34.2162	33.676	33.6683	32.1774	35.2555	33.1471
ADORA2A	6.25741	4.19966	3.25316	0.154581	1.94195	0.271318	11.8502	4.79762	1.71852	21.9392	15.661	19.1933	6.46138	1.05314	2.59097	13.4181	5.32003	12.6114
ADORA2A-AS1	0.110598	0.0001	0.0623184	0.0736381	0.149338	0.0639907	0.464344	0.0327557	0.080435	0.725319	0.411971	0.73692	0.0392041	0.247717	0.0001	0.0593583	0.100257	0.328289
ADORA2B	4.86201	6.68325	4.4176	2.13271	1.79096	2.58767	2.91821	2.78296	3.09873	6.85006	4.80526	5.52625	5.20094	5.44768	7.38648	4.74076	3.80608	4.15716
ADORA3	0.0001	0.0001	0.186755	0.0001	0.0001	0.0001	0.0664205	0.104132	0.0345293	0.233621	0.13739	0.0001	0.0392041	0.0001	0.171876	0.118617	0.0001	0.0001
ADPGK	44.8067	57.9835	45.7307	35.2243	45.667	44.6914	44.9655	53.861	50.8279	59.3145	53.2687	57.8394	50.1313	51.0092	55.6557	55.288	59.9941	50.5404
ADPGK-AS1	0.0556378	0.19952	0.0001	0.0742699	0.0001	0.032421	0.0001	0.0276393	0.0819548	0.0001	0.0001	0.124019	0.0001	0.0001	0.0001	0.0001	0.0001	0.110279
ADPRH	13.5913	12.7767	7.16034	11.7662	11.3422	9.9351	24.1739	16.073	16.2049	9.88583	7.27649	5.03504	9.93254	5.94291	7.38649	13.6295	6.20985	5.5793
ADPRHL1	0.331593	0.196663	0.248973	0.257483	0.447815	0.319553	0.199062	0.0781241	0.252581	0.311462	0.274681	0.614117	0.312933	0.0001	0.171876	0.118617	0.200414	0.218892
ADPRHL2	18.7295	12.3836	16.3635	24.4515	29.4001	29.7732	24.0413	22.315	24.6744	18.1758	14.4156	14.2453	18.9656	24.2666	18.0366	16.8295	21.0331	16.7377
ADPRM	6.18798	6.48669	4.54204	4.19177	5.96963	5.20719	5.40522	4.68155	4.82019	3.38616	3.15778	2.82458	3.8714	2.47627	3.6074	3.67412	3.00482	2.735
ADRA2A	0.165847	0.393227	0.0001	0.0001	0.0001	0.0001	0.0664205	0.0001	0.0001	0.272541	0.0001	0.0001	0.469349	0.0001	0.171876	0.7112	0.601043	0.218892
ADRB1	0.165847	0.0001	0.248973	0.110407	0.0001	0.0001	0.132741	0.0001	0.0345293	0.194701	0.0001	0.0001	0.0001	0.0001	0.0001	0.0001	0.0001	0.0001
ADRB2	0.49734	0.786353	1.05781	0.551636	0.746292	0.127881	0.431184	0.650301	0.298487	0.895265	0.411971	1.22813	0.508453	0.742952	1.03076	0.296391	1.20199	0.109496
ADRB3	0.0001	0.0001	0.0001	0.0001	0.0001	0.0001	0.0332603	0.026108	0.0115764	0.0779404	0.0001	0.0001	0.156516	0.0001	0.0001	0.829716	0.100257	0.0001
ADRBK1	50.9395	52.2859	47.7838	25.812	38.9513	33.3829	38.7975	36.8274	36.7474	47.2494	42.1482	44.8233	30.0712	27.4856	26.2819	37.9253	33.2523	31.3969
ADRBK2	5.30399	4.91418	4.16873	5.36838	4.17877	4.63217	7.428	7.30835	6.35804	6.77222	3.56965	3.5614	5.24005	1.73342	5.8405	5.6889	3.30529	3.71957
ADRM1	54.5755	46.5751	42.2457	61.7344	47.9049	46.8277	57.1002	56.0419	59.8444	46.6148	35.5535	39.5386	49.3053	49.5236	42.9387	58.3041	56.474	54.2582
ADSL	54.2545	60.7382	48.2194	37.5045	45.3686	43.6371	48.845	55.7091	50.0608	47.288	49.2873	41.7532	48.4892	41.5998	43.6313	51.5549	65.0021	57.8707
ADSS	135.181	173.959	173.347	147.372	140.088	123.945	108.81	119.264	102.85	96.4165	119.305	123.644	93.7016	108.704	88.4649	70.8675	78.1438	70.3419
ADSSL1	3.31503	1.76917	2.92436	1.17671	0.746292	1.4057	0.596985	0.494253	0.872309	3.15264	4.39339	1.71935	1.52516	0.990569	1.03076	0.592683	1.4023	0.437685
ADTRP	0.99458	2.1623	4.47982	1.25025	2.68639	5.71832	2.61976	4.05736	6.87446	0.700664	1.51029	1.10533	0.391141	1.23819	2.57675	1.30378	1.70277	2.62561
AE000658.25	0.331593	0.0001	0.248973	0.478231	0.149338	0.223717	0.132741	0.338204	0.218152	0.0779986	0.0001	0.0001	0.0001	0.0001	0.171876	0.0001	0.100393	0.218892
AE000658.27	0.276345	0.0001	0.0001	0.0736381	0.0001	0.0001	0.0669261	0.182156	0.085332	0.236681	0.13739	0.0001	0.0392041	0.247717	0.0001	0.118617	0.10233	0.109496
AEBP1	94.1448	75.284	65.8893	78.4288	68.5006	55.2012	81.707	81.4582	71.4537	82.9771	65.7623	65.5772	68.2755	62.152	51.8766	73.2434	60.495	56.2298
AEBP2	32.7627	32.0399	38.3265	42.8362	38.5036	34.7884	40.3228	34.903	33.3162	37.4024	40.0889	40.2796	41.685	43.0855	36.7602	40.9476	41.365	37.4135
AEN	27.6245	29.0914	35.1534	31.9893	47.7564	44.244	32.4975	33.3422	38.4113	27.867	23.0649	27.2625	43.7575	40.6093	44.1467	35.6144	42.667	51.1974
AES	203.149	174.941	162.452	144.209	111.481	113.628	146.469	113.603	133.976	225.775	166.395	183.591	161.188	154.266	153.912	184.233	139.254	177.988
AF001548.5	0.165847	0.393227	0.684502	0.257483	0.149338	0.639007	0.398023	0.208164	0.470634	0.350382	0.549261	0.122903	0.234724	0.0001	0.687206	0.177875	0.100257	0.437685
AF011889.2	0.0726787	0.0001	0.0818931	0.109241	0.447815	0.210272	0.232789	0.110895	0.0533352	0.367379	0.0001	0.385085	0.115866	0.0001	0.0001	0.0675641	0.15527	0.137178
AF011889.2	0.0726787	0.0001	0.0818931	0.109241	0.447815	0.210272	0.232789	0.110895	0.0533352	0.367379	0.0001	0.385085	0.115866	0.0001	0.0001	0.0675641	0.15527	0.137178
AF013593.1	0.165847	0.0001	0.0623184	0.257896	0.0001	0.0640982	0.0665238	0.104132	0.0115764	0.233621	0.0001	0.122903	0.0001	0.0001	0.0001	0.0001	0.0001	0.109496
AF064858.8	0.165847	0.196663	0.0001	0.0001	0.0001	0.0001	0.0664205	0.156148	0.080435	0.350382	0.13739	0.0001	0.0392041	0.247717	0.0001	0.296391	0.300572	0.109496
AF127936.7	2.65205	4.52106	1.99109	2.94162	6.26811	3.76965	3.87985	4.36945	3.71846	2.99696	4.2561	3.43859	3.40215	3.71436	1.88964	4.14818	4.90781	4.04776
AF129075.5	0.331593	0.196663	0.37341	0.183945	0.149338	0.191772	0.0332603	0.208164	0.252581	0.0779404	0.0001	0.122903	0.117412	0.247717	0.171876	0.0593583	0.200414	0.218892
AF131215.2	1.82331	1.96573	1.61778	0.698712	0.597053	1.24597	1.39283	1.9507	1.28546	2.60775	3.84423	3.43859	2.22903	1.23819	3.26385	2.1334	1.50246	2.8444
AF131215.8	0.0553489	0.0001	0.186755	0.0001	0.447815	0.0001	0.0332603	0.026108	0.0345293	0.0001	0.0001	0.0001	0.0392041	0.0001	0.0001	0.118617	0.0001	0.0001
AF131215.9	1.27082	1.17948	1.12003	0.735481	0.447815	0.575116	0.630145	0.728325	0.596874	1.94611	1.23571	1.84215	0.743077	1.23819	0.0001	1.30378	1.10183	0.656477
AF131216.6	0.279308	0.99415	0.314581	0.516349	1.05565	0.5488	0.50328	1.10553	0.63697	0.745777	1.23571	0.122903	0.550769	0.247717	1.2069	0.656225	1.00758	0.221321
AF146191.4	0.165847	0.0001	0.0001	0.0001	0.0001	0.0320453	0.0664205	0.0001	0.0230529	0.0390202	0.0001	0.0001	0.0392041	0.0001	0.0001	0.0593583	0.0001	0.0001
AF146191.4	0.165847	0.0001	0.0001	0.0001	0.0001	0.0320453	0.0664205	0.0001	0.0230529	0.0390202	0.0001	0.0001	0.0392041	0.0001	0.0001	0.0593583	0.0001	0.0001
AF196972.4	0.49734	0.196663	0.560065	0.441329	0.149338	0.415389	0.165901	0.572277	0.344393	0.233621	0.0001	0.73692	0.352037	0.742952	0.171876	0.118617	0.500886	0.547081
AF196972.4	0.49734	0.196663	0.560065	0.441329	0.149338	0.415389	0.165901	0.572277	0.344393	0.233621	0.0001	0.73692	0.352037	0.742952	0.171876	0.118617	0.500886	0.547081
AF207550.1	0.0553489	0.196663	0.0623184	0.110407	0.0001	0.095936	0.0664205	0.0781241	0.080435	0.233621	0.411971	0.0001	0.0392041	0.0001	0.0001	0.177875	0.100257	0.109496
AF213884.2	0.0001	0.0001	0.124537	0.0001	0.0001	0.0001	0.0332603	0.0781241	0.0919114	0.0779404	0.0001	0.0001	0.0001	0.0001	0.0001	0.0001	0.0001	0.0001
AF230666.2	0.296589	0.226232	0.591854	0.302117	0.0001	0.0559809	0.455128	0.225489	0.344571	0.648521	0.524439	0.327025	0.444761	0.357559	1.23061	0.213967	0.514623	0.789953
AFAP1	215.516	166.091	204.763	159.718	171.171	162.63	209.614	200.584	199.217	186.642	167.218	182.116	193.168	194.38	180.535	181.975	167.059	175.794
AFAP1-AS1	0.394955	0.594443	0.189083	0.262321	0.902454	0.482911	0.618138	0.543237	0.557812	0.793154	0.139029	0.618713	0.520588	0.0001	0.173332	0.359699	0.607055	0.441564
AFAP1L1	27.6798	45.9959	26.1318	11.5824	14.327	12.6824	21.3222	22.5231	18.3163	42.1507	54.7789	43.2269	36.406	33.1808	37.4474	64.8879	63.1995	68.7009
AFAP1L2	15.967	7.4695	1.61778	2.50039	1.79096	1.66126	3.11716	0.598285	0.241105	26.6604	12.2189	5.77186	7.11704	5.94291	6.87116	6.87407	1.60262	2.18802
AFF1	223.319	194.205	229.149	179.07	177.593	160.657	156.647	149.159	123.444	213.315	214.86	215.275	132.095	145.351	127.286	127.167	120.19	111.913
AFF2	0.607838	0.982916	0.560065	0.404559	1.04477	0.319553	0.696466	1.58659	0.906738	1.63475	3.29507	0.982527	2.22903	3.71436	2.9203	4.74076	9.81551	5.03232
AFF2	0.607838	0.982916	0.560065	0.404559	1.04477	0.319553	0.696466	1.58659	0.906738	1.63475	3.29507	0.982527	2.22903	3.71436	2.9203	4.74076	9.81551	5.03232
AFF3	0.607838	0.393227	0.622284	5.73607	15.8194	12.4908	3.81353	11.1575	9.96165	0.116861	0.13739	0.614117	1.56426	4.70483	5.49695	1.18527	7.01111	8.533
AFF4	164.144	147.816	187.775	245.506	235.499	230.488	215.144	201.979	185.186	192.85	203.601	204.1	333.957	288.227	311.259	297.714	251.795	273.929
AFG3L1P	5.91173	9.23857	7.65296	6.47145	6.86506	6.61278	7.46116	9.25895	9.2501	8.6793	11.2579	10.4384	9.07224	10.1524	11.1656	8.17775	14.1223	13.1276
AFG3L2	47.9561	56.4988	45.6669	37.9371	39.7851	40.2931	40.9167	43.967	47.9114	50.4353	41.3509	52.2703	47.6748	46.9768	44.4814	43.2735	55.1544	55.0869
AFG3L2P1	0.773585	0.786353	0.0623184	0.147176	0.149338	0.383444	0.298997	0.13014	0.195287	0.311462	0.961132	0.0001	0.156516	0.0001	0.0001	0.0594969	0.200414	0.547081
AFMID	13.7018	14.9389	11.2616	7.35391	8.50669	7.02807	7.06324	6.37207	7.65488	20.0051	22.653	18.5434	9.5806	11.3905	10.3067	9.71846	12.6199	13.5652
AFTPH	29.5031	34.7918	31.4826	34.1218	31.7879	33.4469	29.5126	31.6001	29.5062	33.2379	32.9497	30.2098	29.0154	30.9522	34.3554	28.9775	29.246	30.4122
AGA	12.3206	9.6317	10.2039	8.7879	5.67116	8.14616	7.69328	5.74787	8.20574	10.7421	7.55106	8.96474	8.25105	4.95244	7.38649	7.34813	4.10655	6.67327
AGAP1	19.1162	15.7252	16.7368	16.5094	14.7747	20.4451	10.114	7.43839	9.73212	34.4445	22.3784	27.8765	18.4963	15.8476	15.2882	23.9997	20.1317	22.3169
AGAP1-IT1	0.0553489	0.0001	0.0001	0.0001	0.0001	0.0320453	0.0332603	0.026108	0.0115764	0.116861	0.13739	0.0001	0.0001	0.247717	0.0001	0.0001	0.0001	0.0001
AGAP10	2.36503	3.85124	1.9953	1.78082	1.06041	1.56056	1.15625	3.04141	1.24579	2.093	3.91476	1.42386	2.76281	1.14137	2.42889	2.20637	3.00167	1.49007
AGAP2	0.113801	0.0001	0.126694	0.0001	0.0001	0.0001	0.0001	0.0001	0.0703841	0.0811966	0.28636	0.245707	0.0802181	0.0001	0.0001	0.0001	0.104276	0.0001
AGAP2-AS1	9.66546	6.48669	6.90418	4.96392	7.31278	5.39886	6.69847	6.19001	5.72541	6.61328	4.10713	4.66663	6.21574	6.19053	4.63806	5.92593	4.90379	4.37595
AGAP3	66.2435	83.5395	61.0363	35.2616	39.6975	38.3664	44.6007	54.0966	45.1488	90.0613	90.337	76.9979	60.455	64.3806	51.0177	71.288	68.8081	61.9184
AGAP4	1.24187	4.37979	3.2269	0.608922	1.82018	1.69893	1.02697	1.28943	2.21208	0.926279	2.86365	2.52079	0.785358	2.83338	4.09197	1.52549	2.03427	2.58678
AGAP4	1.24187	4.37979	3.2269	0.608922	1.82018	1.69893	1.02697	1.28943	2.21208	0.926279	2.86365	2.52079	0.785358	2.83338	4.09197	1.52549	2.03427	2.58678
AGAP5	2.11414	2.74713	2.06743	1.23775	1.19701	1.73334	1.38928	2.00698	2.06996	1.75193	1.34279	2.02979	0.681095	1.57006	1.94289	0.941439	3.27271	0.880724
AGAP6	5.67201	4.64639	6.319	6.25416	8.65334	6.94004	5.37016	7.37726	8.48664	7.1081	6.89686	7.32258	5.53812	8.34827	8.76259	7.20444	8.38354	8.17609
AGAP6	5.67201	4.64639	6.319	6.25416	8.65334	6.94004	5.37016	7.37726	8.48664	7.1081	6.89686	7.32258	5.53812	8.34827	8.76259	7.20444	8.38354	8.17609
AGAP7	0.298359	1.10483	1.47907	0.0850509	0.0001	0.912003	0.13203	0.0864407	1.3314	0.31323	0.443093	1.10461	0.134845	0.0001	0.614815	0.41804	0.271391	1.14385
AGAP7	0.298359	1.10483	1.47907	0.0850509	0.0001	0.912003	0.13203	0.0864407	1.3314	0.31323	0.443093	1.10461	0.134845	0.0001	0.614815	0.41804	0.271391	1.14385
AGAP8	3.59376	1.6963	0.587259	2.69411	3.46211	0.945758	2.51274	2.35855	1.12904	3.86897	5.18049	0.920487	2.2354	2.62606	0.000255511	3.61351	2.9608	2.53401
AGAP9	0.000304369	0.0126179	0.0010898	0.923232	1.29342	0.214841	2.47629	0.371748	1.21797	1.99102	1.38696	1.24173	0.669241	2.8323	0.541944	1.89342	0.525845	0.547851
AGAP9	0.000304369	0.0126179	0.0010898	0.923232	1.29342	0.214841	2.47629	0.371748	1.21797	1.99102	1.38696	1.24173	0.669241	2.8323	0.541944	1.89342	0.525845	0.547851
AGBL3	3.03879	5.30731	2.67549	1.36055	1.49248	1.02235	1.42599	2.02873	0.849356	3.6586	3.84423	2.45617	1.40785	1.98104	1.88964	1.4223	1.80293	0.547081
AGBL5	33.6001	25.5602	23.4022	16.8421	13.1313	16.9059	15.6896	11.5829	13.4765	28.5046	17.7164	15.9688	17.4462	14.3727	12.0058	12.3913	8.42629	7.55149
AGER	2.94719	1.67553	2.74746	1.88818	1.95622	2.51875	2.46639	2.54087	2.38486	6.32241	7.25232	4.06598	2.0888	2.81859	3.16154	4.88612	4.67453	4.00451
AGER	2.94719	1.67553	2.74746	1.88818	1.95622	2.51875	2.46639	2.54087	2.38486	6.32241	7.25232	4.06598	2.0888	2.81859	3.16154	4.88612	4.67453	4.00451
AGER	2.94719	1.67553	2.74746	1.88818	1.95622	2.51875	2.46639	2.54087	2.38486	6.32241	7.25232	4.06598	2.0888	2.81859	3.16154	4.88612	4.67453	4.00451
AGER	2.94719	1.67553	2.74746	1.88818	1.95622	2.51875	2.46639	2.54087	2.38486	6.32241	7.25232	4.06598	2.0888	2.81859	3.16154	4.88612	4.67453	4.00451
AGER	2.94719	1.67553	2.74746	1.88818	1.95622	2.51875	2.46639	2.54087	2.38486	6.32241	7.25232	4.06598	2.0888	2.81859	3.16154	4.88612	4.67453	4.00451
AGER	2.94719	1.67553	2.74746	1.88818	1.95622	2.51875	2.46639	2.54087	2.38486	6.32241	7.25232	4.06598	2.0888	2.81859	3.16154	4.88612	4.67453	4.00451
AGER	2.94719	1.67553	2.74746	1.88818	1.95622	2.51875	2.46639	2.54087	2.38486	6.32241	7.25232	4.06598	2.0888	2.81859	3.16154	4.88612	4.67453	4.00451
AGFG1	67.2932	84.5224	78.5818	75.7075	98.4974	87.1473	78.8883	89.3893	86.4982	79.592	91.161	90.6289	95.4529	99.7898	100.489	91.5541	109.973	109.177
AGFG2	16.5748	23.7843	15.5547	4.155	5.8204	4.63218	6.73163	5.61783	5.77274	31.9925	32.6752	27.3853	8.83762	7.181	7.21471	15.5258	13.1207	13.6746
AGGF1	41.1605	49.534	40.442	27.724	18.9534	24.2466	37.4712	34.9549	37.0232	39.9712	39.677	43.1041	28.0768	31.9427	32.2941	40.6513	42.9676	38.2888
AGGF1P1	0.0553489	0.196663	0.0001	0.036869	0.149338	0.0001	0.0001	0.026108	0.0345293	0.0390202	0.0001	0.0001	0.0392041	0.0001	0.0001	0.0001	0.300572	0.0001
AGK	27.0168	28.6983	30.7982	19.8554	19.998	22.1063	28.8482	30.2944	32.5932	23.9749	29.5175	23.4556	20.5689	25.0094	22.6746	24.8886	30.1474	31.3968
AGK	27.0168	28.6983	30.7982	19.8554	19.998	22.1063	28.8482	30.2944	32.5932	23.9749	29.5175	23.4556	20.5689	25.0094	22.6746	24.8886	30.1474	31.3968
AGL	19.2267	25.5533	29.056	20.4805	21.9382	26.6105	26.3293	30.1695	28.0365	22.5738	31.3023	27.9993	16.854	17.5809	19.4108	21.6887	21.8344	20.676
AGMAT	0.552589	0.786353	1.61778	1.02963	0.149338	0.926515	1.09439	1.63861	1.34284	0.389302	0.274681	0.245707	0.625765	0.0001	0.171876	0.237133	1.30214	1.31285
AGMO	0.165847	0.0001	0.435629	0.036869	0.0001	0.223717	0.0332603	0.0521161	0.195199	0.272541	0.274681	0.0001	0.0001	0.0001	0.343653	0.0001	0.100257	0.0001
AGO1	73.4261	67.6178	67.5068	46.6599	48.2041	51.1766	48.9776	50.3516	49.2454	61.0267	62.6046	58.3317	53.3383	51.2569	54.7967	62.814	64.7016	67.7163
AGO2	24.5858	19.0667	23.7675	46.586	40.7423	37.6315	36.5093	34.0707	30.1144	32.0703	25.3988	29.5957	58.7352	46.3046	54.4532	52.1475	39.9628	38.2888
AGO3	33.4809	23.3911	30.8604	40.5932	36.1158	36.4178	27.1583	30.2475	29.2422	36.157	37.2058	40.2796	45.8693	43.8284	55.3121	36.1476	39.9628	38.2888
AGO4	24.0334	33.0227	26.754	22.2454	21.4904	22.6174	28.2195	34.9549	30.6651	37.4024	43.933	35.7359	31.166	29.7142	35.5578	37.8069	34.4542	35.882
AGPAT1	56.0038	52.9925	49.3516	38.1412	35.153	35.937	33.9374	31.29	33.2668	58.8245	47.7196	49.9722	41.8805	39.7863	33.2289	53.3461	32.9396	38.4905
AGPAT1	56.0038	52.9925	49.3516	38.1412	35.153	35.937	33.9374	31.29	33.2668	58.8245	47.7196	49.9722	41.8805	39.7863	33.2289	53.3461	32.9396	38.4905
AGPAT1	56.0038	52.9925	49.3516	38.1412	35.153	35.937	33.9374	31.29	33.2668	58.8245	47.7196	49.9722	41.8805	39.7863	33.2289	53.3461	32.9396	38.4905
AGPAT1	56.0038	52.9925	49.3516	38.1412	35.153	35.937	33.9374	31.29	33.2668	58.8245	47.7196	49.9722	41.8805	39.7863	33.2289	53.3461	32.9396	38.4905
AGPAT1	56.0038	52.9925	49.3516	38.1412	35.153	35.937	33.9374	31.29	33.2668	58.8245	47.7196	49.9722	41.8805	39.7863	33.2289	53.3461	32.9396	38.4905
AGPAT1	56.0038	52.9925	49.3516	38.1412	35.153	35.937	33.9374	31.29	33.2668	58.8245	47.7196	49.9722	41.8805	39.7863	33.2289	53.3461	32.9396	38.4905
AGPAT1	56.0038	52.9925	49.3516	38.1412	35.153	35.937	33.9374	31.29	33.2668	58.8245	47.7196	49.9722	41.8805	39.7863	33.2289	53.3461	32.9396	38.4905
AGPAT2	22.2655	24.5705	18.6034	7.46421	9.25288	10.8935	10.5119	7.95857	9.86983	23.5468	17.5733	15.9645	11.8486	7.92385	10.3067	12.9777	9.31472	10.3927
AGPAT3	96.0786	102.999	92.0829	97.8793	100.587	98.1365	131.946	126.089	123.279	117.032	94.5927	105.979	91.3858	80.7231	79.189	116.028	108.971	106.005
AGPAT4	11.9891	14.7423	11.8838	9.52327	11.4915	14.088	13.6289	15.5009	16.0441	19.1099	20.4564	17.9294	14.1558	10.1524	16.4906	17.6591	17.127	21.3323
AGPAT5	61.1054	84.9152	95.8157	44.3801	68.3511	76.3503	58.2956	70.6905	73.1738	82.2769	105.713	123.417	83.799	79.2375	115.778	88.7687	118.185	122.524
AGPAT6	55.5252	64.0798	63.8361	75.4869	93.7218	94.3989	90.2626	104.397	105.927	69.784	72.6266	80.0679	99.1298	111.428	120.587	114.487	129.303	134.667
AGPAT9	1.65757	3.93137	0.995594	0.661943	3.58182	0.639007	0.961748	1.11845	0.539492	4.70945	6.31545	5.15784	3.51947	3.96198	2.74852	2.25192	2.30372	2.07863
AGPS	84.1994	80.7876	122.073	63.2061	62.531	83.4094	84.9899	71.3921	92.6493	77.3344	84.7082	109.909	77.1524	61.9044	104.268	84.4432	78.924	102.832
AGRN	141.659	139.364	108.385	125.935	173.564	157.683	203.242	175.059	178.868	173.116	136.878	125.997	150.354	106.228	111.998	139.85	120.489	118.804
AGTPBP1	25.5803	26.143	21.8388	19.7083	21.7889	20.7645	21.7865	22.0549	23.7334	29.9298	26.3598	28.4905	29.641	19.3142	27.4843	20.5627	20.9329	21.5511
AGTRAP	13.0941	12.5802	10.2039	7.8319	10.4468	8.91285	14.0269	14.8247	14.4719	10.314	7.1392	7.3683	8.56389	3.46674	5.8405	9.59995	9.21457	9.95515
AHCTF1	53.729	54.4616	53.2094	81.9341	86.1427	64.3793	59.5414	68.899	55.6239	47.195	55.0366	56.0401	84.4909	99.7571	86.395	64.1075	76.3189	62.2035
AHCTF1P1	22.7356	30.0608	24.4392	30.4324	43.5456	29.253	26.3107	32.6889	25.7896	22.3168	24.0428	25.6244	36.3799	49.8037	43.1246	30.4096	34.4553	29.6896
AHCY	94.8616	86.4882	80.2621	61.1106	55.9646	66.4775	68.2759	60.5204	66.2308	61.8438	52.4449	53.7882	44.0312	47.295	41.7418	48.3552	50.6794	58.5261
AHCYL1	125.582	113.81	109.753	145.498	124.166	133.34	132.041	122.786	114.763	104.034	91.0236	98.9799	110.195	114.152	101.692	100.147	96.752	90.6894
AHCYL2	42.2102	36.954	25.8207	28.7902	18.8041	18.784	37.2721	20.6245	20.1182	43.2406	37.2057	28.8589	25.3395	18.819	19.7544	28.5034	19.7311	16.5189
AHDC1	29.2268	30.664	26.0696	37.7251	28.0569	50.2503	33.16	28.5307	37.5632	38.4533	26.2226	29.2273	32.9648	33.9236	27.8279	39.8807	38.761	34.3504
AHI1	14.9173	19.0667	17.5457	13.8988	14.7747	13.4171	12.2694	16.0471	13.462	12.9994	20.5937	17.0698	10.5973	18.3238	11.5091	13.0962	18.1286	13.8934
AHNAK	760.666	578.682	694.295	500.316	481.592	601.179	457.247	410.823	395.731	1003.01	1031.33	1030.69	905.965	530.644	832.257	720.581	386.807	623.23
AHNAK2	125.526	89.4365	138.374	37.2839	32.0864	43.9249	41.5167	28.5829	39.8233	91.3847	74.6861	90.8748	40.6684	21.2952	50.1588	43.1401	26.1412	52.1821
AHR	68.5059	80.0013	88.2878	59.3457	71.6342	56.4438	43.3698	57.7366	52.5142	75.9726	85.1123	102.05	50.8749	55.4664	63.2137	55.0507	58.2919	59.1834
AHRR	1.16033	0.786353	2.67549	0.404559	2.08944	3.51409	1.85708	2.6009	6.69086	1.47907	1.373	4.78943	1.17322	0.990569	5.15339	1.12601	1.80293	5.14172
AHSA1	59.0611	51.1066	58.8586	64.7502	67.3067	56.6392	49.1435	56.0214	52.7344	41.0607	45.9924	49.2442	50.0533	72.3043	56.5145	50.8437	69.9099	59.8398
AHSA2	28.3691	52.8896	34.6031	15.3136	22.9715	17.7634	20.1732	25.1238	20.2152	43.2493	70.0148	42.4212	20.0823	24.8344	21.2847	25.2353	30.0911	25.1521
AIDA	92.9644	89.1359	86.538	117.63	114.392	112.987	106.21	99.2727	100.449	63.6241	63.6888	57.4456	72.3918	59.5233	69.0929	73.6138	66.6779	64.3525
AIF1	0.110598	0.0001	0.0001	0.0001	0.0001	0.0001	0.0001	0.026108	0.0230529	0.155781	0.13739	0.0001	0.0392041	0.0001	0.0001	0.0001	0.0001	0.0001
AIF1L	57.8457	47.9615	25.5718	27.1356	19.6996	13.8324	14.9554	14.3565	7.84999	84.8855	60.2707	42.4902	62.2931	45.8092	36.4167	61.2731	36.4573	31.6156
AIF1	0.110598	0.0001	0.0001	0.0001	0.0001	0.0001	0.0001	0.026108	0.0230529	0.155781	0.13739	0.0001	0.0392041	0.0001	0.0001	0.0001	0.0001	0.0001
AIF1	0.110598	0.0001	0.0001	0.0001	0.0001	0.0001	0.0001	0.026108	0.0230529	0.155781	0.13739	0.0001	0.0392041	0.0001	0.0001	0.0001	0.0001	0.0001
AIF1	0.110598	0.0001	0.0001	0.0001	0.0001	0.0001	0.0001	0.026108	0.0230529	0.155781	0.13739	0.0001	0.0392041	0.0001	0.0001	0.0001	0.0001	0.0001
AIF1	0.110598	0.0001	0.0001	0.0001	0.0001	0.0001	0.0001	0.026108	0.0230529	0.155781	0.13739	0.0001	0.0392041	0.0001	0.0001	0.0001	0.0001	0.0001
AIF1	0.110598	0.0001	0.0001	0.0001	0.0001	0.0001	0.0001	0.026108	0.0230529	0.155781	0.13739	0.0001	0.0392041	0.0001	0.0001	0.0001	0.0001	0.0001
AIFM1	22.0997	26.3396	23.7053	15.5167	14.6255	15.7172	16.5471	17.8936	19.5215	20.4721	18.6716	20.2627	12.5525	14.3619	14.6011	18.8442	16.4259	18.1599
AIFM2	5.91173	2.35886	3.29767	3.78731	3.73106	2.97102	5.53786	5.14969	5.10712	4.39808	3.70694	4.42102	3.24574	2.22865	2.23319	3.43708	3.80608	2.8444
AIFM3	0.0001	0.0001	0.0623184	0.0001	0.0001	0.0001	0.0332603	0.026108	0.0574821	0.155781	0.0001	0.0001	0.0001	0.0001	0.171876	0.0593583	0.0001	0.109496
AIG1	14.0333	14.9389	11.075	9.56005	11.193	9.5837	9.6829	9.44102	9.04351	13.6222	12.9054	11.298	12.6307	8.41909	9.10425	6.63703	5.90938	4.70413
AIM1	29.1163	21.4255	36.4601	55.2271	41.0407	88.202	60.2851	35.6312	60.6985	76.4004	51.6212	108.681	49.3492	41.5998	77.1278	44.2661	29.3462	72.0923
AIM2	0.0001	0.0001	0.0001	0.036869	0.0001	0.0320453	0.199062	0.026108	0.0460057	0.0779404	0.0001	0.245707	0.0783081	0.0001	0.0001	0.296391	0.0001	0.218892
AIMP1	30.9792	32.4682	31.0967	31.4905	31.5847	33.1384	32.6564	38.0982	36.9505	27.6113	26.3795	34.8279	29.4509	38.8843	34.3557	26.0458	42.1259	38.6315
AIMP2	13.7899	15.8533	15.3592	17.7051	15.4869	18.7532	19.1351	22.4645	22.5085	14.7315	13.3012	16.9888	26.3771	22.5878	16.3235	17.2778	24.1765	19.0824
AIP	21.6577	18.0839	17.6701	12.428	11.9392	12.906	16.9118	14.8507	14.3685	18.2537	11.5325	15.1049	12.5525	11.8857	12.7116	16.2961	15.224	19.582
AIRE	0.0001	0.0001	0.0623184	0.183945	0.149338	0.511225	0.530664	0.754333	0.585398	0.194701	0.686551	0.0001	0.312933	0.247717	0.687206	0.414908	0.400729	0.109496
AJ271736.10	1.54435	0.000106979	0.233721	0.838741	0.353727	0.491769	1.99013	0.828434	0.970199	0.519737	0.00747621	0.722765	1.20074	0.237581	0.0316046	0.170855	0.180035	1.61237
AJAP1	0.386842	0.196663	0.0623184	0.845788	0.149338	0.351499	0.729626	0.208164	0.264058	0.155781	0.0001	0.0001	0.0783081	0.495334	0.171876	0.0001	0.200414	0.0001
AJUBA	46.354	37.9368	44.673	28.0916	19.1026	38.2384	47.0873	24.7597	40.6847	52.1919	45.8551	50.7178	27.4903	18.819	32.8094	27.7923	18.3289	26.6928
AK1	36.4039	44.9492	26.0431	20.1756	18.1356	20.2502	24.0351	14.6037	19.5078	29.2409	23.432	21.0767	18.3898	15.3788	10.6111	22.7763	19.1362	12.3826
AK2	89.7826	90.7781	91.9106	78.1036	84.1734	76.0683	72.7877	85.0486	84.0031	50.1541	51.6957	52.2946	49.3658	63.2495	58.0939	52.8474	75.9472	73.9975
AK2P2	0.110598	0.0001	0.311192	0.404559	0.0001	0.287608	0.199062	0.0781241	0.260076	0.0390202	0.13739	0.122903	0.0831596	0.247717	0.343653	0.0710006	0.0001	0.218892
AK3	93.2058	94.7433	87.1057	80.9656	75.5146	73.5063	84.9563	70.4826	67.1048	111.196	96.2401	84.3662	112.934	90.1327	94.8208	96.2952	80.1258	75.0457
AK3P3	0.0001	0.196663	0.124537	0.147176	0.0001	0.127881	0.0664205	0.13014	0.0689586	0.0390202	0.0001	0.0001	0.234724	0.0001	0.0001	0.0593583	0.0001	0.218892
AK4	27.4456	17.5621	19.5071	37.0051	30.9016	27.1481	60.7848	53.637	46.9035	33.2089	15.0453	19.2714	41.571	18.6378	23.89	26.0735	20.9656	24.4162
AK4P1	2.59769	2.09441	1.95846	3.46247	1.48331	2.55507	4.69184	4.97543	3.6614	2.24482	2.10971	1.9602	4.06357	1.37645	3.07236	1.77399	3.06528	1.94854
AK5	1.87856	1.76917	4.91535	1.28702	0.149338	1.91682	0.199062	0.13014	0.355869	0.428222	0.411971	0.982527	0.156516	0.0001	1.88964	0.0593583	0.300572	0.0001
AK7	0.663087	0.0001	0.124537	0.294252	0.447815	0.159827	0.165901	0.208164	0.137817	0.389302	0.411971	0.0001	0.0392041	0.247717	0.0001	0.237133	0.500886	0.0001
AK8	0.110598	0.393227	0.124537	0.147176	0.0001	0.0320453	0.0332603	0.0521161	0.0460057	0.0001	0.274681	0.0001	0.0783081	0.0001	0.171876	0.118617	0.0001	0.218892
AK9	3.59128	4.91418	4.47982	2.94162	2.23868	2.0446	3.08401	2.57489	2.26096	4.47593	4.53068	2.94738	2.62007	1.23819	2.40497	1.71859	1.90309	1.53165
AKAP1	25.2488	29.8777	23.5809	14.2298	15.2224	13.3533	16.9118	21.7429	20.4626	29.9298	26.2225	28.4905	23.5798	28.9713	20.6133	20.4442	23.8375	26.2552
AKAP10	19.282	25.9465	24.6386	12.9428	14.6255	17.2506	18.2051	18.8819	21.1971	22.4181	22.9276	20.017	15.6417	17.0857	19.0673	21.6294	20.6325	21.6605
AKAP11	61.6579	74.4976	76.7776	44.9319	46.7117	45.4264	56.9031	48.323	50.8063	74.0653	91.4354	86.2081	74.8062	54.2283	74.5511	67.5546	60.2948	62.1371
AKAP12	295.856	210.715	204.2	421.949	178.488	206.97	403.95	238.385	255.317	511.056	359.286	495.385	1551.57	962.998	1493.75	1407.99	850.162	1408.47
AKAP13	76.0741	56.4138	73.7125	66.8095	49.995	65.5819	66.5847	66.0552	60.6636	103.961	89.5925	104.997	111.549	79.7328	121.446	138.477	97.2486	101.848
AKAP17A	32.5968	44.4234	41.4997	57.323	70.8883	60.153	32.6631	44.9158	44.3908	43.3961	49.4246	43.5953	49.2711	63.6377	59.0911	41.8364	45.6718	55.6827
AKAP2	325.117	278.069	308.223	567.017	519.908	502.082	445.395	409.714	382.139	381.312	309.603	381.494	391.885	431.992	419.109	394.129	288.746	383.735
AKAP3	0.828834	0.196663	0.808939	0.0736381	0.0001	0.319553	0.331703	0.572277	0.631303	0.428222	1.09842	0.491314	0.117412	0.742952	0.687206	0.118617	0.300572	0.328289
AKAP5	2.4863	2.55542	2.48883	1.21348	0.89553	1.27791	3.05084	1.6126	1.74452	5.72137	3.56965	5.89466	1.64247	2.22866	2.9203	3.5556	0.901515	2.40682
AKAP6	0.165847	0.0001	0.186755	0.147176	0.0001	0.223717	0.0995808	0.234172	0.149294	0.428222	0.274681	0.491314	0.0001	0.0001	0.687206	0.0593583	0.200414	0.218892
AKAP7	3.59128	3.34168	3.17324	2.64747	2.98487	2.42795	2.32132	1.92469	3.19055	3.464	3.15778	4.29822	2.30724	2.47627	1.88964	2.90376	0.701201	0.984666
AKAP8	25.9118	27.9121	27.4384	29.4522	26.2661	26.323	25.1687	26.4763	26.7859	27.828	26.0853	35.3674	32.0265	35.9046	30.2328	30.6366	36.4573	37.4136
AKAP8L	38.1705	43.0475	37.191	27.5061	26.1168	26.0569	25.4526	28.4738	28.6826	49.5071	44.4362	44.4357	27.0153	40.8261	32.6247	38.7421	31.986	37.2588
AKAP9	62.2104	59.5588	77.0888	80.4135	51.0396	71.3337	58.9923	45.3843	50.5421	66.6708	75.2351	76.8748	72.1471	69.3329	91.3852	69.3319	55.387	61.8089
AKIP1	12.9283	8.45232	11.7594	12.6119	13.4316	12.7782	17.973	18.3097	15.5507	11.1313	8.78668	8.71914	8.05554	6.93338	8.58892	13.3332	15.224	10.8303
AKIRIN1	58.9507	61.1313	62.8404	74.8617	88.0508	69.0977	76.6665	75.528	70.4755	84.378	73.8624	89.7695	108.75	103.504	100.145	105.361	103.462	99.0033
AKIRIN2	24.3649	26.5361	26.8162	32.173	30.594	26.93	26.4288	27.4906	27.3714	24.4031	23.4767	21.3679	28.3897	28.9713	28.6868	21.3331	23.0363	26.474
AKNA	20.4422	22.8014	18.4789	11.5088	12.6854	12.7463	17.1439	17.6856	18.8672	20.55	17.7105	23.7012	15.2507	18.0762	13.7422	22.8146	19.6309	22.4263
AKNAD1	0.0553489	0.58979	0.0001	0.036869	0.0001	0.0001	0.0332603	0.0001	0.0001	0.116861	0.0001	0.0001	0.0001	0.0001	0.0001	0.0001	0.100257	0.0001
AKR1A1	43.3704	41.6715	38.0156	32.9452	44.0254	44.3403	52.0617	57.8679	55.0524	17.8645	20.0445	22.3503	18.379	15.6	25.5948	23.7627	30.2476	28.5525
AKR1B1	42.2103	41.0818	43.9264	21.5836	33.5787	40.0916	32.9283	37.8677	39.0079	27.9837	22.1038	28.3677	20.2951	13.619	19.4108	24.5923	17.5276	22.2075
AKR1B10	0.110598	0.0001	0.0001	0.0001	0.0001	0.0001	0.0001	0.0521161	0.0574821	0.116861	0.0001	0.0001	0.0001	0.0001	0.0001	0.0001	0.0001	0.0001
AKR1B1P2	0.276345	0.0001	0.0623184	0.0001	0.149338	0.0320453	0.165901	0.0521161	0.0230529	0.0001	0.0001	0.0001	0.0001	0.0001	0.0001	0.118617	0.100257	0.0001
AKR1B1P7	0.0553489	0.0001	0.0001	0.036869	0.0001	0.0001	0.0664205	0.026108	0.0348216	0.0390202	0.13739	0.0001	0.0783081	0.0001	0.0001	0.0001	0.100257	0.0001
AKR1C1	0.49734	2.31702	5.656	1.01532	0.902609	5.92171	0.500401	2.4659	2.78372	0.172848	1.14581	2.58885	0.347793	0.775376	2.1061	0.0593583	1.88886	1.76241
AKR1C1	0.49734	2.31702	5.656	1.01532	0.902609	5.92171	0.500401	2.4659	2.78372	0.172848	1.14581	2.58885	0.347793	0.775376	2.1061	0.0593583	1.88886	1.76241
AKR1C2	0.669349	1.02476	1.10338	0.532177	2.38083	1.10491	0.328805	1.16545	0.618637	0.337081	0.776454	0.72704	0.317176	0.46291	0.986079	0.18177	0.0143263	0.53511
AKR1C2	0.669349	1.02476	1.10338	0.532177	2.38083	1.10491	0.328805	1.16545	0.618637	0.337081	0.776454	0.72704	0.317176	0.46291	0.986079	0.18177	0.0143263	0.53511
AKR1C3	7.78393	10.2214	10.8487	4.07847	6.56659	5.87959	2.55344	3.36511	3.15098	3.34347	4.66797	5.64906	1.83799	3.21912	4.12273	2.60357	1.30214	2.07863
AKR1C3	7.78393	10.2214	10.8487	4.07847	6.56659	5.87959	2.55344	3.36511	3.15098	3.34347	4.66797	5.64906	1.83799	3.21912	4.12273	2.60357	1.30214	2.07863
AKR1E2	1.65757	0.58979	0.684502	0.735481	0.298577	0.734843	0.497504	0.572277	0.791974	1.08987	0.961132	1.47374	0.899494	0.0001	1.03076	0.533425	0.801358	0.547081
AKR7A2	21.1051	18.2805	18.7901	11.8029	13.73	12.1713	11.0757	10.8455	13.0832	20.4721	17.5733	18.789	14.3513	10.8953	12.7116	12.5628	9.71536	13.0182
AKR7A2P1	0.110598	0.58979	0.0001	0.0001	0.597053	0.0320453	0.0664205	0.104132	0.0574821	0.0390202	0.13739	0.0001	0.0392041	0.0001	0.0001	0.0001	0.200414	0.218892
AKR7A3	0.0553489	0.0001	0.0623184	0.0001	0.0001	0.0639907	0.0664205	0.0521161	0.100645	0.194701	0.549261	0.36851	0.0783081	0.0001	0.0001	0.0001	0.0001	0.218892
AKR7L	0.0001	0.0001	0.0623184	0.0001	0.0001	0.0320453	0.0332603	0.026108	0.0717018	0.194701	0.13739	0.0001	0.0001	0.0001	0.0001	0.0001	0.0001	0.0001
AKT1	147.017	128.749	130.037	105.711	92.8263	107.911	132.21	109.051	126.201	147.274	110.656	133.487	134.088	103.232	114.403	165.568	126.198	148.123
AKT1S1	59.5192	59.5995	48.7476	63.907	45.5178	50.3956	53.2623	48.1132	53.2707	35.8116	30.6158	29.2273	35.0687	37.7054	30.4347	38.2853	43.0194	37.8512
AKT2	24.9726	32.0399	24.2653	24.0103	26.863	25.6202	28.4516	29.8313	30.5962	29.2681	32.5379	28.1221	31.1269	34.4189	30.2327	28.9181	37.2586	35.7726
AKT3	109.394	121.083	115.976	164.693	184.46	168.514	123.425	134.671	110.651	108.237	145.666	113.225	126.617	135.199	115.777	106.192	113.479	96.3777
AKTIP	19.9822	20.0797	20.2058	13.3786	14.8648	16.084	16.5861	18.5673	20.0567	21.8066	24.2488	21.1382	16.6664	19.6548	13.3934	20.0413	24.684	20.514
AL009178.1	1.16033	0.0001	0.219016	0.0001	0.0001	0.0001	0.0001	0.0781241	0.0115764	5.58105	1.373	0.859724	2.22903	0.495334	0.0001	4.62225	1.20199	0.437685
AL020996.1	0.12248	0.786353	0.0001	0.130218	0.0001	0.159827	0.166178	0.153454	0.0859309	0.426008	0.549261	0.135027	0.19085	0.0001	0.0001	0.118617	0.200414	0.109496
AL021068.1	0.386842	0.58979	0.0623184	0.294252	0.447815	0.383444	0.464344	0.364212	0.447681	0.272541	0.0001	0.982527	0.312933	0.0001	0.171876	0.35565	0.200414	0.328289
AL022476.2	0.141994	0.0001	0.0692508	0.0001	0.0001	0.0001	0.0365134	0.115617	0.220894	0.132986	0.0001	0.16075	0.13544	0.651202	0.497914	0.299816	0.222053	0.0001
AL031663.2	0.0001	0.196663	0.0623184	0.036869	0.0001	0.095936	0.0664205	0.104132	0.080435	0.0779404	0.13739	0.122903	0.0392041	0.495334	0.0001	0.0593583	0.100257	0.0001
AL031666.2	0.165847	0.0001	0.0001	0.0736381	0.149338	0.0639907	0.331703	0.26018	0.0689586	0.0779404	0.0001	0.122903	0.117412	0.0001	0.171876	0.177875	0.0001	0.109496
AL034548.1	13.6158	11.3774	16.6324	19.8191	7.0843	13.104	10.2271	16.3183	11.3087	20.5386	31.4835	28.4922	21.1027	38.0127	28.9578	15.2619	23.2379	27.7532
AL049840.1	1.23556	1.05891	0.775697	0.147176	0.209915	0.397213	0.563792	0.361216	0.349388	1.02969	1.28249	1.3285	0.244031	0.990569	0.343653	0.524553	0.800916	0.486988
AL117190.2	0.118044	0.0001	0.0001	0.0376959	0.0001	0.0001	0.0683749	0.0265938	0.0119235	0.282756	0.292553	0.0001	0.197284	0.0001	0.0001	0.243781	0.0001	0.11125
AL117190.3	0.110598	0.0001	0.186755	0.0736381	0.0001	0.383444	0.0664205	0.0781241	0.114864	0.350382	1.09842	0.122903	0.234724	0.495334	0.171876	0.118617	0.0001	0.218892
AL118506.1	0.0553489	0.0001	0.0623184	0.036869	0.0001	0.0320453	0.0001	0.0521161	0.0345293	0.116861	0.274681	0.0001	0.0392041	0.0001	0.0001	0.296391	0.100257	0.0001
AL121761.2	0.361429	0.273957	0.0001	0.0001	0.149338	0.0958781	0.0664205	0.13014	0.0648415	0.136853	0.274681	0.245707	0.0392041	0.0001	0.0001	0.177875	0.0001	0.00010007
AL132709.1	1.32607	0.393227	0.435629	0.220714	0.0001	0.191772	0.0001	0.13014	0.126341	2.02395	2.74591	0.982527	0.234724	1.98104	0.343653	0.0593583	0.100257	0.0001
AL132709.5	2.04431	0.196663	0.622284	1.87532	0.597053	1.08624	1.29335	0.780341	0.998549	1.75151	0.274681	0.859724	1.48605	0.990569	0.687206	2.1334	1.4023	0.656477
AL132709.8	0.442091	0.58979	0.186755	0.294252	0.298577	0.415389	0.265382	0.234172	0.332916	0.700664	0.549261	0.0001	0.547557	0.990569	0.0001	0.35565	0.500886	0.218892
AL132989.1	0.110598	0.0001	0.311192	0.183945	0.0001	0.191772	0.165901	0.208164	0.195199	0.272541	0.411971	0.0001	0.117412	0.0001	0.0001	0.0593583	0.0001	0.547081
AL133458.1	0.165847	0.393227	0.124537	0.0001	0.0001	0.0639907	0.0001	0.026108	0.0345293	0.194701	0.0001	0.245707	0.0001	0.0001	0.0001	0.118617	0.0001	0.0001
AL136115.1	0.331593	0.0001	0.248973	0.257483	0.0001	0.191772	0.265382	0.182156	0.206676	0.233621	0.13739	0.491314	0.234724	0.0001	0.171876	0.296391	0.200414	0.218892
AL136376.1	0.298724	0.413103	0.127699	0.0762018	0.0001	0.101209	0.103861	0.0813795	0.179633	0.342556	0.142492	0.127079	0.208111	0.503827	0.177887	0.123932	0.322215	0.113908
AL136419.6	2.33431	5.3816	1.78412	0.655742	0.873307	1.64479	0.743692	1.89081	0.954453	1.96805	1.91952	4.01958	1.73877	1.0354	1.05499	1.30976	1.59789	1.40735
AL137059.1	0.0553489	0.0001	0.0001	0.110407	0.149338	0.0320453	0.0001	0.026108	0.0230529	0.0001	0.0001	0.0001	0.0783081	0.0001	0.0001	0.0001	0.0001	0.109496
AL139099.1	0.543049	0.20494	0.456536	0.154676	0.0001	0.368255	0.337386	0.188343	0.166363	0.276448	0.565522	0.0001	0.206791	0.0001	0.182866	0.796136	0.323949	0.0001
AL139147.1	0.442091	0.0001	0.186755	0.220714	0.0001	0.191772	0.398023	0.26018	0.332916	0.0779404	0.0001	0.122903	0.0783081	1.23819	0.0001	0.177875	0.500886	0.109496
AL139385.1	0.00156393	0.735698	0.0639585	0.0722528	0.632607	0.00125708	0.000104503	0.0444413	0.00236395	0.00546139	0.00334329	0.000104555	0.000225603	0.0001	0.00010004	0.0040938	0.0135395	0.00195398
AL139396.1	0.527548	0.0001	0.018631	0.102075	0.136788	0.046585	0.0001	0.0695029	0.0223672	0.000118363	0.114279	0.0001	0.0001	0.0001	0.500983	0.0454179	0.0001	0.0001
AL161915.1	1.38132	0.982916	0.871157	0.183945	0.298577	0.287608	0.331703	0.494253	0.401775	1.28447	1.23571	0.491314	0.19562	0.247717	0.0001	0.296391	0.500886	0.875269
AL162151.3	1.21277	0.0001	0.258334	0.617917	0.309445	0.44222	0.390445	0.583407	0.19147	0.426485	0.428664	0.511303	0.0412679	0.0001	0.178259	0.125804	0.326461	0.0001
AL162415.2	0.132185	0.0001	0.0208395	0.0930435	0.0498461	0.0746232	0.0222068	0.0644672	0.0604291	0.0397717	0.0458634	0.0819689	0.0131347	0.0001	0.0001	0.0396055	0.213259	0.0730308
AL163636.6	4.03135	5.53224	3.38175	1.56464	3.22458	0.233294	1.37588	0.543484	1.2485	1.6846	0.158706	1.05979	1.0288	0.896484	0.014552	1.97267	0.0734307	0.0186909
AL353791.1	6.22164	13.5847	7.92506	2.51129	3.38417	4.24258	3.09345	4.66957	4.06388	7.85387	14.8084	11.5136	5.10226	4.86835	6.05082	5.07151	12.0586	10.5297
AL353898.2	0.0001	0.0001	0.0623184	0.0736381	0.0001	0.095936	0.0001	0.0521161	0.0115764	0.155781	0.0001	0.0001	0.0001	0.0001	0.0001	0.0001	0.0001	0.109496
AL356356.1	0.530217	1.17887	0.81387	0.242651	1.07406	0.49819	0.497248	0.468004	0.392392	1.26047	1.15274	1.17841	0.750512	0.74257	0.618178	0.462077	0.540671	0.459328
AL357673.1	4.47526	4.91418	4.60426	2.31655	1.9402	1.66126	1.55863	1.69062	1.95109	3.50292	4.53068	4.42102	0.821285	1.23819	0.171876	1.12601	1.60262	1.31285
AL359091.2	0.0001	0.0001	0.0623184	0.0001	0.149338	0.095936	0.0001	0.0781241	0.0460057	0.0779404	0.0001	0.0001	0.0001	0.0001	0.0001	0.0001	0.100257	0.109496
AL390877.1	0.409293	0.0001	0.126871	0.531446	0.0001	0.067114	0.136592	0.243612	0.0238448	0.16157	0.0001	0.0001	0.0805493	0.0001	0.0001	0.0001	0.0001	0.111596
AL441883.1	1.00784	0.206839	0.48013	0.236591	0.9665	0.460351	0.532517	0.733811	0.678538	0.409921	0.58927	0.537684	0.97811	1.06491	1.27803	0.583433	0.444876	1.56865
AL450992.2	0.607838	0.393227	0.497847	0.110407	0.447815	0.095936	0.364863	0.182156	0.298487	0.778504	1.51029	0.491314	0.312933	0.0001	0.0001	0.177875	0.100257	0.109496
AL512652.1	0.0001	0.196663	0.248973	0.0001	0.0001	0.0639907	0.0995808	0.0521161	0.103388	0.272541	0.0001	0.614117	0.156516	0.247717	0.171876	0.296391	0.200414	0.109496
AL513477.1	0.00010061	0.0001	0.302762	0.223679	0.27234	0.0732336	0.160892	0.344761	0.0311472	0.000100968	0.417507	0.0747724	0.2141	0.0001	0.209002	0.180264	0.222062	0.080913
AL589642.1	1.11893	0.59971	0.935168	0.839474	0.839613	0.776119	0.757362	0.817674	0.700377	0.788094	1.6526	0.862444	1.16887	0.990569	1.40782	1.22752	1.31622	0.996064
AL589743.1	0.0001	0.0001	0.0001	0.0559676	0.0001	0.0001	0.0332603	0.0001	0.0182547	0.0390202	0.0001	0.122903	0.0001	0.0001	0.0001	0.0001	0.300572	0.109496
AL590762.11	0.607838	0.0001	0.0623184	0.331021	0.0001	0.095936	0.165901	0.139244	0.103489	0.116861	0.411971	0.245707	0.19562	0.0001	0.171876	0.414908	0.0001	0.328289
AL590762.6	0.221096	0.0001	0.124537	0.294252	0.298577	0.127881	0.165901	0.234172	0.103388	0.0390202	0.13739	0.245707	0.117412	0.0001	0.171876	0.118617	0.0001	0.0001
AL590812.1	0.198727	0.196663	0.0001	0.223354	0.119557	0.381303	0.0830007	0.0001	0.0432597	0.0778121	0.0082662	0.000100051	0.000100254	0.0001	0.0001	0.0889874	0.0001	0.169112
AL590822.1	0.516556	0.393227	0.0001	0.110407	0.0001	0.095936	0.165901	0.442236	0.221132	0.226084	0.549261	0.142708	0.0001	0.0001	0.0001	0.0593583	0.100257	0.0001
AL591479.1	1.32607	0.982916	0.808939	0.551636	1.04477	0.766788	0.994908	0.702317	1.03298	1.47907	0.274681	1.47374	1.01681	0.742952	1.35713	1.24452	1.4023	0.983493
AL591704.5	0.122152	0.0001	0.0623184	0.0736381	0.0001	0.0320453	0.0001	0.026108	0.0230529	0.233621	0.274681	0.122903	0.0392041	0.0001	0.0001	0.0001	0.0001	0.0001
AL592284.1	0.081554	0.581474	0.0001	0.0859489	0.298577	0.338499	0.37287	0.240787	0.398787	0.140727	0.0001	0.0001	0.0783081	0.0001	0.0001	0.0001	0.0001	0.217588
AL592494.5	0.442091	0.0001	0.248973	0.257483	0.0001	0.255663	0.0664205	0.312196	0.355869	0.428222	0.274681	0.614117	0.469349	0.247717	0.0001	0.296391	0.100257	0.218892
AL592494.5	0.442091	0.0001	0.248973	0.257483	0.0001	0.255663	0.0664205	0.312196	0.355869	0.428222	0.274681	0.614117	0.469349	0.247717	0.0001	0.296391	0.100257	0.218892
AL627171.2	0.0001	0.58979	0.0001	0.0001	0.0001	0.0639907	0.132741	0.0001	0.0460057	0.0390202	0.0001	0.122903	0.0392041	0.0001	0.0001	0.0001	0.0001	0.0001
AL627309.1	1.61933	6.38238	2.37639	1.21046	2.32063	2.09992	1.23028	5.68211	2.45157	1.70014	5.21298	2.3368	1.12182	3.89218	1.36415	1.1914	3.2693	1.02391
AL645728.1	0.110598	0.393227	0.186755	0.478098	0.298577	0.766788	0.132741	0.26018	0.390299	0.544983	0.686551	0.122903	0.547557	0.247717	0.687206	0.237133	0.500886	0.218892
AL645728.2	0.00443889	0.000102627	0.00864331	0.752774	1.17501	0.00381698	0.123397	0.0632624	0.0142299	0.304235	0.142683	0.186799	0.0396145	0.000248598	0.777083	0.0100356	0.0239078	0.000534739
AL672183.2	0.000123362	0.0001	0.0955123	0.000100001	0.0001	0.0001	0.0001	0.00010131	0.00174536	0.273997	0.0001	0.0001	0.0001	0.312183	0.259435	0.0826607	0.0001	0.0001
AL773604.8	0.0553489	0.0001	0.186755	0.0001	0.0001	0.0001	0.0001	0.0781241	0.0345293	0.0001	0.13739	0.0001	0.0001	0.247717	0.0001	0.0593583	0.0001	0.109496
AL773604.8	0.0553489	0.0001	0.186755	0.0001	0.0001	0.0001	0.0001	0.0781241	0.0345293	0.0001	0.13739	0.0001	0.0001	0.247717	0.0001	0.0593583	0.0001	0.109496
AL807752.1	0.221096	0.196663	0.124537	0.036869	0.0001	0.0001	0.0001	0.0781241	0.0345293	0.0390202	0.0001	0.122903	0.0392041	0.0001	0.0001	0.0001	0.0001	0.0001
AL953854.2	3.19829	11.0757	4.78893	0.970957	2.82548	0.678191	2.39803	2.48275	1.98375	3.76507	8.54104	7.63342	1.74787	7.85626	6.38556	3.07698	5.76421	9.43241
ALAD	40.8843	30.2708	29.9271	19.267	16.5656	18.8798	18.6362	17.2954	18.2015	23.2353	22.653	26.4028	8.75941	9.40956	12.1962	13.3925	18.1286	15.6438
ALAS1	37.0167	33.4158	30.7982	41.1816	40.5929	35.4274	40.8535	41.5874	39.7779	32.4595	24.0259	28.4905	33.5123	33.4284	37.9627	38.1625	31.6498	31.8344
ALCAM	255.969	182.411	178.691	510.191	451.146	357.732	327.298	294.426	256.379	191.914	175.181	181.381	208.937	234.247	196.513	153.42	162.956	152.388
ALDH16A1	15.3542	18.2805	16.9857	6.6553	10.2905	11.5963	9.98135	10.5334	10.742	13.3887	12.7681	16.947	8.25107	6.68577	7.34723	11.4962	8.31315	11.3773
ALDH18A1	104.475	100.051	104.279	89.2386	128.196	121.774	99.3474	100.624	90.419	79.0073	98.0254	103.154	81.064	104.99	108.563	85.5094	110.575	109.067
ALDH1A1	830.573	841.485	949.428	631.36	738.588	683.54	363.806	272.855	213.622	573.861	614.645	618.557	388.303	424.912	414.84	137.716	135.513	115.085
ALDH1A2	62.8734	72.9251	25.323	49.4885	70.4406	23.0966	35.5479	38.076	18.7059	75.2687	71.8029	32.0518	69.6054	84.4376	28.1714	40.8291	34.1537	24.833
ALDH1A3	4.45293	9.00931	15.6371	2.0336	7.72465	14.5115	7.47234	14.1895	24.7689	5.96066	9.53504	22.9293	9.28172	11.1429	23.0919	8.84989	13.0952	26.3666
ALDH1B1	31.6577	30.2708	27.0651	32.8716	41.4884	35.4914	31.0713	37.7117	33.7178	28.9957	28.2819	27.0168	44.1486	45.0664	38.6498	29.333	33.7531	36.429
ALDH1L1	0.828834	0.196663	0.124537	0.0001	0.0001	0.0001	0.0332603	0.0001	0.0001	0.116861	0.13739	0.0001	0.0001	0.0001	0.0001	0.0593583	0.0001	0.0001
ALDH1L2	2.54155	3.53824	3.11102	4.11824	5.22344	4.40856	10.6777	6.03396	8.4812	1.55691	2.19674	2.57897	2.22903	1.4858	5.32517	1.48156	1.60262	0.437685
ALDH2	92.1554	88.6502	53.5701	57.0653	65.6649	41.6247	60.252	57.5036	42.9216	92.3196	81.0016	53.9109	62.6061	51.0093	40.1958	55.8217	47.8754	34.0223
ALDH3A1	0.276345	0.393227	0.248973	0.257483	0.149338	0.351499	0.165901	0.208164	0.114864	0.233621	0.411971	0.0001	0.234724	0.0001	0.0001	0.0001	0.0001	0.0001
ALDH3A2	36.2434	46.9787	30.4249	13.4943	17.6102	14.3436	15.8175	18.9079	17.2377	33.1601	39.5397	29.1045	15.2116	17.0857	16.3189	17.7183	17.127	18.3787
ALDH3B1	0.607838	0.786353	0.560065	0.220714	0.447815	0.319553	0.0332603	0.338204	0.16077	0.739584	0.13739	0.122903	0.234724	0.247717	0.0001	0.118617	0.100257	0.0001
ALDH4A1	14.7777	18.477	10.4528	7.50097	10.1483	9.04064	8.6881	11.3656	10.2047	16.5801	10.846	11.0524	14.3513	10.1524	8.07359	12.8945	11.0743	11.2341
ALDH5A1	9.77915	16.9045	5.78641	3.0887	3.73106	2.42795	2.02288	2.57489	1.8019	11.2858	14.8274	7.98232	4.06692	2.97151	3.09208	2.37043	1.70277	1.20346
ALDH6A1	38.5915	50.5169	29.6627	19.6829	32.6833	16.9786	11.3315	18.988	12.3132	50.5589	51.8496	38.7917	22.7863	24.7618	16.4798	9.70317	12.6199	11.2776
ALDH7A1	30.5838	37.718	33.7312	18.5562	20.5603	22.1907	13.7561	17.7833	19.0951	15.062	17.8373	15.7247	7.13825	7.95978	12.6356	9.20014	12.2313	13.2582
ALDH7A1P1	6.87515	7.49179	7.58196	4.31436	5.10885	5.82554	3.35482	4.94793	5.60241	3.54208	4.9531	3.06438	1.9341	2.44034	3.85517	2.35543	2.09142	4.4642
ALDH8A1	0.0001	0.0001	0.311192	0.0001	0.447815	0.0639907	0.0664205	0.104132	0.103388	0.155781	0.686551	0.245707	0.19562	0.0001	0.0001	0.0001	0.200414	0.218892
ALDH9A1	57.7901	58.5759	55.4367	27.5033	44.4731	38.079	31.8671	35.345	34.2575	56.4737	52.9942	49.367	26.1607	25.7523	31.607	29.0366	28.5449	30.7404
ALDOA	396.634	364.427	340.585	266.536	283.702	281.085	328.746	311.941	320.755	235.389	186.989	207.783	223.323	190.17	202.009	268.915	279.338	274.367
ALDOAP2	0.221096	0.0001	0.0001	0.294252	0.0001	0.191772	0.0995808	0.104132	0.126341	0.155781	0.0001	0.0001	0.0001	0.247717	0.0001	0.177875	0.0001	0.11034
ALDOB	0.0553489	0.196663	0.0001	0.036869	0.149338	0.0001	0.0001	0.0521161	0.0230529	0.0779404	0.411971	0.122903	0.0783081	0.0001	0.0001	0.0593583	0.200414	0.0001
ALDOC	2.65205	4.91418	3.85764	1.58117	3.28334	3.0988	1.75759	3.5632	3.24793	1.71259	4.2561	1.71935	1.09501	1.23819	2.06142	0.651941	1.30214	1.96923
ALG1	14.5646	17.2486	14.0179	8.55709	7.73902	10.1438	12.4639	11.6309	14.0099	11.6105	11.5826	12.0531	7.16332	6.50546	8.11121	12.4861	11.4487	13.9299
ALG10	4.14377	5.897	6.06991	2.16947	1.64172	3.03864	3.70276	4.25091	4.22771	4.61792	5.57723	4.99736	2.52834	2.22866	2.23319	3.31856	3.55611	3.79358
ALG10B	3.20454	5.11075	6.31175	1.39732	4.02954	2.96728	2.59789	4.514	3.89781	3.24416	3.75871	3.23066	1.81241	1.98104	3.09208	2.8445	3.75557	3.53616
ALG11	12.9684	15.4579	15.2631	11.8351	20.8145	15.6924	15.003	15.4619	15.6312	13.1385	16.5894	15.4525	14.4991	15.5412	10.9179	16.2098	18.6474	16.5318
ALG12	16.5517	19.1456	15.7792	10.3055	15.67	12.1528	12.3561	12.1992	13.7845	13.7094	10.8013	14.0258	6.07889	8.54222	7.8155	11.0537	12.8496	15.1142
ALG13	14.2543	11.7939	14.497	14.6709	13.4315	13.0338	12.7668	13.6543	14.1276	16.0741	14.9647	17.9294	18.8874	17.8285	18.7237	17.3035	16.4259	14.878
ALG14	6.46422	5.50387	4.85313	5.25807	3.58182	4.7919	6.36687	5.48779	5.92194	6.30517	4.53068	5.15784	4.22334	1.98104	3.43563	5.27409	6.91095	6.45447
ALG1L15P	0.939331	1.57261	0.622284	0.220714	0.89553	0.862624	1.10061	0.525681	0.923397	0.778504	0.961132	0.491314	0.469349	0.0001	0.0001	0.592683	1.25169	0.921439
ALG2	40.4975	38.3299	36.7089	65.3754	85.8123	67.5004	51.3323	63.98	55.835	23.43	25.2615	25.052	48.3718	52.2473	47.4105	30.9921	50.8801	45.2902
ALG3	11.8234	14.3492	12.3193	10.847	10.7453	9.20036	11.1751	11.8858	12.3258	9.30204	9.885	9.33316	7.93823	9.40956	6.01227	7.5259	12.4196	9.40817
ALG5	17.0167	17.4942	15.368	15.8844	16.864	14.7589	15.1212	14.7467	14.908	16.2688	15.102	14.2453	10.5191	16.8381	13.7422	11.9703	14.9235	16.7377
ALG6	13.8676	13.563	15.8036	8.49376	10.2975	9.67953	11.9709	13.1862	12.3029	14.6341	19.6326	17.3154	10.1672	6.68577	10.822	12.2073	14.5229	13.0182
ALG8	19.3925	18.8702	21.7143	13.237	14.6255	14.1519	12.9658	15.2668	14.9654	15.4904	15.5139	13.7541	8.05554	11.1429	11.6809	12.6814	13.321	12.9088
ALG9	19.9913	23.1946	22.381	15.8485	18.5057	19.2295	20.1027	22.914	21.5838	20.6131	18.397	22.8491	16.2602	15.3524	17.006	20.3089	25.3583	24.2085
ALG9	19.9913	23.1946	22.381	15.8485	18.5057	19.2295	20.1027	22.914	21.5838	20.6131	18.397	22.8491	16.2602	15.3524	17.006	20.3089	25.3583	24.2085
ALKBH1	9.9449	11.0076	9.64395	9.48653	11.7899	10.8296	8.05804	10.8194	10.283	10.275	8.5121	10.07	9.26775	6.19053	8.24537	10.4888	11.8187	10.7209
ALKBH2	3.14929	5.897	4.23095	2.16947	2.53715	2.68351	2.88504	3.69324	3.69551	2.72451	4.39339	3.5614	3.01111	5.44768	4.63806	1.60007	3.5056	3.93836
ALKBH3	14.3648	15.332	10.8883	10.8837	7.16354	8.14616	11.1088	11.5217	11.2011	10.9756	10.5715	9.45596	7.39077	4.45721	5.8405	11.6147	9.01425	8.09542
ALKBH3-AS1	0.0001	0.58979	0.0623184	0.036869	0.298577	0.095936	0.0332603	0.104132	0.0001	0.0001	0.13739	0.0001	0.0001	0.0001	0.0001	0.0001	0.100257	0.109496
ALKBH4	7.65495	7.60667	7.64115	3.32623	4.22492	4.65044	4.96926	5.24004	4.57418	8.39677	6.63129	6.43582	4.89945	3.90313	4.34112	7.03857	10.4732	7.96403
ALKBH5	57.2375	64.4729	57.1163	39.8576	48.0549	42.0402	43.2078	40.8586	44.1838	48.9231	46.6788	53.5425	47.7069	38.3808	37.4473	45.6884	42.2663	45.8371
ALKBH6	4.862	3.77368	5.18068	2.24301	0.879426	2.1305	3.94614	3.12067	3.04149	4.11861	6.36603	3.31579	1.56426	1.98104	1.56085	2.78095	2.40387	2.18802
ALKBH7	7.7902	10.6145	6.84412	3.86085	4.47725	5.30303	5.47154	4.70755	5.43992	9.37988	5.07984	5.64906	5.51377	4.95244	5.15339	4.91854	5.60891	3.71957
ALKBH8	14.4201	15.332	16.3013	11.3618	8.35745	10.1268	12.3689	12.51	13.4619	15.4125	16.4749	17.0698	9.89344	11.1429	13.2269	13.274	15.224	14.331
ALMS1	23.0389	13.7595	23.2075	20.1496	15.2224	20.6687	19.7636	18.9079	17.582	22.4181	21.692	25.1748	20.2169	20.3047	22.8464	20.6812	18.1285	17.5035
ALMS1-IT1	0.0553489	0.0001	0.124537	0.220714	0.0001	0.287608	0.199062	0.13014	0.16077	0.116861	0.0001	0.36851	0.352037	0.0001	0.0001	0.118617	0.0001	0.109496
ALMS1P	0.221096	0.0001	0.0001	0.0001	0.0001	0.0639907	0.0001	0.026108	0.0001	0.194701	0.0001	0.36851	0.0001	0.495334	0.0001	0.0001	0.0001	0.0001
ALOX12	0.110598	0.0001	0.0623184	0.224365	0.0001	0.191772	0.132741	0.13014	0.185504	0.272541	0.274681	0.122903	0.156516	0.0001	0.515429	0.177875	0.300572	0.109496
ALOX5	0.110598	0.196663	0.0001	0.0736381	0.0001	0.0001	0.0995808	0.0521161	0.0001	0.0779404	0.0001	0.0001	0.117412	0.0001	0.0001	0.0593583	0.0001	0.0001
ALOX5AP	0.165847	0.0001	0.37341	0.110407	0.0001	0.159827	0.398023	0.13014	0.436204	0.233621	0.0001	0.0001	0.0783081	0.0001	0.515429	0.0001	0.0001	0.0001
ALOX5	0.110598	0.196663	0.0001	0.0736381	0.0001	0.0001	0.0995808	0.0521161	0.0001	0.0779404	0.0001	0.0001	0.117412	0.0001	0.0001	0.0593583	0.0001	0.0001
ALOXE3	0.0553489	0.0001	0.0001	0.220714	0.0001	0.0320453	0.398023	0.156148	0.241105	0.0390202	0.0001	0.0001	0.0001	0.247717	0.0001	0.0001	0.0001	0.109496
ALPK1	10.3316	7.4695	6.96856	5.111	6.41735	4.66412	6.53267	5.85191	5.53174	10.275	7.0019	6.75429	3.8323	5.20006	6.18405	3.73337	3.90623	2.735
ALPK3	142.874	89.8295	154.551	92.2904	54.6213	112.48	129.988	81.1712	117.932	112.324	94.4558	120.839	111.173	94.0947	108.906	189.271	139.219	175.472
ALPL	0.110598	0.0001	0.186755	0.220714	0.149338	0.0639907	0.0001	0.104132	0.0345293	0.0390202	0.13739	0.0001	0.0783081	0.247717	0.171876	0.177875	0.300572	0.109496
ALS2	49.6689	42.0646	44.673	44.0863	36.265	40.2514	41.9479	43.5636	39.9493	36.8184	36.6566	40.5253	38.4004	44.076	42.9442	41.7772	38.0599	39.9297
ALS2CL	5.46974	3.93137	3.98208	8.97174	6.11887	10.1268	19.8631	13.2902	14.4834	8.2901	6.59003	5.64906	4.84901	2.72389	6.5276	7.40739	3.80607	4.70414
ALS2CR11	0.0001	0.196663	0.0623184	0.0001	0.0001	0.0320453	0.0664205	0.0001	0.080435	0.0390202	0.0001	0.245707	0.0783081	0.0001	0.0001	0.0001	0.0001	0.0001
ALS2CR12	0.221096	0.0001	0.0623184	0.110407	0.149338	0.127881	0.199062	0.156148	0.126341	0.311462	0.274681	0.614117	0.273828	0.0001	0.0001	0.118617	0.100257	0.0001
ALX1	0.0553489	1.17948	1.18225	0.110407	0.149338	0.319553	0.0332603	0.13014	0.516539	0.0390202	0.0001	0.491314	0.0001	0.0001	0.687206	0.177875	0.100257	0.765873
ALYREF	42.4865	42.2612	42.3085	44.0862	45.9655	46.5766	42.1799	34.8508	45.114	41.6448	33.9108	41.8761	50.679	40.857	44.8338	53.0956	51.2806	57.5425
AMACR	12.6736	16.51	12.5054	7.24256	7.01419	7.14707	9.94743	6.94402	9.2684	14.6407	12.8324	14.0098	9.38962	8.66661	7.90116	10.1329	7.57217	9.54913
AMBRA1	25.6356	22.4083	26.8162	23.1646	28.0569	29.901	24.4724	25.566	26.0057	23.8971	22.2411	22.8415	22.0548	23.2761	17.3495	23.0516	24.8391	23.4109
AMD1	63.8679	85.8981	77.4613	71.1487	94.9156	76.0617	81.9723	92.1979	81.4728	57.3684	73.5878	83.9979	122.319	105.485	125.912	106.606	119.388	111.147
AMDHD1	0.0553489	0.0001	0.0001	0.0736381	0.0001	0.0320453	0.0664205	0.0001	0.0345293	0.0001	0.0001	0.0001	0.0783081	0.0001	0.0001	0.0593583	0.0001	0.0001
AMDHD2	9.99586	18.2823	9.43917	1.7234	6.54221	6.07329	4.93876	8.06044	8.57046	11.6802	12.1765	11.2477	5.334	3.77668	6.46541	6.36775	8.68698	10.6189
AMDP1	0.0001	0.0001	0.0001	0.0001	0.149338	0.0001	0.0332603	0.104235	0.0460057	0.0390202	0.0001	0.0001	0.0392041	0.495334	0.0001	0.177875	0.0001	0.109496
AMER1	10.0002	14.7423	8.83511	11.6927	11.4914	11.181	9.8487	11.8337	8.87138	7.86198	13.18	11.298	8.83761	12.6286	9.27603	8.71107	7.71221	5.90749
AMFR	69.4419	67.8144	72.2346	43.7552	59.2477	60.0245	58.657	60.779	67.4903	85.4272	75.9216	89.6396	75.7362	49.7712	68.1952	74.0124	70.0102	76.3563
AMH	0.165847	1.57261	1.43112	0.110407	0.447815	0.734843	0.0001	0.364212	0.355869	0.544983	2.33403	1.96495	0.0783081	0.990569	0.515429	0.237133	0.701201	0.328289
AMICA1	0.165847	0.393227	0.0623184	0.0736381	0.0001	0.0001	0.0001	0.026108	0.0115764	0.0779404	0.0001	0.245707	0.0392041	0.247717	0.0001	0.0001	0.0001	0.0001
AMIGO1	6.79571	9.04201	4.29317	0.698712	1.34325	0.830679	0.994908	1.19647	0.83788	4.94297	4.80526	4.17542	0.938598	0.495334	0.515429	1.06675	1.4023	0.437685
AMIGO2	18.2322	21.4255	15.3058	6.54499	8.05897	4.88774	9.71605	4.70755	4.45296	16.2688	18.397	13.0173	6.41316	4.70483	1.37431	11.7332	7.61113	6.45447
AMIGO3	2.66172	3.48032	3.5035	3.83596	4.32259	4.9163	1.27097	2.38853	2.70754	4.50871	5.81823	6.01018	4.45893	2.93082	6.60438	2.47494	7.87748	5.33509
AMMECR1	20.3317	18.8702	22.1499	16.105	13.1331	19.6784	19.631	18.0757	21.1626	25.2982	23.4767	29.5958	18.8874	17.5809	21.6439	29.3923	20.9329	27.6774
AMMECR1L	44.2553	45.9958	40.3176	52.6528	50.741	54.4028	51.4649	55.4492	54.8023	31.3309	34.46	34.7534	52.9474	54.2283	56.1711	47.6438	55.4873	47.8062
AMN	0.0677028	0.0001	0.0001	0.0001	0.0001	0.0001	0.0001	0.0306731	0.0412742	0.0865844	0.0001	0.0001	0.0001	0.0001	0.0001	0.0696217	0.119711	0.0001
AMN1	5.30313	6.4068	5.20885	4.15463	6.42906	6.24613	5.44905	5.69378	6.20773	7.50299	7.15815	8.06011	5.47231	3.91566	6.878	8.37907	8.28472	9.95782
AMOT	10.3869	8.45232	10.3906	5.66254	4.92497	5.75026	6.63215	3.64122	4.71691	10.314	8.51209	12.526	7.50808	4.20959	3.77918	10.7259	6.1097	5.5793
AMOTL1	83.6471	80.7877	84.3689	81.8478	73.127	65.0088	77.6278	78.1806	69.1551	73.2866	78.1186	92.8391	98.5436	90.6283	87.9499	112.414	106.767	102.833
AMOTL2	118.612	86.2915	97.4971	79.8508	35.9666	65.0407	85.4156	40.5178	60.7664	89.0083	70.5437	81.2959	41.7601	31.1999	43.116	58.6554	36.2571	53.9262
AMPD2	29.5007	25.9465	27.9984	18.7569	16.6271	21.621	23.6564	21.5498	24.6351	21.7131	19.358	19.858	21.702	18.819	19.9262	25.261	20.933	25.8153
AMPD3	3.03879	1.76917	1.12003	0.331021	0.0001	0.255663	1.98972	0.962397	0.791974	4.98189	3.02049	3.31579	0.86039	0.0001	0.343653	2.78524	0.901515	1.31285
AMPH	54.4204	14.7424	22.9587	35.8132	6.41735	16.42	25.003	9.64906	12.3257	18.8764	7.68836	10.1928	16.1892	8.41909	10.3067	11.1407	4.70749	8.31421
AMT	4.80675	6.68325	4.35539	0.956095	2.53715	1.91682	1.85708	2.47086	2.15767	5.68245	4.94255	3.31579	1.99441	1.73342	1.37431	1.95562	1.50246	0.875269
AMY2B	1.08504	2.32197	0.977094	0.58186	0.746298	0.61559	0.601891	0.64718	0.380677	2.71575	3.25843	0.738731	0.935905	2.32802	0.0001	0.39423	1.04464	0.266499
AMZ1	0.0001	0.196663	0.0001	0.147176	0.149338	0.0001	0.132741	0.0521161	0.0919114	0.0390202	0.13739	0.245707	0.0392041	0.0001	0.171876	0.177875	0.0001	0.0001
AMZ2	38.9427	30.0743	32.0425	24.2677	14.6255	17.6308	20.8911	16.9573	19.3264	29.1513	22.1038	26.28	16.883	15.3524	17.006	17.0072	12.1119	14.7686
AMZ2P1	5.14453	3.53824	4.23095	2.57393	1.79096	1.78904	3.11716	3.17308	2.65115	3.19156	2.60862	2.45617	2.47371	1.73342	2.06142	2.37043	1.20925	2.62561
AMZ2	38.9427	30.0743	32.0425	24.2677	14.6255	17.6308	20.8911	16.9573	19.3264	29.1513	22.1038	26.28	16.883	15.3524	17.006	17.0072	12.1119	14.7686
ANAPC1	50.5694	53.4803	58.3897	34.6701	40.1952	38.5604	47.2465	48.4036	47.1025	49.6288	48.565	62.7636	36.6574	30.032	46.8741	50.3453	56.851	54.285
ANAPC10	6.22908	9.6317	6.96289	5.91991	2.98487	4.34419	7.49192	6.49855	5.97478	6.80749	7.82564	6.87709	6.91245	7.67623	6.35583	5.209	7.96388	5.24174
ANAPC10P1	0.3463	0.393227	0.1302	0.147176	0.149338	0.0325175	0.201945	0.0818113	0.17717	0.198743	0.274681	0.36851	0.204686	0.0001	0.858982	0.185245	0.649847	0.337668
ANAPC11	15.9118	21.4255	19.5989	8.86144	15.2224	16.9631	15.1543	19.6882	20.4281	19.3824	17.0241	18.5434	14.4295	15.1048	17.5213	19.259	23.2366	21.9887
ANAPC13	45.852	46.2102	45.5153	26.1753	23.2174	24.2567	30.0458	23.4829	26.1061	36.6879	33.8366	32.9399	27.3906	15.291	30.1177	30.7638	24.9326	28.0541
ANAPC15	16.3031	14.5394	12.7481	13.3391	8.73742	10.2858	12.0768	9.53181	11.2282	13.8668	12.2354	12.6795	11.736	14.0402	12.295	10.3162	11.8806	12.2316
ANAPC16	39.1678	49.1409	38.0757	23.6058	31.0417	27.0897	28.12	32.3541	32.0767	44.1356	43.6584	38.4375	30.5403	28.7237	34.6989	27.4959	31.2492	28.7713
ANAPC1P1	0.120746	0.0001	0.0001	0.0001	0.0001	0.0335726	0.0001	0.0555299	0.0001	0.0415546	0.0001	0.0001	0.0001	0.0001	0.353473	0.0629919	0.0001	0.233885
ANAPC2	25.9671	26.3396	23.5186	13.7517	16.4163	18.2409	18.802	19.5581	20.5889	29.6963	28.8311	23.4555	20.9208	12.1333	21.6439	21.6887	23.6372	20.8948
ANAPC4	17.4588	16.708	19.2878	11.803	12.3869	12.6185	15.7844	17.5295	17.2491	17.9423	21.1428	18.789	12.7089	13.8667	14.4293	16.4739	16.0253	15.2062
ANAPC5	106.962	128.159	115.042	71.6997	96.408	92.6736	98.1546	99.4285	101.244	97.7677	109.558	98.12	80.1242	72.0567	75.2381	84.7987	93.0461	82.5941
ANAPC5	106.962	128.159	115.042	71.6997	96.408	92.6736	98.1546	99.4285	101.244	97.7677	109.558	98.12	80.1242	72.0567	75.2381	84.7987	93.0461	82.5941
ANAPC7	43.8558	44.7497	42.8989	38.3054	44.8093	40.3541	42.3528	46.7597	48.3421	45.4225	45.1196	47.8934	42.5464	41.3522	51.0177	43.6	53.0833	54.5233
ANG	4.67327	3.6452	3.00129	3.9155	2.94044	2.56306	1.7228	1.90934	1.72544	2.32638	0.960257	1.0599	1.25798	0.0001	1.73765	1.68567	0.836452	1.33219
ANGEL1	23.5361	28.1087	20.4077	18.6788	29.997	20.2854	26.4289	30.4295	21.2085	24.2085	30.3412	21.1223	16.8149	20.0571	17.3495	15.2887	15.6246	14.2216
ANGEL2	25.8565	29.0915	30.9226	17.4286	17.6102	22.202	24.4723	27.7246	25.6039	19.538	23.614	23.8239	18.2617	17.5809	18.7237	17.0072	24.2382	21.0041
ANGPT1	6.90622	7.4695	6.22194	1.39732	2.53715	1.21402	0.0995808	0.182156	0.275534	6.14949	7.41377	4.42102	2.11172	3.46674	2.06142	0.474166	0.400729	0.656477
ANGPT2	121.328	227.424	139.182	350.727	281.612	336.985	218.46	349.944	205.157	164.906	362.853	276.305	222.625	548.225	378.081	223.586	375.588	227.979
ANGPTL1	3.25979	1.96573	1.3689	1.87532	2.08944	0.862624	1.42599	1.11845	0.688686	4.82621	4.53068	2.45617	4.8099	4.95244	3.09208	0.948233	0.801358	0.328289
ANGPTL2	29.2268	28.1087	23.9542	12.8325	9.7006	9.48786	12.0041	11.9378	12.1421	39.3486	37.4803	40.2796	18.3008	19.0666	17.3495	22.9923	20.0316	18.4881
ANGPTL4	20.6632	9.82826	12.8171	3.64023	3.1341	2.42795	7.32852	10.8715	6.82857	16.0352	6.72732	8.47353	11.223	8.41909	5.32517	21.5108	22.3352	24.5048
ANGPTL5	2.5968	0.196663	1.49334	1.13994	0.298577	1.08624	0.630145	0.0521161	0.390299	1.32339	0.13739	1.35094	1.21233	0.0001	1.37431	1.36304	0.200414	0.109496
ANK1	1.27082	0.58979	0.995594	0.661943	0.298577	0.639007	0.431184	0.416228	0.401775	2.21855	0.549261	1.22813	1.32964	1.23819	1.20253	0.888974	0.500886	0.328289
ANK2	0.165847	0.0001	0.124537	0.0736381	0.0001	0.191772	0.265382	0.624293	0.677209	0.0390202	0.13739	0.491314	0.0783081	0.247717	0.858982	0.414908	1.10183	0.109496
ANK3	1.49182	0.393227	8.95955	0.661943	0.597053	7.28364	0.895427	1.06643	6.27801	0.350382	0.274681	1.71935	0.0783081	0.742952	1.20253	0.35565	0.400729	2.18802
ANKAR	1.16033	0.786353	1.24447	0.661943	0.298577	0.543171	0.862267	0.780341	0.80345	1.28447	1.373	1.35094	0.899494	0.742952	0.687206	0.7112	1.10183	0.437685
ANKDD1A	1.54707	2.75199	2.61327	1.76501	2.38791	2.396	2.12236	2.31481	2.89216	1.59583	2.74591	2.08776	2.58097	2.47627	3.77918	2.01488	2.90466	2.735
ANKDD1B	0.165847	0.196663	0.0001	0.0736381	0.0001	0.0320453	0.165901	0.26018	0.0460057	0.350382	0.274681	0.36851	0.234724	0.0001	0.0001	0.0001	0.0001	0.0001
ANKEF1	2.09956	3.14511	3.67098	0.956095	1.79096	1.15013	2.95136	2.00272	3.11022	1.98503	1.64758	1.59654	1.48605	0.247717	2.9203	3.43708	2.50403	2.40682
ANKFN1	0.110598	0.196663	0.0001	0.036869	0.597053	0.095936	0.232222	0.884373	0.114864	0.0390202	0.13739	0.0001	0.0392041	0.495334	0.171876	0.0593583	0.0001	0.0001
ANKFY1	67.0725	61.9175	67.5072	67.8391	76.7087	78.8087	89.6651	92.2238	84.6416	41.6837	43.7894	50.5951	39.9253	40.3617	49.8152	54.2213	66.3042	59.4023
ANKH	16.409	16.3148	19.5989	10.3322	13.1331	12.938	14.9554	19.9743	19.3035	14.8287	15.2393	22.4731	13.6474	12.8762	17.1777	13.1554	21.1333	23.1921
ANKHD1	76.5534	67.6286	82.5724	83.369	69.3138	71.8703	66.1388	70.5238	62.8379	66.4559	78.5978	76.9991	80.4773	88.8043	84.3128	79.6157	77.7084	64.0794
ANKHD1-EIF4EBP3	23.2475	22.588	13.4162	23.1848	24.7065	18.2254	14.441	16.8884	13.0159	22.5282	18.8192	19.8928	14.2486	15.8507	19.8238	11.2015	21.3357	16.4363
ANKIB1	71.9891	70.9595	73.7911	80.0464	79.5441	85.167	77.4958	83.0947	79.7854	87.843	92.5336	103.769	102.843	106.228	112.342	105.776	105.666	109.943
ANKLE1	1.43619	1.57261	1.92887	0.441329	0.597053	0.89457	0.696466	0.832357	1.26251	1.01203	1.61774	1.59654	0.899494	1.98104	0.171876	0.948233	1.4023	0.875269
ANKLE2	60.0002	71.156	78.5816	113.727	142.821	163.241	128.827	165.88	185.608	73.053	81.1388	89.6466	95.57	103.752	108.563	95.9389	115.181	124.602
ANKMY1	4.73122	2.81298	3.79542	1.99388	2.53715	1.98071	2.92925	3.82328	3.29248	4.26024	3.07454	4.42102	3.5063	1.73342	4.80984	3.67411	4.27691	4.59474
ANKMY2	11.0499	15.5286	11.7594	7.02298	6.26811	7.09198	8.78755	9.07691	8.83694	12.4935	14.141	14.8593	8.64209	8.91432	8.07359	10.3111	11.418	10.2833
ANKRA2	7.73494	9.82826	6.90634	3.27254	4.62649	4.53382	4.90314	6.26803	5.61121	8.86729	7.52695	9.82437	5.82661	4.20959	4.12273	4.44447	4.50718	3.06319
ANKRD1	581.329	284.82	441.999	1156.61	424.732	695.29	1208.73	502.163	696.137	242.278	222.96	275.694	206	226.322	303.529	126.457	110.273	134.776
ANKRD10	25.2489	31.6468	22.461	9.81743	18.2072	15.9408	15.9502	19.5061	14.5866	26.1545	30.4785	23.9467	17.3623	17.0857	15.46	30.8736	28.9455	22.6451
ANKRD10-IT1	0.110598	0.196663	0.0623184	0.0001	0.0001	0.191772	0.232222	0.208164	0.252581	0.0779404	0.13739	0.245707	0.0392041	0.247717	0.0001	0.177875	0.500886	0.328289
ANKRD11	170.978	136.484	162.402	281.355	181.835	185.499	192.181	177.884	177.82	231.228	205.312	222.212	300.721	336.598	272.517	268.94	207.517	249.885
ANKRD12	68.3425	75.2837	68.1912	129.392	108.198	99.4474	91.4559	89.1544	79.1506	88.7791	98.9859	94.3133	98.8162	121.332	96.1952	86.695	74.8163	70.9982
ANKRD13A	44.2026	40.5863	40.2258	39.2287	33.6754	34.2978	41.8813	35.6948	36.2531	50.1887	44.339	41.0789	36.1411	33.6092	36.4949	39.9211	33.2672	34.9368
ANKRD13B	22.2654	20.6392	21.8388	17.3551	14.7747	15.1422	13.1316	14.4866	15.6425	23.8581	22.1039	25.7888	24.5965	33.676	22.331	21.3924	28.2445	23.6297
ANKRD13C	28.1217	30.4674	26.8784	22.6867	24.6244	21.4036	27.7219	26.7621	24.6627	27.9058	30.2039	34.1394	21.1553	30.7046	27.8279	25.1849	29.8469	26.0364
ANKRD13D	9.55816	15.5286	9.64395	10.6999	9.70059	9.36008	10.6777	12.2239	11.1093	17.7088	21.2801	17.3154	11.0274	10.1524	13.5704	18.785	17.2271	19.2538
ANKRD16	2.73073	3.34168	3.53081	1.17671	0.597053	0.982833	1.97662	1.92469	1.79042	2.18189	1.20321	2.18857	1.79889	2.72389	1.60699	1.83711	1.10183	1.85983
ANKRD17	127.292	96.1193	135.885	144.685	104.168	114.363	106.211	97.3467	93.5924	127.386	122.6	126.364	132.367	137.675	129.004	135.641	115.781	109.943
ANKRD18A	0.118127	0.0001	0.0623184	0.405881	0.0001	0.295251	0.202035	0.026108	0.0499403	0.237561	0.0001	0.122903	0.274733	0.0001	0.171876	0.180822	0.0001	0.0001
ANKRD18B	2.09203	0.196663	6.34637	5.21998	2.08944	7.75517	4.97117	2.96502	7.20614	1.43621	1.23571	3.4386	2.14767	0.742952	4.46629	2.13045	0.801358	2.18802
ANKRD18EP	1.43657	1.96573	1.74221	0.919326	1.64172	1.0543	2.28816	2.02873	1.6068	1.59583	1.23571	1.59654	1.17322	0.742952	0.858982	1.4223	1.20199	1.85983
ANKRD19P	0.397654	0.0001	0.223869	0.139124	0.0001	0.28771	0.0001	0.0936385	0.247691	0.140078	0.0001	0.0001	0.0001	0.0001	0.343653	0.296391	0.180208	0.587479
ANKRD2	0.276345	0.196663	0.435629	0.147176	0.298577	0.223717	0.0664205	0.13014	0.080435	0.350382	0.0001	0.36851	0.19562	0.0001	0.0001	0.0593583	0.100257	0.109496
ANKRD20A1	1.2748	1.64432	0.0770009	0.188389	0.000133504	0.200168	0.000701588	1.25427	0.211627	0.665387	0.414162	1.31992	1.70061	3.2462	0.0001	0.755049	1.72402	0.029292
ANKRD20A11P	0.0553489	0.0001	0.0001	0.147176	0.0001	0.0001	0.0995808	0.0001	0.0001	0.0001	0.274681	0.0001	0.0001	0.0001	0.0001	0.0001	0.0001	0.0001
ANKRD20A12P	0.0001	0.196663	0.0001	0.0001	0.0001	0.0001	0.0332603	0.200764	0.0150583	0.0001	0.264684	0.0001	0.0001	0.0001	0.0001	0.0001	0.0387064	0.0001
ANKRD20A14P	0.0001	0.0001	0.0623184	0.036869	0.149338	0.0001	0.0001	0.298099	0.0001	0.0909229	0.994824	0.0001	0.0783081	1.73342	0.0001	0.000100096	0.691145	0.0001
ANKRD20A2	0.795456	0.907658	0.0770009	0.188389	0.895496	0.0001	0.402417	0.171391	0.0883435	1.27839	0.867191	0.000100042	0.783017	0.0229039	0.0001	0.730377	0.377404	0.280289
ANKRD20A3	0.961468	0.0001	0.346488	0.368601	0.000100088	0.0640782	0.439759	0.258223	0.0238735	0.736956	0.416179	0.399532	0.242179	0.282556	0.858982	0.000787161	0.135316	0.000100084
ANKRD20A4	0.434353	1.18302	0.25145	0.04551	0.0001	0.151343	0.198419	0.547313	0.189185	0.482088	0.640047	0.0001	0.473195	0.905853	0.171876	0.342158	1.53846	0.307782
ANKRD20A7P	0.0001	0.0001	0.0001	0.0001	0.0001	0.0001	0.0001	0.155131	0.0001	0.0890059	0.164739	0.0001	0.0001	0.0001	0.0001	0.0001	0.431909	0.0001
ANKRD23	0.775707	3.01617	0.722592	0.253248	0.298577	0.173042	0.2804	0.485982	0.554968	0.445264	0.400589	0.288528	0.340006	0.247717	0.375834	0.775253	0.319513	0.779593
ANKRD24	0.773585	1.17948	0.248973	0.147176	0.298577	0.191772	0.165901	0.104132	0.103388	0.428222	0.549261	0.36851	0.156516	0.742952	0.687206	0.296391	0.100257	0.0001
ANKRD26	22.4311	33.0227	22.5853	17.6492	18.9534	14.5033	17.0777	19.9222	15.7459	21.6397	32.6752	26.6484	14.1949	19.3143	17.1777	14.5184	17.2271	13.5652
ANKRD26P1	0.0553489	0.0001	0.124537	0.294252	0.0001	0.415389	4.44358	3.61521	4.23491	0.0390202	0.274681	0.0001	0.508453	0.990569	0.515429	3.61486	4.90781	2.735
ANKRD27	23.9781	26.5361	22.8964	35.3719	38.2051	38.9415	34.9179	40.3906	35.6732	23.1965	23.5421	24.1924	39.5343	41.8474	40.8829	33.007	33.052	39.0545
ANKRD28	70.553	89.8296	66.8224	38.3134	44.0254	32.8718	36.2111	34.2526	27.819	82.7831	90.6119	78.4713	44.9697	52.2474	42.0853	41.2438	41.8659	34.7881
ANKRD29	0.718336	0.786353	0.248973	0.147176	1.19401	0.159827	0.0332603	0.026108	0.0345293	0.583903	0.961132	0.245707	0.19562	0.0001	0.0001	0.0001	0.0001	0.0001
ANKRD30BL	0.49734	0.0001	0.497847	0.036869	0.298577	0.383444	0.762786	0.208164	0.355869	0.661744	0.823842	0.122903	0.586661	0.495334	0.171876	0.533425	0.701201	0.547081
ANKRD31	0.0001	0.0001	0.186755	0.036869	0.0001	0.0001	0.0001	0.026108	0.0001	0.116861	0.0001	0.0001	0.0001	0.0001	0.0001	0.118617	0.0001	0.0001
ANKRD32	6.62997	7.4695	5.84863	2.53716	3.58182	3.99327	4.1783	4.2134	4.72839	5.17649	5.21713	7.2455	2.18993	4.45721	5.8405	4.38521	4.60733	5.6887
ANKRD33	0.0553489	0.0001	0.0623184	0.036869	0.0001	0.0320453	0.199062	0.13014	0.241105	0.272541	0.274681	0.491314	0.273828	0.247717	0.343653	0.237133	0.300572	0.547081
ANKRD33B	1.98906	0.58979	1.18225	2.79455	2.53715	2.42795	2.88504	2.54889	2.57082	0.506063	0.686551	0.614117	0.703973	1.98104	1.54609	0.651941	2.00324	0.765873
ANKRD34A	0.331593	0.786353	0.808939	0.220714	0.149338	0.223717	0.165901	0.0781241	0.367346	0.428222	0.549261	0.0001	0.156516	0.0001	0.171876	0.474166	0.100257	0.218892
ANKRD34A	0.331593	0.786353	0.808939	0.220714	0.149338	0.223717	0.165901	0.0781241	0.367346	0.428222	0.549261	0.0001	0.156516	0.0001	0.171876	0.474166	0.100257	0.218892
ANKRD35	0.386842	0.196663	0.0001	0.036869	0.0001	0.0320453	0.0664205	0.026108	0.0919114	0.350382	0.0001	0.122903	0.0001	0.0001	0.0001	0.0593583	0.0001	0.0001
ANKRD35	0.386842	0.196663	0.0001	0.036869	0.0001	0.0320453	0.0664205	0.026108	0.0919114	0.350382	0.0001	0.122903	0.0001	0.0001	0.0001	0.0593583	0.0001	0.0001
ANKRD36	5.82699	8.25346	5.83887	5.62477	6.72146	5.50852	4.95659	6.63223	4.53679	6.87618	11.6341	6.301	7.96862	10.6219	8.04941	5.62479	4.99963	5.1268
ANKRD36B	3.39252	2.82816	4.32395	4.23367	3.66393	3.67566	2.61821	1.86024	2.75063	5.06944	5.00257	5.26458	4.29514	4.06712	9.07721	4.95223	2.99135	4.00294
ANKRD36BP2	0.165847	0.0001	0.0001	0.0001	0.0001	0.0320453	0.0001	0.026108	0.0689586	0.0001	0.13739	0.0001	0.0001	0.0001	0.0001	0.0001	0.0001	0.0001
ANKRD36C	2.6593	4.25061	3.1522	3.52579	2.89712	1.83726	2.83782	2.45721	1.90549	3.38925	5.33004	5.13598	3.80831	0.911159	2.28442	3.05269	2.02505	1.70079
ANKRD37	2.17226	1.32251	1.26384	0.556426	1.00257	0.647576	1.18858	0.979442	0.673089	1.1097	0.886957	0.867296	0.986294	0.65791	1.65284	1.76367	0.890774	1.17017
ANKRD39	3.8138	3.32721	4.87816	1.73248	0.298577	2.67357	2.73738	2.46041	2.87799	3.64823	4.13019	4.3782	1.77235	2.72389	4.09055	2.72604	4.18776	3.26827
ANKRD40	67.238	69.5835	64.3339	60.8897	64.1726	57.4698	69.8688	73.4467	72.3588	102.205	101.046	109.172	102.57	119.599	107.532	104.769	113.779	129.306
ANKRD42	10.737	8.25576	9.95504	6.61853	9.70055	5.94194	11.5399	12.4059	11.1781	8.56254	10.4342	8.96105	7.27346	9.90479	11.8527	11.6792	14.8234	10.8027
ANKRD44	1.38132	1.17948	0.995594	0.809019	0.597053	0.89457	1.29335	2.21078	1.52647	2.37423	2.19674	2.21056	0.821285	0.247717	1.71786	1.95562	1.70277	2.18802
ANKRD45	0.386842	0.196663	0.37341	0.220714	0.0001	0.0001	0.298542	0.208164	0.080435	0.467143	0.549261	0.491314	0.234724	0.0001	0.171876	0.296391	0.200414	0.328289
ANKRD46	12.0444	14.3492	17.3891	7.75837	8.65592	10.03	9.25434	11.5737	10.8028	17.8983	20.8682	22.4731	15.368	16.5905	17.0059	12.9147	20.6236	18.0505
ANKRD49	7.7195	11.2042	10.0173	7.99215	10.4468	9.00888	9.53484	10.0652	9.25146	7.93982	8.92397	7.4911	6.49137	5.20006	7.90182	8.77033	10.8171	8.53301
ANKRD50	190.441	138.578	206.381	108.065	69.2467	106.891	142.653	117.091	136.09	82.8997	65.0755	90.8749	76.7613	53.2378	83.4832	98.2507	79.4249	98.1283
ANKRD52	110.443	98.2817	125.183	156.857	129.091	149.536	150.813	154.8	146.027	98.4682	104.478	107.699	111.447	124.056	113.716	150.99	170.568	153.045
ANKRD53	0.828834	0.58979	0.684502	1.76501	1.04477	0.894569	1.82392	0.650301	0.837879	1.16771	0.411971	0.36851	0.977702	0.0001	1.54609	0.35565	0.300572	0.0001
ANKRD53	0.828834	0.58979	0.684502	1.76501	1.04477	0.894569	1.82392	0.650301	0.837879	1.16771	0.411971	0.36851	0.977702	0.0001	1.54609	0.35565	0.300572	0.0001
ANKRD54	14.6897	14.0653	15.2906	11.1018	11.9992	10.8054	13.6885	13.9208	14.1276	11.8351	10.2191	12.7062	10.2843	12.2635	8.46805	15.0559	12.5894	15.6596
ANKRD55	1.76806	3.34168	16.6746	0.956095	2.53715	8.94481	1.19387	4.34344	25.8795	2.56883	3.43236	17.1926	5.31826	6.19053	21.8157	3.85189	4.70749	17.7223
ANKRD6	14.7329	14.7043	7.30846	8.52381	5.36437	4.22513	6.9591	5.31301	3.69343	20.9311	14.1089	7.6856	13.7966	14.5205	6.39131	10.2643	7.52441	5.50683
ANKRD61	0.0001	0.196663	0.0001	0.147176	0.0001	0.0639907	0.265382	0.338204	0.195199	0.233621	0.411971	0.36851	0.273828	0.742952	0.171876	0.0001	0.0001	0.547081
ANKRD65	0.276345	0.0001	0.186755	0.110407	0.0001	0.0001	0.0332603	0.0001	0.0460057	0.0390202	0.274681	0.0001	0.0001	0.0001	0.0001	0.0001	0.0001	0.0001
ANKRD7	0.165847	0.0001	0.124537	0.036869	0.298577	0.0001	0.0332603	0.182156	0.149294	0.233621	0.274681	0.245707	0.19562	0.247717	0.0001	0.0593583	0.100257	0.437685
ANKRD9	2.65205	0.982916	2.42662	1.32379	1.49248	2.36406	2.68608	1.69062	2.99545	3.96996	1.92216	2.33336	2.46366	2.72389	0.687206	3.14079	2.50403	3.71957
ANKS1A	41.3815	57.3966	36.8956	14.7445	14.6255	16.7395	19.7636	17.2694	17.341	85.43	106.675	74.2961	101.827	70.3234	57.3734	54.103	52.5827	39.8203
ANKS1B	0.442091	0.58979	0.186755	0.29699	0.0001	0.0320453	0.232222	0.338204	0.0919114	0.35369	0.13739	0.0001	0.19562	1.23819	0.0001	0.391665	0.100257	0.0001
ANKS3	4.58576	5.897	5.22644	4.48592	5.37268	5.43081	4.64254	5.25372	5.58912	5.02081	9.74771	6.38588	5.7484	3.46674	4.98162	6.63703	7.31158	6.12629
ANKS6	26.5749	29.288	23.892	9.48652	9.84983	10.7976	14.4248	16.6712	14.2423	17.7088	20.1818	16.3329	9.93254	10.4	10.822	11.7925	17.0268	17.7223
ANKZF1	17.293	26.5361	19.7855	9.11882	9.55135	9.80732	12.402	15.6309	14.185	25.4539	31.4396	21.8591	10.4409	14.8571	13.2269	18.6072	13.321	13.8934
ANLN	102.983	73.1216	99.9859	110.639	68.0527	83.9197	58.4946	41.3526	52.0005	101.428	67.2724	100.208	77.7004	56.952	80.735	73.6578	46.0724	64.9813
ANO1	0.221096	0.58979	0.0001	0.036869	1.19363	0.14942	0.298542	0.38988	0.195199	0.209385	0.661025	0.0001	0.430245	1.98104	0.171876	0.237133	0.979049	0.547081
ANO10	42.818	42.2612	40.0065	27.6872	27.7584	30.9232	34.0224	35.6051	34.9803	37.5192	32.8125	34.5079	21.2336	19.3142	23.5335	27.7922	25.6404	30.084
ANO2	5.30399	8.25576	6.7819	2.5004	7.0143	4.50439	3.08401	3.8753	4.03981	10.3918	11.8071	14.1225	3.55857	6.68577	6.01228	5.51112	7.61205	9.07998
ANO4	0.110598	0.393227	0.186755	0.036869	0.149338	0.0639907	0.0001	0.13014	0.0574821	0.0001	0.0001	0.0001	0.0001	0.247717	0.0001	0.0593583	0.200414	0.0001
ANO4	0.110598	0.393227	0.186755	0.036869	0.149338	0.0639907	0.0001	0.13014	0.0574821	0.0001	0.0001	0.0001	0.0001	0.247717	0.0001	0.0593583	0.200414	0.0001
ANO5	4.14377	5.30731	2.61327	1.25025	0.89553	1.15013	3.31613	1.63861	1.34284	5.99381	1.64758	2.33336	1.64247	1.23819	0.687206	4.20744	1.20199	0.437685
ANO6	123.815	117.349	127.424	151.67	144.612	147.043	177.902	188.713	172.811	174.241	171.2	192.309	194.929	183.732	204.244	197.276	202.619	208.289
ANO7	0.442091	0.393227	0.684502	0.478098	0.298577	0.798734	0.663305	0.728325	0.918214	0.389302	1.78487	0.614117	0.664869	0.0001	0.343653	1.48156	2.00324	1.20346
ANO7P1	0.0553489	0.393227	0.0001	0.0736381	0.149338	0.0001	0.0332603	0.0521161	0.0345293	0.0390202	0.0001	0.245707	0.0001	0.0001	0.0001	0.0001	0.0001	0.109496
ANO8	6.74046	6.09356	6.71968	1.43409	1.64172	2.77935	2.38764	1.82066	2.91511	11.1312	8.37481	7.98232	5.04453	1.73342	5.8405	5.21483	3.00482	2.735
ANO9	0.0001	0.0001	0.0001	6.6553	11.4915	15.6852	46.1924	37.1396	56.4987	0.155781	0.0001	0.0001	0.156516	0.247717	0.687206	0.770458	1.00167	0.328289
ANP32A	210.361	207.568	193.057	107.787	91.7784	105.224	84.2571	66.4485	75.6398	211.055	228.986	218.71	110.038	125.047	129.863	117.507	108.263	109.067
ANP32AP1	2.68554	1.01894	0.912331	0.568347	0.449402	0.737972	0.586953	0.417918	0.271473	1.28834	2.3489	1.69531	0.430585	0.247717	1.03076	0.761907	0.708513	0.32901
ANP32B	157.678	137.725	115.368	183.097	117.837	104.27	132.183	138.79	123.3	130.619	116.797	118.491	146.419	171.815	134.823	111.658	122.673	123.492
ANP32BP1	7.84791	5.96268	4.90021	6.81516	6.77681	4.40872	4.96812	5.42465	4.80118	5.56246	4.43018	3.94462	5.46105	4.98434	5.34641	4.48832	3.62496	3.18903
ANP32C	1.31863	0.556018	0.462746	0.701924	0.300273	0.48058	0.244673	0.130458	0.166096	0.430804	0.961132	0.394733	0.275167	0.495334	1.03076	0.474166	0.400729	0.218892
ANP32D	0.110598	0.0001	0.0623184	0.0736381	0.0001	0.0320453	0.0664205	0.026108	0.0115764	0.0001	0.13739	0.0001	0.0001	0.495334	0.171876	0.0701845	0.0001	0.0001
ANP32E	79.8346	88.8465	89.6565	108.175	109.243	96.059	101.204	95.7087	92.7426	83.6009	82.6488	96.0322	93.0285	97.0661	108.048	86.5762	80.9275	80.5156
ANP32E	79.8346	88.8465	89.6565	108.175	109.243	96.059	101.204	95.7087	92.7426	83.6009	82.6488	96.0322	93.0285	97.0661	108.048	86.5762	80.9275	80.5156
ANPEP	108.619	108.896	165.376	73.5016	54.7706	117.559	51.9623	54.0449	123.187	192.343	116.285	233.082	160.992	103.256	225.543	158.872	90.6424	219.558
ANTXR1	3.64653	6.09356	16.5502	2.57393	0.89553	7.66698	1.35967	1.24849	3.6037	3.93104	6.31545	13.0173	2.73738	2.97151	6.35583	2.78524	2.8045	9.51757
ANTXR2	56.8512	77.6426	69.6848	49.3074	84.1705	65.5522	77.33	173.966	121.143	86.7538	111.343	106.225	89.8614	113.161	116.808	147.495	233.466	198.226
ANXA1	325.412	264.574	271.339	240.325	221.32	222.752	205.425	125.595	145.188	318.519	262.771	270.782	276.147	198.342	252.683	183.999	136.615	179.302
ANXA11	64.6964	64.866	58.8587	39.5637	37.0112	39.293	44.8329	38.6221	44.7927	62.3119	54.7789	64.9633	39.5342	28.7237	34.5271	41.5402	33.5528	37.4136
ANXA2	976.575	794.67	831.154	853.064	654.208	761.643	728.765	596.082	725.813	1080.23	844.67	995.87	923.498	852.863	939.416	961.25	777.086	1054.82
ANXA2P1	4.83819	0.992585	1.6269	3.21228	1.20104	1.31811	1.30257	1.77871	1.1682	2.39565	2.21492	1.3588	1.17988	2.73066	0.518546	1.01407	2.94118	1.1035
ANXA2P2	729.981	571.035	594.813	599.056	489.7	527.659	538.574	425.877	512.624	787.903	605.227	698.925	691.559	623.662	726.981	702.617	549.769	725.228
ANXA2P3	0.828834	0.196663	0.560065	1.10317	0.298577	0.351499	0.431184	0.416228	0.447681	0.895265	0.549261	0.982527	0.312933	0.495334	0.343653	0.296391	0.701201	0.875269
ANXA2R	4.69626	4.12793	1.86665	1.10317	0.298577	0.447335	1.02807	0.858365	0.665733	5.17649	2.74591	4.17542	1.40785	0.742952	1.20253	2.42969	1.30214	2.07863
ANXA3	42.7627	13.3664	19.7855	38.4973	16.5655	19.1673	36.1778	12.7441	19.9233	43.6294	17.2987	26.1572	39.3779	22.7809	35.9014	31.0515	10.9172	23.7391
ANXA4	40.5529	43.4406	34.7801	26.6209	32.0864	25.6841	28.0206	27.1784	28.1406	44.4858	39.677	35.7359	36.4843	30.9522	30.9198	29.57	24.3383	28.5525
ANXA5	344.196	220.937	334.729	371.678	216.246	333.841	350.493	222.526	361.148	285.68	166.122	279.497	282.84	195.618	313.835	303.886	201.717	352.143
ANXA6	142.708	137.594	127.859	109.793	108.646	124.81	121.698	100.21	116.208	150.776	125.346	160.503	118.8	113.409	123.335	143.582	128.502	152.061
ANXA7	60.2201	67.0282	56.4921	78.3911	86.7076	78.0749	106.61	101.926	102.979	51.6469	52.0331	47.4023	64.1699	57.1997	61.3242	62.2213	60.2948	60.6055
ANXA9	0.99458	0.393227	0.497847	0.183945	0.149338	0.127881	0.331703	0.26018	0.309964	0.700664	0.411971	0.491314	0.156516	0.0001	0.343653	0.237133	0.701201	0.218892
AOC2	0.276345	0.786353	0.497847	0.331021	0.447815	0.575116	0.431183	0.572277	0.390299	0.661743	2.05945	1.10533	0.860389	1.98104	1.03076	0.7112	2.30372	2.29742
AOC3	0.276345	0.196663	0.124537	0.0001	0.447815	0.095936	0.0332603	0.156148	0.126341	0.272541	0.411971	0.245707	0.156516	0.742952	0.0001	0.0593583	0.400729	0.218892
AOX1	0.0001	0.196663	0.0001	0.110407	0.0001	0.287608	0.0664205	0.0781241	0.0689586	0.0390202	0.0001	0.0001	0.0392041	0.0001	0.171876	0.0593583	0.0001	0.0001
AP000230.1	0.0001	0.786353	0.0001	0.110407	0.0001	0.0320453	0.0001	0.026108	0.0115764	0.194701	0.13739	0.122903	0.19562	0.0001	0.0001	0.0001	0.0001	0.0001
AP000254.8	0.276345	0.58979	0.248973	0.331021	0.447815	0.287608	0.232222	0.312196	0.401775	0.506063	0.823842	0.122903	0.234724	0.0001	0.515429	0.177875	0.100257	0.437685
AP000265.1	0.0553489	0.0001	0.0001	0.0001	0.0001	0.0001	0.0001	0.0781241	0.0689586	0.0001	0.0001	0.0001	0.0001	0.0001	0.0001	0.0001	0.0001	0.109496
AP000275.65	0.571706	0.0159571	0.0231605	2.71645	2.20331	0.634589	0.00194483	0.127196	0.100008	0.00108981	0.17085	0.936079	0.195982	0.846169	0.175095	0.231442	0.853982	0.0348598
AP000295.9	0.0113373	1.34292	0.261887	0.481434	0.254193	1.2836	0.515062	0.821215	0.779097	0.117212	0.384429	0.000242905	0.361684	0.789352	0.639091	0.455315	0.513329	0.927018
AP000347.2	2.76325	7.16762	4.25507	0.995627	3.38836	2.41609	2.52261	3.23241	3.34027	4.7245	1.88381	5.50975	1.09878	0.713462	2.4783	4.55653	4.01671	4.59148
AP000347.4	0.163561	0.0001	0.0001	0.0381569	0.0001	0.0001	0.0375885	0.178325	0.101591	0.0001	0.167979	0.0001	0.0001	0.0001	0.0001	0.0001	0.0001	0.0001
AP000350.4	1.32488	2.54705	2.95398	1.21546	2.80982	2.45434	2.46555	1.66565	2.31174	3.4765	2.2185	3.45635	2.67876	0.374943	1.32724	2.4284	1.82541	3.17602
AP000350.5	0.442091	0.0001	0.248973	0.110407	0.0001	0.575116	0.199062	0.156148	0.493586	0.155781	0.13739	0.73692	0.312933	0.0001	0.687206	0.0001	0.0001	0.0001
AP000350.6	0.331593	0.0001	0.0623184	0.147176	0.0001	0.351499	0.265382	0.26018	0.218152	0.155781	0.411971	0.122903	0.234724	0.0001	0.343653	0.177875	0.100257	0.547081
AP000351.10	0.0553489	0.0001	0.0001	0.0001	0.0001	0.095936	0.0332603	0.0521161	0.0345293	0.0001	0.0001	0.0001	0.0001	0.0001	0.0001	0.0001	0.0001	0.0001
AP000354.2	0.110598	0.0001	0.000100001	0.147176	0.0001	0.095936	0.0332603	0.0521161	0.0345293	0.272541	0.274681	0.0001	0.0392041	0.0001	0.0001	0.0001	0.200414	0.0001
AP000356.1	2.54412	2.59299	0.187185	0.596783	2.87418	0.734863	1.20554	1.42202	0.594908	0.671819	0.875858	0.486777	0.206366	0.495334	0.205163	0.550257	0.979748	0.232975
AP000357.4	1.60232	0.58979	0.74672	0.444885	0.597053	0.93432	0.935576	0.832357	0.794378	1.09366	0.549261	0.614117	0.664869	0.247717	0.515429	1.18563	1.60343	0.992766
AP000442.1	0.110598	0.0001	0.0001	0.257483	0.0001	0.287608	0.165901	0.156148	0.195199	0.0779404	0.13739	0.122903	0.19562	0.0001	0.171876	0.177875	0.200414	0.109496
AP000473.5	0.276345	0.0001	0.186755	0.0001	0.0001	0.0001	0.0001	0.104132	0.0001	0.194701	0.0001	0.122903	0.234724	0.247717	0.0001	0.118617	0.0001	0.0001
AP000473.8	0.49734	1.37604	0.435629	0.036869	0.149338	0.0320453	0.0332603	0.026108	0.0460057	0.389302	0.0001	0.36851	0.19562	0.0001	0.0001	0.118617	0.0001	0.109496
AP000476.1	0.0001	0.393227	0.0001	0.0736381	0.0001	0.0001	0.0332603	0.0001	0.0574821	0.0001	0.0001	0.0001	0.0392041	0.0001	0.0001	0.0593583	0.0001	0.0001
AP000487.5	0.335236	0.58979	0.187868	0.29561	0.0001	0.548097	0.334153	0.209319	0.46125	0.782441	0.835969	0.374388	0.66859	0.0001	1.20253	0.540012	0.708534	0.440724
AP000487.6	0.0553489	0.0001	0.0001	0.0001	0.0001	0.0001	0.165901	0.104132	0.0574821	0.0779404	0.0001	0.0001	0.0392041	0.0001	0.343653	0.0001	0.0001	0.0001
AP000568.2	0.0566509	0.0001	0.0001	0.036869	0.0001	0.095936	0.0995808	0.0001	0.0689586	0.116861	0.0001	0.0001	0.0392041	0.0001	0.0001	0.118617	0.0001	0.109496
AP000580.1	0.706644	0.196663	0.000100007	0.110407	0.0001	0.380112	0.4079	0.15446	0.0554404	0.0390202	0.0001	0.245707	0.171976	0.0001	0.171876	0.180183	0.100257	0.0001
AP000620.1	0.0553489	0.0001	0.0001	0.147176	0.108219	0.133633	0.21845	0.22887	0.123046	0.133675	0.0001	0.0001	0.0398259	0.247717	0.0001	0.0597554	0.228614	0.533198
AP000640.10	0.276345	0.58979	0.124537	0.036869	0.0001	0.095936	0.132741	0.026108	0.103388	0.544983	0.549261	0.36851	0.273828	0.0001	0.171876	0.177875	0.0001	0.875269
AP000654.4	0.0001	0.0001	0.0001	0.0001	0.0001	0.0320453	0.0332603	0.026108	0.0796505	0.0001	0.0001	0.0001	0.0001	0.0001	0.171876	0.0001	0.0001	0.0001
AP000654.5	0.165847	0.196663	0.0623184	0.0736381	0.0001	0.095936	0.0001	0.026108	0.103388	0.194701	0.274681	0.122903	0.0783081	0.0001	0.171876	0.0001	0.400729	0.0001
AP000662.4	0.110598	0.0001	0.311192	0.0736381	0.149338	0.0320453	0.0332603	0.0001	0.0001	0.155781	0.0001	0.245707	0.0392041	0.247717	0.0001	0.0593583	0.0001	0.0001
AP000662.9	0.0001	0.0001	0.0001	0.110018	0.0132106	0.0001	0.0001	0.0302187	0.0527469	0.104279	0.0001	0.000104779	0.0001	0.0001	0.0001	0.0001	0.0001	0.0001
AP000692.10	0.0553489	0.393227	0.0001	0.0001	0.0001	0.0321668	0.0664205	0.026108	0.114864	0.116861	0.274681	0.0001	0.117412	0.0001	0.0001	0.0593583	0.0001	0.0001
AP000692.9	0.110598	0.196663	0.0623184	0.0001	0.149338	0.108645	0.0001	0.104132	0.154287	0.155781	0.13739	0.0001	0.0392041	0.0001	0.171876	0.163223	0.0001	0.109496
AP000695.1	0.933046	2.55542	1.55556	0.861687	0.597024	0.231324	0.530638	1.16502	0.573921	0.939145	2.8832	1.18506	1.01814	0.0001	1.54609	2.66672	3.30525	2.18802
AP000695.4	2.3758	1.17948	1.3689	0.698712	0.89553	0.839587	0.994908	1.37853	0.941167	1.82935	2.8832	1.96495	2.42455	1.20509	1.88964	2.78524	2.70435	3.39138
AP000695.6	3.14929	4.12793	3.54655	1.13994	1.49248	1.46959	2.02288	2.88699	2.0429	3.54184	2.74591	2.21056	4.06692	2.22866	5.49695	4.14818	6.51032	3.93836
AP000708.1	0.221096	0.0001	0.186755	0.036869	0.0001	0.0320453	0.0332603	0.0781241	0.0574821	0.0001	0.274681	0.0001	0.0392041	0.0001	0.0001	0.0001	0.0001	0.328289
AP000758.1	0.526136	0.322662	0.363592	0.341262	0.0788766	0.293764	0.100989	0.0087937	0.0613274	0.345301	0.158224	0.0184166	0.0972328	0.0001	0.000112528	0.000100002	0.000178819	0.0001
AP000783.1	0.663087	0.196663	0.124537	0.0736381	0.0001	0.223717	0.464344	0.13014	0.103388	0.739584	1.373	0.245707	0.430245	0.742952	0.171876	0.533425	0.400729	0.218892
AP000936.1	0.528423	0.681186	0.238417	0.198947	0.205467	0.107067	0.0341409	0.223913	0.107031	0.0404122	0.311119	0.0001	0.0807863	0.0001	0.0001	0.463733	0.517959	0.165567
AP000974.1	0.0001	0.393227	0.0001	0.0001	0.0001	0.0320453	0.0332603	0.0271175	0.0460057	0.0390202	0.0001	0.0001	0.0392041	0.0001	0.0001	0.0001	0.0001	0.0001
AP001007.1	0.463247	0.0001	0.096595	0.205229	0.0001	0.127881	0.0001	0.212602	0.0774852	0.162784	0.249856	0.196574	0.0001	0.0001	0.0001	0.0001	0.200414	0.0001
AP001046.5	0.110598	0.0001	0.311192	0.110407	0.149338	0.255663	0.530664	0.364212	0.378822	0.0390202	0.0001	0.0001	0.0783081	0.0001	0.0001	0.177875	0.100257	0.328289
AP001053.11	1.98906	2.94855	1.05781	0.036869	0.0001	0.095936	0.928588	0.26018	0.608351	3.2694	2.05945	1.59654	0.469349	0.247717	0.0001	2.07414	1.70277	0.765873
AP001055.6	0.0001	0.0001	0.0623184	0.183945	0.149338	0.0639907	0.165901	0.0521161	0.0345293	0.0779404	0.0001	0.0001	0.0392041	0.0001	0.171876	0.0001	0.100257	0.0001
AP001056.1	0.0001	0.0001	0.0001	0.147176	0.447815	0.159827	0.165901	0.0781241	0.080435	0.0001	0.0001	0.0001	0.117412	0.0001	0.0001	0.0001	0.100257	0.0001
AP001057.1	0.0553489	0.0001	0.0001	0.110407	0.447815	0.095936	0.265382	0.104132	0.16077	0.0779404	0.549261	0.0001	0.0001	0.0001	0.0001	0.0001	0.200414	0.109496
AP001058.3	0.0001	0.0001	0.0001	0.0001	0.0001	0.0639907	0.0001	0.0781241	0.0230529	0.0001	0.0001	0.0001	0.0392041	0.0001	0.0001	0.0593583	0.100257	0.0001
AP001062.7	1.18975	1.15252	2.73839	4.38591	3.59148	4.80533	4.49305	4.16654	4.7126	2.29673	3.869	1.70296	2.18352	0.759677	3.77757	4.51267	3.54897	2.93666
AP001062.8	0.0001	0.0001	0.00417654	0.179267	0.0986389	0.000912867	0.0001	0.00819458	0.0875244	0.0001	0.000561834	0.000100553	0.0001	0.0001	0.200986	0.0001	0.000100555	0.0001
AP001065.15	0.49734	0.196663	0.124537	0.0001	0.0001	0.0639907	0.331703	0.026108	0.080435	0.389302	0.274681	0.245707	0.0392041	0.0001	0.515429	0.118617	0.100257	0.0001
AP001065.7	0.165847	0.0001	0.0001	0.183945	0.0001	0.0320453	0.0664205	0.0001	0.0001	0.0390202	0.0001	0.0001	0.0001	0.247717	0.0001	0.0001	0.0001	0.0001
AP001189.4	1.32607	1.76917	1.24447	1.69148	1.49248	1.18208	1.62495	1.53457	1.19365	1.94611	3.02049	2.08776	1.09501	0.742952	1.20253	1.30378	1.4023	0.656477
AP001258.4	2.15481	2.75199	1.80443	1.43409	1.34325	1.82195	2.18868	1.6126	2.11176	4.20408	3.15778	2.57897	1.29053	1.23819	0.858982	1.54082	1.30214	1.53165
AP001372.2	2.4863	3.14511	1.55556	0.551636	0.597053	0.479029	0.795947	0.936389	0.617273	2.98255	1.78487	2.21056	0.703902	0.0001	0.687206	1.43002	1.00167	1.19748
AP001412.1	0.110598	0.0001	0.0001	0.0001	0.0001	0.0320453	0.0001	0.0001	0.0574821	0.0001	0.209448	0.0001	0.0001	0.0001	0.0001	0.0593583	0.0001	0.109496
AP001429.1	0.0553489	0.0001	0.0001	0.0736381	0.0001	0.0639907	0.0001	0.0781241	0.0115764	0.116861	0.13739	0.0001	0.0392041	0.0001	0.0001	0.0593583	0.0001	0.0001
AP001432.14	0.0553489	0.0001	0.124537	0.036869	0.0001	0.0320453	0.0995808	0.104132	0.0574821	0.0001	0.0001	0.0001	0.0392041	0.0001	0.171876	0.0001	0.100257	0.0001
AP001437.1	0.165847	0.0001	0.0001	0.0736381	0.298577	0.223717	0.0995808	0.026108	0.114864	0.467143	0.411971	0.0001	0.19562	0.0001	0.0001	0.0593583	0.200414	0.109496
AP001462.6	0.0553489	0.0001	0.124537	0.294252	0.0001	0.0639907	0.0664205	0.13014	0.0919114	0.0390202	0.274681	0.122903	0.0783081	0.0001	0.343653	0.0001	0.0001	0.0001
AP001469.5	0.0553489	0.0001	0.0001	0.0001	0.0001	0.0320453	0.0339601	0.104132	0.0460988	0.0390202	0.0001	0.0001	0.0001	0.0001	0.171876	0.0001	0.0001	0.0001
AP001469.7	0.0553489	0.0001	0.0001	0.036869	0.149338	0.0001	0.0332603	0.0521161	0.0345293	0.0001	0.13739	0.0001	0.0001	0.0001	0.171876	0.0001	0.200414	0.0001
AP001469.9	0.165847	0.0001	0.435629	0.40456	0.597053	0.223717	0.326098	0.811041	0.493873	0.908469	1.23571	1.10533	0.626084	0.495334	0.688327	0.533425	0.801358	1.09406
AP001596.6	0.110598	0.196663	0.0623184	0.0001	0.0001	0.0001	0.0001	0.0521161	0.0230529	0.155781	0.274681	0.122903	0.117412	0.0001	0.0001	0.0593583	0.0001	0.0001
AP001604.3	0.0001	0.0001	0.0001	0.0001	0.149338	0.0320453	0.0001	0.0521161	0.0689586	0.0001	0.0001	0.0001	0.0001	0.0001	0.0001	0.0001	0.0001	0.0001
AP001610.5	0.0588264	0.0001	0.0001	0.0370755	0.0001	0.0645865	0.338307	0.343196	0.0583765	0.0390202	0.0001	0.0001	0.0001	0.0001	0.0001	0.064079	0.0001	0.0001
AP001625.6	0.0001	0.0001	0.124537	0.036869	0.0001	0.127881	0.0332603	0.104132	0.0574821	0.0390202	0.0001	0.0001	0.0001	0.0001	0.0001	0.296391	0.0001	0.0001
AP001816.1	1.71282	0.982916	1.43112	1.36055	0.447815	0.607061	0.862267	0.572277	0.596874	1.51799	0.549261	0.73692	2.15082	0.495334	1.03076	0.7112	0.500886	0.875269
AP001877.1	0.276345	0.393227	0.311192	0.110407	0.149338	0.255663	0.398023	0.182156	0.309964	0.506063	0.13739	0.122903	0.0783081	0.0001	0.0001	0.118617	0.300572	0.109496
AP002381.2	0.221096	0.0001	0.0623184	0.514867	0.149338	0.095936	0.165901	0.156148	0.0919114	0.0390202	0.0001	0.0001	0.0001	0.0001	0.0001	0.118617	0.300572	0.218892
AP002414.1	0.0553489	0.0001	0.0001	0.110407	0.149338	0.0001	0.0001	0.104132	0.0001	0.0001	0.0001	0.0001	0.0001	0.247717	0.0001	0.0001	0.0001	0.218892
AP002954.3	0.0553489	0.0001	0.248973	0.257483	0.149338	0.223717	0.398023	0.364212	0.32144	0.311462	0.411971	0.245707	0.273828	0.247717	0.171876	0.177875	0.701201	0.547081
AP002954.3	0.0553489	0.0001	0.248973	0.257483	0.149338	0.223717	0.398023	0.364212	0.32144	0.311462	0.411971	0.245707	0.273828	0.247717	0.171876	0.177875	0.701201	0.547081
AP003068.18	0.949249	0.786353	0.447433	0.187701	0.0001	0.298907	0.635868	0.583694	0.769566	1.26666	0.274681	1.22813	0.556595	1.23819	1.03076	0.711198	1.62513	1.04506
AP003068.23	1.87856	0.786353	1.92887	1.61794	1.34325	1.56542	1.22703	1.87268	1.68714	1.71259	0.686551	1.84215	1.48605	0.990569	2.06142	2.1334	1.80293	1.85983
AP003068.9	1.86308	1.34407	0.546439	1.16285	0.257887	0.74855	0.693319	1.26514	1.11524	1.86327	1.10322	0.852054	0.986727	0.339748	0.0001	0.606916	0.14059	0.69379
AP003419.11	0.607785	0.0725098	0.350815	0.000111415	0.0026565	0.0336053	0.276992	0.334033	0.0322905	0.043245	0.000108125	0.00111221	0.0788609	1.50072	3.94419	0.00215593	0.316125	0.00597718
AP003733.1	0.0001	0.196663	0.0623184	0.478098	0.149338	0.255663	0.265382	0.364212	0.401775	0.194701	0.0001	0.0001	0.156516	0.495334	0.171876	0.0593583	0.200414	0.328289
AP004290.1	0.0565839	0.196663	0.311192	0.0001	0.0001	0.095936	0.0332603	0.0521161	0.0574821	0.0001	0.13739	0.0001	0.0392041	0.247717	0.0001	0.118617	0.100257	0.0001
AP005482.1	0.0553489	0.393227	0.0623184	0.183945	0.0001	0.095936	0.298542	0.0001	0.0230529	0.311462	0.0001	0.0001	0.0783081	0.0001	0.171876	0.0593583	0.0001	0.0001
AP006216.10	0.0553489	0.0001	0.0001	0.036869	0.0001	0.0001	0.0001	0.026108	0.0919114	0.0001	0.274681	0.0001	0.0392041	0.247717	0.0001	0.0001	0.100257	0.0001
AP006216.11	0.0553489	0.0001	0.0623184	0.0001	0.0001	0.127881	0.0995808	0.156148	0.0574821	0.155781	0.13739	0.245707	0.0783081	0.0001	0.171876	0.0593583	0.300572	0.218892
AP006222.2	0.557841	0.786353	0.78171	0.832978	1.85174	0.769898	0.844639	1.04333	0.553805	0.941515	2.05866	1.18942	0.296747	2.22958	1.07665	1.14269	0.747364	0.99161
AP006621.1	0.221096	0.0001	0.0623184	0.0001	0.149338	0.0320453	0.0001	0.156148	0.0689586	0.194701	0.0001	0.36851	0.352037	0.0001	0.171876	0.0593583	0.0001	0.218892
AP006621.5	0.552589	0.393227	0.311192	0.183945	0.0001	0.223717	0.398023	0.494253	0.332916	1.01203	0.961132	0.36851	0.156516	0.0001	0.343653	0.414908	0.200414	0.109496
AP006621.8	0.236028	0.0001	0.0001	0.0001	0.0001	0.0343093	0.036566	0.0001	0.047718	0.0406654	0.0001	0.0001	0.12245	0.0001	0.0001	0.0593583	0.0001	0.0001
AP1AR	19.1162	29.4846	24.203	18.4582	23.8782	20.3812	21.7864	23.0953	23.3778	28.1784	38.5787	37.3323	40.8248	38.3807	48.7845	41.303	39.7626	45.5087
AP1B1	166.41	161.182	143.725	91.8486	91.4831	103.981	128.629	112.432	124.215	156.108	137.153	130.049	90.0177	77.009	80.9068	133.627	116.483	114.757
AP1G1	115.194	115.186	130.845	145.568	164.61	155.733	130.949	130.612	131.152	118.006	126.307	132.627	135.222	126.037	141.887	133.508	142.724	148.561
AP1G2	17.1781	18.0928	15.7215	10.5147	9.56585	8.47075	11.0316	10.9268	9.3867	22.3945	20.2528	16.1363	9.95833	11.4657	10.1433	12.9448	7.38068	5.11388
AP1M1	60.2215	46.5856	44.9218	34.6365	53.129	45.8738	53.8855	50.4555	54.7546	48.6506	38.3041	40.5252	44.1877	36.3998	43.8031	51.792	53.3838	58.4177
AP1S1	44.8623	38.9196	42.3085	29.158	32.0863	29.3259	31.8008	26.0601	31.4799	53.2819	43.3838	45.683	36.9143	27.4856	36.5885	40.0587	31.3493	36.976
AP1S2	52.6523	60.9347	52.2013	45.8878	56.5614	48.9083	45.3302	46.5805	44.4483	48.2612	56.4264	49.4899	43.6011	40.3617	47.7539	45.4512	46.4731	43.4304
AP1S3	1.54707	1.76917	2.42662	1.91209	2.23867	3.25853	2.71924	3.95332	3.62666	3.2694	2.74591	3.5614	1.99441	1.4858	4.12273	2.42969	2.20356	4.15716
AP2A1	99.1394	96.6409	85.756	58.1875	64.4178	70.8587	73.7918	69.5314	73.8988	66.188	55.91	56.1191	46.5718	47.0473	44.0369	58.2267	54.8803	58.7273
AP2A2	109.448	104.768	82.7506	56.8448	52.532	49.803	57.268	57.6341	56.2578	148.52	128.778	123.786	83.2919	67.1044	85.8884	106.132	95.6502	97.3629
AP2B1	335.114	305.051	319.666	299.926	303.679	313.737	322.761	312.406	320.608	295.765	265.91	281.106	307.364	287.483	321.556	329.515	290.525	309.286
AP2B1	335.114	305.051	319.666	299.926	303.679	313.737	322.761	312.406	320.608	295.765	265.91	281.106	307.364	287.483	321.556	329.515	290.525	309.286
AP2M1	255.468	238.037	229.087	180.721	166.849	175.06	176.21	169.493	186.578	332.231	286.801	289.94	241.468	235.731	239.112	252.621	234.469	254.674
AP2S1	81.3265	81.5739	65.3294	39.7474	51.9351	60.824	59.1911	59.3505	61.8353	67.9162	56.701	56.6125	52.908	37.3903	45.6926	57.4214	61.697	61.9184
AP3B1	74.918	65.6522	77.5242	75.1917	59.6953	68.0115	67.5483	70.0127	67.6313	79.825	79.9027	80.3132	69.8407	68.3426	77.2994	85.9845	84.3321	80.2967
AP3B2	0.0001	0.0001	0.0001	0.0001	0.0001	0.0001	0.0332603	0.104132	0.0230529	0.0001	0.0001	0.0001	0.0783081	0.0001	0.343653	0.0001	0.0001	0.0001
AP3D1	182.597	175.924	165.188	237.421	203.412	200.904	178.539	182.441	186.811	172.377	158.845	169.345	197.44	250.093	206.647	195.791	231.964	238.266
AP3M1	89.7239	100.837	96.9373	100.047	88.6476	94.8777	92.8149	98.1544	95.0283	89.9057	95.9658	112.734	81.6494	84.4375	86.06	85.3312	106.267	107.537
AP3M2	14.9173	15.332	19.6611	5.111	6.11887	7.34753	9.05284	11.8337	13.5538	19.2267	21.0055	25.7888	10.2454	8.17147	15.6318	13.3925	14.3226	21.3324
AP3S1	56.8009	55.2326	55.0948	57.6002	59.7836	57.7976	56.9806	55.2063	55.0791	82.8028	68.4991	76.8248	71.0843	66.2255	71.4589	67.8456	66.6416	69.4297
AP3S2	27.1058	16.6011	19.728	21.5205	26.0977	22.3271	27.4992	23.4321	25.581	22.8815	14.896	12.0319	18.5189	13.5307	11.3792	15.532	16.0259	15.4774
AP4B1	20.8204	23.5136	18.1332	9.88883	14.5639	14.9901	14.3626	16.0683	16.8338	14.2626	17.0848	16.0951	10.5031	10.7455	15.7525	14.5218	14.7328	13.2231
AP4B1-AS1	0.395351	1.25362	0.968012	0.517011	1.4048	0.918872	0.427038	0.759065	0.897513	1.03324	1.17498	1.8344	0.720014	2.37837	1.25361	0.767001	0.491246	0.99863
AP4E1	16.9063	13.563	19.6611	9.96451	10.7453	14.2477	17.774	15.3448	15.4129	12.8049	13.4545	14.4909	11.1057	10.6476	9.96313	12.0888	11.6183	12.0337
AP4M1	15.0388	12.9793	15.5982	9.8217	13.533	10.7754	10.8476	12.6483	12.3162	11.5317	11.7753	10.8385	8.86198	10.8772	13.6555	9.24341	9.36039	10.9536
AP4S1	5.80123	6.87982	5.16423	3.93439	4.62649	4.02521	4.97414	3.19909	3.90945	6.81114	6.04087	5.40345	5.51377	3.21912	4.12273	4.68151	4.50717	4.59474
AP5B1	16.0775	10.9926	12.9415	6.47145	10.8945	8.49756	13.4632	13.4723	12.6126	8.56255	7.82565	8.10484	5.78715	5.6953	2.86443	9.06662	10.9161	7.00145
AP5M1	31.7683	36.1677	35.029	19.4877	27.1615	25.78	25.6329	25.8521	26.5795	53.4373	49.6992	50.3495	34.2943	32.1903	38.8216	43.792	35.5559	46.0558
AP5S1	12.9836	11.2042	7.09299	7.97898	7.61125	5.65443	9.08599	5.95593	7.86145	9.10743	6.31545	5.28065	7.07793	5.20006	4.98162	6.75555	5.40859	6.67327
AP5Z1	17.9007	18.8702	17.0479	15.9211	21.0427	27.2174	25.9978	25.9561	29.8845	19.8105	14.141	15.2277	15.6026	15.6	13.2269	26.9626	24.5386	22.2075
APAF1	38.9506	48.3547	49.3394	38.6048	45.667	50.6976	39.5604	39.7924	38.3888	34.4023	35.5583	39.6656	29.5237	26.2475	30.5763	42.0375	35.3556	36.5384
APBA1	9.00567	7.07638	7.96405	1.13994	1.19401	2.0446	1.02807	0.416228	1.03298	8.64039	5.90358	9.94717	2.81559	2.10953	3.09208	1.54082	1.10183	2.07863
APBA2	5.74599	9.43514	10.8883	2.79455	3.8803	6.80446	6.13475	7.07429	11.6601	9.49663	8.78668	13.3857	5.94392	5.6953	9.96313	11.4962	14.0221	16.4095
APBA3	9.61341	10.418	8.4618	13.6414	15.6701	17.8256	18.9014	17.6855	18.5797	11.4426	14.2783	9.94718	11.4967	13.8667	12.7116	16.3554	16.3257	16.9565
APBB1	43.8676	44.0303	29.2427	24.6354	27.9077	28.7509	24.9035	24.6817	24.9154	39.6208	29.3802	29.2273	26.9428	18.819	23.3617	28.8589	25.0394	24.1766
APBB2	112.598	121.476	139.494	156.71	132.375	188.35	189.578	141.561	189.341	119.485	154.314	171.925	149.026	155.008	189.126	155.376	158.749	196.147
APBB3	5.85841	6.69388	4.41761	2.24486	2.53828	2.68453	2.91821	3.17367	3.08882	11.2091	9.74771	7.61391	6.25675	5.20006	6.18407	5.92593	4.70749	3.28198
APC	70.6083	62.9004	66.5115	71.296	49.0995	55.1381	72.7869	54.1487	54.2149	64.0237	62.4673	69.7524	59.5165	55.2187	61.6678	70.8728	55.1868	60.1679
APC2	0.276344	0.196663	0.128133	0.152463	0.149338	0.482117	0.0995808	0.156148	0.161426	0.272541	0.554771	0.36851	0.0392041	0.0001	0.0001	0.118617	0.100257	0.218892
APCDD1	7.34821	7.4695	3.98208	2.20624	2.23868	0.798734	2.45396	2.41885	1.35432	13.5054	14.141	9.08755	4.30155	5.44768	2.06142	6.39999	8.31315	5.6887
APCDD1L	1.71282	2.1623	1.55556	1.28702	0.746292	0.926515	0.364863	1.01441	0.734591	4.67053	1.373	0.491314	2.50276	1.23819	0.343653	1.65933	1.00167	0.984666
APCDD1L-AS1	0.221096	0.0001	0.124537	0.0001	0.0001	0.0320453	0.0001	0.0521161	0.0230529	0.272541	0.13739	0.122903	0.234724	0.0001	0.171876	0.0593583	0.0001	0.0001
APEH	29.945	30.0743	16.7368	13.8988	15.5209	10.4462	19.2331	16.2811	14.2768	18.098	19.2207	14.9821	9.93253	7.181	7.90182	13.6295	11.9188	7.54843
APEX1	164.423	139.56	133.335	136.525	109.093	108.742	118.151	119.533	109.624	115.827	114.501	103.4	114.653	149.809	115.777	110.102	137.115	124.602
APEX2	34.6964	31.2537	31.1093	22.7969	18.6549	17.3784	23.8755	21.8468	23.7334	19.577	18.1224	17.1926	14.4295	16.3428	14.7729	18.9628	18.9298	17.0659
APH1A	127.782	136.502	117.177	77.034	122.973	114.49	115.641	127.346	129.856	134.386	117.369	122.519	122.548	85.5794	105.107	138.114	135.495	149.305
APH1A	127.782	136.502	117.177	77.034	122.973	114.49	115.641	127.346	129.856	134.386	117.369	122.519	122.548	85.5794	105.107	138.114	135.495	149.305
APH1B	24.3096	32.433	23.892	9.70712	13.2823	11.4365	11.6725	11.8858	12.3373	23.3133	24.5751	24.5608	13.1	10.4	17.8648	14.3999	16.9267	15.5344
API5	124.83	141.194	138.87	127.051	139.342	133.187	129.54	141.738	138.777	138.735	159.291	170.93	150.636	161.409	173.087	147.827	181.241	176.123
API5P1	6.82492	6.62233	8.70535	8.84613	5.40917	6.34841	7.26866	7.67516	7.26913	6.32017	9.71349	8.47946	8.16625	9.18283	10.1961	6.77865	9.35882	7.11512
API5P1	6.82492	6.62233	8.70535	8.84613	5.40917	6.34841	7.26866	7.67516	7.26913	6.32017	9.71349	8.47946	8.16625	9.18283	10.1961	6.77865	9.35882	7.11512
API5P2	0.49734	0.393227	0.130072	0.404559	0.306641	0.290424	0.607286	0.445109	0.313308	0.428222	0.0001	0.498178	0.430245	0.261533	0.174793	0.177875	0.601043	0.218892
APIP	12.039	13.3664	15.1712	13.1906	13.8734	12.7099	9.87782	11.2081	11.6097	9.96462	12.9054	11.1752	11.2616	10.6476	12.8833	10.9001	10.2161	10.9319
APITD1	6.51029	4.29222	5.15462	4.58081	3.41779	3.51409	4.96154	4.46198	4.53091	4.69235	4.39264	4.59468	3.99033	1.61286	2.55262	4.62392	3.60678	2.71501
APITD1-CORT	0.267594	0.228938	0.196359	0.346446	0.164127	0.0001	0.211667	0.245672	0.206806	0.172879	0.412717	0.563262	0.233114	1.11113	0.196007	0.116943	0.0859097	0.0200936
APLF	3.20454	3.53824	2.61327	9.30264	11.0437	9.13647	7.06325	6.5021	7.67787	3.69752	4.11881	4.54382	5.16184	6.68576	6.69938	3.5556	3.90623	2.8444
APLN	54.586	68.2076	115.477	12.7222	23.132	38.4943	12.402	6.97024	16.7327	47.1326	49.0126	89.0326	33.7469	34.9141	88.6367	19.6146	21.1333	62.2468
APLNR	0.0001	0.393227	0.0623184	0.294252	0.149338	0.0639907	0.431184	0.026108	0.0230529	0.895265	1.373	0.245707	0.469349	0.495334	0.343653	0.533425	0.500886	0.0001
APLP1	6.68522	2.94855	3.42211	4.33885	1.79096	2.396	3.01768	1.09244	1.6068	2.95804	1.23571	1.47374	2.54186	1.23819	1.20253	1.30378	1.00167	1.20346
APLP2	650.737	693.083	746.75	611.317	579.641	637.079	528.334	552.285	666.977	736.991	675.323	817.002	680.108	686.64	807.173	658.939	641.423	810.627
APMAP	90.8305	95.53	85.7993	68.4647	75.5149	80.789	77.4962	86.9697	87.7143	82.1598	67.9588	82.6464	70.5443	66.609	76.0971	78.2802	84.9334	87.4073
APOA1BP	73.702	60.7382	52.1388	32.4303	27.7584	33.5427	27.6558	19.9743	22.2758	72.6246	50.3856	49.6126	44.305	28.7237	32.2941	32.3552	22.7358	24.1766
APOB	0.442091	0.0001	0.435629	0.661943	0.149338	0.191772	0.596985	0.156148	0.114864	0.817424	0.549261	0.491314	0.899494	0.495334	0.171876	2.60747	0.801358	0.984666
APOBEC3B	6.83091	2.07443	0.571649	4.01175	2.82637	0.236953	3.37112	1.53062	0.244959	4.62689	2.56483	0.530346	3.58384	1.4858	0.212628	3.15738	1.34456	0.109496
APOBEC3C	20.1107	18.8702	15.4303	12.2442	11.9392	9.26425	9.64974	9.23295	9.34192	15.7239	13.18	12.526	8.40748	6.68577	5.8405	5.15557	4.30686	4.70414
APOBEC3D	4.16861	2.83985	3.5123	2.19661	1.64172	2.54929	3.35823	3.4715	4.23317	4.02261	2.33403	4.6276	0.600496	0.742952	0.687206	1.702	0.95926	1.96923
APOBEC3F	5.89324	6.42578	3.1649	5.86606	3.80707	4.24154	5.75338	6.47532	5.00936	4.48662	3.06427	4.15785	2.26814	0.742952	1.42359	2.24468	1.44501	1.60139
APOBEC3G	3.93648	3.99227	2.33318	7.70773	4.55047	5.62298	10.6967	8.081	8.12923	3.83187	4.2561	3.57896	1.68157	1.73342	1.79961	1.13324	1.55991	1.13372
APOBR	0.0651439	0.0001	0.0623184	0.220714	0.0001	0.0001	0.0001	0.0001	0.0115764	0.0001	0.0001	0.0001	0.0783081	0.0001	0.0001	0.0001	0.0001	0.0001
APOC1	0.276345	0.393227	0.248973	0.183945	0.447815	0.383444	0.298542	0.468244	0.241105	0.194701	0.411971	0.36851	0.0392041	0.0001	0.171876	0.0593583	0.801358	0.218892
APOD	2.54155	0.982916	0.435629	2.1327	1.19401	0.670952	1.75759	0.442236	0.952643	1.71259	0.274681	0.0001	1.40785	0.742952	0.343653	1.48156	0.601043	0.656477
APOE	2.3758	3.93137	2.55105	2.27978	4.62649	1.91682	1.22703	1.82066	1.53794	1.32339	1.64758	0.982527	1.29053	0.990569	1.03076	0.829716	0.901515	1.20346
APOL1	50.1662	44.4234	32.9136	78.4649	108.944	77.946	102.466	131.833	108.42	61.6885	49.9738	38.9288	34.568	28.2285	24.2206	34.7254	28.3446	26.474
APOL2	31.4368	37.1506	27.7495	153.4	202.515	161.009	76.998	94.5663	86.9819	36.0791	32.4006	37.3324	30.3448	46.7999	38.8216	41.9549	43.9692	41.6801
APOL3	37.4037	41.0818	26.2563	218.487	290.268	253.263	176.979	187.681	193.725	40.1268	34.7346	29.7185	67.6113	80.2281	63.2138	74.5473	67.0053	47.697
APOL4	2.15481	1.76917	0.684502	0.698712	0.597053	0.0639907	0.165901	0.156148	0.0230529	1.32339	0.961132	0.122903	0.743077	1.73342	0.343653	2.07414	0.901515	0.218892
APOL6	16.0223	16.1183	8.52402	78.4285	74.3208	75.1355	96.5296	82.5236	92.3624	29.5405	25.1242	20.1399	25.144	20.0571	19.5826	24.7701	15.3242	15.9719
APOLD1	3.97811	9.82836	8.39964	3.12591	8.35753	5.62368	2.22192	3.35528	2.83486	11.1315	12.4936	22.2591	27.2165	28.7238	49.6435	16.7702	28.0866	24.6144
APOM	0.55282	0.196663	0.249391	0.183957	1.34325	0.223717	0.166208	0.288301	0.184409	0.233621	0.549261	0.245707	0.0001	0.0001	0.171876	0.237878	0.100257	0.220332
APOM	0.55282	0.196663	0.249391	0.183957	1.34325	0.223717	0.166208	0.288301	0.184409	0.233621	0.549261	0.245707	0.0001	0.0001	0.171876	0.237878	0.100257	0.220332
APOM	0.55282	0.196663	0.249391	0.183957	1.34325	0.223717	0.166208	0.288301	0.184409	0.233621	0.549261	0.245707	0.0001	0.0001	0.171876	0.237878	0.100257	0.220332
APOM	0.55282	0.196663	0.249391	0.183957	1.34325	0.223717	0.166208	0.288301	0.184409	0.233621	0.549261	0.245707	0.0001	0.0001	0.171876	0.237878	0.100257	0.220332
APOM	0.55282	0.196663	0.249391	0.183957	1.34325	0.223717	0.166208	0.288301	0.184409	0.233621	0.549261	0.245707	0.0001	0.0001	0.171876	0.237878	0.100257	0.220332
APOM	0.55282	0.196663	0.249391	0.183957	1.34325	0.223717	0.166208	0.288301	0.184409	0.233621	0.549261	0.245707	0.0001	0.0001	0.171876	0.237878	0.100257	0.220332
APOM	0.55282	0.196663	0.249391	0.183957	1.34325	0.223717	0.166208	0.288301	0.184409	0.233621	0.549261	0.245707	0.0001	0.0001	0.171876	0.237878	0.100257	0.220332
APOO	4.58576	4.32449	3.67098	4.70654	4.47725	3.96132	6.30055	5.35775	4.94643	3.2694	2.74591	5.27599	4.53617	5.20006	5.32517	7.46664	5.70906	5.46991
APOOL	3.97802	3.34168	3.91986	3.97116	4.77573	3.00296	4.41042	4.91562	4.30376	2.84128	2.8832	3.6842	2.50276	2.97151	3.6074	3.73337	2.40387	3.28199
APOOP5	0.0001	0.0001	0.0001	0.183945	0.149338	0.0001	0.132741	0.0521161	0.0919114	0.0390202	0.0001	0.127557	0.117412	0.247717	0.0001	0.0593583	0.0001	0.0001
APOPT1	15.3742	19.22	17.2957	11.0766	14.8468	13.7866	14.6604	17.2736	15.6201	18.8596	15.07	14.6227	17.834	11.1545	12.1833	23.3345	26.5832	20.257
APP	1656.77	1799.95	1733.4	1424.02	1569.86	1474.45	1362.25	1779.43	1611.45	1427.22	1415.05	1480.84	1497.01	1531.52	1515.22	1668.78	1752.74	1716.16
APPBP2	74.0891	69.9766	70.4311	59.713	69.5452	70.4075	59.3903	59.7926	59.5401	96.2889	91.1609	100.207	77.7003	77.7519	85.5446	71.9989	75.6188	82.2659
APPL1	69.8347	86.8811	74.7867	64.5663	76.4102	63.8912	59.2245	64.8902	62.2824	89.6718	101.321	99.9621	86.7716	75.5234	91.9004	70.0436	74.7173	81.6096
APPL2	18.0665	19.853	16.9857	10.6264	14.327	10.3185	14.6569	15.787	13.0373	18.7986	20.4564	14.7365	17.4796	19.8095	22.1593	18.8443	19.7311	20.5666
APRT	26.7958	27.3224	27.5629	16.1785	18.3564	23.5758	21.9522	20.0523	27.6008	26.2324	14.0037	25.2976	18.4572	15.6	16.3189	21.5701	18.1286	23.6297
APTX	18.9505	14.3492	18.5412	16.0314	17.1625	15.7172	17.1108	19.09	18.569	12.1432	13.5918	16.3329	13.0609	14.8571	19.7544	13.4517	16.7264	15.0968
AQP1	319.307	381.907	136.801	61.7631	63.4264	25.9361	1.45963	3.78692	1.56326	486.311	345.403	258.497	63.0747	27.9276	20.0979	10.5247	5.50875	5.32033
AQP10	0.276345	0.0001	0.186755	0.0001	0.0001	0.0001	0.0332603	0.026108	0.0001	0.350382	0.0001	0.0001	0.0392041	0.0001	0.0001	0.0593583	0.100257	0.0001
AQP11	0.386842	0.0001	0.186755	0.331021	0.447815	0.191772	0.464344	0.208164	0.390299	0.506063	0.274681	0.73692	0.743077	0.247717	0.343653	0.474166	0.300572	0.437685
AQP3	1.27082	0.982916	0.746721	0.992864	0.447815	0.159827	0.232222	0.286188	0.126341	1.98503	0.13739	0.73692	1.21233	0.742952	0.687206	0.592683	0.100257	0.328289
AQP5	1.32607	0.58979	0.560065	0.36779	0.0001	0.159827	0.0664205	0.0001	0.0574821	0.194701	0.274681	0.36851	0.117412	0.0001	0.0001	0.118617	0.0001	0.0001
AQP7P3	0.0684457	0.0001	0.0623184	0.036869	0.0001	0.0320453	0.0664205	0.0342415	0.080435	0.0001	0.0001	0.122903	0.19562	0.0001	0.515429	0.0593583	0.100257	0.196789
AQPEP	0.386842	0.786353	0.497847	0.220714	0.298577	0.159827	0.364863	0.338204	0.332916	0.350382	0.13739	0.491314	0.352037	0.247717	0.0001	0.296391	0.400729	0.109496
AQR	54.2543	53.2687	61.9699	56.6614	56.7105	55.5214	57.6325	55.6567	54.8688	55.3449	55.7401	58.4547	57.835	55.714	61.4961	59.9692	66.6049	57.7611
AR	85.3043	50.7134	68.7516	25.334	14.327	17.8576	25.4672	13.3162	14.1391	69.5505	50.9348	62.0158	29.5237	18.5714	13.5704	26.6663	11.6183	11.8149
ARAF	41.9341	41.6715	36.46	25.7017	29.1016	27.0259	34.5863	30.9237	34.2571	34.6391	28.2819	30.8237	24.8312	26.4951	23.7052	30.3404	32.1506	35.6632
ARAP1	61.245	60.9359	53.3678	34.9962	33.5767	36.0986	46.513	39.4541	39.5937	71.9522	57.9282	60.176	33.5683	34.6696	34.5272	57.6876	44.5687	45.7887
ARAP1-AS2	0.22425	0.0001	0.0623184	0.183945	0.151354	0.0323115	0.100243	0.156791	0.115512	0.157281	0.138338	0.122903	0.0393522	0.742952	0.0001	0.119369	0.201796	0.328289
ARAP2	2.3758	0.58979	1.55556	4.26531	3.13411	2.90713	3.94617	1.6126	1.89371	2.14071	0.961132	1.47374	3.71499	2.22866	2.06142	2.48895	0.601043	0.437685
ARAP3	146.519	150.371	135.137	69.1995	59.6955	79.5429	96.9935	90.0916	100.751	104.111	100.359	103.155	61.1583	58.933	67.5082	114.132	98.8552	114.866
ARC	0.110598	0.393227	0.0001	0.0001	0.0001	0.095936	0.0001	0.026108	0.0460057	0.544983	0.823842	0.0001	0.19562	0.0001	0.343653	0.0593583	0.200414	0.109496
ARCN1	251.655	235.089	269.159	296.871	299.077	279.566	260.439	256.82	261.686	156.535	144.292	165.047	193.013	214.438	194.278	205.683	227.854	232.685
ARCN1	251.655	235.089	269.159	296.871	299.077	279.566	260.439	256.82	261.686	156.535	144.292	165.047	193.013	214.438	194.278	205.683	227.854	232.685
AREG	0.0553488	0.0964392	0.124536	0.0001	0.0001	0.031414	0.265382	0.121286	0.0574821	0.0001	0.0673885	0.180665	0.977547	0.742947	0.515428	0.551929	1.00166	0.875269
AREGB	0.000100111	0.100324	0.000100732	0.0001	0.0001	0.0326767	0.000100501	0.0609702	0.0001	0.0001	0.0701018	0.187946	0.000254203	0.000104368	0.000101031	0.574178	0.000110842	0.0001
AREL1	50.9366	49.534	61.0988	48.5351	62.0833	62.27	68.3442	73.863	76.915	32.4984	31.0277	30.7999	45.478	35.1617	48.6129	58.3104	64.7019	62.1372
ARF1	351.828	346.346	337.971	347.62	395.786	385.051	335.219	325.422	353.695	343.917	308.076	331.574	400.323	368.459	368.974	367.938	376.998	418.011
ARF1P2	0.331593	0.0001	0.0001	0.0001	0.0001	0.095936	0.0664205	0.0521161	0.126341	0.0001	0.411971	0.0001	0.0392041	0.0001	0.0001	0.118617	0.300572	0.218892
ARF3	193.208	173.566	170.105	232.137	234.154	219.755	249.165	246.538	229.679	137.662	129.032	126.164	154.697	134.003	126.592	174.042	179.767	151.952
ARF4	246.684	256.513	290.746	339.102	363.247	363.704	326.266	319.576	330.07	188.214	208.82	240.45	297.467	321.9	347.664	307.837	387.908	388.016
ARF5	55.3042	58.1828	44.7893	54.3812	43.727	42.8068	43.9708	42.101	46.9561	68.7719	58.8976	56.1214	59.2813	57.4472	50.6741	63.2283	49.925	58.3083
ARF6	52.7628	55.6275	55.9966	57.9481	62.2325	55.7447	51.9291	55.5793	56.9117	73.5982	61.918	62.3842	80.1634	76.2662	84.5141	75.7915	75.5187	79.4217
ARFGAP1	48.2877	58.1828	49.7126	55.9258	69.8436	76.7647	54.0844	55.6836	58.8394	48.7671	46.1296	57.2264	60.4553	62.152	62.5267	59.9104	70.9115	68.8102
ARFGAP2	48.2101	45.7993	42.6818	34.5261	42.8315	38.5899	39.5271	37.2152	40.0638	49.2039	51.0721	44.6454	38.3613	37.6379	35.2143	41.6828	38.6608	38.7993
ARFGAP3	46.6303	47.3719	52.2014	98.2102	128.494	101.395	69.9347	81.0148	71.8302	52.4647	55.7401	64.7175	90.0953	107.961	96.3667	54.4584	87.8381	77.4527
ARFGEF1	78.4043	74.1043	90.4038	90.6018	73.724	84.0487	89.3007	85.4624	84.7464	93.5761	92.4084	91.8571	96.1996	74.7806	107.532	105.42	89.7408	98.0193
ARFGEF2	87.0724	88.4536	82.9372	92.3639	97.3035	90.086	112.447	101.301	92.7411	63.9849	78.2556	68.5244	83.4091	66.3615	73.3486	75.3767	71.0116	66.8412
ARFIP1	28.1218	41.6715	35.9002	24.9662	35.0711	32.0732	31.2038	36.5415	32.4438	35.6898	40.0888	41.262	33.9032	37.1427	37.9627	35.6736	41.966	43.5398
ARFIP2	30.2765	27.7155	25.7585	27.2092	29.1016	28.4953	25.5998	27.3084	28.2664	16.9693	16.0631	17.3154	20.256	25.0094	22.1593	21.9257	25.8407	23.0827
ARFRP1	20.7184	18.6736	20.3455	22.0983	30.594	30.2204	32.6961	34.7209	34.4753	23.3911	24.1632	20.3855	26.5127	28.2285	25.7666	25.6589	31.75	32.4908
ARG2	13.208	11.884	12.9939	13.9217	17.5492	14.232	18.1185	22.7175	19.4345	21.3866	15.1702	24.0942	40.1106	34.0438	37.6253	47.2371	46.0834	43.4494
ARGLU1	60.0555	102.606	77.4618	67.4712	77.604	68.6828	63.5351	81.8212	73.6329	85.7806	124.248	115.804	95.5699	120.837	109.25	106.132	95.9509	89.8142
ARHGAP1	51.271	52.4825	41.8108	42.7992	48.5025	48.9725	59.1581	60.8068	58.4836	53.0095	47.5025	52.6827	46.612	51.9997	44.3184	52.3253	56.1883	59.8398
ARHGAP10	12.5416	12.9733	13.6259	8.30991	9.7006	10.3184	13.231	13.9144	14.3342	10.8978	11.9444	9.82437	8.17285	17.5809	13.7422	9.9555	13.0205	15.7531
ARHGAP11A	60.0039	59.5782	61.8204	54.9161	36.5835	47.6151	33.5791	27.4938	30.7074	54.9147	33.1497	57.3472	46.1947	43.2875	50.255	43.2646	26.7732	39.498
ARHGAP11B	7.56268	8.43294	6.88908	5.20147	2.5172	5.82952	6.63883	3.42874	4.98892	7.37232	7.21382	6.11635	4.83259	3.76	5.0573	5.89896	3.87509	3.71369
ARHGAP12	21.4919	22.998	24.2653	23.3852	21.0427	26.4828	32.4308	41.5608	33.3044	38.3754	45.9923	48.139	30.3448	30.7046	38.9933	44.0883	44.1695	43.6492
ARHGAP17	107.925	126.466	101.832	103.941	93.7115	85.2122	83.7558	83.7367	84.2775	122.538	120.814	119.844	117.306	131.22	124.362	95.5706	92.4292	102.499
ARHGAP18	101.216	63.49	99.3006	32.0259	16.7148	22.5216	39.1955	17.2434	27.6124	133.107	100.771	132.382	84.6213	52.495	94.8207	124.68	75.8191	104.802
ARHGAP19	29.8391	24.5705	30.2452	21.4186	22.5052	21.4299	22.0847	20.2915	21.0983	19.6593	16.11	18.4131	14.9495	14.2692	17.1712	20.2339	18.9276	17.3121
ARHGAP19-SLIT1	1.37678	0.000126909	0.0552565	0.370883	0.175939	0.293	0.298785	0.359081	0.190394	1.12293	1.87518	0.007599	0.535912	0.34046	0.00663929	0.682368	0.503103	0.957252
ARHGAP20	5.91173	12.187	5.4131	1.72824	1.79096	1.62931	2.55344	1.45655	1.49204	6.53869	10.9833	6.38588	1.05591	2.47627	2.40497	2.07414	1.80293	1.85983
ARHGAP21	113.907	125.805	121.2	127.296	109.206	108.642	113.017	123.13	109.972	108.581	125.142	122.977	142.049	152.683	142.611	118.705	115.153	111.406
ARHGAP22	13.9228	19.2633	15.5547	33.2761	31.1909	34.0219	30.806	35.9692	39.41	14.9454	13.7291	20.7539	23.6972	28.7237	27.4843	20.7998	35.1553	33.0377
ARHGAP23	121.098	122.205	90.5673	75.466	59.5428	61.7695	70.6471	53.9562	61.5367	142.451	119.148	106.688	88.2379	94.079	82.5697	86.0684	77.7112	84.611
ARHGAP23P1	1.67016	1.20243	0.440179	1.03473	0.0001	0.653266	0.6364	0.528589	0.439607	1.09585	0.981565	0.999797	0.668389	1.00522	0.717347	0.892568	0.502887	1.23171
ARHGAP23	121.098	122.205	90.5673	75.466	59.5428	61.7695	70.6471	53.9562	61.5367	142.451	119.148	106.688	88.2379	94.079	82.5697	86.0684	77.7112	84.611
ARHGAP24	50.7176	50.4075	62.4865	42.3472	33.5787	40.0996	46.512	46.3163	51.6498	54.478	51.3685	64.0153	74.147	67.0272	100.12	72.6533	55.5828	81.4318
ARHGAP25	0.442091	0.58979	0.0623184	0.294252	1.19401	0.670952	0.530664	0.468244	0.332916	2.45207	1.23571	1.59654	0.586661	0.0001	0.343653	1.12601	0.500886	0.547081
ARHGAP26	12.3206	16.708	15.1814	11.5823	15.8194	11.8838	24.2402	31.8859	28.4159	14.2449	18.2597	18.175	14.7814	28.2285	25.9383	25.0071	26.6419	26.4739
ARHGAP27	11.5471	17.2977	13.7504	6.72884	6.86506	8.65729	11.0093	10.0912	12.429	41.4113	38.1668	37.3324	20.4125	17.8285	17.5213	28.7997	25.8407	32.1626
ARHGAP28	48.7296	50.91	59.7915	73.023	72.0822	56.16	40.5217	29.5451	23.102	129.911	120.679	153.135	138.739	91.8661	116.293	157.924	98.6552	99.3315
ARHGAP29	336.076	302.51	413.875	210.833	164.162	232.816	235.533	168.506	213.263	454.682	398.553	514.542	593.052	369.445	643.125	603.46	475.747	592.5
ARHGAP30	0.0553489	0.0001	0.0623184	0.36779	0.0001	0.0639907	0.298542	0.13014	0.137817	0.116861	0.0001	0.0001	0.0783081	0.0001	0.0001	0.177875	0.200414	0.0001
ARHGAP31	141.051	132.484	125.557	174.91	186.1	169.342	194.286	204.605	188.363	132.796	129.465	123.663	140.345	145.847	139.311	181.864	167.163	144.184
ARHGAP31-AS1	0.110598	0.0001	0.0001	0.110407	0.0001	0.0001	0.0332603	0.0001	0.0345293	0.0001	0.0001	0.0001	0.0783081	0.247717	0.0001	0.0593583	0.0001	0.0001
ARHGAP32	9.22667	15.1355	11.3861	20.4437	21.6397	20.7326	11.0756	21.5867	17.0312	10.1972	13.7291	11.298	16.9713	22.7809	17.8649	13.2739	17.7279	14.331
ARHGAP33	3.48078	3.14511	3.60877	1.83855	2.08944	1.43764	2.05604	1.63861	2.238	6.26625	5.629	5.52625	2.50276	3.71436	1.88964	2.37043	1.10183	2.9538
ARHGAP35	122.376	98.4784	110.748	81.9215	73.5746	74.944	80.9773	66.2684	66.6092	124.351	93.9066	119.365	98.386	80.971	84.3423	101.806	80.4264	102.504
ARHGAP39	4.58576	4.32449	4.23095	4.33884	4.17877	3.8016	4.54306	5.20171	4.37262	7.00573	4.94255	5.03504	7.82091	7.181	5.32517	8.5333	8.51347	6.34508
ARHGAP4	11.6908	6.09356	7.02724	5.44889	1.49269	4.1906	2.48712	1.64149	2.33935	16.0749	10.7255	9.08663	7.93823	3.96205	6.18405	3.43708	2.20356	3.27489
ARHGAP40	0.0001	0.0001	0.0623184	0.036869	0.0001	0.0001	0.0001	0.234172	0.0460057	0.0001	0.13739	0.122903	0.0001	0.0001	0.0001	0.118617	0.0001	0.0001
ARHGAP42	6.02223	5.11075	6.71969	3.93439	2.53715	4.95163	5.23942	5.33175	6.18589	7.12249	11.5325	8.59634	6.21764	4.20959	11.5091	10.0147	7.81237	9.84576
ARHGAP44	6.24322	4.32449	0.622284	1.21348	1.34325	0.383444	1.59179	1.32651	0.573922	5.09865	3.29507	1.35094	1.36874	0.990569	0.0001	1.24452	0.400729	0.547081
ARHGAP4	11.6908	6.09356	7.02724	5.44889	1.49269	4.1906	2.48712	1.64149	2.33935	16.0749	10.7255	9.08663	7.93823	3.96205	6.18405	3.43708	2.20356	3.27489
ARHGAP5	54.5859	64.6695	66.4469	70.8497	65.2173	69.2732	72.785	66.8217	67.4	79.4347	72.6207	84.9801	91.346	82.7044	97.3119	91.6705	71.8116	81.2771
ARHGAP5-AS1	0.386842	0.196663	0.560065	0.110407	0.597053	0.173819	0.431184	0.435412	0.401775	0.428222	0.13739	0.614117	0.234724	0.247717	0.257368	0.829716	0.801358	0.437685
ARHGAP6	2.65205	3.14511	1.55556	5.80961	7.46202	2.87518	1.32651	4.18739	1.73304	1.47907	2.47133	2.57897	3.8323	6.93338	2.9203	0.592683	1.70277	0.656477
ARHGAP9	0.0001	0.0001	0.0001	0.882557	1.19401	0.447335	0.298542	0.26018	0.149294	0.0001	0.686551	0.0001	0.469349	0.0001	0.343653	0.0001	0.200414	0.0001
ARHGDIA	299.229	285.802	267.165	323.891	286.388	292.454	314.096	296.967	323.16	223.909	180.125	213.8	267.55	302.836	250.106	307.906	315.597	326.11
ARHGDIB	265.97	239.218	275.003	208.997	137.15	169.694	99.4484	78.2835	112.383	142.485	131.249	164.926	78.6769	102.018	104.956	88.6503	66.2039	95.7215
ARHGDIG	0.607838	1.76917	0.684502	0.296636	0.89553	0.575116	0.563825	0.780341	0.794555	1.05095	1.78487	1.47374	0.664869	1.73342	1.20292	0.829716	1.4023	1.20346
ARHGEF1	50.9949	44.4234	42.993	24.7089	24.6244	29.5494	39.6929	38.0238	41.0742	23.975	22.1038	24.9292	14.7814	14.1143	14.7729	24.4738	24.4385	24.3954
ARHGEF10	76.9616	65.2592	66.6981	53.536	52.0843	60.5365	62.3744	52.8225	56.4759	63.0114	64.5266	66.5595	46.2994	37.8855	52.5636	47.1105	44.1694	53.3854
ARHGEF10L	3.31503	4.12793	4.79091	1.98563	1.64172	4.31272	4.07881	5.72187	6.31214	3.54184	2.47132	5.77186	4.41886	6.93338	4.80984	6.34074	6.10969	6.78266
ARHGEF11	49.6686	47.1752	43.8018	33.2025	39.2499	37.7914	49.21	43.4853	46.227	41.7225	32.9498	32.2974	27.4512	24.019	27.6561	39.6439	34.8548	30.4122
ARHGEF12	294.774	266.219	316.898	248.328	247.209	254.919	240.2	230.412	216.594	288.139	304.492	327.259	283.766	236.226	292.365	302.044	241.277	271.957
ARHGEF15	63.4258	56.0207	54.1301	45.0421	36.5635	42.9029	64.5299	54.2529	58.4152	85.2749	94.5931	90.8746	88.6096	86.4185	84.5141	101.45	100.458	107.427
ARHGEF16	1.16033	0.58979	0.311192	0.661943	0.597053	0.830679	1.55863	1.9507	1.58385	1.05095	0.13739	0.982527	0.469349	0.495334	0.343653	0.35565	0.400729	0.0001
ARHGEF17	75.2332	83.103	79.1139	25.2444	23.2813	28.7542	35.9572	30.2688	34.4554	84.9801	94.2736	79.7423	44.4502	39.3569	42.3839	60.6634	50.7129	54.917
ARHGEF18	32.5969	37.1131	28.2464	18.0119	22.3858	26.8015	27.5548	31.86	34.0842	31.1751	25.0862	27.0152	27.2548	19.515	26.4537	36.1472	40.163	41.461
ARHGEF19	3.25979	3.73474	3.60876	3.27254	8.20821	3.99327	3.44877	5.01965	4.63658	4.70944	5.49171	7.3683	3.59767	2.72389	4.29451	3.31856	5.30843	4.70414
ARHGEF1	50.9949	44.4234	42.993	24.7089	24.6244	29.5494	39.6929	38.0238	41.0742	23.975	22.1038	24.9292	14.7814	14.1143	14.7729	24.4738	24.4385	24.3954
ARHGEF2	87.2939	81.7704	68.6271	78.7226	77.1562	72.2927	83.1983	78.2323	78.6947	88.4264	80.7268	79.3313	96.6259	85.9232	82.1092	103.524	78.7235	93.3147
ARHGEF25	6.57026	5.897	4.35539	3.74949	2.53715	2.26249	4.63711	3.35964	3.48488	5.92745	5.19808	3.05414	3.35318	3.46674	1.71786	2.70757	2.87989	2.18802
ARHGEF26	2.76255	1.96573	4.85313	0.77225	1.04477	0.734843	1.12755	0.780341	1.36579	3.54184	2.8832	4.29822	1.40785	1.4858	1.88964	2.1334	2.30372	2.29742
ARHGEF28	74.8071	76.8563	93.8879	39.0855	32.9818	54.4029	49.7736	35.3451	51.7008	77.7239	84.7082	91.2429	59.5946	80.4757	85.7165	53.9844	53.0835	78.1089
ARHGEF3	37.7904	52.4825	34.5313	21.1055	25.9676	23.1924	22.3501	25.488	23.6875	45.7313	43.5211	35.3675	28.7026	25.2571	26.1101	37.5699	36.1569	33.4754
ARHGEF33	0.31686	0.393227	0.384127	0.294252	0.149338	0.255663	0.165901	0.200335	0.169495	0.133395	0.0001	0.0001	0.0001	0.0001	0.0001	0.237133	0.0001	0.0001
ARHGEF34P	0.923073	1.81689	0.89888	0.421654	0.207989	0.661871	0.463991	0.480425	0.657586	0.401863	0.573393	0.000100038	0.315046	0.495334	0.0001	0.754873	0.557994	0.218892
ARHGEF35	0.451913	0.0001	0.528953	0.517862	0.424454	0.305816	0.729838	0.617537	0.445677	0.121504	0.203857	0.491314	0.0001	0.0001	0.224134	0.0001	0.143304	0.218892
ARHGEF37	15.6908	13.1698	15.4925	1.5444	0.89553	1.53348	2.52028	2.41885	3.31679	20.8224	22.1038	18.9118	5.90481	8.6667	11.3373	13.3925	12.019	14.331
ARHGEF38	0.11211	0.0001	0.0001	0.0370629	0.0001	0.0669669	0.0001	0.0861016	0.0697252	0.0693167	0.13739	0.0001	0.0399704	0.0001	0.0001	0.22001	0.0001	0.0001
ARHGEF39	2.19793	2.48431	1.77401	1.3305	1.73465	0.763458	1.45097	1.19521	1.34257	4.14514	2.74626	1.10548	1.18645	1.15841	2.08636	0.926131	0.634286	1.35755
ARHGEF40	25.9257	14.9389	16.488	37.5272	22.8191	38.001	40.5908	17.4346	30.4254	15.973	8.5121	12.0348	12.5578	7.181	12.1962	15.4665	8.91409	10.5511
ARHGEF5	2.21649	1.52489	1.31008	0.494777	0.412525	1.17295	0.630286	0.878949	1.77762	0.878061	0.184082	0.73692	0.154403	0.0001	1.66561	0.311977	0.000102947	0.0001
ARHGEF6	25.4147	23.7843	23.9542	14.6342	10.2975	11.9477	13.5958	11.4436	11.052	37.8307	29.6548	27.2624	25.0659	22.5333	16.8342	19.9701	9.61519	14.5498
ARHGEF7	102.874	100.051	94.8833	95.6732	101.482	103.088	103.262	97.8173	94.7045	141.125	122.6	136.067	167.212	134.704	182.598	182.991	153.342	167.596
ARHGEF9	16.851	12.7767	13.6881	4.33885	5.22344	6.26138	5.83631	5.20171	5.41699	12.6492	9.33584	9.21036	4.14513	2.22866	5.8405	5.27409	4.40702	6.12629
ARHGEF9	16.851	12.7767	13.6881	4.33885	5.22344	6.26138	5.83631	5.20171	5.41699	12.6492	9.33584	9.21036	4.14513	2.22866	5.8405	5.27409	4.40702	6.12629
ARID1A	93.3706	64.2763	82.813	87.1073	60.2924	63.092	76.4676	70.3772	62.4769	89.9837	79.4913	75.8927	94.0451	86.6661	83.14	99.1396	75.118	74.9365
ARID1B	87.6796	77.6425	78.7688	80.892	61.6355	75.7433	65.359	59.7924	62.1771	89.9061	89.376	82.647	83.9179	75.7709	78.5019	79.4654	67.9067	68.1538
ARID2	35.5252	36.3643	37.7043	40.4094	29.8478	29.805	36.2111	33.0562	29.6778	40.4382	41.8737	42.4901	46.8467	40.1141	44.8337	50.4288	44.7704	36.429
ARID3A	6.85096	8.05919	7.09299	6.06699	5.8204	6.35722	12.1036	11.2096	11.7864	6.03273	4.94255	7.3683	5.12273	7.42862	5.15339	7.34813	9.81551	11.4867
ARID3B	9.73236	8.91465	6.52025	17.5797	20.0957	16.2265	11.9386	17.0306	13.7181	11.5289	9.57326	10.2619	14.1181	25.397	18.4941	14.9375	18.5345	18.0085
ARID4A	34.0334	36.7574	30.7359	33.754	20.1473	23.6077	28.8164	23.8755	23.653	40.7881	39.677	38.4375	24.2446	28.2285	23.7052	28.3849	23.8375	21.223
ARID4B	77.0582	80.9259	82.4603	125.006	108.588	102.308	96.6308	91.9892	88.8888	93.9694	97.3626	99.7617	111.18	118.84	113.393	104.794	92.9135	89.2302
ARID4B-IT1	0.110598	0.0001	0.0001	0.0001	0.0001	0.0320453	0.0001	0.0001	0.0460057	0.0001	0.13739	0.0001	0.0392041	0.0001	0.0001	0.0001	0.100257	0.0001
ARID5A	15.3593	16.5114	12.5682	29.5257	30.2955	29.0064	42.4784	48.6614	39.3876	17.2807	11.5325	13.7541	35.1545	32.9332	26.2819	41.5402	31.5497	29.4277
ARID5B	56.6304	30.4674	38.6999	88.6863	86.26	60.2491	58.5946	42.5754	31.8245	38.1807	22.1038	27.9993	46.1821	53.9807	33.4965	42.9032	22.5355	26.474
ARIH1	88.896	88.7308	86.617	119.283	106.968	95.8482	96.4997	101.209	89.2189	78.1669	81.688	72.0373	100.195	100.244	89.3239	86.1512	79.2393	72.092
ARIH2	60.3588	61.8821	67.0679	46.979	54.7591	53.9232	60.6134	73.6284	68.5861	51.3666	53.7978	55.5072	49.1113	58.917	57.7057	62.8027	74.7146	75.9047
ARIH2OS	0.443173	0.786353	0.37341	0.221108	1.04477	0.0964529	0.26579	0.26018	0.264546	0.312758	0.0001	0.122903	0.0392938	0.495334	0.0001	0.420854	0.101569	0.218892
ARIH2P1	0.830839	1.37604	1.43464	1.225	1.65331	0.990406	0.964515	0.962397	0.919455	1.1746	1.23571	0.245707	0.743077	0.758897	1.37431	1.12601	1.4023	1.20346
ARL1	69.2823	84.3257	83.5593	106.594	116.108	108.2	104.389	115.398	104.975	61.0659	80.3149	85.3486	80.985	103.999	107.017	73.5989	104.865	98.8942
ARL10	59.3374	69.3869	61.3474	58.3911	68.6497	69.034	57.8365	67.751	63.591	80.6817	89.2388	86.5765	102.558	86.1709	92.7594	98.6652	98.9555	98.2379
ARL11	0.0001	0.0001	0.0001	0.0001	0.0001	0.0001	0.0332603	0.0001	0.0001	0.0779404	0.0001	0.0001	0.0001	0.0001	0.343653	0.237133	0.200414	0.109496
ARL13B	11.6024	16.5114	15.1192	19.8922	28.2061	20.9882	15.3865	22.211	20.5658	8.83498	11.2579	16.3329	14.7814	23.5237	20.2697	11.3777	18.2287	17.9411
ARL14EP	19.7792	24.7671	22.2743	20.2821	33.2803	26.5786	24.0744	33.5474	30.3163	19.6498	23.614	23.7011	18.8092	30.9522	30.061	19.4832	30.4479	29.8653
ARL14EPL	0.0745262	0.0001	0.124537	1.80178	1.79096	0.734836	0.398023	0.207592	0.206676	0.0779404	0.0001	0.0001	1.72068	0.247717	0.0001	0.948233	0.0001	0.0001
ARL15	17.4587	17.8874	18.9767	8.1996	10.1483	10.3823	9.11917	9.36299	8.09098	11.3648	13.0427	13.1401	5.67019	4.45721	9.61958	10.9629	9.51503	9.95515
ARL16	18.7295	18.6736	19.1634	13.862	12.8346	17.2422	14.458	16.5165	16.1106	16.5295	17.7105	19.2022	14.8501	19.3142	22.1593	20.5642	21.2334	20.8948
ARL17A	14.5196	17.9752	12.526	8.96359	12.1611	10.239	10.613	10.4872	9.65911	12.2895	13.8716	12.8239	7.43735	7.31142	7.61848	9.64524	7.8276	8.3279
ARL17A	14.5196	17.9752	12.526	8.96359	12.1611	10.239	10.613	10.4872	9.65911	12.2895	13.8716	12.8239	7.43735	7.31142	7.61848	9.64524	7.8276	8.3279
ARL17B	1.73462	1.09161	0.422143	1.24035	0.673589	0.678422	0.529985	1.01855	0.72909	1.11365	1.36779	1.17589	1.1127	1.85062	0.970542	1.19923	0.886283	1.18977
ARL2	41.7383	34.4924	30.3173	26.8702	27.2663	24.5292	24.0849	24.054	24.3354	30.9301	24.5572	20.0063	23.3452	22.4145	15.9617	19.2148	21.588	17.7427
ARL2BP	110.497	118.528	120.083	136.41	150.581	151.357	141.758	169.727	155.449	140.422	116.972	142.698	124.822	120.343	127.974	138.427	134.412	137.511
ARL3	13.8676	14.1527	14.6214	11.7662	8.65592	12.4268	11.4404	11.2356	12.9455	12.6102	8.78668	14.6137	7.54719	5.20006	8.58892	12.7999	12.2193	14.0028
ARL4A	100.708	149.978	109.75	35.471	48.204	42.8061	49.4064	68.756	56.9197	93.8648	118.344	90.9832	38.944	48.5187	34.5271	52.3844	63.4901	40.796
ARL4C	9.28191	7.07638	6.4086	8.45699	5.37268	10.7657	8.4228	8.06258	10.8799	3.69752	2.74591	2.70177	7.58628	6.68577	8.58892	9.89625	7.01111	11.1585
ARL4D	4.14377	7.4695	2.86215	1.32379	0.89553	1.66126	2.88504	2.41885	2.42163	5.44893	5.49171	3.5614	1.56426	1.23819	0.858982	1.95562	2.40387	2.40682
ARL4P	0.0553489	0.0001	0.0001	0.0001	0.0001	0.0320453	0.0332603	0.026108	0.0001	0.0390202	0.13739	0.0001	0.0001	0.0001	0.171876	0.118617	0.0001	0.109496
ARL5A	113.475	145.85	167.865	50.3738	61.7848	59.9921	57.6319	52.9262	55.1551	103.76	117.383	133.979	94.0451	74.0376	106.845	81.5394	89.6408	84.5607
ARL5AP4	0.442091	0.0001	0.0623184	0.036869	0.149338	0.0639907	0.132741	0.182156	0.0689586	0.155781	0.13739	0.0001	0.19562	0.0001	0.0001	0.177875	0.200414	0.0001
ARL5B	78.2325	105.555	115.54	148.988	200.427	163.816	98.055	114.487	101.635	110.066	126.033	139.382	196.146	204.284	226.23	144.887	170.568	165.188
ARL5B-AS1	0.0553489	0.393227	0.0001	0.147176	0.0001	0.281629	0.0001	0.0781241	0.0692055	0.216999	0.13739	0.122903	0.0428375	0.247717	0.171876	0.378298	0.100257	0.218892
ARL5C	0.110598	0.0001	0.0001	0.0001	0.0001	0.0320453	0.0664205	0.026108	0.0001	0.194701	0.0001	0.245707	0.0783081	0.0001	0.0001	0.237133	0.0001	0.0001
ARL6	3.25979	3.34168	3.17324	1.5444	1.34325	2.77934	3.44877	2.75695	3.1676	3.81428	3.98152	2.33336	2.15082	1.73342	3.26385	3.14079	4.40702	3.93836
ARL6IP1	321.657	333.165	302.544	182.451	224.551	207.776	140.091	135.769	132.56	367.319	302.31	300.421	283.165	189.675	243.92	224.428	199.404	202.82
ARL6IP1P2	1.38633	0.58979	0.499588	0.442079	0.451581	0.383945	0.266184	0.182156	0.195271	0.819625	0.827036	0.491314	0.509047	0.247717	0.861549	0.178877	1.01021	0.438693
ARL6IP1P3	0.165847	0.0001	0.0001	0.036869	0.0001	0.095936	0.165901	0.0521161	0.0345293	0.0779404	0.0001	0.122903	0.0783081	0.0001	0.0001	0.237133	0.100257	0.0001
ARL6IP4	106.859	87.5804	71.9917	106.835	74.0324	67.6497	98.5308	86.4646	85.4211	88.2531	76.9687	73.5605	72.9116	85.4712	60.7879	91.609	95.0005	85.8132
ARL6IP5	202.819	181.035	186.406	133.435	110.436	124.97	146.005	122.29	148.036	199.661	194.129	180.275	133.775	132.475	142.059	192.59	184.49	187.615
ARL6IP6	17.2378	23.5877	19.4122	13.4208	17.461	15.4297	13.0984	13.0041	14.9195	20.3553	22.1038	21.2451	19.3957	14.8571	22.6746	16.8887	20.0315	19.3632
ARL8A	27.735	33.2193	24.9492	34.6716	26.5636	29.453	31.2695	26.8142	27.6235	34.7944	29.1056	34.6287	43.2882	44.076	41.0543	40.1772	36.1568	40.0386
ARL8B	82.6527	87.6675	96.9993	99.4609	121.481	110.626	97.1589	112.898	112.745	83.7561	86.4929	94.313	92.4427	96.571	106.845	94.2794	105.065	105.567
ARL9	0.221096	0.58979	0.0001	0.698712	0.597053	0.511225	0.464344	0.364212	0.275534	0.272541	0.13739	0.122903	0.743077	0.495334	1.20253	0.770458	0.400729	0.984666
ARMC1	47.459	55.6275	54.9389	40.4828	47.3086	47.6945	45.3966	47.1787	50.1523	43.5518	49.15	55.016	43.7185	36.3998	54.4532	42.5476	49.0772	49.8848
ARMC10	29.0754	39.8852	32.4811	17.9805	21.2863	19.9574	22.1572	27.2651	25.566	33.1331	38.0915	30.2828	26.5704	25.4563	26.9067	22.9386	32.374	29.1654
ARMC10P1	3.46642	1.19669	2.29917	1.54403	2.44284	1.98921	1.91741	1.68207	2.1728	2.67364	2.95843	2.5059	3.18802	1.53414	1.26487	1.53526	1.67964	2.45031
ARMC12	0.442091	0.393227	0.124537	0.036869	0.0001	0.095936	0.0664205	0.234172	0.137817	0.272541	0.0001	0.245707	0.0783081	0.0001	0.171876	0.0001	0.0001	0.0001
ARMC2	1.43657	1.17948	0.871157	1.25025	0.298577	1.08624	1.32651	0.806349	0.952644	1.16771	1.09842	1.10533	0.977702	0.495334	2.06142	0.592683	1.10183	1.20346
ARMC4	2.3758	1.57261	2.55105	0.588405	0.447815	1.75709	0.928588	0.832357	1.40022	1.82935	3.02049	3.807	0.86039	0.00175234	1.54609	0.829716	1.60262	2.07863
ARMC5	12.4342	14.5466	12.4036	12.6965	14.3617	14.8655	11.736	13.4184	13.1183	11.6842	11.5677	12.1332	16.5015	16.5012	11.9077	13.9454	14.8187	12.3316
ARMC6	19.6419	24.7671	22.3612	11.2358	20.399	19.436	18.3675	18.259	21.0499	12.3741	11.6941	18.4206	16.747	13.619	17.6931	17.1808	19.6309	19.1183
ARMC7	14.5306	14.7423	12.1327	4.30208	5.96963	7.06002	7.85908	8.66077	8.55003	19.7326	14.5529	18.2978	7.86002	8.17147	8.7607	11.4962	13.2209	15.5344
ARMC8	35.9119	34.2021	34.7802	26.9518	36.4143	30.0607	28.2858	38.9341	35.1525	27.4778	26.6344	31.6834	29.4063	31.6951	34.8707	26.9034	32.5512	35.2257
ARMC9	15.5803	15.7252	16.488	11.472	11.193	14.5352	19.9625	18.2838	21.2889	14.2449	12.6308	15.2277	8.05554	8.41909	7.55826	13.0962	11.5182	12.5807
ARMCX1	24.5859	35.5781	25.3852	35.2248	46.5625	39.229	29.0153	31.964	29.483	31.3309	34.46	27.5081	32.9257	35.4094	42.4289	28.6811	34.4542	25.8176
ARMCX1	24.5859	35.5781	25.3852	35.2248	46.5625	39.229	29.0153	31.964	29.483	31.3309	34.46	27.5081	32.9257	35.4094	42.4289	28.6811	34.4542	25.8176
ARMCX2	114.807	91.2056	90.9634	290.657	287.734	158.382	235.239	213.891	126.144	110.688	81.9626	77.6117	450.441	221.617	174.181	333.449	235.772	150.967
ARMCX2	114.807	91.2056	90.9634	290.657	287.734	158.382	235.239	213.891	126.144	110.688	81.9626	77.6117	450.441	221.617	174.181	333.449	235.772	150.967
ARMCX3	117.281	123.638	113.734	224.253	244.751	181.805	154.888	165.486	131.242	139.45	134.13	138.522	260.232	224.093	209.912	185.774	211.332	175.799
ARMCX3	117.281	123.638	113.734	224.253	244.751	181.805	154.888	165.486	131.242	139.45	134.13	138.522	260.232	224.093	209.912	185.774	211.332	175.799
ARMCX4	26.9063	25.1602	26.6918	26.7312	25.2214	30.3801	23.2123	19.2721	19.6707	23.469	24.9869	24.9292	16.7757	10.8953	20.785	22.9331	17.0268	21.1136
ARMCX4	26.9063	25.1602	26.6918	26.7312	25.2214	30.3801	23.2123	19.2721	19.6707	23.469	24.9869	24.9292	16.7757	10.8953	20.785	22.9331	17.0268	21.1136
ARMCX5	15.0174	13.1751	12.5357	11.9985	14.1903	11.9151	14.2085	14.0514	12.7086	11.8	10.77	10.6443	12.8683	13.2335	11.0329	13.8997	11.9327	12.2519
ARMCX6	50.8264	48.9475	40.8823	51.9152	53.3998	37.8643	46.1285	39.861	37.6625	53.2024	46.8861	44.3469	57.3127	52.2474	40.3676	54.8564	43.1225	38.52
ARMCX6	50.8264	48.9475	40.8823	51.9152	53.3998	37.8643	46.1285	39.861	37.6625	53.2024	46.8861	44.3469	57.3127	52.2474	40.3676	54.8564	43.1225	38.52
ARNT	51.5474	46.7822	43.8018	56.073	51.9351	47.5668	43.9704	44.8902	38.8247	46.0814	41.0499	37.7008	41.4113	41.8474	45.349	40.1179	38.8611	35.2257
ARNT2	1.93381	0.786353	0.248973	5.33161	5.22344	2.396	5.43838	4.49949	2.06586	0.622823	0.0001	0.122903	2.65918	2.97151	0.687206	3.61486	3.00482	1.53165
ARNTL	6.62997	5.897	6.47081	7.7216	5.0742	6.80446	8.92022	7.75049	7.6434	5.60461	8.5121	6.99989	6.80421	7.42862	8.58892	8.17774	6.00953	6.45447
ARNTL2	44.9174	46.7821	48.5306	90.3421	158.491	124.938	131.216	201.148	160.148	63.362	63.5655	76.7521	93.85	118.361	144.979	115.614	156.646	147.029
ARPC1A	130.54	121.311	117.532	98.4617	108.219	113.722	107.569	117.225	118.68	167.466	168.232	179.276	150.262	144.669	164.756	154.385	169.124	188.855
ARPC1B	109.957	124.59	103.905	65.8966	90.2677	86.035	112.649	111.177	120.442	144.164	133.394	141.612	124.526	101.215	113.007	141.787	129.543	152.789
ARPC2	277.847	248.848	257.522	336.19	300.714	298.344	344.666	317.904	327.616	305.176	267.029	296.079	305.592	281.293	323.109	338.836	312.592	346.129
ARPC3	128.107	108.477	115.075	113.405	107.948	111.064	138.582	135.704	139.303	113.812	110.886	118.359	103.711	103.081	117.234	133.933	133.459	138.146
ARPC3P1	4.75654	4.03677	3.93176	4.40667	3.03288	3.68826	5.18716	4.51008	5.03199	3.87035	3.83716	3.99433	3.81827	2.47627	5.46424	4.37877	4.45426	5.21744
ARPC3P5	0.408656	0.0001	0.311192	0.298914	0.15013	0.436457	0.23667	0.313519	0.457598	0.280413	0.566902	0.36851	0.245033	0.0001	0.171876	0.425382	0.322428	0.446288
ARPC4	87.9282	80.2342	78.3015	56.7016	67.5632	73.802	86.0139	82.5962	92.936	91.7074	74.5438	78.5255	79.4961	58.4114	80.5823	104.343	98.1514	106.919
ARPC4-TTLL3	5.38792	5.11206	5.36244	3.46681	3.16623	3.88955	3.8475	3.88888	4.5258	5.17409	3.98622	5.72941	2.52145	2.70176	5.17547	6.09188	6.5757	3.15749
ARPC5	174.533	173.368	197.171	158.364	181.024	199.62	203.035	193	210.435	243.828	208.681	251.996	241.311	156.247	237.564	234.786	210.43	258.501
ARPC5L	34.3098	32.6296	40.8777	29.342	36.862	36.1625	34.5201	37.6076	39.6044	37.1687	35.9701	44.7006	45.2046	50.7617	48.441	50.3699	61.4965	57.7614
ARPP19	276.239	315.482	326.018	242.299	257.735	266.461	233.575	229.707	251.144	405.561	396.894	465.794	411.524	330.565	448.51	381.249	366.073	427.187
ARRB1	92.8735	119.904	81.1329	88.6495	96.4082	103.664	123.124	114.981	118.447	119.446	137.153	125.628	83.7612	86.1709	98.9431	116.383	131.406	121.32
ARRB2	15.1383	10.8111	10.2661	8.08929	4.62649	6.80446	7.428	3.66723	6.622	13.4665	11.2579	11.298	7.97733	8.17147	6.35583	8.5333	7.41174	8.533
ARRDC1	9.6134	12.3836	8.71067	5.07423	4.02953	6.1975	6.89744	8.37468	8.36642	15.3347	11.8071	11.912	7.46898	7.92385	8.24537	9.24439	10.5166	9.73636
ARRDC2	21.8787	30.2709	16.1147	11.5088	10.4468	10.4462	12.9326	15.3968	13.5309	30.0074	28.831	24.8064	23.0715	24.5142	17.1777	21.2146	25.1396	17.5035
ARRDC3	77.4592	73.9079	75.16	48.1675	43.2792	44.9792	54.5818	72.8224	73.2418	92.6299	99.6729	108.313	118.369	110.19	118.182	72.0582	87.7378	69.2478
ARRDC4	16.7958	15.332	11.3861	10.6631	8.9544	6.45306	10.2798	10.3513	8.09098	23.5468	20.1818	11.7892	14.0384	9.40956	6.01227	5.80741	5.60891	4.59474
ARSA	8.50843	13.7595	12.3193	2.6107	5.96963	8.01838	6.23423	7.41239	8.72217	10.1972	10.1596	12.2804	6.21764	4.20959	9.27603	6.63703	5.60891	7.11085
ARSB	65.3596	73.5147	75.1599	39.8211	49.6965	52.1667	41.1852	38.05	42.0729	75.9334	68.6452	79.8223	57.2875	48.0378	56.5146	61.9251	46.1725	50.1035
ARSD	47.4036	52.8757	36.8334	21.1231	29.4	27.7287	31.0713	35.4751	36.9539	32.0315	30.0667	26.0344	17.7142	15.1048	20.785	19.3776	20.6325	19.035
ARSD-AS1	0.000100352	0.0001	0.0001	0.386967	0.0001	0.0001	0.0001	0.0001	0.0001	0.0001	0.0001	0.0001	0.0001	0.0001	0.0001	0.0001	0.000100002	0.0001
ARSE	2.7073	1.76917	1.99109	0.625174	0.149338	1.0543	0.596985	0.312196	0.573922	3.03588	1.09842	1.84215	0.938598	0.247717	0.858982	0.888974	0.500886	0.656477
ARSG	7.63257	9.14048	7.50413	6.31667	6.45566	5.8531	2.90176	4.23362	3.99987	5.34648	6.86168	5.10578	4.8635	7.27082	5.96398	1.74228	3.22756	5.0613
ARSG	7.63257	9.14048	7.50413	6.31667	6.45566	5.8531	2.90176	4.23362	3.99987	5.34648	6.86168	5.10578	4.8635	7.27082	5.96398	1.74228	3.22756	5.0613
ARSI	0.49734	0.0001	0.124537	0.0736381	0.149338	0.0320453	0.232222	0.0521161	0.0460057	0.0779404	0.274681	0.0001	0.0001	0.0001	0.0001	0.0001	0.0001	0.0001
ARSJ	57.0168	44.8166	53.508	107.291	92.8266	101.49	103.097	97.6866	109.333	64.9578	50.7975	69.9979	168.185	157.98	184.832	128.887	145.129	175.252
ARSK	6.85096	9.82826	8.02627	3.34608	6.41735	3.92938	4.1783	4.94163	5.39402	8.29012	10.5715	9.33316	4.30155	3.71436	4.63806	6.57777	7.31158	7.87662
ART3	0.165847	0.0001	0.0623184	0.661943	0.149338	0.351499	0.994908	0.676309	0.757545	0.0390202	0.0001	0.0001	0.117412	0.0001	0.343653	0.237133	0.601043	0.328289
ART4	154.862	124.621	115.353	104.644	77.9024	78.4579	167.791	182.08	147.669	69.0838	77.02	51.7003	35.3893	35.1617	28.6867	52.6215	57.8909	32.6002
ARV1	10.6079	13.3664	10.7017	5.44191	5.96963	3.99327	5.47155	6.55413	5.11859	10.8978	10.5715	8.22793	6.10033	6.93338	4.12273	6.39999	7.81237	6.34508
ARVCF	43.6467	36.5609	41.8108	13.5311	17.7595	22.298	21.488	15.761	20.9675	60.4431	45.0313	52.5599	38.7521	31.6951	31.7787	57.3621	41.0646	51.8539
AS3MT	1.32425	0.643689	0.164512	0.883913	0.187338	0.381113	0.489578	0.163549	0.144667	0.53569	0.299141	0.215986	0.0997433	0.367566	0.0694554	0.0661196	0.0451717	0.0327119
ASAH1	28.6191	42.2612	22.0254	15.5166	25.6691	13.8324	9.84871	10.9235	7.56306	54.138	68.3706	39.2972	40.6293	32.9332	23.7053	21.6886	16.9267	14.2216
ASAH2	2.97236	0.969045	1.42567	0.740143	0.677646	0.555819	1.66661	0.953418	1.31928	1.41049	0.849344	1.67278	0.287921	0.297391	0.639438	1.3266	2.35042	1.68788
ASAH2B	6.8069	8.26963	4.29862	2.16481	3.7997	2.63892	4.83301	7.03125	4.64867	5.51751	7.66285	2.74834	3.81821	3.41707	3.4834	5.90311	8.66708	6.40763
ASAP1	151.326	140.936	162.142	254.478	180.878	201.41	171.866	151.469	157.696	181.877	172.299	185.312	203.034	205.77	197.542	191.639	163.356	193.085
ASAP2	114.405	120.815	116.405	69.2702	67.53	62.2973	87.5853	77.834	85.513	148.976	152.465	169.16	111.707	100.774	116.82	136.646	121.918	140.425
ASAP3	22.7626	19.6564	15.9902	14.1562	11.7899	11.724	12.8331	9.415	9.67469	17.9423	14.141	11.1752	12.2397	6.19053	9.27602	12.3258	5.80922	4.81353
ASB1	9.22667	11.5973	11.3861	8.64083	16.864	15.7172	17.4424	23.4074	23.0333	11.1313	14.2783	16.2101	14.4686	17.5809	20.4415	20.385	27.0426	30.1934
ASB13	8.83993	13.1698	9.20843	1.43409	4.32801	2.97102	4.47674	4.10936	3.82175	14.712	13.7291	14.9821	10.48	8.17147	7.38648	8.9481	8.01268	7.76723
ASB14	0.331593	0.196663	0.684502	0.514867	0.149338	0.287608	0.431184	0.546269	0.424728	0.700664	0.549261	0.73692	0.391141	0.247717	0.687206	0.296391	0.100257	0.437685
ASB16	0.718336	0.982917	0.885883	0.441329	0.447815	0.47928	0.364863	0.351663	0.37418	0.879122	1.51029	0.634278	0.556078	0.495334	1.03076	0.891476	0.210054	0.577949
ASB16-AS1	3.64653	4.32449	2.97186	1.83855	1.04477	1.43764	2.38764	1.83321	2.0705	3.83042	2.8832	3.29563	2.06409	1.23819	0.858982	3.01977	4.29722	1.82897
ASB6	15.7934	14.9389	15.5547	11.3194	18.3564	13.7961	14.8559	13.9352	15.3651	20.6996	18.397	19.0346	21.8983	17.8285	20.9568	19.4961	22.0347	20.5666
ASB7	21.0499	21.8186	23.6431	17.7963	30.1462	25.1411	19.7968	21.7168	21.5162	23.5468	24.8496	31.1921	24.2446	25.5047	24.0488	23.1701	26.9424	27.5679
ASB8	28.2875	28.8949	29.3051	17.3183	18.8041	20.4451	23.6433	22.6531	23.2051	26.2712	21.5547	25.666	15.0552	14.1143	14.4293	19.4368	15.7248	19.6914
ASB9	5.1935	2.75199	2.67549	1.94886	2.68639	1.88488	2.45396	1.45655	1.58385	6.69438	3.02049	4.78943	3.59767	1.73342	2.23319	3.49634	2.20356	3.06319
ASCC1	22.6559	15.332	17.4856	15.1857	14.0285	15.7491	19.631	18.2837	19.5446	19.577	15.9258	15.8417	13.882	15.3524	15.9753	17.0665	15.5245	16.1907
ASCC2	37.1826	34.7918	32.5403	31.3273	25.3706	27.9522	31.3365	34.2007	36.0361	28.9178	27.4582	26.894	24.4011	27.238	26.6254	34.4292	34.1537	34.3505
ASCC3	81.2713	65.0626	98.2434	123.544	111.332	115.546	112.115	99.1166	102.197	73.8314	61.7806	88.5415	87.8668	90.628	105.986	91.5546	81.8287	86.7514
ASF1A	29.724	28.1086	36.7712	20.3632	20.8935	17.8575	15.8176	14.7675	18.2243	23.1515	28.2819	24.8064	21.3509	15.1048	21.1286	18.2517	14.6231	18.0466
ASF1B	14.2543	15.1355	14.3103	8.34667	6.71583	9.6476	7.03008	6.34606	6.71381	5.56569	5.629	6.14027	4.34065	1.98104	3.43563	3.37782	2.60419	3.93836
ASGR1	4.19902	4.91418	3.17324	2.53716	2.98487	2.14044	2.22184	2.78296	2.30686	3.34724	2.05945	2.57897	4.88811	4.45721	2.74852	6.1037	6.61048	6.12629
ASH1L	61.0353	60.3433	63.8353	79.6758	65.8104	69.0899	66.0862	66.8632	56.6997	62.2296	69.7436	65.6999	75.1927	80.715	71.9695	70.4507	55.985	56.5579
ASH1L-AS1	0.733753	0.984636	0.560891	1.03297	0.302455	0.902627	0.698814	0.73282	0.579351	0.824028	0.549261	0.614117	0.786814	0.5036	0.348606	0.30388	0.20358	0.656477
ASH2L	103.205	72.1389	77.3995	46.7702	41.0406	38.4624	45.792	43.5895	41.6939	103.17	84.3249	78.8398	36.1322	36.8951	41.7418	44.9771	45.2712	37.7418
ASIC1	0.773585	0.196663	0.435629	0.625174	0.0001	0.159827	0.199062	0.26018	0.172246	1.79043	0.961132	0.491314	0.703973	0.990569	0.171876	0.474166	0.100257	0.437685
ASIC3	0.110598	0.58979	0.435629	0.110407	0.0001	0.159827	0.132741	0.104132	0.137817	0.194701	0.13739	0.0001	0.234724	0.0001	0.171876	0.414908	0.200414	0.109496
ASL	20.2677	24.1771	16.3982	14.2145	20.1473	16.8353	23.9086	25.6919	23.2637	20.879	17.436	18.175	20.7022	18.0762	19.8564	22.9331	21.38	25.8176
ASMTL	18.84	15.9217	12.8171	11.8029	14.0285	14.9505	15.3533	14.8506	15.6426	17.5504	14.6902	11.7892	16.854	14.3619	15.2882	16.1776	14.6231	16.1907
ASMTL-AS1	0.442091	1.17948	1.61778	0.183945	0.298577	0.95846	0.398023	0.494253	1.01003	0.781229	1.23571	1.71935	0.156516	0.990569	1.37431	0.592683	0.500886	1.42225
ASNA1	33.8123	33.6124	30.8604	25.7015	23.4305	27.2175	25.9976	25.93	29.495	30.7859	27.1836	24.9292	25.9261	20.5523	23.5335	31.2293	27.6436	28.9901
ASNS	8.89517	10.8111	12.5682	19.5245	30.8924	24.7897	59.6553	72.2761	67.9634	9.26311	18.2597	17.1926	32.4565	45.3141	38.9933	15.8221	35.3556	25.2706
ASNSD1	53.1491	57.7898	53.8191	51.9546	55.9644	47.1837	49.1769	47.5681	45.6542	47.755	52.1703	53.2969	48.9975	45.8093	51.8765	48.4139	53.484	52.5103
ASPDH	0.0553489	0.58979	0.0623184	0.0001	0.0001	0.0639907	0.0001	0.0521161	0.080435	0.116861	0.0001	0.245707	0.117412	0.0001	0.0001	0.0001	0.0001	0.0001
ASPH	105.968	134.056	122.321	88.0251	104.467	93.8085	88.9353	99.1171	105.98	119.018	166.534	139.996	105.308	142.875	144.293	101.391	163.457	162.563
ASPHD1	0.718336	0.196663	0.187076	0.882557	0.149338	0.383444	1.59179	1.097	0.736646	0.555454	0.621433	0.491314	1.01681	0.247717	0.171876	1.31296	0.901515	0.984665
ASPHD2	15.304	19.2633	14.492	11.3617	12.8346	14.7104	15.2207	12.8221	11.1667	17.6014	13.18	17.6838	14.0385	16.8381	12.7116	20.6925	20.332	18.2693
[truncated: 21,972 more rows]

## Sheet: Lipidomics
class	TNF-0hrs_0a	TNF-0hrs_0b	TNF-0hrs_0c	TNF-10hrs_10a	TNF-10hrs_10b	TNF-10hrs_10c	TNF-4hrs_4a	TNF-4hrs_4b	TNF-4hrs_4c
CE	0.100408	0.492085	0.335087	0.185358	0.257104	0.139752	0.200904	0.220718	0.131903
Cer	0.219643	0.185226	0.188162	0.392183	0.15044	0.150221	0.37739	0.173086	0.175245
Chol	33.8713	31.3757	33.351	32.804	30.9986	30.2117	26.1563	31.5287	32.4001
CL	0.284202	0.272808	0.347188	0.266484	0.255267	0.254096	0.260468	0.291284	0.281681
DAG	0.764796	2.4038	0.93477	1.70618	2.49245	0.9933	1.09828	1.25896	0.891528
HexCer				0.00624109	0.00955738	0.00632991
LPA	0.0190458	0.0168475	0.0194782	0.0136909	0.0181202	0.0146327	0.0174656	0.0165648	0.0151072
LPC	0.0884006	0.100043	0.105747	0.0877189	0.0945102	0.0905403	0.0919522	0.106942	0.110922
LPE	0.0912688	0.0950142	0.0837224	0.0872741	0.0620398	0.0873897	0.0856842	0.101573	0.0928617
LPE O-	0.0219424	0.0329688	0.0283534	0.0271252	0.0235755	0.0284517	0.0246623	0.032696	0.0310619
LPG	0.0105346	0.00771813	0.00822661	0.00765518	0.00655418	0.00634611	0.00926199	0.00782109	0.00647708
LPI	0.123925	0.118967	0.0923489	0.0848306	0.0740795	0.0683263	0.0926372	0.095927	0.0781828
LPS	0.0183329	0.016904	0.015198	0.0188899	0.0167972	0.0183345	0.011793	0.0134524	0.0166458
PA	0.189951	0.204981	0.199552	0.210979	0.248874	0.164822	0.201664	0.20854	0.154934
PC	33.556	36.293	34.1695	35.7444	36.2963	38.5185	40.0403	37.4557	37.3999
PC O-	0.791776	0.937164	1.02328	0.771867	0.84146	1.07717	0.917659	0.986762	1.08399
PE	10.8128	9.21365	9.55411	10.4387	10.103	10.5208	11.2585	8.92125	9.41374
PE O-	6.71512	6.51624	6.35138	5.6809	6.22987	5.78084	6.86563	5.93289	6.01936
PG	0.726844	0.627272	0.498904	0.579254	0.616238	0.522677	0.705351	0.61538	0.558856
PI	4.09484	4.01275	4.77474	3.71216	3.91976	4.03803	3.97953	4.24423	3.9101
PS	4.71562	4.56271	5.60208	4.42964	4.71366	4.76753	4.60319	4.9014	4.59971
SM	2.58753	2.41023	2.31275	2.34325	2.36373	2.53905	2.41825	2.41665	2.59519
Sulf	0.00129265	0.00288532	0.00438384	0.00127767	0.00407546	0.00116061	0.0015452	0.002881	0.00191716
TAG	0.194452	0.100995		0.399975	0.203936		0.581568	0.466611	0.0305355
